# Supplementary material for: Identification and prognostic value of DLGAP5 in endometrial cancer
Source: PeerJ. 2020 Nov 27;8:e10433. doi: 10.7717/peerj.10433 (PMC7703392; doi:10.7717/peerj.10433)
Supplement: Supplemental Information 1 [file peerj-08-10433-s001.xlsx]

## Sheet: GSE17025
ID	adj.P.Val	P.Value	t	B	logFC	Gene.symbol	Gene.title
237828_at	7.44e-17	1.36e-21	12.4795	38.2256	-4.56369	SRRM4	serine/arginine repetitive matrix 4
228027_at	5.79e-14	2.12e-18	10.9381	31.1839	-2.35525	ARMCX5-GPRASP2///GPRASP2	ARMCX5-GPRASP2 readthrough///G protein-coupled receptor associated sorting protein 2
211998_at	1.43e-13	7.84e-18	10.6677	29.9273	-3.00861	MIR4738///H3F3B///H3F3A	microRNA 4738///H3 histone, family 3B///H3 histone, family 3A
206622_at	4.48e-13	3.28e-17	10.3728	28.5521	-4.9565	TRH	thyrotropin releasing hormone
208815_x_at	5.38e-13	4.92e-17	-10.289	28.1606	1.3796	HSPA4	heat shock protein family A (Hsp70) member 4
226680_at	6.83e-13	7.49e-17	10.2026	27.7563	-1.78297	IKZF5	IKAROS family zinc finger 5
202934_at	6.92e-13	8.86e-17	-10.168	27.5945	3.15355	HK2	hexokinase 2
209242_at	1.28e-12	1.87e-16	10.0149	26.8775	-4.39237	PEG3	paternally expressed 3
227488_at	1.35e-12	2.39e-16	9.96386	26.638	-4.15801	MIR503///MIR424///MIR503HG	microRNA 503///microRNA 424///MIR503 host gene
210046_s_at	1.35e-12	2.68e-16	-9.94056	26.5288	2.46674	IDH2	isocitrate dehydrogenase (NADP(+)) 2, mitochondrial
228239_at	1.35e-12	2.84e-16	9.92854	26.4724	-1.63851	SMIM11A	small integral membrane protein 11A
200648_s_at	1.35e-12	2.95e-16	-9.92081	26.4361	2.21931	GLUL	glutamate-ammonia ligase
213398_s_at	1.82e-12	4.32e-16	9.8428	26.0701	-1.31868	SDR39U1	short chain dehydrogenase/reductase family 39U member 1
201129_at	2.06e-12	5.29e-16	9.80132	25.8755	-1.29614	SRSF7	serine and arginine rich splicing factor 7
33323_r_at	2.23e-12	6.13e-16	-9.77099	25.7331	2.59619	SFN	stratifin
218257_s_at	2.67e-12	7.81e-16	-9.72115	25.499	1.71354	UGGT1	UDP-glucose glycoprotein glucosyltransferase 1
242136_x_at	3.48e-12	1.09e-15	9.65247	25.1765	-2.19566	MGC70870	C-terminal binding protein 2 pseudogene
242708_at	3.48e-12	1.19e-15	9.63523	25.0955	-2.44118
46256_at	3.48e-12	1.21e-15	9.63145	25.0777	-1.49354	SPSB3	splA/ryanodine receptor domain and SOCS box containing 3
1556329_a_at	3.68e-12	1.42e-15	9.5987	24.9239	-5.90566	PCDH10	protocadherin 10
204742_s_at	3.68e-12	1.49e-15	9.58807	24.874	-2.24413	PDS5B	PDS5 cohesin associated factor B
228905_at	3.68e-12	1.55e-15	9.58108	24.8411	-1.95805	PCM1	pericentriolar material 1
228635_at	3.68e-12	1.55e-15	9.5807	24.8393	-4.79091	PCDH10	protocadherin 10
202721_s_at	3.92e-12	1.72e-15	-9.55913	24.738	2.21182	GFPT1	glutamine--fructose-6-phosphate transaminase 1
206571_s_at	4.37e-12	2e-15	-9.52843	24.5938	1.74781	MAP4K4	mitogen-activated protein kinase kinase kinase kinase 4
212311_at	4.91e-12	2.33e-15	-9.49675	24.4449	2.0984	SEL1L3	SEL1L family member 3
209894_at	5.78e-12	2.95e-15	9.44836	24.2175	-3.20612	LEPROT///LEPR	leptin receptor overlapping transcript///leptin receptor
33322_i_at	5.78e-12	2.96e-15	-9.44797	24.2156	2.06457	SFN	stratifin
236141_at	6.36e-12	3.37e-15	9.42119	24.0898	-4.39432	HAND2-AS1	HAND2 antisense RNA 1 (head to head)
223315_at	6.59e-12	3.61e-15	9.40706	24.0234	-2.57317	NTN4	netrin 4
208649_s_at	9.4e-12	5.33e-15	-9.32732	23.6486	2.08122	VCP	valosin containing protein
212008_at	1.22e-11	7.16e-15	-9.26683	23.3643	1.29072	UBXN4	UBX domain protein 4
205752_s_at	1.52e-11	9.44e-15	9.21019	23.0981	-1.96835	GSTM5	glutathione S-transferase mu 5
228012_at	1.52e-11	9.7e-15	9.20458	23.0717	-1.24103	SNHG4///MATR3	small nucleolar RNA host gene 4///matrin 3
209263_x_at	1.52e-11	9.74e-15	9.20377	23.0679	-1.43299	TSPAN4	tetraspanin 4
224097_s_at	1.54e-11	1.01e-14	-9.19541	23.0286	1.7582	F11R	F11 receptor
229891_x_at	1.59e-11	1.08e-14	9.18298	22.9702	-1.66895	GPALPP1	GPALPP motifs containing 1
219578_s_at	2.19e-11	1.53e-14	9.11177	22.6355	-2.99745	CPEB1	cytoplasmic polyadenylation element binding protein 1
221909_at	2.25e-11	1.61e-14	-9.10109	22.5853	3.38019	RNFT2	ring finger protein, transmembrane 2
229317_at	2.5e-11	1.83e-14	9.07446	22.4602	-1.54662	KPNA5	karyopherin subunit alpha 5
222041_at	2.8e-11	2.1e-14	9.04641	22.3285	-1.72969	OVCA2///DPH1	ovarian tumor suppressor candidate 2///diphthamide biosynthesis 1
1558143_a_at	2.87e-11	2.2e-14	-9.03648	22.2818	1.92957	BCL2L11	BCL2 like 11
213918_s_at	2.93e-11	2.31e-14	-9.02698	22.2372	1.64132	NIPBL	NIPBL, cohesin loading factor
201041_s_at	2.95e-11	2.38e-14	9.02086	22.2084	-3.1166	DUSP1	dual specificity phosphatase 1
1552733_at	3.34e-11	2.75e-14	8.99107	22.0685	-2.43421	KLHDC1	kelch domain containing 1
221764_at	3.36e-11	2.83e-14	-8.98506	22.0403	2.02743	R3HDM4	R3H domain containing 4
206122_at	3.83e-11	3.29e-14	8.95389	21.8939	-3.01823	SOX15	SRY-box 15
244704_at	4.36e-11	3.83e-14	8.92268	21.7474	-1.58871	NFYB	nuclear transcription factor Y subunit beta
225352_at	4.36e-11	3.9e-14	8.91888	21.7295	-1.46028	SEC62	SEC62 homolog, preprotein translocation factor
204294_at	4.36e-11	3.99e-14	8.91434	21.7082	-1.89658	AMT	aminomethyltransferase
206648_at	4.38e-11	4.08e-14	8.90961	21.686	-1.41245	ZNF571	zinc finger protein 571
225409_at	4.4e-11	4.18e-14	8.90468	21.6628	-1.05614	COA5	cytochrome c oxidase assembly factor 5
227448_at	4.78e-11	4.63e-14	8.88387	21.5651	-1.73383	ARGLU1	arginine and glutamate rich 1
203599_s_at	4.79e-11	4.79e-14	8.87668	21.5314	-1.28872	WBP4	WW domain binding protein 4
229303_at	4.79e-11	4.82e-14	8.87564	21.5265	-1.16483	SF3B1	splicing factor 3b subunit 1
201088_at	5.29e-11	5.42e-14	-8.85151	21.4132	1.47412	KPNA2	karyopherin subunit alpha 2
227113_at	6.62e-11	6.9e-14	8.80196	21.1807	-2.76759	ADHFE1	alcohol dehydrogenase, iron containing 1
228730_s_at	6.77e-11	7.18e-14	8.79354	21.1412	-1.6091	SCRN2	secernin 2
241728_at	8.05e-11	8.69e-14	8.75443	20.9577	-2.09055
55705_at	8.53e-11	9.36e-14	-8.73912	20.8859	1.23719	R3HDM4	R3H domain containing 4
229086_at	9.45e-11	1.05e-13	8.71459	20.7709	-1.9029	ZNF436-AS1	ZNF436 antisense RNA 1
209265_s_at	1.08e-10	1.22e-13	8.6842	20.6284	-1.42546	METTL3	methyltransferase like 3
236277_at	1.08e-10	1.25e-13	8.67987	20.6081	-3.75851	PAK3	p21 (RAC1) activated kinase 3
226358_at	1.15e-10	1.35e-13	8.66427	20.535	-1.73288	APH1B	aph-1 homolog B, gamma-secretase subunit
228941_at	1.16e-10	1.37e-13	8.66016	20.5158	-1.475	ALG10B///ALG10	ALG10B, alpha-1,2-glucosyltransferase///ALG10, alpha-1,2-glucosyltransferase
201514_s_at	1.22e-10	1.48e-13	-8.64542	20.4467	1.51173	G3BP1	G3BP stress granule assembly factor 1
1559255_a_at	1.25e-10	1.53e-13	8.63832	20.4134	-4.53476
239123_at	1.29e-10	1.61e-13	8.62803	20.3652	-2.79935	TSC22D1	TSC22 domain family member 1
218308_at	1.39e-10	1.76e-13	-8.6098	20.2798	2.73141	TACC3	transforming acidic coiled-coil containing protein 3
227572_at	1.42e-10	1.82e-13	8.60188	20.2427	-1.18058	USP30	ubiquitin specific peptidase 30
226873_at	1.49e-10	1.94e-13	8.58888	20.1818	-1.58733	FAM63B	family with sequence similarity 63 member B
202259_s_at	1.49e-10	1.96e-13	8.58667	20.1714	-1.71024	N4BP2L2	NEDD4 binding protein 2 like 2
230497_at	1.68e-10	2.3e-13	8.55446	20.0206	-3.40794	CELF5	CUGBP, Elav-like family member 5
227593_at	1.68e-10	2.3e-13	8.55442	20.0204	-1.71712	FLJ37453	uncharacterized LOC729614
228185_at	1.68e-10	2.3e-13	8.55424	20.0196	-1.47348	ZNF25	zinc finger protein 25
201291_s_at	1.82e-10	2.52e-13	-8.53489	19.929	3.39178	TOP2A	topoisomerase (DNA) II alpha
218420_s_at	1.83e-10	2.6e-13	-8.52918	19.9023	1.49008	PROSER1	proline and serine rich 1
1554007_at	1.83e-10	2.6e-13	8.52851	19.8992	-2.77752
218490_s_at	1.94e-10	2.8e-13	8.51371	19.8299	-2.0023	ZNF302	zinc finger protein 302
225339_at	1.95e-10	2.86e-13	8.50904	19.808	-1.27403	SPAG9	sperm associated antigen 9
219402_s_at	1.95e-10	2.89e-13	-8.50726	19.7997	1.47652	DERL1	derlin 1
217755_at	2.23e-10	3.34e-13	-8.47708	19.6585	2.73464	HN1	hematological and neurological expressed 1
221908_at	2.38e-10	3.62e-13	-8.4609	19.5828	2.38395	RNFT2	ring finger protein, transmembrane 2
229369_at	2.41e-10	3.7e-13	8.45618	19.5608	-3.60333	VSIG2	V-set and immunoglobulin domain containing 2
200021_at	2.44e-10	3.8e-13	-8.45061	19.5347	1.37788	CFL1	cofilin 1
228916_at	2.48e-10	3.9e-13	8.44517	19.5093	-1.26057	CWF19L2	CWF19-like 2, cell cycle control (S. pombe)
203217_s_at	2.49e-10	3.96e-13	8.44222	19.4955	-2.58943	ST3GAL5	ST3 beta-galactoside alpha-2,3-sialyltransferase 5
235264_at	2.51e-10	4.05e-13	8.43766	19.4742	-1.57683	HCFC2	host cell factor C2
222533_at	2.82e-10	4.58e-13	8.41189	19.3537	-1.07005	CRBN	cereblon
223606_x_at	2.95e-10	4.86e-13	8.39986	19.2975	-1.29004	GPALPP1	GPALPP motifs containing 1
235125_x_at	2.97e-10	4.94e-13	8.39659	19.2822	-1.64558	MIGA1	mitoguardin 1
204315_s_at	3.19e-10	5.43e-13	-8.37709	19.1911	2.7305	GTSE1	G2 and S-phase expressed 1
213568_at	3.19e-10	5.43e-13	8.37693	19.1903	-3.12439	OSR2	odd-skipped related transciption factor 2
204794_at	4.58e-10	7.88e-13	8.29997	18.831	-2.99443	DUSP2	dual specificity phosphatase 2
202134_s_at	5.25e-10	9.12e-13	-8.26992	18.6908	2.52775	WWTR1	WW domain containing transcription regulator 1
228174_at	5.34e-10	9.38e-13	8.26391	18.6628	-1.43297	SCAI	suppressor of cancer cell invasion
235304_at	5.61e-10	1e-12	8.24981	18.597	-1.38006
1553998_at	5.61e-10	1.01e-12	8.24972	18.5966	-2.41919	DMRTC1B///DMRTC1	DMRT like family C1B///DMRT like family C1
233208_x_at	6.04e-10	1.09e-12	-8.23229	18.5153	2.20747	CPSF2	cleavage and polyadenylation specific factor 2
207223_s_at	6.48e-10	1.19e-12	-8.21558	18.4374	1.53535	PTBP3	polypyrimidine tract binding protein 3
227982_at	7.06e-10	1.3e-12	8.19586	18.3455	-1.30042	SEPSECS	Sep (O-phosphoserine) tRNA:Sec (selenocysteine) tRNA synthase
200685_at	7.83e-10	1.46e-12	8.17233	18.2359	-1.67967	SRSF11	serine and arginine rich splicing factor 11
226584_s_at	8.29e-10	1.56e-12	-8.15854	18.1717	1.86678	FAM110A	family with sequence similarity 110 member A
202182_at	8.5e-10	1.62e-12	8.15132	18.1381	-1.89062	KAT2A	lysine acetyltransferase 2A
208804_s_at	8.73e-10	1.68e-12	8.14378	18.103	-1.3126	SRSF6	serine and arginine rich splicing factor 6
201695_s_at	8.83e-10	1.71e-12	-8.13955	18.0833	1.94976	PNP	purine nucleoside phosphorylase
227805_at	9.43e-10	1.84e-12	8.12397	18.0108	-2.00086	METAP1D	methionyl aminopeptidase type 1D (mitochondrial)
227371_at	9.83e-10	1.94e-12	-8.11329	17.9611	1.81789	BAIAP2L1	BAI1 associated protein 2 like 1
213607_x_at	1e-09	2e-12	-8.10691	17.9314	2.15974	NADK	NAD kinase
1598_g_at	1.07e-09	2.16e-12	8.09163	17.8603	-2.59639	GAS6	growth arrest specific 6
218806_s_at	1.13e-09	2.3e-12	-8.07788	17.7964	2.98248	VAV3	vav guanine nucleotide exchange factor 3
235607_at	1.14e-09	2.33e-12	8.07549	17.7853	-1.71496	LOC101928963	uncharacterized LOC101928963
231088_at	1.17e-09	2.43e-12	8.06696	17.7457	-2.20182	MORF4L2-AS1	MORF4L2 antisense RNA 1
229111_at	1.19e-09	2.48e-12	8.06241	17.7245	-1.90046
1556148_s_at	1.2e-09	2.52e-12	8.0592	17.7096	-1.66959	LOC105377832	uncharacterized LOC105377832
210337_s_at	1.23e-09	2.64e-12	-8.04985	17.6661	2.04821	ACLY	ATP citrate lyase
229705_at	1.23e-09	2.66e-12	8.0478	17.6566	-1.45109	PIK3C3	phosphatidylinositol 3-kinase catalytic subunit type 3
216125_s_at	1.23e-09	2.67e-12	-8.04694	17.6526	1.91017	RANBP9	RAN binding protein 9
210011_s_at	1.23e-09	2.68e-12	-8.04615	17.6489	1.5091	EWSR1	EWS RNA binding protein 1
222663_at	1.29e-09	2.84e-12	8.03479	17.5961	-1.54646	RIOK2	RIO kinase 2
200692_s_at	1.29e-09	2.87e-12	-8.03263	17.5861	1.68615	HSPA9	heat shock protein family A (Hsp70) member 9
205802_at	1.29e-09	2.87e-12	8.03215	17.5839	-2.83245	TRPC1	transient receptor potential cation channel subfamily C member 1
219137_s_at	1.31e-09	2.95e-12	8.02646	17.5574	-1.04628	MFF	mitochondrial fission factor
214098_at	1.32e-09	2.99e-12	8.0239	17.5456	-1.43011	KIAA1107	KIAA1107
209945_s_at	1.36e-09	3.11e-12	-8.01554	17.5067	1.08254	GSK3B	glycogen synthase kinase 3 beta
239130_at	1.43e-09	3.31e-12	8.00293	17.4482	-3.30611	MIR3671///MIR101-1	microRNA 3671///microRNA 101-1
210409_at	1.49e-09	3.48e-12	7.99236	17.3991	-2.10306	AFDN-AS1	AFDN antisense RNA 1 (head to head)
217094_s_at	1.49e-09	3.49e-12	-7.99166	17.3959	1.67703	ITCH	itchy E3 ubiquitin protein ligase
207574_s_at	1.49e-09	3.51e-12	7.99067	17.3913	-2.43889	GADD45B	growth arrest and DNA damage inducible beta
202319_at	1.49e-09	3.54e-12	7.98868	17.382	-1.31957	SENP6	SUMO1/sentrin specific peptidase 6
200728_at	1.51e-09	3.64e-12	-7.98314	17.3563	1.6253	ACTR2	ARP2 actin related protein 2 homolog
219099_at	1.51e-09	3.64e-12	-7.98267	17.3541	1.83625	TIGAR	TP53 induced glycolysis regulatory phosphatase
219778_at	1.56e-09	3.81e-12	7.97338	17.311	-4.01161	ZFPM2	zinc finger protein, FOG family member 2
204825_at	1.56e-09	3.83e-12	-7.97258	17.3073	3.31484	MELK	maternal embryonic leucine zipper kinase
202768_at	1.57e-09	3.87e-12	7.96996	17.2952	-4.96976	FOSB	FosB proto-oncogene, AP-1 transcription factor subunit
222608_s_at	1.63e-09	4.05e-12	-7.9609	17.2531	3.14446	ANLN	anillin actin binding protein
203002_at	1.75e-09	4.38e-12	7.94461	17.1776	-1.46902	AMOTL2	angiomotin like 2
226721_at	1.84e-09	4.65e-12	7.93212	17.1197	-1.46218	DPY19L4	dpy-19 like 4 (C. elegans)
225223_at	1.97e-09	5.02e-12	7.91609	17.0454	-1.15664	SMAD5	SMAD family member 5
225544_at	1.98e-09	5.07e-12	7.91398	17.0356	-2.19175	TBX3	T-box 3
232395_x_at	1.99e-09	5.13e-12	7.9114	17.0236	-2.01178	AGBL3	ATP/GTP binding protein like 3
232224_at	2.15e-09	5.6e-12	7.89314	16.939	-2.73152	MASP1	mannan binding lectin serine peptidase 1
222977_at	2.15e-09	5.63e-12	-7.89225	16.9349	1.0291	SURF4	surfeit 4
211580_s_at	2.24e-09	5.9e-12	-7.8826	16.8902	2.29119	PIK3R3	phosphoinositide-3-kinase regulatory subunit 3
210052_s_at	2.24e-09	5.99e-12	-7.87939	16.8753	2.8501	TPX2	TPX2, microtubule nucleation factor
228751_at	2.24e-09	5.99e-12	7.87912	16.8741	-1.59649	CLK4	CDC like kinase 4
235709_at	2.26e-09	6.07e-12	-7.87661	16.8625	3.16055	GAS2L3	growth arrest specific 2 like 3
212141_at	2.26e-09	6.12e-12	-7.87466	16.8535	2.95796	MCM4	minichromosome maintenance complex component 4
235410_at	2.26e-09	6.17e-12	7.8731	16.8462	-1.94108	NPHP3	nephronophthisis 3 (adolescent)
225022_at	2.36e-09	6.51e-12	7.86195	16.7946	-1.01365	GOPC	golgi associated PDZ and coiled-coil motif containing
209292_at	2.36e-09	6.52e-12	7.86163	16.7931	-3.23309	ID4	inhibitor of DNA binding 4, HLH protein
222028_at	2.39e-09	6.64e-12	7.85778	16.7753	-1.12826	ZNF45	zinc finger protein 45
202870_s_at	2.42e-09	6.78e-12	-7.8536	16.756	2.38375	CDC20	cell division cycle 20
201289_at	2.42e-09	6.82e-12	7.85225	16.7497	-2.31077	CYR61	cysteine rich angiogenic inducer 61
213101_s_at	2.42e-09	6.87e-12	-7.85073	16.7427	0.92379	ACTR3	ARP3 actin related protein 3 homolog
228772_at	2.53e-09	7.23e-12	7.84018	16.6938	-2.61062	HNMT	histamine N-methyltransferase
216905_s_at	2.54e-09	7.3e-12	-7.83797	16.6836	1.74323	ST14	suppression of tumorigenicity 14
204140_at	2.56e-09	7.41e-12	7.83489	16.6694	-1.41396	TPST1	tyrosylprotein sulfotransferase 1
239708_at	2.56e-09	7.45e-12	7.8337	16.6639	-4.71029
1556096_s_at	2.62e-09	7.67e-12	7.82767	16.636	-3.95993	UNC13C	unc-13 homolog C
230141_at	2.66e-09	7.84e-12	7.82326	16.6156	-2.01375	ARID4A	AT-rich interaction domain 4A
200641_s_at	2.76e-09	8.17e-12	-7.81469	16.576	1.41479	YWHAZ	tyrosine 3-monooxygenase/tryptophan 5-monooxygenase activation protein zeta
228361_at	2.76e-09	8.24e-12	-7.81278	16.5671	2.25085	E2F2	E2F transcription factor 2
224611_s_at	2.78e-09	8.34e-12	-7.81038	16.556	1.05213	DNAJC5	DnaJ heat shock protein family (Hsp40) member C5
204641_at	2.8e-09	8.46e-12	-7.80731	16.5419	2.87293	NEK2	NIMA related kinase 2
228882_at	2.9e-09	8.81e-12	7.79893	16.5031	-2.93799	TUB	tubby bipartite transcription factor
239752_at	2.94e-09	8.97e-12	7.79518	16.4858	-5.10264	CECR2	CECR2, histone acetyl-lysine reader
208612_at	3.14e-09	9.67e-12	-7.7795	16.4133	1.7297	PDIA3	protein disulfide isomerase family A member 3
212615_at	3.14e-09	9.69e-12	7.77893	16.4107	-1.28832	CHD9	chromodomain helicase DNA binding protein 9
204793_at	3.15e-09	9.8e-12	7.77658	16.3998	-1.95101	GPRASP1	G protein-coupled receptor associated sorting protein 1
226661_at	3.46e-09	1.08e-11	-7.75589	16.3043	2.65825	CDCA2	cell division cycle associated 2
201668_x_at	3.62e-09	1.14e-11	-7.745	16.254	2.62743	MARCKS	myristoylated alanine rich protein kinase C substrate
212022_s_at	3.83e-09	1.21e-11	-7.7322	16.1949	3.31026	MKI67	marker of proliferation Ki-67
242960_at	4.06e-09	1.29e-11	7.71885	16.1333	-1.49683
229784_at	4.3e-09	1.38e-11	7.70546	16.0716	-2.31544	MIR424///MIR503HG	microRNA 424///MIR503 host gene
202743_at	4.47e-09	1.45e-11	-7.69524	16.0245	1.74226	PIK3R3	phosphoinositide-3-kinase regulatory subunit 3
212186_at	4.47e-09	1.45e-11	-7.69509	16.0238	1.2698	ACACA	acetyl-CoA carboxylase alpha
57532_at	4.81e-09	1.57e-11	7.6781	15.9454	-0.964532	DVL2	dishevelled segment polarity protein 2
217834_s_at	4.81e-09	1.57e-11	-7.67761	15.9432	1.46568	SYNCRIP	synaptotagmin binding cytoplasmic RNA interacting protein
212473_s_at	5.45e-09	1.79e-11	-7.65014	15.8166	2.76088	MICAL2	microtubule associated monooxygenase, calponin and LIM domain containing 2
228465_at	5.48e-09	1.82e-11	7.64773	15.8055	-2.0577
223008_s_at	5.51e-09	1.83e-11	7.64558	15.7957	-1.05824	TMEM245	transmembrane protein 245
218151_x_at	5.59e-09	1.87e-11	-7.64125	15.7757	1.40438	SLC52A2	solute carrier family 52 member 2
1559296_at	5.61e-09	1.89e-11	7.63935	15.7669	-3.35287	ADAMTS9-AS2	ADAMTS9 antisense RNA 2
226181_at	5.79e-09	1.96e-11	7.63188	15.7326	-1.45812	TUBE1	tubulin epsilon 1
209335_at	6.15e-09	2.09e-11	7.61813	15.6693	-3.11293	DCN	decorin
224304_x_at	6.16e-09	2.11e-11	-7.6158	15.6586	1.44176	NIN	ninein
201068_s_at	6.16e-09	2.12e-11	-7.61529	15.6562	1.08184	PSMC2	proteasome 26S subunit, ATPase 2
211574_s_at	6.64e-09	2.3e-11	-7.59832	15.5782	2.0555	CD46	CD46 molecule
235048_at	6.64e-09	2.31e-11	7.59754	15.5746	-2.59956	FAM169A	family with sequence similarity 169 member A
223361_at	6.74e-09	2.36e-11	-7.5931	15.5542	2.11631	ABRACL	ABRA C-terminal like
212914_at	6.91e-09	2.43e-11	7.58688	15.5256	-1.87574	CBX7	chromobox 7
227705_at	6.98e-09	2.47e-11	7.58356	15.5103	-3.82724	TCEAL7	transcription elongation factor A like 7
207828_s_at	7.65e-09	2.71e-11	-7.56343	15.4179	2.25181	CENPF	centromere protein F
244786_at	8.16e-09	2.91e-11	7.54883	15.3508	-1.92404	SCARNA13///SNHG10	small Cajal body-specific RNA 13///small nucleolar RNA host gene 10
1559993_at	8.26e-09	2.97e-11	7.54481	15.3323	-1.58171	SFXN3	sideroflexin 3
208625_s_at	8.26e-09	2.99e-11	-7.54291	15.3236	1.35784	EIF4G1	eukaryotic translation initiation factor 4 gamma 1
207002_s_at	8.26e-09	3e-11	7.54256	15.322	-2.75474	PLAGL1	PLAG1 like zinc finger 1
204695_at	8.26e-09	3.01e-11	-7.54159	15.3175	2.7266	CDC25A	cell division cycle 25A
228538_at	8.26e-09	3.04e-11	7.53967	15.3087	-3.25139	ZNF662	zinc finger protein 662
1557659_a_at	8.26e-09	3.04e-11	7.53964	15.3086	-1.54789
224578_at	8.26e-09	3.05e-11	-7.53888	15.3051	1.09779	RCC2	regulator of chromosome condensation 2
217906_at	8.61e-09	3.2e-11	7.52911	15.2603	-1.18817	KLHDC2	kelch domain containing 2
204255_s_at	8.79e-09	3.28e-11	-7.52358	15.2349	1.9873	VDR	vitamin D (1,25- dihydroxyvitamin D3) receptor
202340_x_at	8.97e-09	3.36e-11	7.51836	15.211	-2.60602	NR4A1	nuclear receptor subfamily 4 group A member 1
220153_at	9.06e-09	3.41e-11	-7.51519	15.1964	1.8466	ENTPD7	ectonucleoside triphosphate diphosphohydrolase 7
240459_at	9.31e-09	3.53e-11	7.50841	15.1653	-1.31724	YTHDC1	YTH domain containing 1
229722_at	9.62e-09	3.66e-11	7.5007	15.1299	-1.97737	LOC100270804	uncharacterized LOC100270804
224818_at	1e-08	3.83e-11	-7.49108	15.0858	1.78957	SORT1	sortilin 1
211762_s_at	1.01e-08	3.88e-11	-7.48806	15.072	2.28603	KPNA2	karyopherin subunit alpha 2
232088_x_at	1.03e-08	3.96e-11	7.48423	15.0544	-2.98082	LINC00899	long intergenic non-protein coding RNA 899
222453_at	1.04e-08	4.03e-11	7.48018	15.0359	-2.56129	CYBRD1	cytochrome b reductase 1
1568647_at	1.06e-08	4.14e-11	7.4746	15.0103	-2.60121	LOC100505851	uncharacterized LOC100505851
220022_at	1.08e-08	4.23e-11	7.47009	14.9897	-3.39083	ZNF334	zinc finger protein 334
213375_s_at	1.08e-08	4.24e-11	7.46976	14.9881	-2.1124	N4BP2L1	NEDD4 binding protein 2 like 1
235369_at	1.12e-08	4.42e-11	7.46073	14.9468	-1.30961	C14orf28	chromosome 14 open reading frame 28
227070_at	1.15e-08	4.57e-11	7.45369	14.9145	-2.84953	GLT8D2	glycosyltransferase 8 domain containing 2
209773_s_at	1.15e-08	4.58e-11	-7.45329	14.9127	3.05784	RRM2	ribonucleotide reductase regulatory subunit M2
201466_s_at	1.15e-08	4.62e-11	7.45177	14.9057	-2.02339	JUN	Jun proto-oncogene, AP-1 transcription factor subunit
1555274_a_at	1.16e-08	4.69e-11	-7.44858	14.8912	1.90954	EPT1	ethanolaminephosphotransferase 1
228287_at	1.18e-08	4.79e-11	7.44406	14.8705	-1.63315	ING5	inhibitor of growth family member 5
236551_at	1.2e-08	4.86e-11	7.44106	14.8567	-3.35413	ZNF311	zinc finger protein 311
202512_s_at	1.2e-08	4.89e-11	7.4397	14.8505	-1.24401	ATG5	autophagy related 5
231715_s_at	1.2e-08	4.9e-11	-7.43914	14.8479	1.6325	MIR6741///PYCR2	microRNA 6741///pyrroline-5-carboxylate reductase family member 2
238484_s_at	1.2e-08	4.93e-11	7.43797	14.8426	-2.0093	SSBP2	single stranded DNA binding protein 2
209189_at	1.21e-08	5.01e-11	7.43442	14.8263	-3.8746	FOS	Fos proto-oncogene, AP-1 transcription factor subunit
201422_at	1.26e-08	5.22e-11	-7.42568	14.7864	2.35209	IFI30///PIK3R2	IFI30, lysosomal thiol reductase///phosphoinositide-3-kinase regulatory subunit 2
222280_at	1.3e-08	5.41e-11	7.41835	14.7528	-1.3336	TMEM147-AS1	TMEM147 antisense RNA 1
236641_at	1.35e-08	5.66e-11	-7.40867	14.7086	2.74868	KIF14	kinesin family member 14
209304_x_at	1.36e-08	5.71e-11	7.40683	14.7002	-2.01721	GADD45B	growth arrest and DNA damage inducible beta
218807_at	1.36e-08	5.76e-11	-7.40502	14.6919	2.51791	VAV3	vav guanine nucleotide exchange factor 3
218769_s_at	1.36e-08	5.77e-11	7.40462	14.69	-1.15118	ANKRA2	ankyrin repeat family A member 2
1559535_s_at	1.37e-08	5.85e-11	7.40181	14.6772	-1.90523	LOC100996419	uncharacterized LOC100996419
208453_s_at	1.42e-08	6.1e-11	-7.39284	14.6362	1.26565	XPNPEP1	X-prolyl aminopeptidase 1
227145_at	1.42e-08	6.12e-11	7.39232	14.6338	-1.95437	LOXL4	lysyl oxidase like 4
1556026_at	1.42e-08	6.15e-11	7.39127	14.629	-2.73893	LINC00893	long intergenic non-protein coding RNA 893
1556364_at	1.44e-08	6.23e-11	7.38856	14.6166	-3.3555	ADAMTS9-AS2	ADAMTS9 antisense RNA 2
242385_at	1.49e-08	6.47e-11	7.3805	14.5798	-3.39372	RORB	RAR related orphan receptor B
217140_s_at	1.52e-08	6.64e-11	-7.37502	14.5548	1.84543	VDAC1	voltage dependent anion channel 1
203970_s_at	1.52e-08	6.65e-11	7.37477	14.5536	-1.39249	PEX3	peroxisomal biogenesis factor 3
228393_s_at	1.54e-08	6.79e-11	7.37034	14.5334	-2.10933	ZNF302	zinc finger protein 302
56256_at	1.55e-08	6.88e-11	7.36772	14.5214	-1.27043	SIDT2	SID1 transmembrane family member 2
232044_at	1.55e-08	6.89e-11	7.36721	14.5191	-1.09431	RBBP6	RB binding protein 6, ubiquitin ligase
219918_s_at	1.57e-08	7.01e-11	-7.36366	14.5029	3.63918	ASPM	abnormal spindle microtubule assembly
230056_at	1.57e-08	7.05e-11	7.36235	14.4969	-1.59579	BPTF	bromodomain PHD finger transcription factor
222234_s_at	1.63e-08	7.34e-11	-7.35389	14.4583	2.15848	DBNDD1	dysbindin domain containing 1
230072_at	1.63e-08	7.39e-11	7.35262	14.4525	-1.38719	TBC1D15	TBC1 domain family member 15
212476_at	1.64e-08	7.46e-11	7.35059	14.4432	-1.30155	ACAP2	ArfGAP with coiled-coil, ankyrin repeat and PH domains 2
209360_s_at	1.65e-08	7.53e-11	-7.34861	14.4342	2.50687	LOC101928269///LOC100506403///RUNX1	uncharacterized LOC101928269///uncharacterized LOC100506403///runt related transcription factor 1
226933_s_at	1.67e-08	7.62e-11	7.34597	14.4222	-2.7758	ID4	inhibitor of DNA binding 4, HLH protein
204442_x_at	1.67e-08	7.65e-11	7.34519	14.4186	-3.10227	LTBP4	latent transforming growth factor beta binding protein 4
212549_at	1.67e-08	7.69e-11	7.34419	14.414	-1.0968	STAT5B	signal transducer and activator of transcription 5B
215743_at	1.69e-08	7.86e-11	7.3395	14.3927	-2.05662	NMT2	N-myristoyltransferase 2
212038_s_at	1.69e-08	7.88e-11	-7.33884	14.3897	2.33914	VDAC1	voltage dependent anion channel 1
216902_s_at	1.69e-08	7.9e-11	7.33852	14.3882	-2.25014	RRN3P1///RRN3P2///RRN3	RRN3 homolog, RNA polymerase I transcription factor pseudogene 1///RRN3 homolog, RNA polymerase I transcription factor pseudogene 2///RRN3 homolog, RNA polymerase I transcription factor
200832_s_at	1.7e-08	7.95e-11	-7.3371	14.3817	2.30193	SCD	stearoyl-CoA desaturase
203764_at	1.7e-08	8.01e-11	-7.33545	14.3742	3.14282	DLGAP5	DLG associated protein 5
226713_at	1.76e-08	8.29e-11	7.32831	14.3416	-1.3932	CCDC50	coiled-coil domain containing 50
218791_s_at	1.76e-08	8.33e-11	7.32732	14.3371	-1.13336	KATNBL1	katanin regulatory subunit B1 like 1
219854_at	1.79e-08	8.53e-11	7.32226	14.314	-0.92905	ZNF14	zinc finger protein 14
243843_at	1.81e-08	8.66e-11	7.31901	14.2992	-1.74002	N4BP2L1	NEDD4 binding protein 2 like 1
236265_at	1.81e-08	8.68e-11	7.31861	14.2974	-1.16623	SP4	Sp4 transcription factor
243_g_at	1.81e-08	8.72e-11	-7.31745	14.2921	1.06509	MAP4	microtubule associated protein 4
201037_at	1.82e-08	8.78e-11	-7.31606	14.2858	1.60977	PFKP	phosphofructokinase, platelet
222751_at	1.85e-08	8.95e-11	7.31196	14.2671	-0.86376	HERPUD2	HERPUD family member 2
218497_s_at	1.92e-08	9.34e-11	-7.30304	14.2264	1.16209	RNASEH1	ribonuclease H1
238992_at	1.94e-08	9.5e-11	7.29952	14.2104	-1.44611	POLI	DNA polymerase iota
243785_at	1.98e-08	9.72e-11	7.29447	14.1874	-1.90479	LOC100272217	uncharacterized LOC100272217
235725_at	2e-08	9.84e-11	7.292	14.1761	-1.39595	SMAD4	SMAD family member 4
205803_s_at	2.03e-08	1e-10	7.28854	14.1604	-2.8432	TRPC1	transient receptor potential cation channel subfamily C member 1
1552329_at	2.09e-08	1.04e-10	7.28068	14.1246	-1.24726	RBBP6	RB binding protein 6, ubiquitin ligase
201027_s_at	2.13e-08	1.06e-10	-7.2765	14.1056	1.34956	EIF5B	eukaryotic translation initiation factor 5B
210414_at	2.18e-08	1.09e-10	7.27063	14.0789	-2.26351	FLRT1	fibronectin leucine rich transmembrane protein 1
205283_at	2.21e-08	1.11e-10	7.26665	14.0607	-1.01059	FKTN	fukutin
208992_s_at	2.27e-08	1.14e-10	-7.26033	14.032	2.26679	STAT3	signal transducer and activator of transcription 3
222396_at	2.48e-08	1.25e-10	-7.24114	13.9447	1.43731	HN1	hematological and neurological expressed 1
200996_at	2.57e-08	1.3e-10	-7.23306	13.9079	1.51589	ACTR3	ARP3 actin related protein 3 homolog
229131_at	2.57e-08	1.31e-10	7.23211	13.9036	-1.06859	EXD2	exonuclease 3'-5' domain containing 2
210059_s_at	2.66e-08	1.36e-10	-7.22336	13.8639	1.41406	MAPK13	mitogen-activated protein kinase 13
219791_s_at	2.66e-08	1.36e-10	7.22289	13.8617	-4.79744	HAND2-AS1	HAND2 antisense RNA 1 (head to head)
222761_at	2.67e-08	1.37e-10	7.22174	13.8565	-1.19289	BIVM	basic, immunoglobulin-like variable motif containing
238601_at	2.73e-08	1.41e-10	7.21615	13.8311	-1.08136	PHKB	phosphorylase kinase regulatory subunit beta
225834_at	2.76e-08	1.43e-10	-7.21284	13.8161	2.45516	FAM72A///FAM72D///FAM72B///FAM72C	family with sequence similarity 72 member A///family with sequence similarity 72 member D///family with sequence similarity 72 member B///family with sequence similarity 72 member C
225154_at	2.77e-08	1.45e-10	-7.21038	13.8049	1.44512	SYAP1	synapse associated protein 1
218838_s_at	2.77e-08	1.45e-10	7.21032	13.8047	-1.03974	TTC31	tetratricopeptide repeat domain 31
204962_s_at	2.77e-08	1.45e-10	-7.20995	13.803	2.6047	SLC35F6///CENPA	solute carrier family 35 member F6///centromere protein A
226496_at	2.79e-08	1.47e-10	7.20741	13.7915	-1.18196	ZCCHC7	zinc finger CCHC-type containing 7
212807_s_at	2.8e-08	1.47e-10	-7.20633	13.7865	1.65827	SORT1	sortilin 1
228999_at	2.8e-08	1.48e-10	7.20565	13.7835	-1.35122	CHD2	chromodomain helicase DNA binding protein 2
229787_s_at	2.85e-08	1.52e-10	7.20006	13.7581	-2.16895	OGT	O-linked N-acetylglucosamine (GlcNAc) transferase
244534_at	2.85e-08	1.52e-10	7.19998	13.7577	-1.74558
216611_s_at	2.89e-08	1.54e-10	7.19665	13.7426	-4.84206	SLC6A2	solute carrier family 6 member 2
1554143_a_at	2.91e-08	1.56e-10	7.19451	13.7329	-2.7495	SUGT1P3	SGT1 homolog, MIS12 kinetochore complex assembly cochaperone pseudogene 3
235556_at	3.07e-08	1.65e-10	7.1825	13.6784	-1.22823	CREBRF	CREB3 regulatory factor
241535_at	3.1e-08	1.67e-10	7.17921	13.6634	-4.06417	LOC101060391	uncharacterized LOC101060391
218542_at	3.12e-08	1.69e-10	-7.1777	13.6566	3.22428	CEP55	centrosomal protein 55
226825_s_at	3.12e-08	1.69e-10	-7.17667	13.6519	1.88407	TMEM165	transmembrane protein 165
226446_at	3.15e-08	1.72e-10	-7.17382	13.639	2.76974	HES6	hes family bHLH transcription factor 6
201890_at	3.16e-08	1.73e-10	-7.17238	13.6325	3.2491	RRM2	ribonucleotide reductase regulatory subunit M2
207799_x_at	3.17e-08	1.74e-10	7.17146	13.6283	-2.67745	ARMCX4	armadillo repeat containing, X-linked 4
224860_at	3.17e-08	1.74e-10	7.17058	13.6243	-1.43353	TMEM261	transmembrane protein 261
232267_at	3.35e-08	1.85e-10	7.15827	13.5685	-3.87009	ADGRD1	adhesion G protein-coupled receptor D1
239755_at	3.36e-08	1.86e-10	7.157	13.5627	-2.26895
203578_s_at	3.38e-08	1.88e-10	-7.15497	13.5535	1.78438	SLC7A6	solute carrier family 7 member 6
200656_s_at	3.39e-08	1.89e-10	-7.15367	13.5476	1.44359	P4HB	prolyl 4-hydroxylase subunit beta
228232_s_at	3.39e-08	1.9e-10	7.15279	13.5437	-2.9889	VSIG2	V-set and immunoglobulin domain containing 2
222161_at	3.42e-08	1.92e-10	7.14995	13.5308	-3.70042	NAALAD2	N-acetylated alpha-linked acidic dipeptidase 2
1558796_a_at	3.47e-08	1.95e-10	7.14656	13.5154	-3.54619
203328_x_at	3.47e-08	1.96e-10	-7.14555	13.5109	1.06661	IDE	insulin degrading enzyme
227471_at	3.49e-08	1.98e-10	7.14347	13.5014	-1.16853	HACE1	HECT domain and ankyrin repeat containing E3 ubiquitin protein ligase 1
243023_at	3.49e-08	1.98e-10	7.14333	13.5008	-2.12616
230068_s_at	3.51e-08	2e-10	7.14099	13.4902	-3.33805	PEG3-AS1	PEG3 antisense RNA 1
233675_s_at	3.57e-08	2.04e-10	7.13706	13.4724	-3.76323	TPTE2P6	transmembrane phosphoinositide 3-phosphatase and tensin homolog 2 pseudogene 6
211015_s_at	3.58e-08	2.06e-10	-7.13504	13.4632	1.58285	HSPA4	heat shock protein family A (Hsp70) member 4
204162_at	3.58e-08	2.06e-10	-7.13496	13.4629	2.425	NDC80	NDC80, kinetochore complex component
211612_s_at	3.64e-08	2.11e-10	-7.13059	13.4431	1.5058	IL13RA1	interleukin 13 receptor subunit alpha 1
203594_at	3.7e-08	2.15e-10	-7.12631	13.4237	1.00784	RTCA	RNA 3'-terminal phosphate cyclase
232332_at	3.84e-08	2.24e-10	7.11774	13.3849	-3.58973	KIAA1210	KIAA1210
241996_at	4.03e-08	2.35e-10	7.10726	13.3375	-1.85269	RUFY2	RUN and FYVE domain containing 2
235124_at	4.05e-08	2.37e-10	7.10513	13.3279	-1.8181	EIF3J-AS1	EIF3J antisense RNA 1 (head to head)
210624_s_at	4.06e-08	2.38e-10	7.10415	13.3234	-1.25517	ILVBL	ilvB acetolactate synthase like
230177_at	4.08e-08	2.41e-10	7.10216	13.3144	-1.51119	GTF2H2B///GTF2H2	general transcription factor IIH subunit 2B (pseudogene)///general transcription factor IIH subunit 2
212984_at	4.12e-08	2.44e-10	7.09943	13.3021	-1.1197	ATF2	activating transcription factor 2
213451_x_at	4.13e-08	2.45e-10	7.09866	13.2986	-2.52133	TNXB///TNXA	tenascin XB///tenascin XA (pseudogene)
238694_at	4.17e-08	2.48e-10	7.09558	13.2847	-1.78131	DGKE	diacylglycerol kinase epsilon
230304_at	4.36e-08	2.6e-10	7.0855	13.2391	-1.17018
225927_at	4.37e-08	2.62e-10	7.08438	13.234	-1.34193	MAP3K1	mitogen-activated protein kinase kinase kinase 1
214945_at	4.54e-08	2.73e-10	7.07553	13.1941	-2.97806	LOC101930363///LOC101928349///LOC100507387///FAM153C///FAM153A///FAM153B	uncharacterized LOC101930363///uncharacterized LOC101928349///uncharacterized LOC100507387///family with sequence similarity 153, member C///family with sequence similarity 153 member A///family with sequence similarity 153 member B
202630_at	4.63e-08	2.79e-10	7.07067	13.1721	-1.19036	APPBP2	amyloid beta precursor protein binding protein 2
226366_at	4.69e-08	2.83e-10	7.06736	13.1572	-1.37629	SHPRH	SNF2 histone linker PHD RING helicase
228392_at	4.74e-08	2.87e-10	7.06479	13.1456	-1.71236	ZNF302	zinc finger protein 302
225132_at	4.75e-08	2.89e-10	7.0634	13.1393	-1.34369	FBXL3	F-box and leucine rich repeat protein 3
241421_at	4.77e-08	2.9e-10	7.06211	13.1334	-3.01453
208744_x_at	4.83e-08	2.95e-10	-7.05846	13.117	2.3612	HSPH1	heat shock protein family H (Hsp110) member 1
212353_at	5.05e-08	3.09e-10	-7.04846	13.0718	2.54506	SULF1	sulfatase 1
201001_s_at	5.13e-08	3.15e-10	-7.04465	13.0547	1.4009	TMEM189-UBE2V1///TMEM189///UBE2V2///UBE2V1	TMEM189-UBE2V1 readthrough///transmembrane protein 189///ubiquitin conjugating enzyme E2 V2///ubiquitin conjugating enzyme E2 V1
222473_s_at	5.21e-08	3.21e-10	-7.04044	13.0356	0.958655	ERBIN	erbb2 interacting protein
1552790_a_at	5.48e-08	3.39e-10	7.02919	12.9849	-1.52118	SEC62	SEC62 homolog, preprotein translocation factor
203799_at	5.62e-08	3.48e-10	7.02314	12.9576	-1.9387	LY75-CD302///CD302///LY75	LY75-CD302 readthrough///CD302 molecule///lymphocyte antigen 75
220189_s_at	5.79e-08	3.6e-10	-7.01611	12.9259	1.22224	MGAT4B	mannosyl (alpha-1,3-)-glycoprotein beta-1,4-N-acetylglucosaminyltransferase, isozyme B
225827_at	5.79e-08	3.61e-10	-7.01532	12.9224	1.42005	AGO2	argonaute 2, RISC catalytic component
222557_at	5.8e-08	3.63e-10	7.0146	12.9191	-2.20614	STMN3	stathmin 3
219355_at	5.81e-08	3.64e-10	7.01354	12.9143	-3.72505	CXorf57	chromosome X open reading frame 57
210191_s_at	5.96e-08	3.75e-10	-7.00754	12.8873	1.33895	PHTF1	putative homeodomain transcription factor 1
212968_at	5.96e-08	3.76e-10	7.00679	12.8839	-1.35808	RFNG	RFNG O-fucosylpeptide 3-beta-N-acetylglucosaminyltransferase
226344_at	5.98e-08	3.78e-10	7.00561	12.8786	-2.71985	ZMAT1	zinc finger matrin-type 1
203996_s_at	5.99e-08	3.8e-10	7.00454	12.8738	-1.91896	C21orf2	chromosome 21 open reading frame 2
202580_x_at	6.01e-08	3.82e-10	-7.00333	12.8683	2.80577	FOXM1	forkhead box M1
206101_at	6.05e-08	3.86e-10	7.00129	12.8591	-2.62366	ECM2	extracellular matrix protein 2
211929_at	6.1e-08	3.91e-10	6.99838	12.8461	-1.04693	HNRNPA3	heterogeneous nuclear ribonucleoprotein A3
201127_s_at	6.1e-08	3.92e-10	-6.99807	12.8446	1.367	ACLY	ATP citrate lyase
209648_x_at	6.32e-08	4.07e-10	6.9899	12.8079	-1.22266	SOCS5	suppressor of cytokine signaling 5
1553890_s_at	6.33e-08	4.09e-10	6.98901	12.8038	-2.61066	NTN5	netrin 5
203554_x_at	6.35e-08	4.12e-10	-6.98721	12.7957	2.01647	PTTG1	pituitary tumor-transforming 1
225811_at	6.35e-08	4.12e-10	6.98716	12.7955	-1.07331	C11orf58	chromosome 11 open reading frame 58
201521_s_at	6.62e-08	4.32e-10	-6.97732	12.7512	1.42625	NCBP2	nuclear cap binding protein subunit 2
203693_s_at	6.62e-08	4.32e-10	-6.97714	12.7504	1.48625	E2F3	E2F transcription factor 3
213243_at	6.79e-08	4.45e-10	6.97098	12.7227	-1.00015	VPS13B	vacuolar protein sorting 13 homolog B
227095_at	6.8e-08	4.46e-10	6.97019	12.7192	-1.25603	LEPROT	leptin receptor overlapping transcript
219801_at	6.9e-08	4.55e-10	6.96626	12.7015	-1.2513	ZNF34	zinc finger protein 34
228702_at	6.9e-08	4.55e-10	6.96582	12.6995	-2.31822	LINC-PINT	long intergenic non-protein coding RNA, p53 induced transcript
217202_s_at	6.98e-08	4.63e-10	-6.96226	12.6835	1.66255	GLUL	glutamate-ammonia ligase
215714_s_at	6.98e-08	4.64e-10	-6.96207	12.6826	1.70703	SMARCA4	SWI/SNF related, matrix associated, actin dependent regulator of chromatin, subfamily a, member 4
36936_at	6.99e-08	4.67e-10	-6.96058	12.6759	1.16721	TSTA3	tissue specific transplantation antigen P35B
213025_at	6.99e-08	4.67e-10	6.96052	12.6756	-1.09636	THUMPD1	THUMP domain containing 1
211994_at	7.04e-08	4.72e-10	-6.95841	12.6662	1.38726	WNK1	WNK lysine deficient protein kinase 1
228099_at	7.13e-08	4.78e-10	6.95532	12.6523	-1.14361	ZNF550	zinc finger protein 550
219306_at	7.26e-08	4.89e-10	-6.9508	12.632	2.63552	KIF15	kinesin family member 15
235428_at	7.28e-08	4.91e-10	6.94954	12.6263	-1.54877	MINCR	MYC-induced long noncoding RNA
216321_s_at	7.34e-08	4.96e-10	6.94737	12.6165	-2.06743	NR3C1	nuclear receptor subfamily 3 group C member 1
65472_at	7.43e-08	5.04e-10	6.94394	12.6011	-1.2642	C2orf68	chromosome 2 open reading frame 68
227132_at	7.59e-08	5.16e-10	6.93904	12.5791	-1.4305	ZNF706	zinc finger protein 706
231040_at	7.59e-08	5.18e-10	6.93848	12.5766	-3.58472	RORB	RAR related orphan receptor B
213883_s_at	7.6e-08	5.2e-10	6.93747	12.5721	-1.11923	TM2D1	TM2 domain containing 1
206976_s_at	7.7e-08	5.28e-10	-6.93405	12.5567	1.22624	HSPH1	heat shock protein family H (Hsp110) member 1
218901_at	7.72e-08	5.31e-10	6.93299	12.5519	-2.06431	PLSCR4	phospholipid scramblase 4
209875_s_at	8.06e-08	5.55e-10	-6.9233	12.5084	2.60581	SPP1	secreted phosphoprotein 1
203380_x_at	8.18e-08	5.66e-10	6.91919	12.49	-0.976072	SRSF5	serine and arginine rich splicing factor 5
213122_at	8.18e-08	5.67e-10	6.91884	12.4884	-2.24166	TSPYL5	TSPY like 5
208777_s_at	8.45e-08	5.88e-10	-6.91112	12.4537	1.3306	PSMD11	proteasome 26S subunit, non-ATPase 11
228368_at	8.45e-08	5.89e-10	6.91066	12.4517	-3.13367	ARHGAP20	Rho GTPase activating protein 20
211352_s_at	8.5e-08	5.94e-10	-6.90895	12.444	1.50884	NCOA3	nuclear receptor coactivator 3
211622_s_at	8.5e-08	5.95e-10	-6.90847	12.4418	2.65184	ARF3	ADP ribosylation factor 3
212179_at	8.51e-08	5.97e-10	6.90766	12.4382	-1.45282	PNISR	PNN interacting serine and arginine rich protein
1568768_s_at	8.73e-08	6.15e-10	6.90162	12.4111	-2.06207	BRE-AS1	BRE antisense RNA 1
1553957_at	8.75e-08	6.18e-10	6.90048	12.406	-1.01099	ZNF564	zinc finger protein 564
242607_at	8.75e-08	6.2e-10	6.89986	12.4032	-1.37096
225798_at	8.8e-08	6.24e-10	6.8982	12.3958	-1.71462	JAZF1	JAZF zinc finger 1
204154_at	8.85e-08	6.3e-10	6.89643	12.3878	-2.92608	CDO1	cysteine dioxygenase type 1
229641_at	8.99e-08	6.42e-10	6.89224	12.369	-3.46593	CCBE1	collagen and calcium binding EGF domains 1
243796_at	8.99e-08	6.43e-10	6.89197	12.3679	-1.52602	HEXIM2	hexamethylene bisacetamide inducible 2
218703_at	9.01e-08	6.46e-10	6.89088	12.363	-0.946823	SEC22A	SEC22 homolog A, vesicle trafficking protein
221499_s_at	9.13e-08	6.57e-10	6.88728	12.3468	-1.16982	STX16	syntaxin 16
224580_at	9.13e-08	6.58e-10	-6.88707	12.3459	2.49897	SLC38A1	solute carrier family 38 member 1
218755_at	9.31e-08	6.73e-10	-6.88214	12.3238	2.33917	KIF20A	kinesin family member 20A
203179_at	9.36e-08	6.78e-10	6.88048	12.3163	-1.2344	GALT	galactose-1-phosphate uridylyltransferase
201231_s_at	9.44e-08	6.86e-10	-6.87805	12.3055	2.25603	ENO1	enolase 1
218846_at	9.51e-08	6.93e-10	6.87595	12.296	-0.977445	MED23	mediator complex subunit 23
226497_s_at	9.52e-08	6.96e-10	-6.87481	12.2909	2.05208	FLT1	fms related tyrosine kinase 1
225682_s_at	9.52e-08	7e-10	-6.87364	12.2857	1.55219	POLR3H	RNA polymerase III subunit H
239457_at	9.52e-08	7e-10	6.8735	12.2851	-3.54061	ATP8B3	ATPase phospholipid transporting 8B3
202954_at	9.52e-08	7.01e-10	-6.87335	12.2844	1.87809	UBE2C	ubiquitin conjugating enzyme E2 C
239848_at	9.52e-08	7.01e-10	6.8732	12.2837	-1.58919	EIF3M	eukaryotic translation initiation factor 3 subunit M
225832_s_at	9.52e-08	7.03e-10	-6.87264	12.2812	1.59771	DAGLB	diacylglycerol lipase beta
237315_at	9.68e-08	7.17e-10	6.86836	12.262	-1.8018
204773_at	9.85e-08	7.32e-10	6.86416	12.2433	-2.14843	IL11RA	interleukin 11 receptor subunit alpha
236468_at	1.01e-07	7.52e-10	6.85824	12.2167	-2.23615	TMEM132B	transmembrane protein 132B
236420_s_at	1.03e-07	7.68e-10	6.85378	12.1968	-3.11703	ANO4	anoctamin 4
242292_at	1.06e-07	7.92e-10	6.847	12.1664	-2.97683	FAM226B///FAM226A	family with sequence similarity 226 member B (non-protein coding)///family with sequence similarity 226 member A (non-protein coding)
207108_s_at	1.09e-07	8.18e-10	-6.84023	12.1362	2.10242	NIPBL	NIPBL, cohesin loading factor
210594_x_at	1.09e-07	8.2e-10	-6.83961	12.1334	2.22177	MPZL1	myelin protein zero like 1
201475_x_at	1.1e-07	8.27e-10	-6.83775	12.125	0.904544	MIR6758///MARS	microRNA 6758///methionyl-tRNA synthetase
226074_at	1.1e-07	8.33e-10	6.83609	12.1176	-1.6176	PPM1M	protein phosphatase, Mg2+/Mn2+ dependent 1M
207163_s_at	1.13e-07	8.53e-10	-6.83115	12.0955	1.3225	AKT1	AKT serine/threonine kinase 1
232811_x_at	1.14e-07	8.64e-10	6.82844	12.0834	-1.58785	PRICKLE1	prickle planar cell polarity protein 1
210101_x_at	1.14e-07	8.67e-10	-6.82756	12.0795	1.4559	SH3GLB1	SH3 domain containing GRB2 like endophilin B1
201287_s_at	1.14e-07	8.7e-10	-6.82678	12.076	2.21359	SDC1	syndecan 1
205401_at	1.14e-07	8.71e-10	-6.82658	12.0751	1.38086	AGPS	alkylglycerone phosphate synthase
219069_at	1.16e-07	8.87e-10	6.82271	12.0578	-1.08138	ANKRD49	ankyrin repeat domain 49
204359_at	1.19e-07	9.17e-10	6.81556	12.0258	-2.89688	LOC100506718///FLRT2	uncharacterized LOC100506718///fibronectin leucine rich transmembrane protein 2
231950_at	1.2e-07	9.27e-10	6.81322	12.0154	-1.33265	ZNF658	zinc finger protein 658
239183_at	1.2e-07	9.27e-10	6.81315	12.0151	-4.25306	ANGPTL1	angiopoietin like 1
202005_at	1.2e-07	9.27e-10	-6.81312	12.015	1.64217	ST14	suppression of tumorigenicity 14
1552327_at	1.2e-07	9.29e-10	6.81276	12.0133	-4.19945	ARMCX4	armadillo repeat containing, X-linked 4
215380_s_at	1.2e-07	9.32e-10	-6.81199	12.0099	1.60432	GGCT	gamma-glutamylcyclotransferase
225282_at	1.2e-07	9.35e-10	-6.81122	12.0065	1.32435	SMAP2	small ArfGAP2
212514_x_at	1.2e-07	9.36e-10	-6.81108	12.0058	1.32978	DDX3X	DEAD-box helicase 3, X-linked
205880_at	1.21e-07	9.47e-10	6.80849	11.9943	-2.24669	PRKD1	protein kinase D1
208511_at	1.21e-07	9.49e-10	-6.80808	11.9924	2.18722	PTTG3P	pituitary tumor-transforming 3, pseudogene
215136_s_at	1.22e-07	9.58e-10	6.80613	11.9837	-1.09785	EXOSC8	exosome component 8
208078_s_at	1.23e-07	9.71e-10	6.8032	11.9707	-2.26837	SIK1	salt inducible kinase 1
217621_at	1.24e-07	9.84e-10	6.80038	11.9581	-5.43466	SLC6A2	solute carrier family 6 member 2
227386_s_at	1.25e-07	9.87e-10	6.79973	11.9551	-1.76254	TMEM200B	transmembrane protein 200B
235620_x_at	1.26e-07	1e-09	6.79631	11.9399	-1.19542	ZMYM5	zinc finger MYM-type containing 5
214364_at	1.26e-07	1.01e-09	6.7954	11.9358	-1.6499	MTERF4	mitochondrial transcription termination factor 4
230729_at	1.26e-07	1.01e-09	6.79499	11.934	-1.58377
202719_s_at	1.27e-07	1.01e-09	-6.79434	11.9311	1.58648	TES	testin LIM domain protein
209101_at	1.27e-07	1.01e-09	6.79374	11.9284	-2.48361	CTGF	connective tissue growth factor
207727_s_at	1.27e-07	1.02e-09	6.79211	11.9211	-1.30533	MUTYH	mutY DNA glycosylase
201935_s_at	1.27e-07	1.02e-09	-6.79156	11.9187	1.26449	EIF4G3	eukaryotic translation initiation factor 4 gamma 3
229092_at	1.28e-07	1.04e-09	6.78918	11.9081	-1.51477	NR2F2	nuclear receptor subfamily 2 group F member 2
1558512_at	1.3e-07	1.05e-09	6.78628	11.8951	-1.21031	LOC105369477	uncharacterized LOC105369477
213422_s_at	1.3e-07	1.05e-09	6.78542	11.8913	-1.70836	MXRA8	matrix remodeling associated 8
205647_at	1.33e-07	1.08e-09	6.77984	11.8664	-1.84444	RAD52	RAD52 homolog, DNA repair protein
1557326_at	1.43e-07	1.16e-09	6.76425	11.7969	-3.66787
241689_at	1.44e-07	1.18e-09	6.76133	11.7839	-1.10563	METTL14	methyltransferase like 14
218237_s_at	1.44e-07	1.18e-09	-6.7613	11.7837	2.3955	SLC38A1	solute carrier family 38 member 1
227641_at	1.47e-07	1.21e-09	6.75653	11.7625	-1.95676	FBXL16	F-box and leucine rich repeat protein 16
201543_s_at	1.47e-07	1.21e-09	-6.75633	11.7616	1.25918	SAR1A	secretion associated Ras related GTPase 1A
204955_at	1.48e-07	1.22e-09	6.75436	11.7528	-2.33337	SRPX	sushi repeat containing protein, X-linked
226549_at	1.51e-07	1.25e-09	-6.74944	11.7309	2.02685	SBK1	SH3 domain binding kinase 1
217787_s_at	1.51e-07	1.25e-09	-6.74914	11.7296	2.02798	GALNT2	polypeptide N-acetylgalactosaminyltransferase 2
241395_at	1.51e-07	1.25e-09	6.74865	11.7274	-1.92969	NIT1	nitrilase 1
213464_at	1.53e-07	1.27e-09	6.74497	11.711	-1.90795	SHC2	SHC adaptor protein 2
229430_at	1.53e-07	1.27e-09	6.74494	11.7109	-2.80289	C8orf46	chromosome 8 open reading frame 46
214329_x_at	1.53e-07	1.28e-09	6.74376	11.7056	-2.21812	TNFSF10	tumor necrosis factor superfamily member 10
204423_at	1.57e-07	1.32e-09	-6.73731	11.6769	1.17449	MKLN1	muskelin 1
209803_s_at	1.57e-07	1.32e-09	-6.73716	11.6762	2.87589	PHLDA2	pleckstrin homology like domain family A member 2
239280_at	1.57e-07	1.32e-09	6.73655	11.6735	-2.7357
218663_at	1.59e-07	1.34e-09	-6.73422	11.6631	2.86846	NCAPG	non-SMC condensin I complex subunit G
214093_s_at	1.61e-07	1.36e-09	6.73052	11.6466	-1.37337	FUBP1	far upstream element binding protein 1
209563_x_at	1.62e-07	1.37e-09	-6.72943	11.6418	1.19367	CALM3///CALM2///CALM1	calmodulin 3///calmodulin 2///calmodulin 1
213954_at	1.63e-07	1.38e-09	6.72779	11.6345	-2.53462	FAM169A	family with sequence similarity 169 member A
238566_at	1.66e-07	1.41e-09	6.72289	11.6127	-3.07918	ZNF334	zinc finger protein 334
241808_at	1.66e-07	1.41e-09	6.72241	11.6106	-1.50577	ZC2HC1A	zinc finger C2HC-type containing 1A
214501_s_at	1.67e-07	1.43e-09	-6.71995	11.5996	1.04286	H2AFY	H2A histone family member Y
205006_s_at	1.68e-07	1.43e-09	6.7194	11.5972	-1.59292	NMT2	N-myristoyltransferase 2
222553_x_at	1.69e-07	1.44e-09	6.71767	11.5895	-1.42428	OXR1	oxidation resistance 1
201372_s_at	1.69e-07	1.45e-09	6.71699	11.5865	-2.12538	CUL3	cullin 3
226927_at	1.71e-07	1.47e-09	6.71315	11.5694	-0.932845	C12orf73	chromosome 12 open reading frame 73
222498_at	1.74e-07	1.5e-09	6.70966	11.5539	-1.00877	AZI2	5-azacytidine induced 2
230054_at	1.76e-07	1.52e-09	6.70679	11.5411	-1.76093	LOC100507547///PRRT1	uncharacterized LOC100507547///proline rich transmembrane protein 1
209642_at	1.77e-07	1.53e-09	-6.70497	11.5331	2.32623	BUB1	BUB1 mitotic checkpoint serine/threonine kinase
235587_at	1.78e-07	1.54e-09	6.70288	11.5238	-1.26589	PAXIP1-AS1	PAXIP1 antisense RNA 1 (head to head)
205240_at	1.83e-07	1.59e-09	-6.69699	11.4976	2.65682	GPSM2	G-protein signaling modulator 2
218694_at	1.84e-07	1.6e-09	6.69505	11.489	-2.46777	ARMCX1	armadillo repeat containing, X-linked 1
1554547_at	1.87e-07	1.63e-09	6.6914	11.4727	-2.58941	FAM13C	family with sequence similarity 13 member C
224046_s_at	1.87e-07	1.63e-09	-6.69075	11.4698	1.81132	PDE7A	phosphodiesterase 7A
228033_at	1.87e-07	1.64e-09	-6.69028	11.4678	2.96235	E2F7	E2F transcription factor 7
213018_at	1.88e-07	1.65e-09	6.68841	11.4595	-0.917497	GATAD1	GATA zinc finger domain containing 1
228235_at	1.93e-07	1.69e-09	6.68291	11.435	-2.93694	MIR424///MIR503HG	microRNA 424///MIR503 host gene
226799_at	1.93e-07	1.7e-09	-6.68157	11.4291	1.8674	FGD6	FYVE, RhoGEF and PH domain containing 6
203991_s_at	1.97e-07	1.74e-09	6.67687	11.4082	-1.14914	KDM6A	lysine demethylase 6A
230738_at	1.99e-07	1.76e-09	6.67405	11.3957	-1.69464
200593_s_at	1.99e-07	1.77e-09	-6.67323	11.3921	1.33538	HNRNPU	heterogeneous nuclear ribonucleoprotein U
228282_at	1.99e-07	1.77e-09	6.67308	11.3914	-1.25328	MFSD8	major facilitator superfamily domain containing 8
229762_at	2.03e-07	1.81e-09	6.66866	11.3718	-1.4233
1568648_a_at	2.03e-07	1.81e-09	6.66809	11.3693	-3.72152	LOC100505851	uncharacterized LOC100505851
244677_at	2.07e-07	1.85e-09	6.66395	11.3509	-2.63156	MIR6883///PER1	microRNA 6883///period circadian clock 1
222976_s_at	2.11e-07	1.89e-09	-6.6595	11.3312	0.936913	TPM3	tropomyosin 3
1553971_a_at	2.11e-07	1.9e-09	6.65841	11.3264	-1.52403	GATS	GATS, stromal antigen 3 opposite strand
231952_at	2.13e-07	1.92e-09	6.65577	11.3147	-1.47867
229091_s_at	2.13e-07	1.92e-09	-6.65557	11.3137	1.25334	CCNJ	cyclin J
231062_at	2.15e-07	1.94e-09	6.65309	11.3028	-1.25472	DOCK9-AS2	DOCK9 antisense RNA 2 (head to head)
230010_at	2.17e-07	1.96e-09	6.65084	11.2928	-2.50587	SRRM4	serine/arginine repetitive matrix 4
206364_at	2.19e-07	1.99e-09	-6.64783	11.2794	2.02025	KIF14	kinesin family member 14
222722_at	2.19e-07	1.99e-09	6.64768	11.2788	-5.24141	OGN	osteoglycin
1557945_at	2.2e-07	2e-09	6.64653	11.2737	-1.11962	TCTE3	t-complex-associated-testis-expressed 3
229454_at	2.2e-07	2.01e-09	6.64589	11.2708	-1.60662	BCLAF1	BCL2 associated transcription factor 1
209068_at	2.23e-07	2.04e-09	6.64274	11.2569	-1.41187	HNRNPDL	heterogeneous nuclear ribonucleoprotein D like
212061_at	2.23e-07	2.05e-09	6.64185	11.253	-0.98613	U2SURP	U2 snRNP associated SURP domain containing
241359_at	2.27e-07	2.09e-09	-6.63759	11.2341	1.41676	TLCD2	TLC domain containing 2
212675_s_at	2.27e-07	2.09e-09	6.63697	11.2313	-1.58992	CEP68	centrosomal protein 68
220625_s_at	2.27e-07	2.1e-09	-6.63619	11.2279	4.29063	ELF5	E74 like ETS transcription factor 5
224755_at	2.27e-07	2.1e-09	6.63614	11.2276	-1.30254	TM9SF3	transmembrane 9 superfamily member 3
244116_at	2.3e-07	2.13e-09	6.63349	11.2159	-2.1961	LOC101927391	uncharacterized LOC101927391
201663_s_at	2.31e-07	2.14e-09	-6.63186	11.2087	1.65042	SMC4	structural maintenance of chromosomes 4
228416_at	2.33e-07	2.17e-09	6.62932	11.1975	-1.48116	ACVR2A	activin A receptor type 2A
227919_at	2.36e-07	2.19e-09	6.62676	11.1861	-3.2288	UCA1	urothelial cancer associated 1 (non-protein coding)
202672_s_at	2.36e-07	2.2e-09	6.62608	11.1831	-2.53541	ATF3	activating transcription factor 3
37986_at	2.36e-07	2.21e-09	6.62534	11.1799	-1.84969	EPOR	erythropoietin receptor
227165_at	2.41e-07	2.25e-09	-6.62101	11.1607	1.62416	SKA3	spindle and kinetochore associated complex subunit 3
213931_at	2.43e-07	2.29e-09	6.6177	11.1461	-2.33845	ID2B///ID2	inhibitor of DNA binding 2B, HLH protein (pseudogene)///inhibitor of DNA binding 2, HLH protein
209091_s_at	2.43e-07	2.29e-09	-6.61758	11.1455	1.37233	SH3GLB1	SH3 domain containing GRB2 like endophilin B1
240137_at	2.43e-07	2.29e-09	6.61748	11.1451	-3.73406
207943_x_at	2.47e-07	2.33e-09	6.61388	11.1291	-1.97555	PLAGL1	PLAG1 like zinc finger 1
218419_s_at	2.49e-07	2.36e-09	6.61131	11.1178	-0.913033	TMUB2	transmembrane and ubiquitin like domain containing 2
1556306_at	2.5e-07	2.37e-09	6.6099	11.1115	-1.90232
221745_at	2.52e-07	2.39e-09	-6.60788	11.1026	1.13002	DCAF7	DDB1 and CUL4 associated factor 7
214481_at	2.56e-07	2.43e-09	-6.60442	11.0873	2.36047	HIST1H2AM	histone cluster 1, H2am
233124_s_at	2.56e-07	2.44e-09	-6.60378	11.0845	1.47172	ECHDC1	ethylmalonyl-CoA decarboxylase 1
201138_s_at	2.56e-07	2.45e-09	-6.60275	11.0799	1.11818	SSB	Sjogren syndrome antigen B
226751_at	2.56e-07	2.45e-09	6.60245	11.0786	-1.86269	CNRIP1	cannabinoid receptor interacting protein 1
214163_at	2.59e-07	2.48e-09	6.60013	11.0683	-1.70187	HSPB11	heat shock protein family B (small) member 11
229069_at	2.59e-07	2.48e-09	6.59981	11.0669	-1.10049	SARNP	SAP domain containing ribonucleoprotein
202705_at	2.61e-07	2.51e-09	-6.59761	11.0572	2.44843	CCNB2	cyclin B2
238098_at	2.65e-07	2.56e-09	6.59338	11.0385	-1.74986
223700_at	2.69e-07	2.6e-09	-6.59006	11.0238	2.74623	MND1	meiotic nuclear divisions 1
228326_at	2.69e-07	2.6e-09	6.58954	11.0215	-2.15403	WDR27	WD repeat domain 27
1553960_at	2.77e-07	2.68e-09	6.58306	10.9929	-1.22707	SNX21	sorting nexin family member 21
1556822_s_at	2.8e-07	2.72e-09	6.57999	10.9793	-2.8325	ZNF837	zinc finger protein 837
244780_at	2.82e-07	2.74e-09	-6.5782	10.9715	2.1172	SGPP2	sphingosine-1-phosphate phosphatase 2
229804_x_at	2.84e-07	2.77e-09	6.57565	10.9602	-1.07323	CBWD7///CBWD6///CBWD3///CBWD5///CBWD2///CBWD1	COBW domain containing 7///COBW domain containing 6///COBW domain containing 3///COBW domain containing 5///COBW domain containing 2///COBW domain containing 1
242380_at	2.84e-07	2.78e-09	6.57548	10.9594	-1.25348
227719_at	2.9e-07	2.84e-09	6.57069	10.9383	-2.74505	SMAD9	SMAD family member 9
224773_at	2.92e-07	2.86e-09	-6.56866	10.9293	2.59701	NAV1	neuron navigator 1
227584_at	2.92e-07	2.88e-09	-6.56727	10.9232	2.09294	NAV1	neuron navigator 1
231013_at	2.92e-07	2.88e-09	6.56723	10.923	-2.40446
236824_at	2.92e-07	2.89e-09	6.56692	10.9216	-3.13853	TMEM132B	transmembrane protein 132B
214728_x_at	2.92e-07	2.89e-09	-6.56687	10.9214	1.15035	SMARCA4	SWI/SNF related, matrix associated, actin dependent regulator of chromatin, subfamily a, member 4
209172_s_at	2.96e-07	2.93e-09	-6.56401	10.9088	2.37292	CENPF	centromere protein F
223729_at	2.96e-07	2.93e-09	6.56368	10.9074	-1.7655	CECR2	CECR2, histone acetyl-lysine reader
223518_at	3e-07	2.98e-09	-6.56013	10.8917	1.12144	DFFA	DNA fragmentation factor subunit alpha
238078_at	3e-07	2.98e-09	6.55976	10.89	-1.08167	SEC22A	SEC22 homolog A, vesicle trafficking protein
224849_at	3.08e-07	3.07e-09	6.55325	10.8614	-1.13584	TTC17	tetratricopeptide repeat domain 17
224615_x_at	3.08e-07	3.08e-09	-6.55307	10.8605	1.18575	HM13	histocompatibility minor 13
218349_s_at	3.1e-07	3.1e-09	-6.55162	10.8541	2.33202	ZWILCH	zwilch kinetochore protein
212354_at	3.13e-07	3.14e-09	-6.54873	10.8414	2.35835	SULF1	sulfatase 1
222430_s_at	3.14e-07	3.16e-09	-6.5476	10.8364	1.01964	YTHDF2	YTH N6-methyladenosine RNA binding protein 2
201644_at	3.15e-07	3.17e-09	-6.54635	10.8309	1.24244	TSTA3	tissue specific transplantation antigen P35B
214442_s_at	3.17e-07	3.2e-09	-6.54477	10.824	1.26334	PIAS2	protein inhibitor of activated STAT 2
227026_at	3.21e-07	3.24e-09	6.54155	10.8097	-1.03968	MPHOSPH8	M-phase phosphoprotein 8
57588_at	3.23e-07	3.27e-09	6.53985	10.8023	-2.36849	SLC24A3	solute carrier family 24 member 3
221821_s_at	3.32e-07	3.36e-09	6.5336	10.7747	-0.965282	KANSL2	KAT8 regulatory NSL complex subunit 2
215095_at	3.36e-07	3.41e-09	6.53033	10.7603	-1.85927	ESD	esterase D
226753_at	3.36e-07	3.42e-09	6.53025	10.76	-1.01514	FAM76B	family with sequence similarity 76 member B
210306_at	3.37e-07	3.43e-09	6.52924	10.7555	-1.6212	L3MBTL1	l(3)mbt-like 1 (Drosophila)
204558_at	3.49e-07	3.56e-09	-6.52128	10.7205	2.1446	RAD54L	RAD54-like (S. cerevisiae)
221621_at	3.49e-07	3.57e-09	6.5207	10.7179	-1.05105	MIR6516///SCARNA16///SNHG20	microRNA 6516///small Cajal body-specific RNA 16///small nucleolar RNA host gene 20
200637_s_at	3.52e-07	3.6e-09	-6.51877	10.7094	2.00714	PTPRF	protein tyrosine phosphatase, receptor type F
226096_at	3.52e-07	3.61e-09	6.51811	10.7065	-3.03979	FNDC5	fibronectin type III domain containing 5
1554390_s_at	3.52e-07	3.62e-09	-6.51764	10.7045	1.60612	ACTR2	ARP2 actin related protein 2 homolog
1552378_s_at	3.52e-07	3.63e-09	-6.51723	10.7027	2.60352	RDH10	retinol dehydrogenase 10 (all-trans)
238458_at	3.52e-07	3.63e-09	6.51686	10.701	-3.28242	MICU3	mitochondrial calcium uptake family member 3
209008_x_at	3.54e-07	3.66e-09	-6.51509	10.6933	1.99444	KRT8	keratin 8
225527_at	3.55e-07	3.67e-09	-6.51457	10.691	1.13312	CEBPG	CCAAT/enhancer binding protein gamma
231260_at	3.58e-07	3.71e-09	6.51211	10.6801	-3.38766	ZNF582-AS1	ZNF582 antisense RNA 1 (head to head)
221922_at	3.58e-07	3.72e-09	-6.51161	10.6779	1.69357	GPSM2	G-protein signaling modulator 2
202451_at	3.58e-07	3.72e-09	6.51143	10.6771	-0.737955	GTF2H1	general transcription factor IIH subunit 1
205585_at	3.66e-07	3.82e-09	-6.50602	10.6533	1.41278	ETV6	ETS variant 6
219493_at	3.74e-07	3.91e-09	-6.50097	10.6311	2.15742	SHCBP1	SHC binding and spindle associated 1
231925_at	3.74e-07	3.92e-09	6.50039	10.6286	-2.2846	P2RY1	purinergic receptor P2Y1
229833_at	3.9e-07	4.08e-09	6.49121	10.5882	-1.34594	ALOX12-AS1	ALOX12 antisense RNA 1
1555326_a_at	3.92e-07	4.12e-09	-6.48931	10.5799	2.39277	ADAM9	ADAM metallopeptidase domain 9
227685_at	3.94e-07	4.15e-09	6.48796	10.5739	-0.913242	TMF1	TATA element modulatory factor 1
235155_at	3.98e-07	4.19e-09	6.48536	10.5625	-1.49504	BDH2	3-hydroxybutyrate dehydrogenase, type 2
223991_s_at	4.08e-07	4.31e-09	-6.47961	10.5372	1.30425	GALNT2	polypeptide N-acetylgalactosaminyltransferase 2
222981_s_at	4.09e-07	4.32e-09	-6.47881	10.5337	1.16414	RAB10	RAB10, member RAS oncogene family
224461_s_at	4.17e-07	4.41e-09	-6.47416	10.5133	2.53142	AIFM2	apoptosis inducing factor, mitochondria associated 2
211924_s_at	4.2e-07	4.46e-09	-6.47213	10.5044	2.48449	PLAUR	plasminogen activator, urokinase receptor
237334_at	4.21e-07	4.47e-09	6.47123	10.5005	-1.7177	SFXN2	sideroflexin 2
213701_at	4.25e-07	4.52e-09	6.46893	10.4904	-1.22466	C12orf29	chromosome 12 open reading frame 29
201340_s_at	4.28e-07	4.56e-09	-6.46704	10.4821	2.1048	ENC1	ectodermal-neural cortex 1
226521_s_at	4.29e-07	4.58e-09	6.46623	10.4785	-1.42042	FAM175A	family with sequence similarity 175 member A
209514_s_at	4.29e-07	4.59e-09	-6.46575	10.4764	1.27856	RAB27A	RAB27A, member RAS oncogene family
228831_s_at	4.31e-07	4.62e-09	6.4642	10.4696	-1.47459	GNG7	G protein subunit gamma 7
200968_s_at	4.31e-07	4.64e-09	-6.46344	10.4663	1.55944	PPIB	peptidylprolyl isomerase B
212462_at	4.31e-07	4.64e-09	6.46336	10.4659	-0.938027	KAT6B	lysine acetyltransferase 6B
242028_at	4.35e-07	4.69e-09	6.46093	10.4553	-1.20752	ZNF709	zinc finger protein 709
1555522_s_at	4.37e-07	4.71e-09	-6.45987	10.4506	1.14688	DPY30///MEMO1	dpy-30, histone methyltransferase complex regulatory subunit///mediator of cell motility 1
205483_s_at	4.37e-07	4.73e-09	-6.45914	10.4474	2.4266	ISG15	ISG15 ubiquitin-like modifier
243952_at	4.41e-07	4.77e-09	6.45718	10.4388	-2.88461	TPTEP1	transmembrane phosphatase with tensin homology pseudogene 1
222680_s_at	4.52e-07	4.91e-09	-6.45106	10.412	1.81465	DTL	denticleless E3 ubiquitin protein ligase homolog
234307_s_at	4.53e-07	4.92e-09	6.45052	10.4096	-2.53626	KIF26A	kinesin family member 26A
203984_s_at	4.64e-07	5.05e-09	6.44467	10.384	-1.16776	CASP9	caspase 9
202746_at	4.65e-07	5.09e-09	6.4428	10.3758	-2.12599	ITM2A	integral membrane protein 2A
214252_s_at	4.65e-07	5.1e-09	6.44271	10.3754	-1.17519	CLN5	ceroid-lipofuscinosis, neuronal 5
231113_at	4.65e-07	5.1e-09	6.44259	10.3748	-2.55193
230350_at	4.65e-07	5.1e-09	6.44255	10.3747	-1.05102	TIAL1	TIA1 cytotoxic granule-associated RNA binding protein-like 1
212445_s_at	4.66e-07	5.12e-09	-6.44167	10.3708	1.89219	NEDD4L	neural precursor cell expressed, developmentally down-regulated 4-like, E3 ubiquitin protein ligase
219304_s_at	4.66e-07	5.12e-09	6.44159	10.3704	-2.04219	PDGFD	platelet derived growth factor D
219871_at	4.75e-07	5.23e-09	6.43693	10.35	-2.92017	KLF3-AS1	KLF3 antisense RNA 1
218294_s_at	4.79e-07	5.29e-09	-6.43463	10.3399	1.22796	NUP50	nucleoporin 50
218730_s_at	4.83e-07	5.34e-09	6.43258	10.331	-4.3015	OGN	osteoglycin
235759_at	4.87e-07	5.39e-09	6.43046	10.3217	-1.78441
1558586_at	4.87e-07	5.39e-09	6.43027	10.3208	-1.40644	ZNF33B	zinc finger protein 33B
213218_at	4.9e-07	5.43e-09	6.42858	10.3134	-1.10113	ZSCAN26	zinc finger and SCAN domain containing 26
204759_at	5.05e-07	5.61e-09	6.42142	10.2821	-1.77334	RCBTB2	RCC1 and BTB domain containing protein 2
213627_at	5.08e-07	5.66e-09	6.41966	10.2744	-1.15773	MAGED2	MAGE family member D2
219130_at	5.17e-07	5.76e-09	6.41569	10.257	-1.01406	TRMT13	tRNA methyltransferase 13 homolog
215715_at	5.22e-07	5.84e-09	6.41294	10.245	-5.05787	SLC6A2	solute carrier family 6 member 2
206093_x_at	5.25e-07	5.88e-09	6.41138	10.2382	-2.53019	TNXB///TNXA	tenascin XB///tenascin XA (pseudogene)
226361_at	5.34e-07	5.98e-09	6.40747	10.2211	-0.868847	TMEM42	transmembrane protein 42
201183_s_at	5.39e-07	6.05e-09	-6.40493	10.21	1.37206	CHD4	chromodomain helicase DNA binding protein 4
229757_at	5.48e-07	6.16e-09	6.40103	10.1929	-0.885965
216333_x_at	5.51e-07	6.21e-09	6.39943	10.1859	-2.51075	TNXB///TNXA	tenascin XB///tenascin XA (pseudogene)
32259_at	5.51e-07	6.22e-09	6.39886	10.1834	-1.09697	EZH1	enhancer of zeste 1 polycomb repressive complex 2 subunit
231960_at	5.56e-07	6.29e-09	6.39646	10.1729	-1.06713	BRWD1	bromodomain and WD repeat domain containing 1
221497_x_at	5.6e-07	6.34e-09	-6.39473	10.1654	1.22447	EGLN1	egl-9 family hypoxia inducible factor 1
217816_s_at	5.62e-07	6.37e-09	6.39375	10.1611	-1.34862	PCNP	PEST proteolytic signal containing nuclear protein
222563_s_at	5.66e-07	6.43e-09	-6.39159	10.1517	1.71277	TNKS2	tankyrase 2
204132_s_at	5.72e-07	6.51e-09	-6.38884	10.1396	1.24918	FOXO3B///FOXO3	forkhead box O3B pseudogene///forkhead box O3
1558795_at	5.76e-07	6.56e-09	6.38709	10.132	-2.97375	LOC101928307	uncharacterized LOC101928307
202120_x_at	5.76e-07	6.58e-09	-6.38664	10.13	0.977009	AP2S1	adaptor related protein complex 2 sigma 1 subunit
200727_s_at	5.85e-07	6.69e-09	-6.38283	10.1134	1.7261	ACTR2	ARP2 actin related protein 2 homolog
218662_s_at	5.85e-07	6.69e-09	-6.3828	10.1132	2.42251	NCAPG	non-SMC condensin I complex subunit G
209882_at	5.97e-07	6.84e-09	-6.37793	10.092	1.76714	RIT1	Ras like without CAAX 1
204408_at	5.97e-07	6.86e-09	-6.37749	10.0901	1.40447	APEX2	apurinic/apyrimidinic endodeoxyribonuclease 2
201761_at	6.09e-07	7.02e-09	-6.37231	10.0674	1.70328	MTHFD2	methylenetetrahydrofolate dehydrogenase (NADP+ dependent) 2, methenyltetrahydrofolate cyclohydrolase
227543_at	6.09e-07	7.03e-09	6.37194	10.0658	-1.26361	RNASEH2C	ribonuclease H2 subunit C
228960_at	6.09e-07	7.03e-09	6.37188	10.0656	-1.13968	ICE2	interactor of little elongation complex ELL subunit 2
232038_at	6.15e-07	7.11e-09	6.36953	10.0553	-1.48593	TBC1D32	TBC1 domain family member 32
202760_s_at	6.15e-07	7.12e-09	-6.36924	10.054	2.07133	PALM2-AKAP2///AKAP2	PALM2-AKAP2 readthrough///A-kinase anchoring protein 2
229418_at	6.19e-07	7.18e-09	-6.36742	10.0461	1.15631	FAM222B	family with sequence similarity 222 member B
227351_at	6.37e-07	7.4e-09	6.36075	10.017	-1.42825	LOC101930115///C16orf52///VWA3A	von Willebrand factor A domain-containing protein 3A///chromosome 16 open reading frame 52///von Willebrand factor A domain containing 3A
201768_s_at	6.41e-07	7.46e-09	-6.35905	10.0096	1.00427	CLINT1	clathrin interactor 1
208606_s_at	6.41e-07	7.47e-09	6.35851	10.0072	-3.23875	WNT4	Wnt family member 4
230721_at	6.43e-07	7.5e-09	6.35771	10.0037	-1.23717	LOC101930115///C16orf52///VWA3A	von Willebrand factor A domain-containing protein 3A///chromosome 16 open reading frame 52///von Willebrand factor A domain containing 3A
208394_x_at	6.5e-07	7.59e-09	-6.35499	9.99188	2.27149	ESM1	endothelial cell specific molecule 1
211085_s_at	6.51e-07	7.62e-09	-6.35428	9.98877	2.41919	STK4	serine/threonine kinase 4
221769_at	6.51e-07	7.64e-09	6.35376	9.98652	-1.5598	SPSB3	splA/ryanodine receptor domain and SOCS box containing 3
219550_at	6.52e-07	7.65e-09	6.35326	9.98431	-2.88343	ROBO3	roundabout guidance receptor 3
204691_x_at	6.54e-07	7.69e-09	6.35214	9.97943	-1.20135	PLA2G6	phospholipase A2 group VI
210312_s_at	6.6e-07	7.78e-09	6.34969	9.96876	-0.874074	IFT20	intraflagellar transport 20
232682_at	6.62e-07	7.81e-09	-6.34884	9.96505	1.4247	MREG	melanoregulin
223257_at	6.63e-07	7.83e-09	6.34818	9.96217	-1.18601	G2E3	G2/M-phase specific E3 ubiquitin protein ligase
201418_s_at	6.71e-07	7.94e-09	-6.34503	9.94843	1.21391	SOX4	SRY-box 4
207239_s_at	6.72e-07	7.96e-09	-6.34464	9.94676	0.929234	CDK16	cyclin dependent kinase 16
214046_at	6.73e-07	8e-09	6.34353	9.94193	-4.1622	FUT9	fucosyltransferase 9
226030_at	6.73e-07	8e-09	6.34349	9.94173	-1.19661	ACADSB	acyl-CoA dehydrogenase, short/branched chain
234340_at	6.85e-07	8.15e-09	6.33938	9.92383	-2.05987
228721_at	6.87e-07	8.19e-09	6.3384	9.91958	-1.38924	KRBOX1	KRAB box domain containing 1
230274_s_at	6.91e-07	8.25e-09	6.33678	9.9125	-1.24169
226844_at	6.93e-07	8.29e-09	6.3357	9.90779	-1.53165	MOB3B	MOB kinase activator 3B
232794_at	6.99e-07	8.37e-09	6.33344	9.89797	-1.54829	LOC153682	uncharacterized LOC153682
200744_s_at	7.03e-07	8.44e-09	-6.33168	9.89031	1.31929	GNB1	G protein subunit beta 1
1569303_s_at	7.04e-07	8.45e-09	6.33131	9.88869	-2.05475	RGS20	regulator of G-protein signaling 20
204875_s_at	7.04e-07	8.47e-09	-6.33099	9.88729	2.39779	GMDS	GDP-mannose 4,6-dehydratase
235764_at	7.04e-07	8.49e-09	6.33036	9.88457	-2.50028	PRDM5	PR/SET domain 5
200734_s_at	7.1e-07	8.57e-09	-6.32818	9.87507	1.38735	ARF3	ADP ribosylation factor 3
202397_at	7.21e-07	8.74e-09	-6.32399	9.8568	0.888264	NUTF2P4///NUTF2	nuclear transport factor 2 pseudogene 4///nuclear transport factor 2
237753_at	7.21e-07	8.74e-09	-6.32392	9.85651	2.30321	IL21R	interleukin 21 receptor
204254_s_at	7.21e-07	8.75e-09	-6.3238	9.85601	2.02028	VDR	vitamin D (1,25- dihydroxyvitamin D3) receptor
226165_at	7.23e-07	8.77e-09	6.3231	9.85295	-0.90097	C8orf59	chromosome 8 open reading frame 59
208684_at	7.23e-07	8.81e-09	-6.32222	9.8491	1.32934	COPA	coatomer protein complex subunit alpha
205329_s_at	7.23e-07	8.81e-09	-6.32219	9.84898	1.57675	SNX4	sorting nexin 4
223393_s_at	7.24e-07	8.83e-09	6.32172	9.84692	-2.3792	TSHZ3	teashirt zinc finger homeobox 3
1554452_a_at	7.36e-07	8.99e-09	-6.31765	9.82922	2.2266	HILPDA	hypoxia inducible lipid droplet associated
208679_s_at	7.46e-07	9.12e-09	-6.31449	9.81548	1.54003	ARPC2	actin related protein 2/3 complex subunit 2
212933_x_at	7.46e-07	9.14e-09	6.31418	9.81414	-0.925768	SNORD68///RPL13	small nucleolar RNA, C/D box 68///ribosomal protein L13
208970_s_at	7.48e-07	9.18e-09	6.31308	9.80934	-0.878501	UROD	uroporphyrinogen decarboxylase
203763_at	7.52e-07	9.24e-09	6.3116	9.80291	-1.09854	DYNC2LI1	dynein cytoplasmic 2 light intermediate chain 1
201888_s_at	7.55e-07	9.29e-09	-6.31039	9.79767	1.48308	IL13RA1	interleukin 13 receptor subunit alpha 1
241739_at	7.6e-07	9.37e-09	6.3086	9.78986	-1.57417	OGFOD1	2-oxoglutarate and iron dependent oxygenase domain containing 1
243957_at	7.61e-07	9.4e-09	6.30794	9.78699	-2.37303	LOC100128108	putative ubiquitin-conjugating enzyme E2Q2-like protein
209737_at	7.81e-07	9.66e-09	6.30176	9.76012	-1.5422	MAGI2	membrane associated guanylate kinase, WW and PDZ domain containing 2
238646_at	7.81e-07	9.68e-09	6.30139	9.7585	-1.3687
214598_at	7.81e-07	9.68e-09	6.30138	9.75847	-3.3385	CLDN8	claudin 8
238094_at	7.84e-07	9.74e-09	6.30002	9.75259	-2.87145	LOC101928728	uncharacterized LOC101928728
215283_at	7.9e-07	9.82e-09	6.29816	9.74447	-1.93767	LINC00667	long intergenic non-protein coding RNA 667
201540_at	7.9e-07	9.84e-09	6.29774	9.74267	-2.33937	FHL1	four and a half LIM domains 1
214238_at	7.92e-07	9.87e-09	6.297	9.73944	-1.92153	GDF7	growth differentiation factor 7
226151_x_at	8.02e-07	1e-08	6.29383	9.72568	-0.845004	CRYZL1	crystallin zeta like 1
203922_s_at	8.03e-07	1.01e-08	-6.29307	9.72236	1.85219	CYBB	cytochrome b-245 beta chain
215111_s_at	8.03e-07	1.01e-08	6.29273	9.7209	-1.26932	TSC22D1	TSC22 domain family member 1
1555427_s_at	8.03e-07	1.01e-08	-6.29244	9.71963	1.81332	SYNCRIP	synaptotagmin binding cytoplasmic RNA interacting protein
227793_at	8.12e-07	1.02e-08	6.28989	9.70854	-1.63887	MIRLET7D	microRNA let-7d
217496_s_at	8.13e-07	1.02e-08	-6.28919	9.70553	1.19927	IDE	insulin degrading enzyme
51146_at	8.23e-07	1.04e-08	6.28607	9.69196	-0.913582	PIGV	phosphatidylinositol glycan anchor biosynthesis class V
1555847_a_at	8.44e-07	1.07e-08	6.27997	9.6655	-1.84825	MIR24-2///MIR23A///LOC284454	microRNA 24-2///microRNA 23a///uncharacterized LOC284454
219659_at	8.44e-07	1.07e-08	6.2798	9.66474	-2.88749	ATP8A2	ATPase phospholipid transporting 8A2
228273_at	8.45e-07	1.07e-08	-6.27927	9.66247	2.14136	PRR11	proline rich 11
228519_x_at	8.47e-07	1.07e-08	6.27856	9.65936	-1.58242	CIRBP	cold inducible RNA binding protein
228160_at	8.5e-07	1.08e-08	6.27749	9.65471	-2.62573	LINC00667	long intergenic non-protein coding RNA 667
200628_s_at	8.58e-07	1.09e-08	-6.27508	9.64426	2.82818	WARS	tryptophanyl-tRNA synthetase
209053_s_at	8.67e-07	1.1e-08	-6.27242	9.63272	1.38508	WHSC1	Wolf-Hirschhorn syndrome candidate 1
236994_at	8.67e-07	1.1e-08	6.27211	9.63138	-1.27668	FBXL4	F-box and leucine rich repeat protein 4
200604_s_at	8.71e-07	1.11e-08	-6.27071	9.62529	1.65494	PRKAR1A	protein kinase cAMP-dependent type I regulatory subunit alpha
230589_at	8.78e-07	1.12e-08	6.26871	9.61661	-3.28665	TRAF3IP2-AS1	TRAF3IP2 antisense RNA 1
203657_s_at	8.81e-07	1.13e-08	6.26747	9.61124	-2.36231	CTSF	cathepsin F
1556328_at	8.9e-07	1.14e-08	6.26503	9.60068	-3.39858	PCDH10	protocadherin 10
228080_at	8.94e-07	1.15e-08	6.26359	9.5944	-1.40303	LAYN	layilin
AFFX-HUMISGF3A/M97935_MA_at	8.95e-07	1.15e-08	-6.26318	9.59265	2.30986	STAT1	signal transducer and activator of transcription 1
219310_at	8.96e-07	1.15e-08	6.26249	9.58966	-2.19503	SYNDIG1	synapse differentiation inducing 1
200828_s_at	9.04e-07	1.17e-08	-6.26033	9.58027	1.02723	ZNF207	zinc finger protein 207
235796_at	9.14e-07	1.18e-08	6.2575	9.56801	-1.3484
235511_at	9.15e-07	1.18e-08	6.25697	9.56574	-1.37622	RBM14-RBM4///RBM4	RBM14-RBM4 readthrough///RNA binding motif protein 4
224763_at	9.48e-07	1.23e-08	6.24885	9.53055	-1.43556	LOC100506548///RPL37	uncharacterized LOC100506548///ribosomal protein L37
206752_s_at	9.49e-07	1.23e-08	6.24816	9.52753	-1.13875	DFFB	DNA fragmentation factor subunit beta
201954_at	9.49e-07	1.23e-08	-6.24785	9.5262	1.42792	ARPC1B	actin related protein 2/3 complex subunit 1B
209744_x_at	9.49e-07	1.23e-08	-6.24756	9.52492	1.08221	ITCH	itchy E3 ubiquitin protein ligase
219470_x_at	9.52e-07	1.24e-08	-6.24672	9.5213	1.2633	CCNJ	cyclin J
232570_s_at	9.58e-07	1.25e-08	6.24483	9.51312	-2.93968	ADAM33	ADAM metallopeptidase domain 33
238483_at	9.63e-07	1.26e-08	6.24338	9.50685	-1.5851	SSBP2	single stranded DNA binding protein 2
227500_at	9.64e-07	1.26e-08	-6.2429	9.50476	1.85988	FBXL18	F-box and leucine rich repeat protein 18
206348_s_at	9.65e-07	1.26e-08	-6.24217	9.50162	2.89346	PDK3	pyruvate dehydrogenase kinase 3
225687_at	9.65e-07	1.27e-08	-6.24206	9.5011	2.49566	FAM83D	family with sequence similarity 83 member D
238587_at	9.81e-07	1.29e-08	-6.2379	9.4831	2.15267	UBASH3B	ubiquitin associated and SH3 domain containing B
1555543_a_at	9.81e-07	1.29e-08	-6.2378	9.48269	2.21727	CLCC1	chloride channel CLIC like 1
235003_at	9.85e-07	1.3e-08	-6.23655	9.47725	1.68853	UHMK1	U2AF homology motif (UHM) kinase 1
202128_at	9.96e-07	1.31e-08	-6.23371	9.46496	0.922227	AREL1	apoptosis resistant E3 ubiquitin protein ligase 1
205552_s_at	1.01e-06	1.34e-08	-6.22919	9.44541	2.88011	OAS1	2'-5'-oligoadenylate synthetase 1
1552618_at	1.01e-06	1.34e-08	-6.22917	9.44531	1.39246	STX6	syntaxin 6
226140_s_at	1.01e-06	1.34e-08	6.22908	9.44496	-1.79155	OTUD1	OTU deubiquitinase 1
203690_at	1.02e-06	1.35e-08	6.22803	9.44041	-1.00443	TUBGCP3	tubulin gamma complex associated protein 3
219421_at	1.02e-06	1.35e-08	6.22729	9.43719	-1.18609	TTC33	tetratricopeptide repeat domain 33
204444_at	1.02e-06	1.35e-08	-6.22706	9.43619	2.23024	KIF11	kinesin family member 11
213195_at	1.02e-06	1.36e-08	6.22666	9.43445	-1.25441	LYRM9	LYR motif containing 9
205198_s_at	1.03e-06	1.37e-08	6.22363	9.42135	-1.00056	ATP7A	ATPase copper transporting alpha
201531_at	1.04e-06	1.39e-08	6.22133	9.41142	-1.65807	ZFP36	ZFP36 ring finger protein
219291_at	1.04e-06	1.4e-08	6.22029	9.40691	-1.08809	DTWD1	DTW domain containing 1
226355_at	1.05e-06	1.4e-08	-6.21976	9.40461	1.33719	POC1A	POC1 centriolar protein A
212023_s_at	1.05e-06	1.4e-08	-6.21932	9.4027	2.32386	MKI67	marker of proliferation Ki-67
225468_at	1.06e-06	1.42e-08	-6.21698	9.39261	1.39305	PATL1	PAT1 homolog 1, processing body mRNA decay factor
244289_at	1.06e-06	1.43e-08	6.21495	9.38383	-2.73706	ZNF300P1	zinc finger protein 300 pseudogene 1
222458_s_at	1.07e-06	1.44e-08	-6.21334	9.37688	2.22858	AKIRIN1	akirin 1
215054_at	1.07e-06	1.44e-08	6.21286	9.3748	-1.94041	RGL3///EPOR	ral guanine nucleotide dissociation stimulator like 3///erythropoietin receptor
221014_s_at	1.07e-06	1.45e-08	6.21258	9.37357	-1.22749	RAB33B	RAB33B, member RAS oncogene family
207826_s_at	1.07e-06	1.45e-08	6.21169	9.36972	-2.83374	ID3	inhibitor of DNA binding 3, HLH protein
223007_s_at	1.1e-06	1.49e-08	6.20561	9.34345	-1.20094	TMEM245	transmembrane protein 245
229850_at	1.12e-06	1.51e-08	6.20211	9.32834	-1.30576	KDSR	3-ketodihydrosphingosine reductase
202784_s_at	1.12e-06	1.53e-08	-6.2004	9.32094	1.29026	NNT	nicotinamide nucleotide transhydrogenase
212779_at	1.12e-06	1.53e-08	6.20038	9.32088	-0.900583	KIAA1109	KIAA1109
224772_at	1.13e-06	1.54e-08	-6.19891	9.31451	1.40785	NAV1	neuron navigator 1
206637_at	1.14e-06	1.55e-08	6.19744	9.30816	-2.46658	P2RY14	purinergic receptor P2Y14
238633_at	1.14e-06	1.55e-08	6.19685	9.30563	-1.37161	EPC1	enhancer of polycomb homolog 1
208952_s_at	1.14e-06	1.56e-08	-6.19583	9.30123	0.86901	LARP4B	La ribonucleoprotein domain family member 4B
225750_at	1.14e-06	1.56e-08	-6.1952	9.29852	1.70199	ERO1A	endoplasmic reticulum oxidoreductase 1 alpha
201914_s_at	1.14e-06	1.57e-08	-6.19464	9.29608	1.16439	SEC63	SEC63 homolog, protein translocation regulator
238439_at	1.14e-06	1.57e-08	-6.19456	9.29576	2.57177	ANKRD22	ankyrin repeat domain 22
237247_at	1.15e-06	1.58e-08	6.19343	9.29085	-2.22393	USP51	ubiquitin specific peptidase 51
211981_at	1.15e-06	1.58e-08	-6.1933	9.29032	2.15748	COL4A1	collagen type IV alpha 1 chain
208658_at	1.15e-06	1.58e-08	-6.19303	9.28914	1.1676	PDIA4	protein disulfide isomerase family A member 4
223433_at	1.15e-06	1.58e-08	6.19253	9.28699	-0.812888	YAE1D1	Yae1 domain containing 1
203046_s_at	1.16e-06	1.61e-08	-6.18907	9.27205	1.17805	TIMELESS	timeless circadian clock
209291_at	1.18e-06	1.63e-08	6.18579	9.25788	-2.01628	ID4	inhibitor of DNA binding 4, HLH protein
226104_at	1.18e-06	1.63e-08	6.18566	9.25734	-0.842723	RNF170	ring finger protein 170
226498_at	1.19e-06	1.65e-08	-6.18248	9.24361	3.05321	FLT1	fms related tyrosine kinase 1
1554741_s_at	1.19e-06	1.66e-08	6.18207	9.24186	-1.9759	FGF7P3///FGF7P6///FGF7	fibroblast growth factor 7 pseudogene 3///fibroblast growth factor 7 pseudogene 6///fibroblast growth factor 7
202532_s_at	1.19e-06	1.66e-08	-6.18179	9.24063	1.24865	DHFR	dihydrofolate reductase
212427_at	1.19e-06	1.66e-08	6.18163	9.23994	-1.18596	KIAA0368	KIAA0368
241730_at	1.2e-06	1.67e-08	6.18051	9.2351	-1.39599	MYNN	myoneurin
222578_s_at	1.2e-06	1.67e-08	-6.17982	9.23214	0.960295	UBA5	ubiquitin like modifier activating enzyme 5
227909_at	1.2e-06	1.68e-08	6.1792	9.22945	-2.12564	SMIM10L2B///SMIM10L2A	small integral membrane protein 10 like 2B///small integral membrane protein 10 like 2A
1565830_at	1.2e-06	1.68e-08	6.17908	9.22895	-1.82812
223208_at	1.21e-06	1.69e-08	-6.17713	9.22055	0.948742	KCTD10	potassium channel tetramerization domain containing 10
223268_at	1.23e-06	1.73e-08	6.17292	9.2024	-1.06917	C11orf54	chromosome 11 open reading frame 54
208853_s_at	1.24e-06	1.74e-08	-6.17187	9.19784	1.29606	CANX	calnexin
241972_at	1.25e-06	1.75e-08	6.16947	9.18751	-1.49996	ZNF674-AS1	ZNF674 antisense RNA 1 (head to head)
218302_at	1.25e-06	1.76e-08	-6.16835	9.18269	1.67415	PSENEN	presenilin enhancer gamma-secretase subunit
205433_at	1.26e-06	1.78e-08	6.16659	9.17511	-3.54586	BCHE	butyrylcholinesterase
213726_x_at	1.26e-06	1.78e-08	-6.16569	9.17124	1.36165	TUBB4B	tubulin beta 4B class IVb
228810_at	1.27e-06	1.79e-08	-6.16488	9.16773	1.47519	CCNYL1	cyclin Y like 1
217772_s_at	1.27e-06	1.79e-08	-6.16472	9.16704	1.47946	MTCH2	mitochondrial carrier 2
206580_s_at	1.27e-06	1.81e-08	6.16282	9.15886	-1.59824	EFEMP2	EGF containing fibulin like extracellular matrix protein 2
238066_at	1.27e-06	1.81e-08	6.16263	9.15805	-2.55603	RBP7	retinol binding protein 7
244128_x_at	1.28e-06	1.81e-08	6.162	9.15531	-2.29585	GLIS1	GLIS family zinc finger 1
204749_at	1.3e-06	1.85e-08	6.15799	9.13803	-2.58836	NAP1L3	nucleosome assembly protein 1 like 3
209024_s_at	1.32e-06	1.87e-08	-6.15468	9.12378	2.00816	SYNCRIP	synaptotagmin binding cytoplasmic RNA interacting protein
231773_at	1.33e-06	1.89e-08	6.15252	9.1145	-4.87874	ANGPTL1	angiopoietin like 1
208657_s_at	1.33e-06	1.9e-08	-6.15113	9.10852	1.61533	2020-09-09	septin 9
231940_at	1.34e-06	1.92e-08	6.14981	9.10282	-0.994838	ZNF529	zinc finger protein 529
209950_s_at	1.34e-06	1.92e-08	6.14924	9.10038	-2.60343	VILL	villin like
204755_x_at	1.35e-06	1.94e-08	6.14715	9.09139	-2.82011	HLF	HLF, PAR bZIP transcription factor
235814_at	1.35e-06	1.94e-08	6.14649	9.08852	-2.80502
223054_at	1.36e-06	1.95e-08	-6.14543	9.08396	0.894261	DNAJB11	DnaJ heat shock protein family (Hsp40) member B11
232165_at	1.36e-06	1.96e-08	-6.14464	9.08057	2.59083	EPPK1	epiplakin 1
209318_x_at	1.36e-06	1.97e-08	6.14407	9.07812	-2.10439	PLAGL1	PLAG1 like zinc finger 1
59375_at	1.36e-06	1.97e-08	6.14402	9.07791	-1.54435	MYO15B	myosin XVB
235610_at	1.38e-06	1.99e-08	6.14138	9.06655	-1.0029	ALKBH8	alkB homolog 8, tRNA methyltransferase
202619_s_at	1.38e-06	1.99e-08	-6.14101	9.06496	1.73373	PLOD2	procollagen-lysine,2-oxoglutarate 5-dioxygenase 2
38892_at	1.39e-06	2.01e-08	6.13898	9.05621	-0.972575	GLTSCR1L	GLTSCR1 like
220202_s_at	1.39e-06	2.02e-08	-6.13783	9.05127	1.11994	RC3H2	ring finger and CCCH-type domains 2
1553961_s_at	1.4e-06	2.04e-08	6.13576	9.04237	-1.1898	SNX21	sorting nexin family member 21
235086_at	1.41e-06	2.05e-08	6.13464	9.03756	-2.00941	THBS1	thrombospondin 1
1554108_at	1.41e-06	2.05e-08	6.13432	9.03619	-1.5754
219148_at	1.41e-06	2.05e-08	-6.1343	9.03609	2.62355	PBK	PDZ binding kinase
215044_s_at	1.41e-06	2.06e-08	-6.13404	9.035	1.01534	STAM2	signal transducing adaptor molecule 2
1554077_a_at	1.41e-06	2.06e-08	-6.13375	9.03374	1.04037	TMEM53	transmembrane protein 53
217862_at	1.42e-06	2.07e-08	6.1324	9.02793	-1.01456	PIAS1	protein inhibitor of activated STAT 1
209186_at	1.42e-06	2.09e-08	-6.13077	9.02093	0.91915	ATP2A2	ATPase sarcoplasmic/endoplasmic reticulum Ca2+ transporting 2
236151_at	1.43e-06	2.1e-08	6.12898	9.01324	-2.23382	SRRM4	serine/arginine repetitive matrix 4
227947_at	1.44e-06	2.11e-08	6.12835	9.01051	-1.07124	PHACTR2	phosphatase and actin regulator 2
226203_at	1.45e-06	2.13e-08	6.12619	9.00122	-0.844411	MYO9A	myosin IXA
228817_at	1.45e-06	2.13e-08	6.12567	8.99898	-0.905072	ALG9	ALG9, alpha-1,2-mannosyltransferase
230505_at	1.46e-06	2.15e-08	-6.12392	8.99149	1.8235	LOC145474	uncharacterized LOC145474
222576_s_at	1.46e-06	2.15e-08	-6.12362	8.99018	1.64265	AGO1	argonaute 1, RISC catalytic component
213469_at	1.46e-06	2.16e-08	6.12326	8.98865	-1.8895	PGAP1	post-GPI attachment to proteins 1
212021_s_at	1.46e-06	2.16e-08	-6.12278	8.98657	1.72887	MKI67	marker of proliferation Ki-67
210951_x_at	1.48e-06	2.2e-08	-6.1192	8.9712	1.33688	RAB27A	RAB27A, member RAS oncogene family
225505_s_at	1.48e-06	2.2e-08	6.11891	8.96993	-1.48318	PCED1A	PC-esterase domain containing 1A
1568377_x_at	1.48e-06	2.2e-08	6.11845	8.96797	-2.62532	DEFB124	defensin beta 124
217820_s_at	1.49e-06	2.21e-08	-6.11808	8.96637	1.15958	ENAH	enabled homolog (Drosophila)
227122_at	1.49e-06	2.21e-08	6.1178	8.96518	-0.85672	ZNF791	zinc finger protein 791
201300_s_at	1.49e-06	2.22e-08	6.11729	8.96299	-2.34505	PRNP	prion protein
235007_at	1.49e-06	2.22e-08	6.11712	8.96228	-0.867939	BBS7	Bardet-Biedl syndrome 7
222483_at	1.49e-06	2.22e-08	-6.11695	8.96154	1.14353	EFHD2	EF-hand domain family member D2
200660_at	1.49e-06	2.22e-08	-6.11654	8.95976	1.75709	S100A11	S100 calcium binding protein A11
201277_s_at	1.51e-06	2.25e-08	-6.11343	8.94641	1.68783	HNRNPAB	heterogeneous nuclear ribonucleoprotein A/B
227162_at	1.51e-06	2.26e-08	6.11289	8.9441	-0.933738	ZBTB26	zinc finger and BTB domain containing 26
230644_at	1.51e-06	2.26e-08	6.11271	8.94335	-3.52497	LRFN5	leucine rich repeat and fibronectin type III domain containing 5
237301_at	1.51e-06	2.28e-08	6.1114	8.93771	-2.36709
209790_s_at	1.51e-06	2.28e-08	-6.11088	8.93549	1.29747	CASP6	caspase 6
201368_at	1.52e-06	2.28e-08	6.11044	8.93356	-1.59259	ZFP36L2	ZFP36 ring finger protein like 2
224771_at	1.53e-06	2.31e-08	-6.10822	8.92406	2.28258	NAV1	neuron navigator 1
200810_s_at	1.53e-06	2.31e-08	6.1081	8.92355	-1.09287	CIRBP	cold inducible RNA binding protein
217322_x_at	1.54e-06	2.33e-08	-6.10587	8.91394	1.49142
229699_at	1.54e-06	2.34e-08	6.10536	8.91177	-0.992455	LOC100129550	uncharacterized LOC100129550
217785_s_at	1.55e-06	2.34e-08	-6.10466	8.90875	2.4287	YKT6	YKT6 v-SNARE homolog (S. cerevisiae)
202095_s_at	1.55e-06	2.35e-08	-6.10454	8.90826	2.25709	BIRC5	baculoviral IAP repeat containing 5
231395_at	1.55e-06	2.35e-08	6.10389	8.90548	-2.41105	ATP8A2	ATPase phospholipid transporting 8A2
1559102_at	1.56e-06	2.37e-08	6.10222	8.89829	-1.17951	LOC105377371	uncharacterized LOC105377371
201053_s_at	1.56e-06	2.38e-08	6.10102	8.89313	-1.22875	PSMF1	proteasome inhibitor subunit 1
214697_s_at	1.56e-06	2.39e-08	-6.10071	8.89182	1.66159	PTBP3	polypyrimidine tract binding protein 3
216908_x_at	1.59e-06	2.43e-08	6.09687	8.87535	-2.03477	RRN3P1	RRN3 homolog, RNA polymerase I transcription factor pseudogene 1
228128_x_at	1.61e-06	2.46e-08	6.09385	8.86238	-3.11449	PAPPA	pappalysin 1
205248_at	1.61e-06	2.46e-08	-6.09381	8.86222	1.73264	DOPEY2	dopey family member 2
229227_at	1.68e-06	2.57e-08	6.08386	8.81956	-1.34588	DICER1-AS1	DICER1 antisense RNA 1
228323_at	1.7e-06	2.61e-08	-6.0808	8.80645	1.71557	KNL1	kinetochore scaffold 1
203411_s_at	1.7e-06	2.61e-08	-6.08033	8.80442	1.31474	LMNA	lamin A/C
209225_x_at	1.7e-06	2.62e-08	-6.0802	8.8039	0.994105	TNPO1	transportin 1
226548_at	1.7e-06	2.62e-08	-6.07993	8.80273	1.77062	SBK1	SH3 domain binding kinase 1
213365_at	1.7e-06	2.62e-08	6.07938	8.80038	-0.961241	ERI2	ERI1 exoribonuclease family member 2
1569057_s_at	1.7e-06	2.63e-08	-6.07915	8.79937	1.4054	MIA3	MIA family member 3, ER export factor
202348_s_at	1.71e-06	2.64e-08	-6.07803	8.79461	0.839239	TOR1A	torsin family 1 member A
220399_at	1.73e-06	2.68e-08	6.07499	8.78155	-1.26953	LINC00115	long intergenic non-protein coding RNA 115
205801_s_at	1.74e-06	2.69e-08	-6.07356	8.77543	2.13676	RASGRP3	RAS guanyl releasing protein 3
219181_at	1.74e-06	2.7e-08	-6.07334	8.77449	2.90056	LIPG	lipase G, endothelial type
213476_x_at	1.74e-06	2.7e-08	-6.07308	8.77337	1.38961	TUBB3	tubulin beta 3 class III
37547_at	1.75e-06	2.71e-08	6.0719	8.76835	-1.64839	BBS9	Bardet-Biedl syndrome 9
219158_s_at	1.76e-06	2.74e-08	-6.06983	8.75948	1.32949	NAA15	N(alpha)-acetyltransferase 15, NatA auxiliary subunit
226914_at	1.76e-06	2.74e-08	-6.06976	8.75918	1.32217	ARPC5L	actin related protein 2/3 complex subunit 5 like
224618_at	1.76e-06	2.74e-08	-6.06953	8.75817	0.991624	PTBP3	polypyrimidine tract binding protein 3
1555355_a_at	1.76e-06	2.74e-08	-6.06952	8.75815	2.31861	ETS1	ETS proto-oncogene 1, transcription factor
205259_at	1.76e-06	2.75e-08	6.06881	8.75512	-2.92823	NR3C2	nuclear receptor subfamily 3 group C member 2
202191_s_at	1.76e-06	2.76e-08	6.06839	8.7533	-2.19764	GAS7	growth arrest specific 7
228180_at	1.76e-06	2.76e-08	6.06825	8.75272	-1.21253
209687_at	1.77e-06	2.77e-08	6.06698	8.74727	-3.6664	CXCL12	C-X-C motif chemokine ligand 12
227662_at	1.77e-06	2.78e-08	6.06665	8.74585	-2.89066	SYNPO2	synaptopodin 2
205538_at	1.77e-06	2.78e-08	-6.06644	8.74496	1.26995	CORO2A	coronin 2A
208478_s_at	1.77e-06	2.79e-08	-6.06569	8.74176	1.66603	BAX	BCL2 associated X, apoptosis regulator
204215_at	1.79e-06	2.82e-08	6.06364	8.73297	-1.20345	TMEM243	transmembrane protein 243
221834_at	1.79e-06	2.82e-08	6.0633	8.73152	-1.48166	LOC100507577///LONP2	uncharacterized LOC100507577///lon peptidase 2, peroxisomal
223757_at	1.8e-06	2.85e-08	6.06077	8.7207	-3.71389	DIO3OS	DIO3 opposite strand/antisense RNA (head to head)
236780_at	1.86e-06	2.95e-08	6.0534	8.68916	-1.55934
232313_at	1.87e-06	2.96e-08	6.05234	8.68463	-3.61879	TMEM132C	transmembrane protein 132C
229672_at	1.87e-06	2.96e-08	6.05219	8.68399	-1.4228	UQCC1	ubiquinol-cytochrome c reductase complex assembly factor 1
201018_at	1.87e-06	2.96e-08	6.05213	8.68372	-1.61204	EIF1AX	eukaryotic translation initiation factor 1A, X-linked
236783_at	1.87e-06	2.97e-08	6.05148	8.68096	-2.67078	KCNIP4	potassium voltage-gated channel interacting protein 4
218970_s_at	1.87e-06	2.97e-08	6.05145	8.68081	-0.79753	CUTC	cutC copper transporter
235867_at	1.89e-06	3.01e-08	6.04864	8.66883	-1.35792	GSTM3	glutathione S-transferase mu 3
235347_at	1.89e-06	3.02e-08	6.04802	8.66615	-0.813564	LRCH3	leucine rich repeats and calponin homology domain containing 3
201286_at	1.91e-06	3.05e-08	-6.04548	8.6553	1.84023	SDC1	syndecan 1
203120_at	1.92e-06	3.08e-08	-6.04374	8.64785	1.29557	TP53BP2	tumor protein p53 binding protein 2
224896_s_at	1.93e-06	3.09e-08	-6.04304	8.64488	1.20485	TTL	tubulin tyrosine ligase
212138_at	1.94e-06	3.1e-08	-6.04194	8.6402	0.979692	PDS5A	PDS5 cohesin associated factor A
228039_at	2.01e-06	3.22e-08	6.03364	8.60473	-0.849301	DDX46	DEAD-box helicase 46
225655_at	2.01e-06	3.22e-08	-6.03334	8.60344	2.09209	UHRF1	ubiquitin like with PHD and ring finger domains 1
229797_at	2.01e-06	3.24e-08	6.03231	8.59904	-2.33535	MCOLN3	mucolipin 3
208736_at	2.04e-06	3.29e-08	-6.02869	8.5836	1.25537	ARPC3	actin related protein 2/3 complex subunit 3
217398_x_at	2.06e-06	3.32e-08	-6.02685	8.57573	1.93159	GAPDH	glyceraldehyde-3-phosphate dehydrogenase
227775_at	2.06e-06	3.32e-08	6.02674	8.57528	-1.88983	CELF6	CUGBP, Elav-like family member 6
219855_at	2.07e-06	3.35e-08	6.02458	8.56603	-2.20879	NUDT11	nudix hydrolase 11
242523_at	2.07e-06	3.35e-08	6.02444	8.56542	-1.23934	LINC00938	long intergenic non-protein coding RNA 938
212331_at	2.1e-06	3.39e-08	6.02176	8.55399	-0.914651	RBL2	RB transcriptional corepressor like 2
229704_at	2.1e-06	3.4e-08	6.02105	8.551	-1.46718
225595_at	2.1e-06	3.41e-08	6.02091	8.5504	-1.41435	CREBZF	CREB/ATF bZIP transcription factor
222478_at	2.1e-06	3.42e-08	6.0203	8.5478	-1.0565	VPS36	vacuolar protein sorting 36 homolog
234995_at	2.12e-06	3.46e-08	6.0176	8.53628	-1.1382	SPICE1	spindle and centriole associated protein 1
228093_at	2.12e-06	3.46e-08	6.01717	8.53444	-1.02971	ZNF599	zinc finger protein 599
238803_at	2.12e-06	3.46e-08	6.01707	8.53401	-1.88955	HECTD2	HECT domain E3 ubiquitin protein ligase 2
1564383_s_at	2.12e-06	3.47e-08	6.01692	8.53335	-2.62259	FLJ35934	FLJ35934
204052_s_at	2.12e-06	3.47e-08	6.01668	8.53233	-5.07443	SFRP4	secreted frizzled related protein 4
203967_at	2.14e-06	3.49e-08	-6.01534	8.52663	1.90541	CDC6	cell division cycle 6
222420_s_at	2.14e-06	3.5e-08	-6.01473	8.52401	1.27594	UBE2H	ubiquitin conjugating enzyme E2 H
219894_at	2.15e-06	3.53e-08	6.01291	8.51627	-2.75966	MAGEL2	MAGE family member L2
228044_at	2.16e-06	3.54e-08	6.0125	8.5145	-2.39327	SERP2	stress-associated endoplasmic reticulum protein family member 2
AFFX-HUMGAPDH/M33197_M_at	2.16e-06	3.55e-08	-6.01188	8.51185	2.13801	GAPDH	glyceraldehyde-3-phosphate dehydrogenase
201870_at	2.17e-06	3.57e-08	-6.01028	8.50502	0.765982	TOMM34	translocase of outer mitochondrial membrane 34
202552_s_at	2.19e-06	3.6e-08	6.00836	8.49685	-1.40768	LOC101929500///CRIM1	uncharacterized LOC101929500///cysteine rich transmembrane BMP regulator 1
230201_at	2.19e-06	3.61e-08	6.00757	8.4935	-1.00073	FXR1	FMR1 autosomal homolog 1
205005_s_at	2.2e-06	3.63e-08	6.0065	8.48892	-1.41874	NMT2	N-myristoyltransferase 2
238456_at	2.2e-06	3.64e-08	6.00579	8.48588	-1.43364	LOC100289230	uncharacterized LOC100289230
201585_s_at	2.2e-06	3.64e-08	-6.00566	8.48537	1.31893	SFPQ	splicing factor proline and glutamine rich
208977_x_at	2.21e-06	3.66e-08	-6.00499	8.48248	1.32574	TUBB4B	tubulin beta 4B class IVb
202503_s_at	2.25e-06	3.73e-08	-6.00037	8.46278	2.04092	KIAA0101	KIAA0101
208627_s_at	2.27e-06	3.77e-08	-5.99833	8.45412	2.10937	YBX1	Y-box binding protein 1
208899_x_at	2.29e-06	3.8e-08	-5.99654	8.44651	1.11479	ATP6V1D	ATPase H+ transporting V1 subunit D
225293_at	2.29e-06	3.81e-08	5.99597	8.44408	-2.54308	COL27A1	collagen type XXVII alpha 1 chain
224776_at	2.29e-06	3.81e-08	-5.99581	8.44339	1.09702	GPAT4	glycerol-3-phosphate acyltransferase 4
214456_x_at	2.32e-06	3.86e-08	-5.99285	8.43076	3.89331	SAA2///SAA1	serum amyloid A2///serum amyloid A1
1554520_at	2.33e-06	3.88e-08	5.99162	8.42554	-1.57745	LOC283861	uncharacterized LOC283861
202154_x_at	2.35e-06	3.92e-08	-5.98928	8.41556	1.44052	TUBB3	tubulin beta 3 class III
225686_at	2.37e-06	3.97e-08	-5.98658	8.40409	1.08269	SKA2	spindle and kinetochore associated complex subunit 2
230708_at	2.38e-06	3.98e-08	5.98588	8.4011	-2.321	PRICKLE1	prickle planar cell polarity protein 1
202889_x_at	2.38e-06	3.98e-08	-5.98585	8.40096	1.79701	MAP7	microtubule associated protein 7
206228_at	2.38e-06	4e-08	5.98487	8.39679	-4.72748	PAX2	paired box 2
238497_at	2.39e-06	4.01e-08	5.98415	8.39376	-1.41758	TMEM136	transmembrane protein 136
203766_s_at	2.4e-06	4.04e-08	5.98253	8.38683	-3.09345	LMOD1	leiomodin 1
230435_at	2.4e-06	4.05e-08	5.98214	8.38519	-1.38631	FAM228B	family with sequence similarity 228 member B
226710_at	2.41e-06	4.05e-08	5.98163	8.38303	-1.20342	C8orf82	chromosome 8 open reading frame 82
229785_at	2.43e-06	4.09e-08	5.97955	8.37414	-0.959336	KRIT1	KRIT1, ankyrin repeat containing
217841_s_at	2.45e-06	4.14e-08	-5.97683	8.3626	0.853038	PPME1	protein phosphatase methylesterase 1
201818_at	2.46e-06	4.15e-08	-5.97637	8.36065	1.82304	LPCAT1	lysophosphatidylcholine acyltransferase 1
204754_at	2.46e-06	4.15e-08	5.97622	8.36	-1.8656	HLF	HLF, PAR bZIP transcription factor
228709_at	2.46e-06	4.16e-08	5.97582	8.3583	-1.13634	TPR	translocated promoter region, nuclear basket protein
203117_s_at	2.48e-06	4.21e-08	5.97314	8.3469	-1.40243	PAN2	PAN2 poly(A) specific ribonuclease subunit
218355_at	2.49e-06	4.23e-08	-5.97209	8.34244	1.8172	KIF4A	kinesin family member 4A
228890_at	2.53e-06	4.3e-08	5.96862	8.32768	-2.01493	ATOH8	atonal bHLH transcription factor 8
226949_at	2.55e-06	4.34e-08	-5.96611	8.31701	0.791685	GOLGA3	golgin A3
221520_s_at	2.57e-06	4.37e-08	-5.96484	8.31162	2.52297	CDCA8	cell division cycle associated 8
230927_at	2.59e-06	4.41e-08	5.96254	8.30183	-1.17968
204719_at	2.59e-06	4.43e-08	5.96173	8.2984	-3.55149	ABCA8	ATP binding cassette subfamily A member 8
204605_at	2.59e-06	4.43e-08	5.96159	8.29783	-0.838147	CGRRF1	cell growth regulator with ring finger domain 1
228972_at	2.61e-06	4.46e-08	5.96022	8.29197	-1.35264	PITPNA-AS1	PITPNA antisense RNA 1
202912_at	2.61e-06	4.46e-08	-5.9599	8.29062	2.12638	ADM	adrenomedullin
212365_at	2.64e-06	4.52e-08	-5.957	8.27831	1.28534	MYO1B	myosin IB
226512_at	2.64e-06	4.53e-08	5.9568	8.27745	-1.01768	ZMYM2	zinc finger MYM-type containing 2
211993_at	2.64e-06	4.54e-08	-5.9561	8.27448	1.68964	WNK1	WNK lysine deficient protein kinase 1
200635_s_at	2.65e-06	4.56e-08	-5.95502	8.26989	1.21479	PTPRF	protein tyrosine phosphatase, receptor type F
218573_at	2.66e-06	4.58e-08	5.95418	8.26632	-1.91782	MAGEH1	MAGE family member H1
209550_at	2.66e-06	4.59e-08	5.95351	8.26351	-2.05505	NDN	necdin, MAGE family member
226652_at	2.66e-06	4.6e-08	5.95339	8.26298	-0.992002	USP3	ubiquitin specific peptidase 3
1562583_s_at	2.68e-06	4.63e-08	5.95189	8.25661	-1.96498
226066_at	2.7e-06	4.66e-08	5.95031	8.24988	-1.43729	MITF	melanogenesis associated transcription factor
212694_s_at	2.7e-06	4.68e-08	-5.94936	8.24586	1.6155	PCCB	propionyl-CoA carboxylase beta subunit
220770_s_at	2.74e-06	4.74e-08	5.94631	8.23291	-1.1226	ZBED8	zinc finger BED-type containing 8
243707_at	2.75e-06	4.77e-08	5.94518	8.22814	-1.79555
201693_s_at	2.75e-06	4.77e-08	5.94485	8.22674	-1.95735	EGR1	early growth response 1
1557801_x_at	2.75e-06	4.77e-08	5.94476	8.22636	-1.13301	C11orf31	chromosome 11 open reading frame 31
229870_at	2.76e-06	4.81e-08	5.94312	8.21938	-1.28991	LOC644656	uncharacterized LOC644656
236500_at	2.76e-06	4.81e-08	5.94303	8.21901	-1.6846
230561_s_at	2.78e-06	4.84e-08	5.94157	8.21283	-1.24905	KANSL1L	KAT8 regulatory NSL complex subunit 1 like
227486_at	2.79e-06	4.87e-08	5.94048	8.20819	-3.0128	NT5E	5'-nucleotidase ecto
226634_at	2.8e-06	4.89e-08	5.93918	8.20268	-1.10178	METTL10	methyltransferase like 10
210764_s_at	2.82e-06	4.93e-08	5.93755	8.19576	-1.72373	CYR61	cysteine rich angiogenic inducer 61
227859_at	2.85e-06	4.99e-08	5.9346	8.18324	-1.12197	DNAJC27	DnaJ heat shock protein family (Hsp40) member C27
1558097_at	2.86e-06	5.01e-08	-5.93398	8.18061	0.743038	PRR14L	proline rich 14 like
228528_at	2.86e-06	5.01e-08	5.93388	8.18019	-2.08441	MIR29C///MIR29B2	microRNA 29c///microRNA 29b-2
214790_at	2.86e-06	5.02e-08	5.93363	8.17914	-1.42711	SENP6	SUMO1/sentrin specific peptidase 6
238472_at	2.9e-06	5.11e-08	5.92958	8.16199	-1.19731	FBXO9	F-box protein 9
1553719_s_at	2.9e-06	5.11e-08	5.92942	8.16129	-1.23851	ZNF548	zinc finger protein 548
221833_at	2.91e-06	5.12e-08	5.92908	8.15986	-1.7728	LOC100507577///LONP2///SIAH1	uncharacterized LOC100507577///lon peptidase 2, peroxisomal///siah E3 ubiquitin protein ligase 1
211630_s_at	2.92e-06	5.14e-08	-5.92795	8.15507	0.938134	GSS	glutathione synthetase
229984_at	2.92e-06	5.15e-08	5.9277	8.15399	-1.04853	DTWD1	DTW domain containing 1
212125_at	2.94e-06	5.2e-08	-5.9256	8.1451	2.11761	RANGAP1	Ran GTPase activating protein 1
1569129_s_at	2.95e-06	5.22e-08	5.9245	8.14042	-1.13728	C3orf38	chromosome 3 open reading frame 38
228875_at	2.95e-06	5.22e-08	5.92438	8.13991	-1.63504	FAM162B	family with sequence similarity 162 member B
235572_at	2.95e-06	5.23e-08	-5.92429	8.13955	2.37047	SPC24	SPC24, NDC80 kinetochore complex component
203373_at	2.95e-06	5.23e-08	5.92413	8.13886	-1.89324	SOCS2	suppressor of cytokine signaling 2
202583_s_at	2.96e-06	5.26e-08	-5.92304	8.13424	1.06879	RANBP9	RAN binding protein 9
233888_s_at	2.96e-06	5.26e-08	-5.92289	8.1336	1.96669	SRGAP1	SLIT-ROBO Rho GTPase activating protein 1
202437_s_at	2.96e-06	5.27e-08	5.92257	8.13226	-2.39548	CYP1B1	cytochrome P450 family 1 subfamily B member 1
228594_at	2.96e-06	5.28e-08	5.92214	8.13044	-0.857211	NADK2	NAD kinase 2, mitochondrial
200964_at	2.97e-06	5.29e-08	-5.92138	8.12721	0.957987	UBA1	ubiquitin like modifier activating enzyme 1
210353_s_at	2.97e-06	5.3e-08	5.92104	8.12577	-3.11563	SLC6A2	solute carrier family 6 member 2
201020_at	2.99e-06	5.35e-08	-5.91917	8.11787	1.26568	YWHAH	tyrosine 3-monooxygenase/tryptophan 5-monooxygenase activation protein eta
223540_at	2.99e-06	5.35e-08	-5.91907	8.11744	1.91103	NECTIN4	nectin cell adhesion molecule 4
225355_at	3.03e-06	5.42e-08	-5.91611	8.10492	1.30562	NEURL1B	neuralized E3 ubiquitin protein ligase 1B
232458_at	3.04e-06	5.45e-08	5.91498	8.10011	-2.7449	COL3A1	collagen type III alpha 1 chain
1554441_a_at	3.06e-06	5.48e-08	-5.91344	8.09358	1.17244	WAPL	WAPL cohesin release factor
227372_s_at	3.06e-06	5.49e-08	-5.91318	8.0925	1.36187	BAIAP2L1	BAI1 associated protein 2 like 1
203811_s_at	3.07e-06	5.52e-08	-5.91206	8.08775	2.44922	DNAJB4	DnaJ heat shock protein family (Hsp40) member B4
218674_at	3.07e-06	5.52e-08	5.91177	8.08652	-0.927312	TRAPPC13	trafficking protein particle complex 13
226082_s_at	3.08e-06	5.54e-08	-5.91105	8.08346	1.13432	SCAF4	SR-related CTD associated factor 4
209166_s_at	3.09e-06	5.57e-08	-5.90988	8.07852	1.11602	MAN2B1	mannosidase alpha class 2B member 1
231807_at	3.1e-06	5.59e-08	5.90893	8.0745	-1.21254	KIAA1217	KIAA1217
231853_at	3.1e-06	5.6e-08	5.90883	8.0741	-0.943673	TUBD1	tubulin delta 1
1557799_at	3.11e-06	5.62e-08	5.90785	8.06991	-1.0864	C11orf31	chromosome 11 open reading frame 31
222018_at	3.13e-06	5.67e-08	5.90578	8.06118	-1.1861	NACA	nascent polypeptide-associated complex alpha subunit
1557132_at	3.13e-06	5.68e-08	5.90543	8.05968	-3.019	WDR17	WD repeat domain 17
219747_at	3.14e-06	5.69e-08	5.90512	8.05839	-2.28151	NDNF	neuron derived neurotrophic factor
219743_at	3.15e-06	5.72e-08	5.90401	8.05367	-2.72544	HEY2	hes related family bHLH transcription factor with YRPW motif 2
203353_s_at	3.15e-06	5.73e-08	5.90335	8.05089	-0.732666	MBD1	methyl-CpG binding domain protein 1
201490_s_at	3.16e-06	5.76e-08	-5.90234	8.04661	2.42024	PPIF	peptidylprolyl isomerase F
223604_at	3.19e-06	5.81e-08	5.90039	8.03837	-1.69273	GARNL3	GTPase activating Rap/RanGAP domain like 3
202550_s_at	3.19e-06	5.83e-08	-5.8997	8.03547	0.847927	VAPB	VAMP associated protein B and C
222598_s_at	3.2e-06	5.84e-08	-5.89921	8.03337	1.70584	NAV2	neuron navigator 2
227404_s_at	3.2e-06	5.85e-08	5.89869	8.0312	-1.82796	EGR1	early growth response 1
230329_s_at	3.22e-06	5.88e-08	5.89743	8.02584	-1.05628	NUDT6	nudix hydrolase 6
229018_at	3.25e-06	5.96e-08	5.89463	8.014	-0.820851	METTL25	methyltransferase like 25
236353_at	3.28e-06	6.01e-08	5.89252	8.00508	-2.0487	LOC102724851///LOC101927268	uncharacterized LOC102724851///uncharacterized LOC101927268
201853_s_at	3.35e-06	6.15e-08	-5.8876	7.98429	1.43587	CDC25B	cell division cycle 25B
212713_at	3.35e-06	6.15e-08	5.88741	7.9835	-2.83622	MFAP4	microfibrillar associated protein 4
200606_at	3.38e-06	6.21e-08	-5.88528	7.97448	1.51789	DSP	desmoplakin
228728_at	3.39e-06	6.24e-08	5.8843	7.97035	-2.64524	CPED1	cadherin like and PC-esterase domain containing 1
65630_at	3.4e-06	6.27e-08	5.88314	7.96546	-0.826438	TMEM80	transmembrane protein 80
228664_at	3.41e-06	6.28e-08	5.88249	7.96271	-1.87508	TRIM52-AS1	TRIM52 antisense RNA 1 (head to head)
212628_at	3.44e-06	6.35e-08	5.88014	7.95277	-0.816449	PKN2	protein kinase N2
212765_at	3.44e-06	6.36e-08	5.87972	7.95101	-1.13248	CAMSAP2	calmodulin regulated spectrin associated protein family member 2
212221_x_at	3.47e-06	6.41e-08	5.87797	7.94362	-0.984039	IDS	iduronate 2-sulfatase
240135_x_at	3.47e-06	6.42e-08	5.8775	7.94165	-2.43222
235235_s_at	3.47e-06	6.43e-08	-5.87738	7.94114	1.71103	PATL1	PAT1 homolog 1, processing body mRNA decay factor
230319_at	3.48e-06	6.46e-08	5.87631	7.93661	-3.8064
227767_at	3.51e-06	6.52e-08	5.87405	7.92706	-0.854808	CSNK1G3	casein kinase 1 gamma 3
213488_at	3.51e-06	6.53e-08	5.8738	7.92601	-1.76052	SNED1	sushi, nidogen and EGF like domains 1
230211_at	3.51e-06	6.53e-08	5.87379	7.92598	-1.68577	TRIP11	thyroid hormone receptor interactor 11
203517_at	3.52e-06	6.55e-08	-5.87302	7.92274	0.79069	MTX2	metaxin 2
235425_at	3.52e-06	6.56e-08	-5.8729	7.92221	1.90695	SGO2	shugoshin 2
201271_s_at	3.52e-06	6.56e-08	-5.87272	7.92144	1.07482	RALY	RALY heterogeneous nuclear ribonucleoprotein
38043_at	3.52e-06	6.58e-08	5.87199	7.91839	-0.902621	FAM3A	family with sequence similarity 3 member A
1569788_at	3.53e-06	6.59e-08	5.8716	7.91674	-2.63908	ST8SIA1	ST8 alpha-N-acetyl-neuraminide alpha-2,8-sialyltransferase 1
201292_at	3.56e-06	6.66e-08	-5.86939	7.9074	2.0718	TOP2A	topoisomerase (DNA) II alpha
225535_s_at	3.59e-06	6.72e-08	-5.86732	7.89867	0.806096	TIMM23B///TIMM23	translocase of inner mitochondrial membrane 23 homolog B///translocase of inner mitochondrial membrane 23
36553_at	3.59e-06	6.73e-08	5.86682	7.89657	-1.01852	ASMTL	acetylserotonin O-methyltransferase-like
201499_s_at	3.59e-06	6.73e-08	-5.86681	7.89651	0.730101	USP7	ubiquitin specific peptidase 7
223307_at	3.6e-06	6.76e-08	-5.86598	7.89302	2.00435	CDCA3	cell division cycle associated 3
207945_s_at	3.61e-06	6.78e-08	-5.86515	7.8895	0.931131	CSNK1D	casein kinase 1 delta
236103_at	3.65e-06	6.86e-08	5.8625	7.87834	-1.76651
202526_at	3.65e-06	6.88e-08	5.86191	7.87584	-1.26545	SMAD4	SMAD family member 4
223305_at	3.67e-06	6.91e-08	5.86086	7.87142	-0.987285	TMEM216	transmembrane protein 216
217214_s_at	3.67e-06	6.93e-08	5.86037	7.86934	-2.66579	SLC6A2	solute carrier family 6 member 2
228157_at	3.7e-06	7e-08	5.85816	7.86005	-1.49046	ZNF207	zinc finger protein 207
228885_at	3.71e-06	7.02e-08	5.85747	7.85714	-2.58575	MAMDC2	MAM domain containing 2
230867_at	3.74e-06	7.09e-08	5.85511	7.8472	-2.99104	COL6A6	collagen type VI alpha 6 chain
225346_at	3.74e-06	7.09e-08	5.85498	7.84664	-1.07325	MTERF2	mitochondrial transcription termination factor 2
211700_s_at	3.75e-06	7.12e-08	5.85425	7.84355	-3.36652	TRO	trophinin
209373_at	3.78e-06	7.18e-08	-5.85229	7.8353	2.96835	MALL	mal, T-cell differentiation protein like
201694_s_at	3.8e-06	7.21e-08	5.85121	7.83075	-1.54168	EGR1	early growth response 1
204400_at	3.81e-06	7.24e-08	5.8503	7.82692	-2.43955	EFS	embryonal Fyn-associated substrate
208621_s_at	3.81e-06	7.26e-08	-5.84963	7.8241	2.46683	EZR	ezrin
229584_at	3.82e-06	7.28e-08	5.84921	7.82234	-2.59877	LRRK2	leucine rich repeat kinase 2
209240_at	3.83e-06	7.31e-08	5.84803	7.81736	-0.947996	OGT	O-linked N-acetylglucosamine (GlcNAc) transferase
223126_s_at	3.9e-06	7.45e-08	5.84375	7.79934	-1.54708	C1orf21	chromosome 1 open reading frame 21
219093_at	3.91e-06	7.47e-08	5.84313	7.7967	-2.89647	PID1	phosphotyrosine interaction domain containing 1
219289_at	3.91e-06	7.48e-08	-5.84301	7.7962	1.12069	HEATR3	HEAT repeat containing 3
208540_x_at	3.92e-06	7.51e-08	-5.84189	7.79149	1.27244
221962_s_at	3.94e-06	7.55e-08	-5.84066	7.78631	1.3481	UBE2H	ubiquitin conjugating enzyme E2 H
200815_s_at	3.96e-06	7.59e-08	-5.83947	7.78131	0.925142	PAFAH1B1	platelet activating factor acetylhydrolase 1b regulatory subunit 1
1554351_a_at	3.98e-06	7.65e-08	-5.83782	7.77434	1.2467	TIPRL	TOR signaling pathway regulator
201091_s_at	3.98e-06	7.66e-08	-5.83758	7.77335	1.00056	CBX3	chromobox 3
225235_at	4.02e-06	7.73e-08	-5.83556	7.76485	1.09723	TSPAN17	tetraspanin 17
213340_s_at	4.05e-06	7.81e-08	5.83312	7.75457	-0.859065	TP73-AS1	TP73 antisense RNA 1
200598_s_at	4.06e-06	7.84e-08	-5.83214	7.75045	1.33792	MIR3652///HSP90B1	microRNA 3652///heat shock protein 90 beta family member 1
242734_x_at	4.06e-06	7.84e-08	5.83211	7.75033	-2.14252	GALT	galactose-1-phosphate uridylyltransferase
218332_at	4.09e-06	7.9e-08	5.83056	7.74378	-4.02131	BEX1	brain expressed X-linked 1
201399_s_at	4.14e-06	8e-08	-5.82774	7.73192	1.44786	TRAM1	translocation associated membrane protein 1
225887_at	4.16e-06	8.05e-08	-5.82612	7.72513	0.81843	PROSER1	proline and serine rich 1
225253_s_at	4.2e-06	8.14e-08	-5.82355	7.71431	1.33758	METTL2A///METTL2B	methyltransferase like 2A///methyltransferase like 2B
227935_s_at	4.22e-06	8.18e-08	-5.82242	7.70958	1.27437	PCGF5	polycomb group ring finger 5
207170_s_at	4.22e-06	8.19e-08	5.82227	7.70893	-1.02087	LETMD1	LETM1 domain containing 1
219487_at	4.22e-06	8.19e-08	5.82214	7.70838	-1.57118	BBS10	Bardet-Biedl syndrome 10
236270_at	4.24e-06	8.25e-08	5.82054	7.70167	-1.71751	NFATC4	nuclear factor of activated T-cells 4
215505_s_at	4.26e-06	8.29e-08	-5.8194	7.69685	2.03219	STRN3	striatin 3
230624_at	4.31e-06	8.39e-08	5.81664	7.68529	-2.02811	SLC25A27	solute carrier family 25 member 27
202294_at	4.32e-06	8.42e-08	5.81592	7.68224	-0.822907	STAG1	stromal antigen 1
204872_at	4.34e-06	8.46e-08	5.81476	7.67738	-2.07539	TLE4	transducin like enhancer of split 4
205407_at	4.34e-06	8.47e-08	5.81449	7.67623	-2.09082	RECK	reversion inducing cysteine rich protein with kazal motifs
240806_at	4.37e-06	8.54e-08	5.81279	7.66911	-1.61385	RPL15	ribosomal protein L15
221676_s_at	4.37e-06	8.54e-08	-5.81261	7.66836	1.56321	CORO1C	coronin 1C
217506_at	4.4e-06	8.62e-08	5.81047	7.65933	-2.69677
215369_at	4.4e-06	8.64e-08	5.80993	7.65708	-2.51423
1554667_s_at	4.4e-06	8.64e-08	-5.80993	7.65707	0.838005	METTL8	methyltransferase like 8
226924_at	4.4e-06	8.65e-08	5.80982	7.6566	-1.22419	LINC00909	long intergenic non-protein coding RNA 909
227568_at	4.4e-06	8.66e-08	5.80958	7.65562	-1.58616	HECTD2	HECT domain E3 ubiquitin protein ligase 2
1555360_a_at	4.4e-06	8.66e-08	-5.80955	7.65548	1.35802	DNAJC11	DnaJ heat shock protein family (Hsp40) member C11
201473_at	4.41e-06	8.69e-08	5.8088	7.65233	-1.60881	JUNB	JunB proto-oncogene, AP-1 transcription factor subunit
205591_at	4.42e-06	8.71e-08	5.80822	7.64988	-2.80659	OLFM1	olfactomedin 1
225783_at	4.44e-06	8.76e-08	-5.80679	7.64388	1.00031	UBE2F	ubiquitin conjugating enzyme E2 F (putative)
203135_at	4.45e-06	8.79e-08	5.80613	7.6411	-0.875422	TBP	TATA-box binding protein
209891_at	4.45e-06	8.8e-08	-5.80597	7.64046	2.42932	SPC25	SPC25, NDC80 kinetochore complex component
236114_at	4.45e-06	8.81e-08	-5.80549	7.63841	2.54621
201590_x_at	4.47e-06	8.85e-08	-5.80446	7.63411	1.53036	ANXA2	annexin A2
202856_s_at	4.49e-06	8.9e-08	-5.80326	7.62908	1.72995	MIR6787///SLC16A3	microRNA 6787///solute carrier family 16 member 3
228725_x_at	4.5e-06	8.93e-08	-5.80261	7.62634	1.19714	PRMT2	protein arginine methyltransferase 2
203378_at	4.52e-06	8.99e-08	5.80111	7.62002	-0.994996	PCF11	PCF11 cleavage and polyadenylation factor subunit
207833_s_at	4.53e-06	9.01e-08	-5.80042	7.61716	2.50442	HLCS	holocarboxylase synthetase
201566_x_at	4.53e-06	9.01e-08	5.8004	7.61707	-1.6051	ID2	inhibitor of DNA binding 2, HLH protein
222675_s_at	4.53e-06	9.02e-08	-5.80013	7.61593	1.59382	BAIAP2L1	BAI1 associated protein 2 like 1
208974_x_at	4.57e-06	9.11e-08	-5.7979	7.60656	1.02657	KPNB1	karyopherin subunit beta 1
205384_at	4.57e-06	9.12e-08	5.79766	7.60558	-2.16885	FXYD1	FXYD domain containing ion transport regulator 1
220102_at	4.59e-06	9.16e-08	5.79667	7.60141	-2.2094	FOXL2	forkhead box L2
208794_s_at	4.61e-06	9.21e-08	-5.79547	7.59639	0.884512	SMARCA4	SWI/SNF related, matrix associated, actin dependent regulator of chromatin, subfamily a, member 4
204051_s_at	4.62e-06	9.25e-08	5.79454	7.59248	-3.40272	SFRP4	secreted frizzled related protein 4
37005_at	4.64e-06	9.3e-08	5.79335	7.58749	-1.62096	MINOS1-NBL1///NBL1	MINOS1-NBL1 readthrough///neuroblastoma 1, DAN family BMP antagonist
239889_at	4.66e-06	9.33e-08	5.79247	7.58379	-3.23978	SERP2	stress-associated endoplasmic reticulum protein family member 2
201468_s_at	4.66e-06	9.35e-08	-5.79201	7.58185	2.74817	NQO1	NAD(P)H quinone dehydrogenase 1
1568838_at	4.67e-06	9.38e-08	5.79129	7.57883	-2.66122	WASIR2	WASH and IL9R antisense RNA 2
233113_at	4.72e-06	9.48e-08	5.78879	7.56834	-2.60574	ADAMTS9-AS2	ADAMTS9 antisense RNA 2
222155_s_at	4.78e-06	9.62e-08	-5.78553	7.55471	1.61706	SLC52A2	solute carrier family 52 member 2
217871_s_at	4.78e-06	9.63e-08	-5.78533	7.55384	1.33031	MIF	macrophage migration inhibitory factor (glycosylation-inhibiting factor)
215223_s_at	4.79e-06	9.65e-08	-5.78492	7.55213	2.26848	LOC100129518///SOD2	uncharacterized LOC100129518///superoxide dismutase 2, mitochondrial
222170_at	4.79e-06	9.67e-08	5.7844	7.54996	-1.83207	ZNF213-AS1	ZNF213 antisense RNA 1 (head to head)
202959_at	4.8e-06	9.7e-08	5.78362	7.54667	-1.17884	MUT	methylmalonyl-CoA mutase
231789_at	4.8e-06	9.7e-08	5.78356	7.54644	-2.40111	PCDHB15	protocadherin beta 15
230895_at	4.81e-06	9.73e-08	-5.78289	7.5436	3.17117	HAPLN1	hyaluronan and proteoglycan link protein 1
226269_at	4.81e-06	9.74e-08	5.78279	7.54321	-1.7119	GDAP1	ganglioside induced differentiation associated protein 1
227786_at	4.81e-06	9.74e-08	5.78262	7.54247	-1.29387	MED30	mediator complex subunit 30
222101_s_at	4.89e-06	9.91e-08	5.77868	7.52598	-1.85812	DCHS1	dachsous cadherin-related 1
1561042_at	4.95e-06	1.01e-07	-5.77535	7.51204	1.4743	CASC7///AGO2	cancer susceptibility candidate 7 (non-protein coding)///argonaute 2, RISC catalytic component
225472_at	4.98e-06	1.01e-07	5.77382	7.50563	-0.975325	GPANK1	G-patch domain and ankyrin repeats 1
208908_s_at	4.98e-06	1.01e-07	-5.77376	7.50535	1.30953	CAST	calpastatin
228764_s_at	4.98e-06	1.01e-07	5.77336	7.50367	-0.741815	NEDD8-MDP1///MDP1	NEDD8-MDP1 readthrough///magnesium dependent phosphatase 1
1556427_s_at	4.98e-06	1.02e-07	5.773	7.50218	-2.00216	LRRN4CL	LRRN4 C-terminal like
1559108_at	4.98e-06	1.02e-07	-5.77291	7.50181	2.31751	VPS53	VPS53, GARP complex subunit
223167_s_at	5e-06	1.02e-07	5.77186	7.49742	-0.866753	USP25	ubiquitin specific peptidase 25
236101_at	5e-06	1.02e-07	5.77164	7.49648	-2.48735
204709_s_at	5e-06	1.02e-07	-5.77147	7.49577	2.61941	KIF23	kinesin family member 23
55616_at	5.02e-06	1.03e-07	5.7703	7.49089	-0.762174	PGAP3	post-GPI attachment to proteins 3
222904_s_at	5.08e-06	1.04e-07	-5.76742	7.47882	2.2885	TMC5	transmembrane channel like 5
241957_x_at	5.08e-06	1.04e-07	5.7672	7.4779	-1.10453	LIN7B	lin-7 homolog B, crumbs cell polarity complex component
1558293_at	5.1e-06	1.05e-07	5.76623	7.47382	-1.39506	KIAA1107	KIAA1107
200768_s_at	5.15e-06	1.06e-07	5.76379	7.46363	-1.04378	MAT2A	methionine adenosyltransferase 2A
230588_s_at	5.15e-06	1.06e-07	5.7634	7.46199	-1.09817	LOC730268///LOC285074	anaphase-promoting complex subunit 1-like///anaphase promoting complex subunit 1 pseudogene
228750_at	5.2e-06	1.07e-07	5.76129	7.45318	-1.86966	COL14A1	collagen type XIV alpha 1 chain
208653_s_at	5.2e-06	1.07e-07	-5.76077	7.45098	1.55313	CD164	CD164 molecule
219923_at	5.28e-06	1.09e-07	5.75725	7.43627	-1.29586	TRIM45	tripartite motif containing 45
1552742_at	5.29e-06	1.09e-07	5.75685	7.43459	-2.87376	KCNH8	potassium voltage-gated channel subfamily H member 8
218765_at	5.31e-06	1.1e-07	5.75574	7.42994	-1.06426	SIDT2	SID1 transmembrane family member 2
214718_at	5.31e-06	1.1e-07	5.75558	7.42929	-1.1886	GATAD1	GATA zinc finger domain containing 1
201055_s_at	5.31e-06	1.1e-07	-5.75532	7.42818	0.938584	HNRNPA0	heterogeneous nuclear ribonucleoprotein A0
239133_at	5.31e-06	1.1e-07	5.75477	7.42588	-0.933724	CTDSPL2	CTD small phosphatase like 2
208308_s_at	5.33e-06	1.1e-07	-5.75403	7.4228	1.74522	GPI	glucose-6-phosphate isomerase
200825_s_at	5.35e-06	1.11e-07	-5.75305	7.41872	1.01768	HYOU1	hypoxia up-regulated 1
231120_x_at	5.36e-06	1.11e-07	5.7523	7.41555	-2.8908	PKIB	protein kinase (cAMP-dependent, catalytic) inhibitor beta
229636_at	5.38e-06	1.12e-07	5.75123	7.4111	-2.30651	CYB561D2	cytochrome b561 family member D2
226932_at	5.41e-06	1.12e-07	5.74976	7.40496	-2.36198	SSPN	sarcospan
238620_at	5.42e-06	1.13e-07	5.74887	7.40121	-1.48233
221881_s_at	5.42e-06	1.13e-07	-5.74874	7.40068	2.0006	CLIC4	chloride intracellular channel 4
200712_s_at	5.44e-06	1.13e-07	-5.74767	7.3962	1.08201	MAPRE1	microtubule associated protein RP/EB family member 1
228307_at	5.44e-06	1.14e-07	5.74752	7.3956	-1.88775	EMILIN3	elastin microfibril interfacer 3
230198_at	5.47e-06	1.14e-07	5.74624	7.39023	-1.10202
207956_x_at	5.47e-06	1.14e-07	5.74589	7.38875	-1.01616	PDS5B	PDS5 cohesin associated factor B
1557905_s_at	5.47e-06	1.14e-07	-5.74576	7.38821	2.12589	CD44	CD44 molecule (Indian blood group)
218244_at	5.51e-06	1.15e-07	5.74382	7.38014	-0.786482	NOL8	nucleolar protein 8
227148_at	5.52e-06	1.16e-07	5.74344	7.37854	-2.47985	PLEKHH2	pleckstrin homology, MyTH4 and FERM domain containing H2
205943_at	5.53e-06	1.16e-07	-5.74247	7.37448	2.02401	TDO2	tryptophan 2,3-dioxygenase
213503_x_at	5.54e-06	1.16e-07	-5.74205	7.37271	1.43707	ANXA2	annexin A2
218517_at	5.55e-06	1.17e-07	5.74		0
