# Supplementary material for: Identification and prognostic value of DLGAP5 in endometrial cancer
Source: PeerJ. 2020 Nov 27;8:e10433. doi: 10.7717/peerj.10433 (PMC7703392; doi:10.7717/peerj.10433)
Supplement: Supplemental Information 2 [file peerj-08-10433-s002.xlsx]

## Sheet: GSE39099-N-T1T2
ID	adj.P.Val	P.Value	t	B	logFC	Gene.symbol	Gene.title
206306_at	0.721	0.000952	-10.5	-4.58	-8.77	RYR3	ryanodine receptor 3
218273_s_at	0.721	0.001516	9.11	-4.58	7.58	PDP1	pyruvate dehyrogenase phosphatase catalytic subunit 1
208335_s_at	0.721	0.001661	-8.86	-4.58	-7.39	ACKR1	atypical chemokine receptor 1 (Duffy blood group)
206023_at	0.721	0.001699	8.8	-4.58	10.1	NMU	neuromedin U
220818_s_at	0.721	0.001764	-8.7	-4.58	-7.53	TRPC4	transient receptor potential cation channel subfamily C member 4
209612_s_at	0.721	0.001789	-8.67	-4.58	-7.41	ADH1B	alcohol dehydrogenase 1B (class I), beta polypeptide
213714_at	0.721	0.001945	-8.45	-4.58	-7.52	CACNB2	calcium voltage-gated channel auxiliary subunit beta 2
216307_at	0.721	0.001978	-8.41	-4.58	-7	DGKB	diacylglycerol kinase beta
228133_s_at	0.721	0.00207	-8.3	-4.58	-6.98	MYH11	myosin heavy chain 11
207802_at	0.721	0.002113	-8.25	-4.58	-8.04	CRISP3	cysteine rich secretory protein 3
242468_at	0.721	0.002156	8.2	-4.58	6.84
232116_at	0.721	0.002575	7.77	-4.58	6.44	GRHL3	grainyhead like transcription factor 3
233408_at	0.721	0.002685	7.67	-4.58	6.47	PREX2	phosphatidylinositol-3,4,5-trisphosphate dependent Rac exchange factor 2
201495_x_at	0.721	0.002702	-7.66	-4.58	-6.36	MYH11	myosin heavy chain 11
1563933_a_at	0.721	0.00274	-7.63	-4.58	-6.34	PLD5	phospholipase D family member 5
206204_at	0.721	0.002815	7.57	-4.58	6.3	GRB14	growth factor receptor bound protein 14
1559459_at	0.721	0.00285	7.54	-4.58	6.95	LOC613266	uncharacterized LOC613266
1561553_at	0.721	0.002887	-7.51	-4.58	-6.22	LOC101929147	uncharacterized LOC101929147
208266_at	0.721	0.002887	7.51	-4.58	6.23	C8orf17	chromosome 8 open reading frame 17
236828_at	0.721	0.003007	7.42	-4.58	6.19
221909_at	0.721	0.003024	7.4	-4.58	6.14	RNFT2	ring finger protein, transmembrane 2
232267_at	0.721	0.003046	-7.39	-4.58	-6.17	ADGRD1	adhesion G protein-coupled receptor D1
221901_at	0.721	0.003069	-7.37	-4.58	-6.13	KIAA1644	KIAA1644
235115_at	0.721	0.003126	-7.33	-4.58	-6.08	PDE8B	phosphodiesterase 8B
223708_at	0.721	0.003154	-7.31	-4.58	-7.78	C1QTNF4	C1q and tumor necrosis factor related protein 4
206201_s_at	0.721	0.003169	-7.3	-4.58	-7.11	MEOX2	mesenchyme homeobox 2
1559296_at	0.721	0.003202	-7.28	-4.58	-6.13	ADAMTS9-AS2	ADAMTS9 antisense RNA 2
204940_at	0.721	0.003213	-7.27	-4.58	-7.45	PLN	phospholamban
1561895_at	0.721	0.003267	-7.23	-4.58	-5.99
232682_at	0.721	0.003286	7.22	-4.58	6.2	MREG	melanoregulin
1566044_at	0.721	0.003392	7.15	-4.58	6.08
210632_s_at	0.721	0.003393	-7.15	-4.58	-5.96	SGCA	sarcoglycan alpha
236884_at	0.721	0.003422	7.13	-4.58	5.91	RIMKLA	ribosomal modification protein rimK like family member A
220651_s_at	0.721	0.003519	7.07	-4.58	6.58	MCM10	minichromosome maintenance 10 replication initiation factor
1556997_a_at	0.721	0.003568	-7.04	-4.58	-5.87	LEPROT///LEPR	leptin receptor overlapping transcript///leptin receptor
236893_at	0.721	0.003577	7.04	-4.58	6.24	HOXB-AS3	HOXB cluster antisense RNA 3
206859_s_at	0.721	0.003689	-6.97	-4.58	-5.81	PAEP	progestagen associated endometrial protein
205591_at	0.721	0.003697	-6.97	-4.58	-5.82	OLFM1	olfactomedin 1
216333_x_at	0.721	0.003723	-6.95	-4.58	-7.06	TNXB///TNXA	tenascin XB///tenascin XA (pseudogene)
216560_x_at	0.721	0.003729	-6.95	-4.58	-5.77	IGLC1	immunoglobulin lambda constant 1
241350_at	0.721	0.003789	-6.91	-4.58	-6.87	FBXL22	F-box and leucine rich repeat protein 22
1564665_at	0.721	0.003835	6.89	-4.58	5.83
242909_at	0.721	0.003857	6.88	-4.58	6.03
1562573_at	0.721	0.003942	-6.83	-4.58	-5.69	CYP17A1	cytochrome P450 family 17 subfamily A member 1
220493_at	0.721	0.00404	6.78	-4.58	5.74	DMRT1	doublesex and mab-3 related transcription factor 1
205394_at	0.721	0.004058	6.77	-4.58	5.86	CHEK1	checkpoint kinase 1
1568711_a_at	0.721	0.004099	-6.75	-4.58	-5.62	LOC105369860	uncharacterized LOC105369860
228347_at	0.721	0.004115	6.74	-4.58	6.9	SIX1	SIX homeobox 1
205816_at	0.721	0.004139	6.73	-4.58	7.71	ITGB8	integrin subunit beta 8
211332_x_at	0.721	0.004144	6.73	-4.58	5.63	HFE	hemochromatosis
230255_at	0.721	0.004173	-6.71	-4.58	-5.62	GABRD	gamma-aminobutyric acid type A receptor delta subunit
207702_s_at	0.721	0.004218	-6.69	-4.58	-5.55	MAGI2	membrane associated guanylate kinase, WW and PDZ domain containing 2
209983_s_at	0.721	0.004233	-6.68	-4.58	-6.03	NRXN2	neurexin 2
204953_at	0.721	0.004292	-6.66	-4.58	-5.59	SNAP91	synaptosome associated protein 91
206552_s_at	0.721	0.0043	-6.65	-4.58	-6.61	TAC1	tachykinin precursor 1
232629_at	0.721	0.004331	6.64	-4.58	5.57	PROK2	prokineticin 2
1563834_a_at	0.721	0.004358	-6.62	-4.58	-5.51	AKNAD1	AKNA domain containing 1
242771_at	0.721	0.00436	-6.62	-4.58	-5.59	TTN	titin
1559420_x_at	0.721	0.004378	-6.62	-4.58	-5.74	CACNB2	calcium voltage-gated channel auxiliary subunit beta 2
225482_at	0.721	0.004435	6.59	-4.58	5.51	KIF1A	kinesin family member 1A
203968_s_at	0.721	0.004436	6.59	-4.58	5.67	CDC6	cell division cycle 6
218726_at	0.721	0.004443	6.59	-4.58	5.72	HJURP	Holliday junction recognition protein
227642_at	0.721	0.004484	6.57	-4.58	5.82	TFCP2L1	transcription factor CP2-like 1
234655_at	0.721	0.00451	6.56	-4.58	5.75
205392_s_at	0.721	0.004528	-6.55	-4.58	-5.97	CCL15-CCL14///CCL14	CCL15-CCL14 readthrough (NMD candidate)///C-C motif chemokine ligand 14
244235_at	0.721	0.004546	6.54	-4.58	5.47	IVNS1ABP	influenza virus NS1A binding protein
205767_at	0.721	0.004551	6.54	-4.58	7.53	EREG	epiregulin
1568574_x_at	0.721	0.004586	6.52	-4.58	6.85	SPP1	secreted phosphoprotein 1
205921_s_at	0.721	0.004687	6.48	-4.58	5.64	SLC6A6	solute carrier family 6 member 6
1564822_at	0.721	0.004688	6.48	-4.58	5.47
237413_at	0.721	0.004692	-6.48	-4.58	-5.4	MAPK10	mitogen-activated protein kinase 10
226439_s_at	0.721	0.004693	-6.48	-4.58	-6.13	NBEA	neurobeachin
215229_at	0.721	0.004711	-6.47	-4.58	-5.4	LOC100129973	uncharacterized LOC100129973
220625_s_at	0.721	0.004718	6.47	-4.58	5.4	ELF5	E74 like ETS transcription factor 5
224459_at	0.721	0.004754	-6.45	-4.58	-5.38	L2HGDH	L-2-hydroxyglutarate dehydrogenase
1561433_at	0.721	0.004778	6.44	-4.58	5.35	MED15P9	mediator complex subunit 15 pseudogene 9
243754_at	0.721	0.00478	6.44	-4.58	7.47
244545_at	0.721	0.004827	6.42	-4.58	5.32
207789_s_at	0.721	0.004845	-6.41	-4.58	-5.63	DPP6	dipeptidyl peptidase like 6
219355_at	0.721	0.004852	-6.41	-4.58	-5.99	CXorf57	chromosome X open reading frame 57
1555772_a_at	0.721	0.004899	6.39	-4.58	5.42	CDC25A	cell division cycle 25A
244744_at	0.721	0.004916	6.38	-4.58	5.5	LOC100130502	uncharacterized LOC100130502
205267_at	0.721	0.00492	-6.38	-4.58	-5.49	POU2AF1	POU class 2 associating factor 1
1568672_at	0.721	0.004955	-6.37	-4.58	-5.28	EAF2	ELL associated factor 2
1565693_at	0.721	0.004969	-6.36	-4.58	-5.43	DTYMK	deoxythymidylate kinase
244471_x_at	0.721	0.005035	6.34	-4.58	5.27	PANX2	pannexin 2
217583_at	0.721	0.005037	-6.34	-4.58	-5.37	LOC101929036///PAH	uncharacterized LOC101929036///phenylalanine hydroxylase
1555731_a_at	0.721	0.005073	6.32	-4.58	6.44	AP1S3	adaptor related protein complex 1 sigma 3 subunit
231123_at	0.721	0.005146	-6.3	-4.58	-5.23	TRIM36	tripartite motif containing 36
1569054_at	0.721	0.005169	6.29	-4.58	5.36	SLC1A3	solute carrier family 1 member 3
243278_at	0.721	0.005191	-6.28	-4.58	-7.49	FOXP2	forkhead box P2
1563174_at	0.721	0.005344	6.22	-4.58	5.37	LINC01243	long intergenic non-protein coding RNA 1243
207093_s_at	0.721	0.005355	6.22	-4.58	5.16	LOC101927057///OMG	uncharacterized LOC101927057///oligodendrocyte myelin glycoprotein
213432_at	0.721	0.00536	-6.22	-4.58	-5.4	MUC5B	mucin 5B, oligomeric mucus/gel-forming
243427_at	0.721	0.005371	6.21	-4.58	5.21
230831_at	0.721	0.005374	6.21	-4.58	5.42	FRMD5	FERM domain containing 5
210833_at	0.721	0.00543	-6.19	-4.58	-6.74	PTGER3	prostaglandin E receptor 3
1555335_at	0.721	0.005469	-6.18	-4.58	-5.35	ITGA9	integrin subunit alpha 9
216561_x_at	0.721	0.005477	6.18	-4.58	5.12	SOX5P1	SRY-box 5 pseudogene 1
213992_at	0.721	0.00548	-6.17	-4.58	-5.66	COL4A6	collagen type IV alpha 6 chain
231113_at	0.721	0.005509	-6.16	-4.58	-5.86
237950_s_at	0.721	0.005517	-6.16	-4.58	-5.13
218730_s_at	0.721	0.005559	-6.15	-4.58	-6.95	OGN	osteoglycin
232313_at	0.721	0.00563	-6.12	-4.58	-5.4	TMEM132C	transmembrane protein 132C
1562169_at	0.721	0.005653	-6.12	-4.58	-5.99
232056_at	0.721	0.005753	6.08	-4.58	5.24	SCEL	sciellin
224131_at	0.721	0.005761	6.08	-4.58	5.15	HCAR1	hydroxycarboxylic acid receptor 1
205564_at	0.721	0.005785	-6.07	-4.58	-5.23	PAGE4	PAGE family member 4
209763_at	0.721	0.005785	-6.07	-4.58	-5.71	CHRDL1	chordin like 1
218814_s_at	0.721	0.005819	6.06	-4.58	5.03	TMEM206	transmembrane protein 206
1553829_at	0.721	0.00582	-6.06	-4.58	-5.11	CYP1B1-AS1	CYP1B1 antisense RNA 1
242754_at	0.721	0.00583	6.06	-4.58	5.41	LOC101559451	uncharacterized LOC101559451
1564007_at	0.721	0.005843	6.05	-4.58	6.1
208594_x_at	0.721	0.005875	6.04	-4.58	5.65	LILRA6	leukocyte immunoglobulin like receptor A6
212292_at	0.721	0.005888	6.04	-4.58	5.41	SLC7A1	solute carrier family 7 member 1
231395_at	0.721	0.00591	-6.03	-4.58	-5.71	ATP8A2	ATPase phospholipid transporting 8A2
226856_at	0.721	0.005914	-6.03	-4.58	-5.39	TMEM110-MUSTN1///MUSTN1///TMEM110	TMEM110-MUSTN1 readthrough///musculoskeletal, embryonic nuclear protein 1///transmembrane protein 110
1552470_a_at	0.721	0.005936	6.02	-4.58	5.18	ABHD11	abhydrolase domain containing 11
244367_at	0.721	0.005936	-6.02	-4.58	-5.05
240734_at	0.721	0.005941	-6.02	-4.58	-5.01	LOC100507221	uncharacterized LOC100507221
1568849_at	0.721	0.00601	6	-4.58	5.2	LINC00165	long intergenic non-protein coding RNA 165
216576_x_at	0.721	0.006036	-5.99	-4.58	-5.34	IGK///IGKC	immunoglobulin kappa locus///immunoglobulin kappa constant
242603_x_at	0.721	0.00605	-5.99	-4.58	-5.14	KIN	Kin17 DNA and RNA binding protein
220257_x_at	0.721	0.006068	5.98	-4.58	4.96	NXF2B///NXF2	nuclear RNA export factor 2B///nuclear RNA export factor 2
1554982_a_at	0.721	0.00607	-5.98	-4.58	-5.12	EQTN	equatorin
216546_s_at	0.721	0.006093	5.97	-4.58	5.06	CHI3L1	chitinase 3 like 1
232720_at	0.721	0.006135	-5.96	-4.58	-5.04	LINGO2	leucine rich repeat and Ig domain containing 2
223357_s_at	0.721	0.006166	5.95	-4.58	5.07	MTIF3	mitochondrial translational initiation factor 3
1568648_a_at	0.721	0.006174	-5.95	-4.58	-6.19	LOC100505851	uncharacterized LOC100505851
1561712_at	0.721	0.006184	5.95	-4.58	4.93
214708_at	0.721	0.006189	5.95	-4.58	5.02	SNTB1	syntrophin beta 1
205795_at	0.721	0.00619	-5.95	-4.58	-4.96	NRXN3	neurexin 3
233446_at	0.721	0.00621	5.94	-4.58	4.96	ONECUT2	one cut homeobox 2
228885_at	0.721	0.006212	-5.94	-4.58	-5.24	MAMDC2	MAM domain containing 2
225380_at	0.721	0.006259	-5.92	-4.58	-4.92	PKDCC	protein kinase domain containing, cytoplasmic
1553234_at	0.721	0.006306	5.91	-4.58	4.94	ADAMTS18	ADAM metallopeptidase with thrombospondin type 1 motif 18
239950_at	0.721	0.00632	-5.91	-4.58	-4.9	HOXA11-AS	HOXA11 antisense RNA
1566030_at	0.721	0.00634	5.9	-4.58	5
240530_at	0.721	0.00637	5.89	-4.58	5.47
1569602_at	0.721	0.006377	-5.89	-4.58	-4.9	KANK2	KN motif and ankyrin repeat domains 2
1556700_a_at	0.721	0.006384	5.89	-4.58	5.27
206912_at	0.721	0.006419	5.88	-4.58	4.88	FOXE1	forkhead box E1
233238_s_at	0.721	0.00644	-5.87	-4.58	-4.87	CTB-12O2.1	uncharacterized LOC101927115
235490_at	0.721	0.006449	5.87	-4.58	4.87	TMEM107	transmembrane protein 107
205902_at	0.721	0.00647	-5.86	-4.58	-6.01	KCNN3	potassium calcium-activated channel subfamily N member 3
210082_at	0.721	0.006471	5.86	-4.58	4.9	ABCA4	ATP binding cassette subfamily A member 4
1552785_at	0.721	0.006471	-5.86	-4.58	-4.92	ZNF781	zinc finger protein 781
238966_at	0.721	0.006491	5.86	-4.58	4.86	CELF4	CUGBP, Elav-like family member 4
215893_x_at	0.721	0.006495	5.86	-4.58	4.88
1552587_at	0.721	0.006498	5.86	-4.58	5.09	CNBD1	cyclic nucleotide binding domain containing 1
215035_at	0.721	0.006512	-5.85	-4.58	-5.27	IGLV6-57	immunoglobulin lambda variable 6-57
201496_x_at	0.721	0.006555	-5.84	-4.58	-5.95	MYH11	myosin heavy chain 11
50965_at	0.721	0.006562	5.84	-4.58	5.66	RAB26	RAB26, member RAS oncogene family
1556434_at	0.721	0.006565	5.84	-4.58	4.85
211738_x_at	0.721	0.006566	5.84	-4.58	4.93	CELA3A	chymotrypsin like elastase family member 3A
238847_at	0.721	0.006597	-5.83	-4.58	-6.43	HOXD10	homeobox D10
1555342_a_at	0.721	0.006604	5.83	-4.58	5.01	UNC5C	unc-5 netrin receptor C
206641_at	0.721	0.006606	-5.83	-4.58	-4.83	TNFRSF17	TNF receptor superfamily member 17
1559377_at	0.721	0.006617	-5.82	-4.58	-5
220337_at	0.721	0.006648	5.82	-4.58	4.97	NGB	neuroglobin
1553268_at	0.721	0.00666	5.81	-4.58	4.88	RHBDL3	rhomboid like 3
208281_x_at	0.721	0.006675	5.81	-4.58	5.05	DAZ4///DAZ2///DAZ3///DAZ1	deleted in azoospermia 4///deleted in azoospermia 2///deleted in azoospermia 3///deleted in azoospermia 1
232833_at	0.721	0.006703	5.8	-4.58	5.44
1569176_at	0.721	0.006743	5.79	-4.58	4.8	TMPRSS12	transmembrane protease, serine 12
216414_at	0.721	0.006778	5.78	-4.58	5.11
224220_x_at	0.721	0.006783	-5.78	-4.58	-6.18	TRPC4	transient receptor potential cation channel subfamily C member 4
237160_at	0.721	0.006787	-5.78	-4.58	-4.88	CCDC83	coiled-coil domain containing 83
237193_s_at	0.721	0.006805	-5.77	-4.58	-4.88	LOC101927668	uncharacterized LOC101927668
1565723_at	0.721	0.006811	5.77	-4.58	5.15	LOC100128281	uncharacterized LOC100128281
230671_at	0.721	0.00682	5.77	-4.58	4.79
234548_at	0.721	0.006828	-5.77	-4.58	-5.03
202448_s_at	0.721	0.006833	-5.77	-4.58	-4.79	ZER1	zyg-11 related cell cycle regulator
1564208_x_at	0.721	0.006835	-5.76	-4.58	-4.81	LINC00957	long intergenic non-protein coding RNA 957
1563845_at	0.721	0.006887	5.75	-4.58	4.77	LOC100507387///FAM153A///FAM153B	uncharacterized LOC100507387///family with sequence similarity 153 member A///family with sequence similarity 153 member B
232131_at	0.721	0.006892	-5.75	-4.58	-5.21	LINC00933	long intergenic non-protein coding RNA 933
204351_at	0.721	0.006892	5.75	-4.58	4.81	S100P	S100 calcium binding protein P
1558412_at	0.721	0.006899	5.75	-4.58	5.61	MIR1199///MISP3	microRNA 1199///MISP family member 3
214804_at	0.721	0.006906	5.75	-4.58	4.98	CENPI	centromere protein I
217400_at	0.721	0.006906	5.75	-4.58	5.36
1557012_a_at	0.721	0.006914	5.74	-4.58	4.84
206094_x_at	0.721	0.006925	5.74	-4.58	4.76	UGT1A3///UGT1A1///UGT1A4///UGT1A9///UGT1A5///UGT1A6///UGT1A7///UGT1A8///UGT1A10	UDP glucuronosyltransferase family 1 member A3///UDP glucuronosyltransferase family 1 member A1///UDP glucuronosyltransferase family 1 member A4///UDP glucuronosyltransferase family 1 member A9///UDP glucuronosyltransferase family 1 member A5///UDP glucuronosyltransferase family 1 member A6///UDP glucuronosyltransferase family 1 member A7///UDP glucuronosyltransferase family 1 member A8///UDP glu…
1556210_at	0.721	0.006962	5.73	-4.58	5.17
221286_s_at	0.721	0.00697	-5.73	-4.58	-5.28	MZB1	marginal zone B and B1 cell specific protein
1563018_at	0.721	0.006982	5.73	-4.58	4.85	TBX5	T-box 5
242054_s_at	0.721	0.007004	5.72	-4.58	7.01	SIX3	SIX homeobox 3
207523_at	0.721	0.007007	5.72	-4.58	4.77	C6orf10	chromosome 6 open reading frame 10
219491_at	0.721	0.007021	5.72	-4.58	5.27	LRFN4	leucine rich repeat and fibronectin type III domain containing 4
1556769_a_at	0.721	0.007029	5.71	-4.58	4.88	LOC105371967	uncharacterized LOC105371967
215014_at	0.721	0.007038	-5.71	-4.58	-4.74	KCND3	potassium voltage-gated channel subfamily D member 3
215317_at	0.721	0.007041	5.71	-4.58	5
204843_s_at	0.721	0.007044	5.71	-4.58	4.81	PRKAR2A	protein kinase cAMP-dependent type II regulatory subunit alpha
1552747_a_at	0.721	0.007077	5.7	-4.58	4.73	PP2D1	protein phosphatase 2C like domain containing 1
243324_x_at	0.721	0.007078	5.7	-4.58	4.87	TNPO1	transportin 1
1557871_at	0.721	0.007089	5.7	-4.58	4.72	LOC253573	uncharacterized LOC253573
214111_at	0.721	0.007116	-5.69	-4.58	-5.41	OPCML	opioid binding protein/cell adhesion molecule like
223565_at	0.721	0.007124	-5.69	-4.58	-6.43	MZB1	marginal zone B and B1 cell specific protein
207016_s_at	0.721	0.007135	-5.69	-4.58	-5.28	LOC101928635///ALDH1A2	uncharacterized LOC101928635///aldehyde dehydrogenase 1 family member A2
207709_at	0.721	0.007151	5.68	-4.58	4.88	PRKAA2	protein kinase AMP-activated catalytic subunit alpha 2
232503_at	0.721	0.007175	5.68	-4.58	5.19
206634_at	0.721	0.00718	5.68	-4.58	4.86	SIX3	SIX homeobox 3
229641_at	0.721	0.007184	-5.68	-4.58	-4.94	CCBE1	collagen and calcium binding EGF domains 1
1564264_at	0.721	0.007202	5.67	-4.58	5.29
1556304_s_at	0.721	0.007215	-5.67	-4.58	-4.9	LINC00899	long intergenic non-protein coding RNA 899
228807_at	0.721	0.007227	-5.67	-4.58	-4.87	ASPA	aspartoacylase
225977_at	0.721	0.007239	-5.66	-4.58	-5.07	PCDH18	protocadherin 18
233212_at	0.721	0.007245	5.66	-4.58	4.93
232053_x_at	0.721	0.00725	5.66	-4.58	4.72	RHBDD2	rhomboid domain containing 2
217281_x_at	0.721	0.007259	-5.66	-4.58	-5.68	LOC102725526///IGHV4-31///IGHM///IGHG3///IGHG2///IGHG1///IGHA2///IGHA1///IGH	uncharacterized LOC102725526///immunoglobulin heavy variable 4-31///immunoglobulin heavy constant mu///immunoglobulin heavy constant gamma 3 (G3m marker)///immunoglobulin heavy constant gamma 2 (G2m marker)///immunoglobulin heavy constant gamma 1 (G1m marker)///immunoglobulin heavy constant alpha 2 (A2m marker)///immunoglobulin heavy constant alpha 1///immunoglobulin heavy locus
213952_s_at	0.721	0.007261	5.66	-4.58	4.84	ALOX5	arachidonate 5-lipoxygenase
1557366_at	0.721	0.007278	-5.65	-4.58	-5.37	LOC101929141///CCDC144CP///CCDC144B///CCDC144A	coiled-coil domain-containing protein 144B-like///coiled-coil domain containing 144C, pseudogene///coiled-coil domain containing 144B (pseudogene)///coiled-coil domain containing 144A
1557689_at	0.721	0.007294	5.65	-4.58	4.78
207487_at	0.721	0.007302	5.65	-4.58	5.91
1556630_at	0.721	0.007314	5.64	-4.58	4.74	CASC2	cancer susceptibility candidate 2 (non-protein coding)
243164_s_at	0.721	0.007328	-5.64	-4.58	-5.06
206376_at	0.721	0.00734	-5.64	-4.58	-4.67	SLC6A15	solute carrier family 6 member 15
214795_at	0.721	0.007353	5.63	-4.58	5.71	ZMYND8	zinc finger MYND-type containing 8
1561969_at	0.721	0.007361	5.63	-4.58	5.1	ZPLD1	zona pellucida like domain containing 1
1554533_at	0.721	0.007417	5.62	-4.58	4.82	C2	complement component 2
216367_at	0.721	0.007422	-5.62	-4.58	-4.71	COL4A3	collagen type IV alpha 3 chain
238162_at	0.721	0.007424	-5.62	-4.58	-4.82
1555092_at	0.721	0.007433	5.62	-4.58	4.84	VASH2	vasohibin 2
1553060_at	0.721	0.007449	5.61	-4.58	4.75	PSKH2	protein serine kinase H2
205200_at	0.721	0.007464	-5.61	-4.58	-4.82	EXOSC7///CLEC3B	exosome component 7///C-type lectin domain family 3 member B
1565894_at	0.721	0.007489	5.6	-4.58	5.39
1565329_at	0.721	0.007532	5.59	-4.58	5.24	POLE4	DNA polymerase epsilon 4, accessory subunit
241014_at	0.721	0.007545	-5.59	-4.58	-5.03	FLG-AS1	FLG antisense RNA 1
231531_at	0.721	0.007599	5.58	-4.58	4.78	FANCD2OS	FANCD2 opposite strand
201249_at	0.721	0.007613	5.57	-4.58	5.13	SLC2A1	solute carrier family 2 member 1
215331_at	0.721	0.007641	5.57	-4.58	4.66	MYH15	myosin heavy chain 15
231318_at	0.721	0.007648	5.57	-4.58	4.73	DNM1P46	dynamin 1 pseudogene 46
1566970_at	0.721	0.007662	-5.56	-4.58	-5.02
231721_at	0.721	0.007685	-5.56	-4.58	-4.74	JAM3	junctional adhesion molecule 3
215101_s_at	0.721	0.007692	5.56	-4.58	4.82	CXCL5	C-X-C motif chemokine ligand 5
229759_s_at	0.721	0.007693	5.56	-4.58	5.02	VEPH1	ventricular zone expressed PH domain containing 1
229542_at	0.721	0.007708	-5.55	-4.58	-4.61	C20orf85	chromosome 20 open reading frame 85
230783_at	0.721	0.007712	-5.55	-4.58	-4.6	LOC283713///OTUD7A	uncharacterized LOC283713///OTU deubiquitinase 7A
232927_at	0.721	0.007725	5.55	-4.58	4.64
209243_s_at	0.721	0.00773	-5.55	-4.58	-4.86	PEG3	paternally expressed 3
1565976_at	0.721	0.007752	5.54	-4.58	6.25
242723_at	0.721	0.007779	5.54	-4.58	4.63
227971_at	0.721	0.007805	-5.53	-4.58	-4.58	NRK	Nik related kinase
209464_at	0.721	0.007814	5.53	-4.58	4.72	AURKB	aurora kinase B
1568925_at	0.721	0.007856	-5.52	-4.58	-4.62	MYLK3	myosin light chain kinase 3
239580_at	0.721	0.007858	-5.52	-4.58	-5.01	GUCY1A3	guanylate cyclase 1 soluble subunit alpha
215530_at	0.721	0.007875	5.51	-4.58	4.75	FANCA	Fanconi anemia complementation group A
220637_at	0.721	0.007879	-5.51	-4.58	-4.57	FAM124B	family with sequence similarity 124 member B
235909_at	0.721	0.007914	5.51	-4.58	4.59	PCBP1-AS1	PCBP1 antisense RNA 1
1553396_a_at	0.721	0.00796	5.5	-4.58	4.82	CCDC13	coiled-coil domain containing 13
1561242_at	0.721	0.007968	5.49	-4.58	4.55
242686_at	0.721	0.007978	5.49	-4.58	4.79	STARD13	StAR related lipid transfer domain containing 13
205165_at	0.721	0.007988	5.49	-4.58	4.73	CELSR3	cadherin EGF LAG seven-pass G-type receptor 3
1555397_at	0.721	0.008012	-5.49	-4.58	-4.72	MYO1D	myosin ID
204465_s_at	0.721	0.008014	5.48	-4.58	6.16	INA	internexin neuronal intermediate filament protein alpha
1562110_at	0.721	0.008015	5.48	-4.58	4.63	IWS1	IWS1, SUPT6H interacting protein
243534_at	0.721	0.008015	-5.48	-4.58	-4.66	CC2D2B	coiled-coil and C2 domain containing 2B
1558387_at	0.721	0.008018	-5.48	-4.58	-5.21	UG0898H09	uncharacterized LOC643763
239262_at	0.721	0.008022	-5.48	-4.58	-4.82
216739_at	0.721	0.008047	5.48	-4.58	4.68
230323_s_at	0.721	0.008054	5.48	-4.58	5.15	TMEM45B	transmembrane protein 45B
1569872_a_at	0.721	0.008059	-5.48	-4.58	-4.6	LMF1	lipase maturation factor 1
209408_at	0.721	0.008073	5.47	-4.58	4.62	KIF2C	kinesin family member 2C
233187_s_at	0.721	0.008074	5.47	-4.58	4.64
241951_at	0.721	0.008078	5.47	-4.58	4.82	SLCO1C1	solute carrier organic anion transporter family member 1C1
214146_s_at	0.721	0.008081	5.47	-4.58	4.55	PPBP	pro-platelet basic protein
244439_at	0.721	0.008094	5.47	-4.58	4.56	SPRED1	sprouty related EVH1 domain containing 1
205946_at	0.721	0.00811	-5.46	-4.58	-4.72	VIPR2	vasoactive intestinal peptide receptor 2
239183_at	0.721	0.008126	-5.46	-4.58	-7.8	ANGPTL1	angiopoietin like 1
216740_at	0.721	0.008161	5.45	-4.58	4.79
214974_x_at	0.721	0.008168	5.45	-4.58	4.61	CXCL5	C-X-C motif chemokine ligand 5
229406_at	0.721	0.008175	-5.45	-4.58	-5.22	RBFOX3	RNA binding protein, fox-1 homolog 3
228868_x_at	0.721	0.008205	5.44	-4.58	4.51	CDT1	chromatin licensing and DNA replication factor 1
1557642_at	0.721	0.008218	5.44	-4.58	4.61	IQCA1	IQ motif containing with AAA domain 1
1556952_at	0.721	0.008237	5.44	-4.58	4.54
207779_at	0.721	0.008269	5.43	-4.58	4.54
236718_at	0.721	0.00827	5.43	-4.58	4.55	MYO10	myosin X
242758_x_at	0.721	0.008302	5.42	-4.58	4.63	KDM3A	lysine demethylase 3A
200952_s_at	0.721	0.008323	-5.42	-4.58	-4.53	CCND2	cyclin D2
219144_at	0.721	0.008356	-5.41	-4.58	-5.19	DUSP26	dual specificity phosphatase 26 (putative)
1568596_a_at	0.721	0.008358	5.41	-4.58	4.95	TROAP	trophinin associated protein
210842_at	0.721	0.008364	5.41	-4.58	4.91	NRP2	neuropilin 2
231189_at	0.721	0.008419	5.4	-4.58	4.54	LINC01126	long intergenic non-protein coding RNA 1126
230058_at	0.721	0.008446	5.39	-4.58	4.58	SDCCAG3	serologically defined colon cancer antigen 3
1570430_at	0.721	0.008483	-5.39	-4.58	-4.49
1564150_a_at	0.721	0.008488	5.39	-4.58	4.68	LINC01619	long intergenic non-protein coding RNA 1619
207550_at	0.721	0.00849	-5.39	-4.58	-4.7	MPL	MPL proto-oncogene, thrombopoietin receptor
220487_at	0.721	0.008525	-5.38	-4.58	-5.42	SNTG2	syntrophin gamma 2
215379_x_at	0.721	0.008546	-5.37	-4.58	-5.21	IGLV1-44	immunoglobulin lambda variable 1-44
222717_at	0.721	0.008552	-5.37	-4.58	-4.77	SDPR	serum deprivation response
211039_at	0.721	0.008564	5.37	-4.58	4.46	CHRNA1	cholinergic receptor nicotinic alpha 1 subunit
1554072_s_at	0.721	0.00857	5.37	-4.58	4.96	DEUP1	deuterosome assembly protein 1
240365_at	0.721	0.008573	5.37	-4.58	4.72	MIR924HG	MIR924 host gene
242605_at	0.721	0.008578	-5.37	-4.58	-4.45	DCN	decorin
238914_at	0.721	0.008581	5.37	-4.58	4.5	DCC	DCC netrin 1 receptor
206440_at	0.721	0.008588	-5.37	-4.58	-4.47	LIN7A	lin-7 homolog A, crumbs cell polarity complex component
1553191_at	0.721	0.008611	-5.36	-4.58	-4.45	DST	dystonin
209138_x_at	0.721	0.008615	-5.36	-4.58	-5.4	IGLC1	immunoglobulin lambda constant 1
240630_at	0.721	0.00862	5.36	-4.58	4.5
219652_s_at	0.721	0.00862	-5.36	-4.58	-4.47	CXorf36	chromosome X open reading frame 36
230784_at	0.721	0.008625	5.36	-4.58	4.45	PRAC1	prostate cancer susceptibility candidate 1
236945_at	0.721	0.008645	-5.36	-4.58	-4.48	CCDC171	coiled-coil domain containing 171
206281_at	0.721	0.008647	-5.35	-4.58	-5.95	ADCYAP1	adenylate cyclase activating polypeptide 1
1560422_at	0.721	0.008662	5.35	-4.58	4.84
1559725_at	0.721	0.008669	5.35	-4.58	4.44	LINC01537	long intergenic non-protein coding RNA 1537
1567860_at	0.721	0.008684	-5.35	-4.58	-4.56
1564760_at	0.721	0.008698	5.34	-4.58	4.43
240832_at	0.721	0.008698	-5.34	-4.58	-4.79
1559606_at	0.721	0.008713	-5.34	-4.58	-4.7	GBP6	guanylate binding protein family member 6
224181_at	0.721	0.008734	5.34	-4.58	4.44	LINC00470	long intergenic non-protein coding RNA 470
202755_s_at	0.721	0.008764	5.33	-4.58	4.76	GPC1	glypican 1
220156_at	0.721	0.008777	-5.33	-4.58	-4.44	EFCAB1	EF-hand calcium binding domain 1
244561_at	0.721	0.008809	5.32	-4.58	4.94	SLC9A1	solute carrier family 9 member A1
222317_at	0.721	0.008835	5.32	-4.58	4.41	PDE3B	phosphodiesterase 3B
230867_at	0.721	0.00889	-5.31	-4.58	-4.84	COL6A6	collagen type VI alpha 6 chain
231034_s_at	0.721	0.008926	5.3	-4.58	4.47	NHSL1	NHS like 1
204931_at	0.721	0.008933	-5.3	-4.58	-4.85	TCF21	transcription factor 21
1555234_a_at	0.721	0.008967	-5.29	-4.58	-4.72	RHOJ	ras homolog family member J
1557180_at	0.721	0.00897	-5.29	-4.58	-4.97	C11orf87	chromosome 11 open reading frame 87
211805_s_at	0.721	0.008976	5.29	-4.58	5.01	SLC8A1	solute carrier family 8 member A1
240536_at	0.721	0.008994	5.29	-4.58	4.4
239782_at	0.721	0.009009	-5.29	-4.58	-4.4	RBP1	retinol binding protein 1
241673_x_at	0.721	0.009015	-5.28	-4.58	-4.91
214294_at	0.721	0.009022	5.28	-4.58	4.38	KIAA0485	uncharacterized LOC57235
236373_at	0.721	0.009044	-5.28	-4.58	-5.45
221296_at	0.721	0.009051	5.28	-4.58	4.41	TECTA	tectorin alpha
221584_s_at	0.721	0.009059	-5.28	-4.58	-4.5	KCNMA1	potassium calcium-activated channel subfamily M alpha 1
234170_at	0.721	0.00906	5.28	-4.58	4.58
1556541_s_at	0.721	0.009068	-5.28	-4.58	-4.49
1563693_at	0.721	0.00908	-5.27	-4.58	-4.38
1552721_a_at	0.721	0.009088	-5.27	-4.58	-4.52	FGF1	fibroblast growth factor 1
220024_s_at	0.721	0.0091	-5.27	-4.58	-4.43	PRX	periaxin
1556698_a_at	0.721	0.0091	5.27	-4.58	5.1	GPRIN3	GPRIN family member 3
244005_at	0.721	0.009109	5.27	-4.58	4.64
1562049_at	0.721	0.009124	-5.26	-4.58	-5.43	LOC101927734	uncharacterized LOC101927734
239822_at	0.721	0.009125	-5.26	-4.58	-4.55	LINC01354	long intergenic non-protein coding RNA 1354
215725_at	0.721	0.00913	5.26	-4.58	4.36	DGCR11	DiGeorge syndrome critical region gene 11 (non-protein coding)
232760_at	0.721	0.009132	-5.26	-4.58	-5.12	TEX15	testis expressed 15
1569337_at	0.721	0.009153	-5.26	-4.58	-4.37	SLC5A9	solute carrier family 5 member 9
1558795_at	0.721	0.009153	-5.26	-4.58	-4.44	LOC101928307	uncharacterized LOC101928307
220884_at	0.721	0.00916	5.26	-4.58	5.39
241892_at	0.721	0.009163	5.26	-4.58	4.39	NCL	nucleolin
219978_s_at	0.721	0.009184	5.25	-4.58	4.4	NUSAP1	nucleolar and spindle associated protein 1
210390_s_at	0.721	0.009202	-5.25	-4.58	-4.51	CCL15-CCL14///CCL15	CCL15-CCL14 readthrough (NMD candidate)///C-C motif chemokine ligand 15
1566284_at	0.721	0.009212	5.25	-4.58	4.79
237255_at	0.721	0.009227	5.25	-4.58	4.37	LINC01272	long intergenic non-protein coding RNA 1272
1561262_at	0.721	0.009228	5.25	-4.58	4.62	LINC01516	long intergenic non-protein coding RNA 1516
1563032_at	0.721	0.009229	-5.25	-4.58	-4.38
243738_at	0.721	0.009236	-5.24	-4.58	-4.35	NMNAT3	nicotinamide nucleotide adenylyltransferase 3
1554700_at	0.721	0.009239	-5.24	-4.58	-4.46	CDH7	cadherin 7
211506_s_at	0.721	0.009244	5.24	-4.58	5.19	CXCL8	C-X-C motif chemokine ligand 8
1568870_at	0.721	0.009277	5.24	-4.58	4.98	SLC24A4	solute carrier family 24 member 4
238745_at	0.721	0.009285	5.24	-4.58	4.49
1564767_at	0.721	0.009292	-5.23	-4.58	-4.35
230754_at	0.721	0.009304	-5.23	-4.58	-4.34	ZBTB38	zinc finger and BTB domain containing 38
208529_at	0.721	0.009306	5.23	-4.58	4.56	BTF3P11	basic transcription factor 3 pseudogene 11
1558769_s_at	0.721	0.009332	5.23	-4.58	4.33	DNAH1	dynein axonemal heavy chain 1
206026_s_at	0.721	0.009333	5.23	-4.58	4.39	TNFAIP6	TNF alpha induced protein 6
216147_at	0.721	0.009339	5.23	-4.58	4.41
1556364_at	0.721	0.009354	-5.22	-4.58	-4.56	ADAMTS9-AS2	ADAMTS9 antisense RNA 2
202018_s_at	0.721	0.009357	-5.22	-4.58	-5.08	LTF	lactotransferrin
239118_at	0.721	0.00936	-5.22	-4.58	-4.49	KCNA2	potassium voltage-gated channel subfamily A member 2
1563969_at	0.721	0.009383	-5.22	-4.58	-4.35	FLJ33360	FLJ33360 protein
237341_at	0.721	0.009397	5.22	-4.58	4.34
1557560_at	0.721	0.00941	-5.21	-4.58	-4.34	DSE	dermatan sulfate epimerase
220269_at	0.721	0.009415	-5.21	-4.58	-4.58	ZBBX	zinc finger B-box domain containing
237578_at	0.721	0.009418	-5.21	-4.58	-4.37
1558680_s_at	0.721	0.009425	-5.21	-4.58	-4.85	PDE1A	phosphodiesterase 1A
218207_s_at	0.721	0.009435	5.21	-4.58	4.41	STMN3	stathmin 3
1553970_s_at	0.721	0.00944	-5.21	-4.58	-4.34	CEL	carboxyl ester lipase
212023_s_at	0.721	0.009448	5.21	-4.58	4.56	MKI67	marker of proliferation Ki-67
240641_at	0.721	0.009455	-5.21	-4.58	-4.67
207850_at	0.721	0.009457	5.21	-4.58	5.62	CXCL3	C-X-C motif chemokine ligand 3
210572_at	0.721	0.009461	-5.2	-4.58	-4.62	PCDHA2///PCDHA3	protocadherin alpha 2///protocadherin alpha 3
1563907_at	0.721	0.009474	5.2	-4.58	4.34	GARNL3	GTPase activating Rap/RanGAP domain like 3
235512_at	0.721	0.009478	-5.2	-4.58	-4.31	CDKL1	cyclin dependent kinase like 1
206262_at	0.721	0.009488	-5.2	-4.58	-7.52	ADH1C	alcohol dehydrogenase 1C (class I), gamma polypeptide
214682_at	0.721	0.00949	-5.2	-4.58	-4.31	PKD1P1	polycystin 1, transient receptor potential channel interacting pseudogene 1
242473_at	0.721	0.009496	5.2	-4.58	4.87	TRAF4	TNF receptor associated factor 4
233286_at	0.721	0.009514	-5.2	-4.58	-4.41
1564699_at	0.721	0.009517	-5.19	-4.58	-4.37
210611_s_at	0.721	0.009535	-5.19	-4.58	-5.22	DTNA	dystrobrevin alpha
211661_x_at	0.721	0.009538	5.19	-4.58	6.27	PTAFR	platelet activating factor receptor
1553486_a_at	0.721	0.009552	-5.19	-4.58	-4.33	C17orf78	chromosome 17 open reading frame 78
211639_x_at	0.721	0.009556	-5.19	-4.58	-4.52	IGHV4-31///IGHM///IGHG4///IGHG3///IGHG1///IGHD///IGHA2///IGHA1///IGH	immunoglobulin heavy variable 4-31///immunoglobulin heavy constant mu///immunoglobulin heavy constant gamma 4 (G4m marker)///immunoglobulin heavy constant gamma 3 (G3m marker)///immunoglobulin heavy constant gamma 1 (G1m marker)///immunoglobulin heavy constant delta///immunoglobulin heavy constant alpha 2 (A2m marker)///immunoglobulin heavy constant alpha 1///immunoglobulin heavy locus
210815_s_at	0.721	0.00956	-5.19	-4.58	-4.54	CALCRL	calcitonin receptor like receptor
237717_x_at	0.721	0.009564	-5.19	-4.58	-4.37
1561513_at	0.721	0.009576	-5.18	-4.58	-5.35	LOC101927310	uncharacterized LOC101927310
1568902_at	0.721	0.0096	5.18	-4.58	4.34
1560516_at	0.721	0.0096	5.18	-4.58	4.31	TMEM26-AS1	TMEM26 antisense RNA 1
1565738_at	0.721	0.009602	-5.18	-4.58	-4.63	SCTR	secretin receptor
210619_s_at	0.721	0.009604	-5.18	-4.58	-5.06	HYAL1	hyaluronoglucosaminidase 1
1557107_at	0.721	0.009629	-5.18	-4.58	-4.69	SLC26A4-AS1	SLC26A4 antisense RNA 1
229649_at	0.721	0.009643	-5.17	-4.58	-6.55	NRXN3	neurexin 3
210846_x_at	0.721	0.009655	5.17	-4.58	5.32	TRIM14	tripartite motif containing 14
206103_at	0.721	0.009666	5.17	-4.58	4.37	RAC3	ras-related C3 botulinum toxin substrate 3 (rho family, small GTP binding protein Rac3)
232238_at	0.721	0.009682	5.17	-4.58	4.47	ASPM	abnormal spindle microtubule assembly
241128_at	0.721	0.009693	-5.16	-4.58	-4.3
201957_at	0.721	0.009695	-5.16	-4.58	-4.35	PPP1R12B	protein phosphatase 1 regulatory subunit 12B
228508_at	0.721	0.00975	-5.16	-4.58	-4.39	MAML3	mastermind like transcriptional coactivator 3
230467_at	0.721	0.009783	5.15	-4.58	5.5	TMEM52	transmembrane protein 52
206577_at	0.721	0.009798	-5.15	-4.58	-4.27	VIP	vasoactive intestinal peptide
216738_at	0.721	0.009813	5.14	-4.58	4.28
1567377_at	0.721	0.009819	5.14	-4.58	4.39	DNAH1	dynein axonemal heavy chain 1
211557_x_at	0.721	0.009833	5.14	-4.58	4.59	SLCO2B1	solute carrier organic anion transporter family member 2B1
231778_at	0.721	0.009834	5.14	-4.58	4.36	DLX3	distal-less homeobox 3
1562969_at	0.721	0.009856	5.14	-4.58	4.51	DNMBP	dynamin binding protein
1568812_at	0.721	0.009875	5.13	-4.58	4.39	LOC100507140	uncharacterized LOC100507140
214884_at	0.721	0.009876	-5.13	-4.58	-4.26	MCF2	MCF.2 cell line derived transforming sequence
213974_at	0.721	0.009877	-5.13	-4.58	-4.28	ADAMTSL3	ADAMTS like 3
206622_at	0.721	0.009885	-5.13	-4.58	-4.32	TRH	thyrotropin releasing hormone
1566301_at	0.721	0.009899	-5.13	-4.58	-4.34	PPP1R11	protein phosphatase 1 regulatory inhibitor subunit 11
1569290_s_at	0.721	0.0099	-5.13	-4.58	-4.59	GRIA3	glutamate ionotropic receptor AMPA type subunit 3
210084_x_at	0.721	0.009906	-5.13	-4.58	-4.25	TPSAB1	tryptase alpha/beta 1
1555352_at	0.721	0.009912	-5.13	-4.58	-4.77	FOXP2	forkhead box P2
1556328_at	0.721	0.009924	-5.13	-4.58	-4.28	PCDH10	protocadherin 10
210892_s_at	0.721	0.009924	5.13	-4.58	4.55	GTF2I	general transcription factor IIi
1569663_at	0.721	0.009935	-5.12	-4.58	-4.39
236928_at	0.721	0.009943	-5.12	-4.58	-4.28
1568687_s_at	0.721	0.009965	-5.12	-4.58	-4.28	ATP8B5P	ATPase phospholipid transporting 8B5, pseudogene
1566437_at	0.721	0.009981	5.12	-4.58	4.36	LOC283475	uncharacterized LOC283475
225714_s_at	0.721	0.009988	5.12	-4.58	4.38
213953_at	0.721	0.009993	5.11	-4.58	4.28	KRT20	keratin 20
1553126_a_at	0.721	0.009997	-5.11	-4.58	-4.41	SLC39A12	solute carrier family 39 member 12
223813_at	0.721	0.010001	-5.11	-4.58	-4.46	PRND	prion protein 2 (dublet)
205254_x_at	0.721	0.010051	5.11	-4.58	4.23	TCF7	transcription factor 7 (T-cell specific, HMG-box)
232977_x_at	0.721	0.010079	5.1	-4.58	4.78	MYH14	myosin, heavy chain 14, non-muscle
215715_at	0.721	0.010091	-5.1	-4.58	-4.69	SLC6A2	solute carrier family 6 member 2
1557468_at	0.721	0.010094	5.1	-4.58	4.27
210035_s_at	0.721	0.010098	-5.1	-4.58	-4.27	SNORA66///RPL5///SNORD21	small nucleolar RNA, H/ACA box 66///ribosomal protein L5///small nucleolar RNA, C/D box 21
216953_s_at	0.721	0.010103	-5.1	-4.58	-6	WT1	Wilms tumor 1
211786_at	0.721	0.010127	5.09	-4.58	4.34	TNFRSF9	TNF receptor superfamily member 9
234346_x_at	0.721	0.010133	5.09	-4.58	4.36
220356_at	0.721	0.010134	-5.09	-4.58	-4.22	CORIN	corin, serine peptidase
232069_at	0.721	0.010143	-5.09	-4.58	-4.64	KIF26A	kinesin family member 26A
240190_at	0.721	0.010145	5.09	-4.58	5.25
1570388_a_at	0.721	0.010159	5.09	-4.58	4.68	LOC101929800///LOC101927424///LOC440896	putative uncharacterized protein FLJ45355///uncharacterized LOC101927424///uncharacterized LOC440896
211897_s_at	0.721	0.010163	-5.09	-4.58	-4.46	CRHR1	corticotropin releasing hormone receptor 1
235560_at	0.721	0.010173	-5.09	-4.58	-4.22	NOVA2	NOVA alternative splicing regulator 2
240909_at	0.721	0.01023	5.08	-4.58	4.34
243010_at	0.721	0.010236	5.08	-4.58	4.21	MSI2	musashi RNA binding protein 2
227949_at	0.721	0.010242	-5.07	-4.58	-4.85	PHACTR3	phosphatase and actin regulator 3
233577_at	0.721	0.010242	-5.07	-4.58	-4.9
1566449_at	0.721	0.010246	-5.07	-4.58	-4.25	LRRC7	leucine rich repeat containing 7
206638_at	0.721	0.010258	-5.07	-4.58	-5.22	HTR2B	5-hydroxytryptamine receptor 2B
210147_at	0.721	0.010276	-5.07	-4.58	-4.55	ART3	ADP-ribosyltransferase 3
206022_at	0.721	0.010277	-5.07	-4.58	-4.76	NDP	NDP, norrin cystine knot growth factor
232043_at	0.721	0.010307	5.06	-4.58	4.22	GNG7	G protein subunit gamma 7
1553146_at	0.721	0.010312	-5.06	-4.58	-4.33	C3orf30	chromosome 3 open reading frame 30
236436_at	0.721	0.010315	5.06	-4.58	4.92	SLC25A45	solute carrier family 25 member 45
206784_at	0.721	0.010331	-5.06	-4.58	-4.19	AQP8	aquaporin 8
229728_at	0.721	0.010338	-5.06	-4.58	-4.19
1554636_at	0.721	0.010353	5.06	-4.58	4.49
239552_at	0.721	0.010359	5.06	-4.58	5.3	VWDE	von Willebrand factor D and EGF domains
1570366_x_at	0.721	0.010364	5.06	-4.58	4.25	ZNF709	zinc finger protein 709
206489_s_at	0.721	0.010367	5.06	-4.58	4.19	DLGAP1	DLG associated protein 1
1570133_at	0.721	0.010393	5.05	-4.58	4.2
231805_at	0.721	0.010394	-5.05	-4.58	-4.33	PRLHR	prolactin releasing hormone receptor
241057_x_at	0.721	0.010422	5.05	-4.58	4.22
231543_at	0.721	0.010438	5.04	-4.58	4.19	PLEKHA8	pleckstrin homology domain containing A8
1566697_at	0.721	0.010461	5.04	-4.58	4.39
229301_at	0.721	0.010464	5.04	-4.58	4.24	TUG1	taurine up-regulated 1 (non-protein coding)
204357_s_at	0.721	0.010465	5.04	-4.58	4.29	LIMK1	LIM domain kinase 1
207553_at	0.721	0.010466	5.04	-4.58	5.89	OPRK1	opioid receptor kappa 1
232878_at	0.721	0.01047	-5.04	-4.58	-4.73	NR2F2-AS1	NR2F2 antisense RNA 1
239953_at	0.721	0.010492	5.04	-4.58	4.37	ENTPD6	ectonucleoside triphosphate diphosphohydrolase 6 (putative)
231372_at	0.721	0.010494	5.04	-4.58	4.17	SLC25A48	solute carrier family 25 member 48
209982_s_at	0.721	0.010507	-5.03	-4.58	-4.29	NRXN2	neurexin 2
216612_x_at	0.721	0.010514	5.03	-4.58	5.33
220697_at	0.721	0.010527	-5.03	-4.58	-4.78
1559134_a_at	0.721	0.010542	-5.03	-4.58	-4.64	ZNF546	zinc finger protein 546
1554518_at	0.721	0.010548	5.03	-4.58	4.23	GSTCD	glutathione S-transferase C-terminal domain containing
233239_at	0.721	0.010555	5.03	-4.58	4.21
243559_at	0.721	0.010574	5.02	-4.58	5.18
1557252_at	0.721	0.010657	5.01	-4.58	4.85
1562691_at	0.721	0.010663	-5.01	-4.58	-4.35	FGF10-AS1	FGF10 antisense RNA 1
240337_at	0.721	0.010698	-5	-4.58	-4.6	RHOA	ras homolog family member A
1554158_at	0.721	0.010704	5	-4.58	4.2	ZMYND11	zinc finger MYND-type containing 11
227434_at	0.721	0.010722	-5	-4.58	-4.24	WBSCR17	Williams-Beuren syndrome chromosome region 17
1565729_at	0.721	0.010723	5	-4.58	4.51
217048_at	0.721	0.010725	5	-4.58	4.2	SHC1P1	SHC adaptor protein 1 pseudogene 1
222265_at	0.721	0.010764	5	-4.58	4.18	TNS4	tensin 4
219370_at	0.721	0.010765	-4.99	-4.58	-5.13	RPRM	reprimo, TP53 dependent G2 arrest mediator candidate
217139_at	0.721	0.010768	4.99	-4.58	4.58	VDAC1	voltage dependent anion channel 1
223660_at	0.721	0.010772	4.99	-4.58	4.28	ADORA3	adenosine A3 receptor
1554793_at	0.721	0.010782	4.99	-4.58	5.07	UBE3C	ubiquitin protein ligase E3C
237109_at	0.721	0.010805	4.99	-4.58	5.15	TOM1L2	target of myb1 like 2 membrane trafficking protein
233972_s_at	0.721	0.010824	-4.99	-4.58	-4.2	FEZF2	FEZ family zinc finger 2
236175_at	0.721	0.010864	4.98	-4.58	4.25	TRIM55	tripartite motif containing 55
220365_at	0.721	0.010868	4.98	-4.58	4.21	ALLC	allantoicase
1557652_a_at	0.721	0.010872	4.98	-4.58	4.15	CCDC13-AS1	CCDC13 antisense RNA 1
219308_s_at	0.721	0.010873	4.98	-4.58	4.68	AK5	adenylate kinase 5
1564052_at	0.721	0.010882	4.98	-4.58	4.13	TREML4	triggering receptor expressed on myeloid cells like 4
224126_at	0.721	0.01089	-4.98	-4.58	-4.31	SLC10A7	solute carrier family 10 member 7
202287_s_at	0.721	0.010894	4.98	-4.58	4.42	TACSTD2	tumor-associated calcium signal transducer 2
217397_at	0.721	0.010908	4.97	-4.58	4.15	YME1L1	YME1 like 1 ATPase
214528_s_at	0.721	0.01091	4.97	-4.58	4.69	PAX8	paired box 8
234196_at	0.721	0.010912	4.97	-4.58	5.42
209010_s_at	0.721	0.010932	4.97	-4.58	4.13	TRIO	trio Rho guanine nucleotide exchange factor
232505_at	0.721	0.010949	4.97	-4.58	4.21	DCTN2	dynactin subunit 2
215939_at	0.721	0.010952	4.97	-4.58	4.19
214609_at	0.721	0.010953	4.97	-4.58	4.13	PHOX2A	paired like homeobox 2a
216622_at	0.721	0.010971	-4.96	-4.58	-4.12	LAMB4	laminin subunit beta 4
238382_x_at	0.721	0.01098	4.96	-4.58	4.84
1553847_a_at	0.721	0.010987	4.96	-4.58	4.53	SPERT	spermatid associated
243813_at	0.721	0.010998	4.96	-4.58	4.81	LINC00968	long intergenic non-protein coding RNA 968
243027_at	0.721	0.011	-4.96	-4.58	-4.74	IGSF5	immunoglobulin superfamily member 5
231892_at	0.721	0.011006	4.96	-4.58	4.16	ARHGEF39	Rho guanine nucleotide exchange factor 39
217150_s_at	0.721	0.011031	4.96	-4.58	4.53	NF2	neurofibromin 2
1560806_at	0.721	0.011043	4.95	-4.58	4.9	LOC646743///TISP43	uncharacterized LOC646743///uncharacterized LOC150527
231709_x_at	0.721	0.011049	-4.95	-4.58	-4.23
238526_at	0.721	0.011075	4.95	-4.58	4.66	RAB3IP	RAB3A interacting protein
1556377_s_at	0.721	0.011093	4.95	-4.58	4.1	LMO7	LIM domain 7
236037_at	0.721	0.011096	4.95	-4.58	4.1	ARFGEF3	ARFGEF family member 3
242385_at	0.721	0.011099	-4.95	-4.58	-4.65	RORB	RAR related orphan receptor B
211020_at	0.721	0.011133	4.94	-4.58	4.13	GCNT2	glucosaminyl (N-acetyl) transferase 2, I-branching enzyme (I blood group)
239410_at	0.721	0.011148	4.94	-4.58	4.25	HK2	hexokinase 2
203438_at	0.721	0.011167	4.94	-4.58	4.62	STC2	stanniocalcin 2
234976_x_at	0.721	0.011168	4.94	-4.58	4.26	MTHFD2	methylenetetrahydrofolate dehydrogenase (NADP+ dependent) 2, methenyltetrahydrofolate cyclohydrolase
229212_at	0.721	0.011185	4.93	-4.58	4.68
204750_s_at	0.721	0.011191	4.93	-4.58	4.25	DSC2	desmocollin 2
214993_at	0.721	0.011192	4.93	-4.58	4.28	ASPHD1	aspartate beta-hydroxylase domain containing 1
219780_at	0.721	0.0112	-4.93	-4.58	-4.14	ZNF771	zinc finger protein 771
234798_x_at	0.721	0.011202	-4.93	-4.58	-4.3
215167_at	0.721	0.011237	4.93	-4.58	4.11	MED14	mediator complex subunit 14
223666_at	0.721	0.011247	4.93	-4.58	4.34	SNX5	sorting nexin 5
206876_at	0.721	0.011261	-4.92	-4.58	-4.79	SIM1	single-minded family bHLH transcription factor 1
1557548_at	0.721	0.011281	-4.92	-4.58	-4.37	PRR26	proline rich 26
242524_at	0.721	0.011281	-4.92	-4.58	-4.97	CBLN4	cerebellin 4 precursor
244745_at	0.721	0.011282	-4.92	-4.58	-5.18	RERG	RAS like estrogen regulated growth inhibitor
1559699_at	0.721	0.011309	-4.92	-4.58	-4.11
205433_at	0.721	0.011321	-4.91	-4.58	-7.36	BCHE	butyrylcholinesterase
221627_at	0.721	0.011353	4.91	-4.58	4.11	TRIM10	tripartite motif containing 10
208353_x_at	0.721	0.011358	4.91	-4.58	5.36	ANK1	ankyrin 1
1565820_x_at	0.721	0.01136	-4.91	-4.58	-4.37
211877_s_at	0.721	0.011377	-4.91	-4.58	-4.07	PCDHGA11///PCDHGC3	protocadherin gamma subfamily A, 11///protocadherin gamma subfamily C, 3
241612_at	0.721	0.011396	-4.9	-4.58	-4.07	FOXD3	forkhead box D3
208368_s_at	0.721	0.011402	4.9	-4.58	5	BRCA2	BRCA2, DNA repair associated
1559393_at	0.721	0.011412	4.9	-4.58	5.02	ALDH1L2	aldehyde dehydrogenase 1 family member L2
206067_s_at	0.721	0.011413	-4.9	-4.58	-4.34	WT1	Wilms tumor 1
1560204_at	0.721	0.01142	4.9	-4.58	4.46	NT5DC4	5'-nucleotidase domain containing 4
1566041_at	0.721	0.011447	4.9	-4.58	4.29
216314_at	0.721	0.011447	4.9	-4.58	4.12	CRISP1	cysteine rich secretory protein 1
229252_at	0.721	0.011451	4.9	-4.58	4.18	ATG9B	autophagy related 9B
1569770_x_at	0.721	0.011477	-4.89	-4.58	-4.11
1562367_at	0.721	0.011478	-4.89	-4.58	-4.08	C15orf54	chromosome 15 open reading frame 54
228072_at	0.721	0.011503	4.89	-4.58	5.24	SYT12	synaptotagmin 12
209777_s_at	0.721	0.011503	4.89	-4.58	4.08	SLC19A1	solute carrier family 19 member 1
222178_s_at	0.721	0.011517	-4.89	-4.58	-4.43
1560997_at	0.721	0.011529	-4.89	-4.58	-4.17
1556625_a_at	0.721	0.011533	4.89	-4.58	4.06
1556666_a_at	0.721	0.011552	-4.88	-4.58	-4.32	TTC6	tetratricopeptide repeat domain 6
234348_at	0.721	0.011574	-4.88	-4.58	-4.05
242533_at	0.721	0.011579	4.88	-4.58	4.08	LMF1	lipase maturation factor 1
1553470_at	0.721	0.011587	4.88	-4.58	4.55	DNAH17	dynein axonemal heavy chain 17
1560467_at	0.721	0.011599	4.88	-4.58	4.25	PAQR9	progestin and adipoQ receptor family member 9
1552912_a_at	0.721	0.011599	4.88	-4.58	4.1	IL23R	interleukin 23 receptor
201148_s_at	0.721	0.011615	-4.87	-4.58	-4.38	TIMP3	TIMP metallopeptidase inhibitor 3
243528_at	0.721	0.011621	4.87	-4.58	4.59
241457_at	0.721	0.011623	-4.87	-4.58	-4.22
216010_x_at	0.721	0.011632	4.87	-4.58	4.06	FUT3	fucosyltransferase 3 (Lewis blood group)
1569099_at	0.721	0.011634	-4.87	-4.58	-4.2	LOC101929450	uncharacterized LOC101929450
215488_at	0.721	0.011635	4.87	-4.58	4.14
235417_at	0.721	0.011663	4.87	-4.58	4.16	SPOCD1	SPOC domain containing 1
227703_s_at	0.721	0.011664	-4.87	-4.58	-4.11	SYTL4	synaptotagmin like 4
234308_at	0.721	0.011679	4.87	-4.58	4.23	TUBGCP6	tubulin gamma complex associated protein 6
1570336_at	0.721	0.011697	4.86	-4.58	4.77	BDH1	3-hydroxybutyrate dehydrogenase, type 1
217105_at	0.721	0.011698	-4.86	-4.58	-5.02
238464_at	0.721	0.011712	4.86	-4.58	4.39	ANKRD36	ankyrin repeat domain 36
215660_s_at	0.721	0.011712	4.86	-4.58	4.41	MAST2	microtubule associated serine/threonine kinase 2
216031_x_at	0.721	0.011722	4.86	-4.58	6.21	HN1L	hematological and neurological expressed 1 like
241500_at	0.721	0.01173	-4.86	-4.58	-4.54	CDH8	cadherin 8
220749_at	0.721	0.011732	4.86	-4.58	4.07	CCDC7	coiled-coil domain containing 7
229177_at	0.721	0.011753	-4.86	-4.58	-4.03	C16orf89	chromosome 16 open reading frame 89
1568722_at	0.721	0.011756	4.86	-4.58	4.14	LOC101928909	uncharacterized LOC101928909
1565905_at	0.721	0.011782	4.85	-4.58	4.11	LOC400627	uncharacterized LOC400627
1557326_at	0.721	0.011787	-4.85	-4.58	-6.6
237234_at	0.721	0.011792	4.85	-4.58	4.28	CYTH2	cytohesin 2
241509_at	0.721	0.01181	-4.85	-4.58	-4.77
224311_s_at	0.721	0.01182	4.85	-4.58	4.02	CAB39	calcium binding protein 39
238018_at	0.721	0.01182	-4.85	-4.58	-5.02	FAM150B	family with sequence similarity 150 member B
232574_at	0.721	0.011836	4.85	-4.58	4.02	XYLT1	xylosyltransferase 1
232771_at	0.721	0.011839	-4.84	-4.58	-4.01	NRK	Nik related kinase
233370_at	0.721	0.011855	-4.84	-4.58	-4.06
216491_x_at	0.721	0.011867	-4.84	-4.58	-4.02	IGHM	immunoglobulin heavy constant mu
1568981_at	0.721	0.01187	4.84	-4.58	4.23
220627_at	0.721	0.011886	-4.84	-4.58	-4.09	CST8	cystatin 8
1560522_at	0.721	0.011913	4.83	-4.58	4.22	DLGAP1-AS3	DLGAP1 antisense RNA 3
205679_x_at	0.721	0.011926	4.83	-4.58	4.07	ACAN	aggrecan
201843_s_at	0.721	0.011931	-4.83	-4.58	-4.01	EFEMP1	EGF containing fibulin like extracellular matrix protein 1
217513_at	0.721	0.011937	4.83	-4.58	5.74	MILR1	mast cell immunoglobulin like receptor 1
229971_at	0.721	0.011963	4.83	-4.58	4.72	ADGRG5	adhesion G protein-coupled receptor G5
219965_s_at	0.721	0.011963	4.83	-4.58	4.73	MAGIX	MAGI family member, X-linked
224053_s_at	0.721	0.011981	4.83	-4.58	4.28	SLC4A9	solute carrier family 4 member 9
1565936_a_at	0.721	0.01199	-4.83	-4.58	-4.73	LMO3	LIM domain only 3
233597_at	0.721	0.01199	4.83	-4.58	4.55	PNPLA5	patatin like phospholipase domain containing 5
231699_at	0.721	0.011991	4.82	-4.58	4.16	NFKBIA	NFKB inhibitor alpha
201907_x_at	0.721	0.012	4.82	-4.58	4.09	DVL3	dishevelled segment polarity protein 3
1566599_at	0.721	0.012007	4.82	-4.58	4.05
207766_at	0.721	0.012011	-4.82	-4.58	-4.74	CDKL1	cyclin dependent kinase like 1
1554766_s_at	0.721	0.012033	4.82	-4.58	4.25
244467_at	0.721	0.012034	4.82	-4.58	4.33	SHISA8	shisa family member 8
210484_s_at	0.721	0.012035	4.82	-4.58	4.94	LOC254896///TNFRSF10C	uncharacterized LOC254896///TNF receptor superfamily member 10c
238636_at	0.721	0.012065	-4.82	-4.58	-5.01	CACNA1C	calcium voltage-gated channel subunit alpha1 C
1562000_at	0.721	0.012067	4.82	-4.58	4.04	LOC400620	uncharacterized LOC400620
1566896_at	0.721	0.012071	-4.81	-4.58	-4.03	SPPL3	signal peptide peptidase like 3
210909_x_at	0.721	0.012082	4.81	-4.58	4.04	LPAL2	lipoprotein(a) like 2, pseudogene
216124_at	0.721	0.012085	-4.81	-4.58	-4.36
218790_s_at	0.721	0.012102	4.81	-4.58	4.01	TMLHE	trimethyllysine hydroxylase, epsilon
227183_at	0.721	0.012134	-4.81	-4.58	-7.39	CARMN///MIR145	cardiac mesoderm enhancer-associated non-coding RNA///microRNA 145
222546_s_at	0.721	0.012135	4.81	-4.58	4	EPS8L2	EPS8 like 2
1555256_at	0.721	0.012137	4.81	-4.58	4.1	EVC2	EvC ciliary complex subunit 2
217280_x_at	0.721	0.012162	-4.8	-4.58	-4.35	GABRA5	gamma-aminobutyric acid type A receptor alpha5 subunit
241882_at	0.721	0.012169	4.8	-4.58	4.04	CAMTA1	calmodulin binding transcription activator 1
233634_at	0.721	0.012173	4.8	-4.58	4.95	MARVELD3	MARVEL domain containing 3
221854_at	0.721	0.012197	4.8	-4.58	3.99	PKP1	plakophilin 1
236020_s_at	0.721	0.0122	4.8	-4.58	4.13	TRUB1	TruB pseudouridine synthase family member 1
1570235_at	0.721	0.012201	-4.8	-4.58	-4.45	MGC27382	uncharacterized MGC27382
1567182_at	0.721	0.012203	-4.8	-4.58	-4.21	LOC105376944	uncharacterized LOC105376944
230988_at	0.721	0.01221	4.8	-4.58	4.81	ADD2	adducin 2
216673_at	0.721	0.012222	4.8	-4.58	5.2	TTTY1B///TTTY1	testis-specific transcript, Y-linked 1B (non-protein coding)///testis-specific transcript, Y-linked 1 (non-protein coding)
208273_at	0.721	0.012235	4.79	-4.58	4	ZNF670-ZNF695///ZNF670///ZNF695	ZNF670-ZNF695 readthrough (NMD candidate)///zinc finger protein 670///zinc finger protein 695
231033_at	0.721	0.012239	4.79	-4.58	5.08	DSC2	desmocollin 2
1566253_at	0.721	0.012241	-4.79	-4.58	-3.98	SH3GL1P2///SH3GL1P1	SH3 domain containing GRB2 like 1, endophilin A2 pseudogene 2///SH3 domain containing GRB2 like 1, endophilin A2 pseudogene 1
240396_at	0.721	0.012249	4.79	-4.58	4.11
1559077_at	0.721	0.01225	4.79	-4.58	4	ABI3BP	ABI family member 3 binding protein
234136_at	0.721	0.012254	-4.79	-4.58	-3.98
208372_s_at	0.721	0.012283	4.79	-4.58	4.16	LIMK1	LIM domain kinase 1
235843_at	0.721	0.012292	4.79	-4.58	4.34
221111_at	0.721	0.012316	-4.78	-4.58	-4.54	IL26	interleukin 26
216151_at	0.721	0.012319	-4.78	-4.58	-3.98
238911_at	0.721	0.01232	-4.78	-4.58	-4.12	STARD10	StAR related lipid transfer domain containing 10
1560395_at	0.721	0.012326	4.78	-4.58	4.01
1567657_at	0.721	0.012329	4.78	-4.58	4.89	OR2H1	olfactory receptor family 2 subfamily H member 1
1569892_at	0.721	0.012329	-4.78	-4.58	-4.36
234411_x_at	0.721	0.012331	4.78	-4.58	4.03	CD44	CD44 molecule (Indian blood group)
215097_at	0.721	0.012346	4.78	-4.58	4.01	CAPZB	capping actin protein of muscle Z-line beta subunit
236519_at	0.721	0.012352	4.78	-4.58	3.98	C9orf135	chromosome 9 open reading frame 135
206343_s_at	0.721	0.012359	4.78	-4.58	3.97	NRG1	neuregulin 1
206884_s_at	0.721	0.012415	4.77	-4.58	4.91	SCEL	sciellin
205421_at	0.721	0.012423	-4.77	-4.58	-6.06	SLC22A3	solute carrier family 22 member 3
1552835_at	0.721	0.012447	-4.77	-4.58	-4.23	DENND1B	DENN domain containing 1B
1556653_at	0.721	0.01245	-4.77	-4.58	-3.95	ANKAR	ankyrin and armadillo repeat containing
233352_at	0.721	0.012454	4.77	-4.58	4
232606_at	0.721	0.012456	-4.77	-4.58	-4.66	ANK2	ankyrin 2, neuronal
216658_at	0.721	0.01246	4.77	-4.58	4.09
207810_at	0.721	0.012472	4.76	-4.58	4.12	F13B	coagulation factor XIII B chain
1555099_at	0.721	0.012479	4.76	-4.58	4.25	MPP4	membrane palmitoylated protein 4
1552772_at	0.721	0.012481	4.76	-4.58	4.25	CLEC4D	C-type lectin domain family 4 member D
206196_s_at	0.721	0.012483	4.76	-4.58	4.01	RUNDC3A	RUN domain containing 3A
228362_s_at	0.721	0.01252	4.76	-4.58	3.95	FAM26F	family with sequence similarity 26 member F
238517_at	0.721	0.01252	4.76	-4.58	3.97	KLF7	Kruppel like factor 7
1556204_a_at	0.721	0.012525	4.76	-4.58	4.48	ZNF814	zinc finger protein 814
219513_s_at	0.721	0.012528	4.76	-4.58	3.95	SH2D3A	SH2 domain containing 3A
235364_at	0.721	0.012541	4.76	-4.58	3.96	TSC22D3	TSC22 domain family member 3
1570397_x_at	0.721	0.012567	-4.75	-4.58	-3.95	LOC101928910///FAM66C	uncharacterized LOC101928910///family with sequence similarity 66 member C
238269_at	0.721	0.012607	4.75	-4.58	4.07
235201_at	0.721	0.01261	-4.75	-4.58	-4.38	FOXP2	forkhead box P2
234583_at	0.721	0.012622	-4.75	-4.58	-4.11	CHL1	cell adhesion molecule L1 like
1556826_s_at	0.721	0.012659	4.74	-4.58	3.93	DRAXIN	dorsal inhibitory axon guidance protein
210304_at	0.721	0.012665	4.74	-4.58	3.93	PDE6B	phosphodiesterase 6B
230967_s_at	0.721	0.012694	-4.74	-4.58	-4	USP7	ubiquitin specific peptidase 7
1558931_at	0.721	0.012695	-4.74	-4.58	-4.18	CARMIL1	capping protein regulator and myosin 1 linker 1
215059_at	0.721	0.012711	-4.73	-4.58	-5.13
209052_s_at	0.721	0.012731	4.73	-4.58	4.2	WHSC1	Wolf-Hirschhorn syndrome candidate 1
1553493_a_at	0.721	0.012739	4.73	-4.58	4.01	TDH	L-threonine dehydrogenase (pseudogene)
235527_at	0.721	0.012742	4.73	-4.58	3.98	DLGAP1	DLG associated protein 1
215881_x_at	0.721	0.012746	4.73	-4.58	4	SSX2B///SSX3///SSX2	SSX family member 2B///SSX family member 3///SSX family member 2
241855_s_at	0.721	0.012759	-4.73	-4.58	-5
210675_s_at	0.721	0.012765	-4.73	-4.58	-3.92	PTPRR	protein tyrosine phosphatase, receptor type R
234037_s_at	0.721	0.012768	4.73	-4.58	3.96
1565065_at	0.721	0.012774	-4.73	-4.58	-3.99	OFCC1	orofacial cleft 1 candidate 1
239911_at	0.721	0.012775	4.73	-4.58	4.04	ONECUT2	one cut homeobox 2
214557_at	0.721	0.012792	4.73	-4.58	4.43	PTTG2	pituitary tumor-transforming 2
231204_at	0.721	0.012797	4.72	-4.58	3.92	ZGRF1	zinc finger GRF-type containing 1
1562436_at	0.721	0.012821	-4.72	-4.58	-4.18	CARS-AS1	CARS antisense RNA 1
1554274_a_at	0.721	0.012834	4.72	-4.58	4.98	SSH1	slingshot protein phosphatase 1
1555784_s_at	0.721	0.012862	4.72	-4.58	4.18	IRAK1	interleukin 1 receptor associated kinase 1
228004_at	0.721	0.012862	-4.72	-4.58	-4.58	LINC00261	long intergenic non-protein coding RNA 261
1559945_at	0.721	0.012876	4.72	-4.58	3.94	RUVBL2	RuvB like AAA ATPase 2
201842_s_at	0.721	0.012879	-4.71	-4.58	-4.3	EFEMP1	EGF containing fibulin like extracellular matrix protein 1
217475_s_at	0.721	0.012881	4.71	-4.58	4.02	LIMK2	LIM domain kinase 2
205568_at	0.721	0.012885	4.71	-4.58	5.6	AQP9	aquaporin 9
244225_x_at	0.721	0.012908	4.71	-4.58	3.97	LMNA	lamin A/C
1570529_at	0.721	0.012913	4.71	-4.58	4.07	PUM3	pumilio RNA binding family member 3
233076_at	0.721	0.012913	-4.71	-4.58	-5.01	JAKMIP3	Janus kinase and microtubule interacting protein 3
1566108_at	0.721	0.01292	4.71	-4.58	3.92	MYNN	myoneurin
1562740_at	0.721	0.012921	4.71	-4.58	4.68	DNAJB8-AS1	DNAJB8 antisense RNA 1
229137_at	0.721	0.012936	4.71	-4.58	3.9	FUCA1	fucosidase, alpha-L- 1, tissue
217155_at	0.721	0.012941	4.71	-4.58	4.83
227818_at	0.721	0.012941	4.71	-4.58	4.95	CEP85	centrosomal protein 85
222962_s_at	0.721	0.012942	4.71	-4.58	4.44	MCM10	minichromosome maintenance 10 replication initiation factor
215931_s_at	0.721	0.012943	4.71	-4.58	3.96	ARFGEF2	ADP ribosylation factor guanine nucleotide exchange factor 2
231361_at	0.721	0.012945	-4.71	-4.58	-4.05	NLGN1	neuroligin 1
1558920_at	0.721	0.012966	4.7	-4.58	3.9	SLC8A1-AS1	SLC8A1 antisense RNA 1
228592_at	0.721	0.012976	-4.7	-4.58	-3.94	MS4A1	membrane spanning 4-domains A1
1554311_a_at	0.721	0.01298	-4.7	-4.58	-3.98	SUPT6H	SPT6 homolog, histone chaperone
1554967_at	0.721	0.012984	4.7	-4.58	3.97	DIP2A	disco interacting protein 2 homolog A
215816_at	0.721	0.013025	4.7	-4.58	4.16	GUSBP11	glucuronidase, beta pseudogene 11
208412_s_at	0.721	0.013029	4.7	-4.58	3.93	RARB	retinoic acid receptor beta
1561200_at	0.721	0.013035	4.7	-4.58	4.09	VWA3B	von Willebrand factor A domain containing 3B
233279_at	0.721	0.013049	-4.69	-4.58	-4.2
215462_at	0.721	0.013062	4.69	-4.58	4.82	PLK3	polo like kinase 3
236667_at	0.721	0.013064	4.69	-4.58	4.16	TMEM120B	transmembrane protein 120B
1561527_at	0.721	0.013066	4.69	-4.58	4.46	LINC01514	long intergenic non-protein coding RNA 1514
215104_at	0.721	0.013071	-4.69	-4.58	-4.06	NRIP2	nuclear receptor interacting protein 2
1569739_at	0.721	0.013082	4.69	-4.58	4.05	LOC221946	uncharacterized LOC221946
1561137_s_at	0.721	0.013083	-4.69	-4.58	-3.89	GYPE	glycophorin E (MNS blood group)
236244_at	0.721	0.013097	4.69	-4.58	4.39
AFFX-r2-Bs-thr-M_s_at	0.721	0.013097	-4.69	-4.58	-3.97
232564_at	0.721	0.013119	4.69	-4.58	4.48	SLC9A5	solute carrier family 9 member A5
241246_at	0.721	0.013151	4.68	-4.58	4.06
214777_at	0.721	0.013152	-4.68	-4.58	-7.66	IGKC	immunoglobulin kappa constant
1569231_x_at	0.721	0.013156	-4.68	-4.58	-4.18
240147_at	0.721	0.013165	4.68	-4.58	3.88	C7orf50	chromosome 7 open reading frame 50
203571_s_at	0.721	0.013167	-4.68	-4.58	-4.04	ADIRF	adipogenesis regulatory factor
243533_x_at	0.721	0.013174	-4.68	-4.58	-4.45
223232_s_at	0.721	0.01318	4.68	-4.58	4.3	CGN	cingulin
223628_at	0.721	0.013185	4.68	-4.58	4.7	TMEM191A	transmembrane protein 191A (pseudogene)
228854_at	0.721	0.013192	-4.68	-4.58	-3.9
243168_at	0.721	0.013203	4.68	-4.58	4.11
209832_s_at	0.721	0.013206	4.68	-4.58	4.28	CDT1	chromatin licensing and DNA replication factor 1
1552913_at	0.721	0.013217	-4.68	-4.58	-4.91	MAGEB18	MAGE family member B18
216975_x_at	0.721	0.013234	4.67	-4.58	4.01	NPAS1	neuronal PAS domain protein 1
204916_at	0.721	0.013238	-4.67	-4.58	-4.24	RAMP1	receptor activity modifying protein 1
215879_at	0.721	0.013282	-4.67	-4.58	-3.88	ITGB1	integrin subunit beta 1
242250_at	0.721	0.013283	-4.67	-4.58	-4.49
211362_s_at	0.721	0.0133	4.67	-4.58	3.87	SERPINB13	serpin family B member 13
219389_at	0.721	0.013305	4.67	-4.58	5.44	SUSD4	sushi domain containing 4
217023_x_at	0.721	0.013322	-4.66	-4.58	-4.26	TPSB2///TPSAB1	tryptase beta 2 (gene/pseudogene)///tryptase alpha/beta 1
1564405_at	0.721	0.013339	-4.66	-4.58	-4.62
1562487_at	0.721	0.013339	4.66	-4.58	4.34	LOC101927623	uncharacterized LOC101927623
229636_at	0.721	0.013352	-4.66	-4.58	-3.87	CYB561D2	cytochrome b561 family member D2
1562991_at	0.721	0.013361	4.66	-4.58	4.04	ZNF292	zinc finger protein 292
205111_s_at	0.721	0.013375	-4.66	-4.58	-3.9	PLCE1	phospholipase C epsilon 1
204166_at	0.721	0.013376	4.66	-4.58	4.21	SBNO2	strawberry notch homolog 2
236173_s_at	0.721	0.01341	-4.65	-4.58	-3.9	LRIG1	leucine rich repeats and immunoglobulin like domains 1
230573_at	0.721	0.013413	4.65	-4.58	4.4	SGK2	SGK2, serine/threonine kinase 2
1555673_at	0.721	0.01342	4.65	-4.58	7.12	KRTAP2-3///KRTAP2-4	keratin associated protein 2-3///keratin associated protein 2-4
208539_x_at	0.721	0.013433	4.65	-4.58	5.33	SPRR2B	small proline rich protein 2B
1562582_at	0.721	0.013443	-4.65	-4.58	-3.85
238985_at	0.721	0.013453	-4.65	-4.58	-4.19	CSRNP3	cysteine and serine rich nuclear protein 3
1553574_at	0.721	0.013482	4.65	-4.58	4.37	IFNE	interferon epsilon
1556876_s_at	0.721	0.013501	-4.64	-4.58	-3.94	LOC101930578///TPTE2P2	uncharacterized LOC101930578///transmembrane phosphoinositide 3-phosphatase and tensin homolog 2 pseudogene 2
210831_s_at	0.721	0.013505	-4.64	-4.58	-3.98	PTGER3	prostaglandin E receptor 3
1564688_a_at	0.721	0.01351	4.64	-4.58	3.87	RAD9B	RAD9 checkpoint clamp component B
225345_s_at	0.721	0.013544	-4.64	-4.58	-5.47	FBXO32	F-box protein 32
215408_at	0.721	0.013556	4.64	-4.58	4.47
1570300_at	0.721	0.013575	4.64	-4.58	3.87
205728_at	0.721	0.01358	-4.63	-4.58	-3.84	TENM1	teneurin transmembrane protein 1
1569958_at	0.721	0.013598	-4.63	-4.58	-4.26	DEPDC1-AS1	DEPDC1 antisense RNA 1
237140_x_at	0.721	0.013603	-4.63	-4.58	-3.84
234855_at	0.721	0.013614	4.63	-4.58	4.27	ORF1	uncharacterized protein, clone pT-Adv JuaX22
211165_x_at	0.721	0.013622	4.63	-4.58	4	EPHB2	EPH receptor B2
207464_at	0.721	0.01363	4.63	-4.58	3.91	AHCYL1	adenosylhomocysteinase like 1
203764_at	0.721	0.013632	4.63	-4.58	4.06	DLGAP5	DLG associated protein 5
207466_at	0.721	0.013643	4.63	-4.58	3.84	GAL	galanin and GMAP prepropeptide
1560775_at	0.721	0.013645	4.63	-4.58	4.94
1558874_a_at	0.721	0.013651	4.63	-4.58	4.07
237068_at	0.721	0.013653	4.63	-4.58	4.17
244570_at	0.721	0.013664	4.63	-4.58	4	LOC101928433	uncharacterized LOC101928433
1564485_at	0.721	0.013673	4.62	-4.58	3.98	LINC00887	long intergenic non-protein coding RNA 887
1563235_at	0.721	0.013698	4.62	-4.58	3.83	LOC105372953	uncharacterized LOC105372953
1557017_at	0.721	0.013706	-4.62	-4.58	-3.83	LOC101929607	uncharacterized LOC101929607
1553304_at	0.721	0.01376	4.61	-4.58	3.96	LSM14B	LSM family member 14B
1561592_at	0.721	0.013767	-4.61	-4.58	-3.85	LOC101928823	uncharacterized LOC101928823
215805_at	0.721	0.013773	-4.61	-4.58	-4.05
1553652_a_at	0.721	0.013774	-4.61	-4.58	-3.82	C18orf54	chromosome 18 open reading frame 54
220276_at	0.721	0.013792	-4.61	-4.58	-7.45	RERGL	RERG like
206718_at	0.721	0.013819	4.61	-4.58	3.89	LMO1	LIM domain only 1
223749_at	0.721	0.01382	-4.61	-4.58	-3.84	C1QTNF2	C1q and tumor necrosis factor related protein 2
220433_at	0.721	0.013826	4.61	-4.58	3.82	PRRG3	proline rich and Gla domain 3
233356_at	0.721	0.013845	4.61	-4.58	3.9
215121_x_at	0.721	0.013846	-4.61	-4.58	-5.3	CYAT1///IGLV1-44///IGLC1	immunoglobulin lambda light chain-like///immunoglobulin lambda variable 1-44///immunoglobulin lambda constant 1
243944_at	0.721	0.013857	4.6	-4.58	4.03
1552843_at	0.721	0.013859	-4.6	-4.58	-4.21	SLC26A1	solute carrier family 26 member 1
239962_at	0.721	0.01387	-4.6	-4.58	-3.94
243159_x_at	0.721	0.013895	4.6	-4.58	5.51
205970_at	0.721	0.013905	4.6	-4.58	4.53	MT3	metallothionein 3
205765_at	0.721	0.013912	-4.6	-4.58	-3.81	CYP3A5	cytochrome P450 family 3 subfamily A member 5
231438_x_at	0.721	0.013945	4.59	-4.58	3.96	CDH8	cadherin 8
222349_x_at	0.721	0.013955	4.59	-4.58	3.88	RNF126P1	ring finger protein 126 pseudogene 1
1565756_a_at	0.721	0.013958	-4.59	-4.58	-3.81	METAP1D	methionyl aminopeptidase type 1D (mitochondrial)
207209_at	0.721	0.013961	4.59	-4.58	4.4	CETN1	centrin 1
244505_at	0.721	0.013966	-4.59	-4.58	-4.01	LOC102724537	uncharacterized LOC102724537
243499_at	0.721	0.013968	4.59	-4.58	3.84
217175_at	0.721	0.014005	-4.59	-4.58	-4.02	UGT2B15	UDP glucuronosyltransferase family 2 member B15
237161_at	0.721	0.014006	-4.59	-4.58	-4.55
1569536_at	0.721	0.014007	4.59	-4.58	3.83	FLVCR2	feline leukemia virus subgroup C cellular receptor family member 2
231264_at	0.721	0.014009	4.59	-4.58	3.93	TMCO2	transmembrane and coiled-coil domains 2
1553698_a_at	0.721	0.014021	4.59	-4.58	4.01	CCSAP	centriole, cilia and spindle associated protein
1564962_at	0.721	0.014036	-4.58	-4.58	-4.03	ZNF92	zinc finger protein 92
211694_at	0.721	0.014037	-4.58	-4.58	-4.73	TSSK1B	testis specific serine kinase 1B
1320_at	0.721	0.014045	4.58	-4.58	3.8	PTPN21	protein tyrosine phosphatase, non-receptor type 21
237297_at	0.721	0.014055	4.58	-4.58	4.98
207204_at	0.721	0.014063	4.58	-4.58	3.98	FSCN2	fascin actin-bundling protein 2, retinal
243928_s_at	0.721	0.014069	4.58	-4.58	3.81	ABCC4	ATP binding cassette subfamily C member 4
1562326_at	0.721	0.014082	-4.58	-4.58	-4.35	LINC01122	long intergenic non-protein coding RNA 1122
238442_at	0.721	0.014103	4.58	-4.58	3.95	HEXIM1	hexamethylene bisacetamide inducible 1
230013_s_at	0.721	0.01411	-4.58	-4.58	-3.81	ARHGAP23	Rho GTPase activating protein 23
225869_s_at	0.721	0.014124	4.58	-4.58	4.18	UNC93B1	unc-93 homolog B1 (C. elegans)
203662_s_at	0.721	0.014132	-4.57	-4.58	-3.85	TMOD1	tropomodulin 1
231788_at	0.721	0.014136	4.57	-4.58	3.81	LPAR5	lysophosphatidic acid receptor 5
206762_at	0.721	0.014143	-4.57	-4.58	-4.17	KCNA5	potassium voltage-gated channel subfamily A member 5
213638_at	0.721	0.014156	4.57	-4.58	6.87	PHACTR1	phosphatase and actin regulator 1
1555205_at	0.721	0.014169	4.57	-4.58	4.19
1570009_at	0.721	0.01417	-4.57	-4.58	-4.59	LOC643711	platelet activating factor acetylhydrolase 1b catalytic subunit 2 pseudogene
216373_at	0.721	0.014214	-4.57	-4.58	-5.39	TAPT1	transmembrane anterior posterior transformation 1
207210_at	0.721	0.014221	-4.57	-4.58	-3.9	GABRA3	gamma-aminobutyric acid type A receptor alpha3 subunit
1567878_at	0.721	0.014226	-4.56	-4.58	-4.44	DEFB114	defensin beta 114
242116_x_at	0.721	0.014231	4.56	-4.58	4.05
231544_s_at	0.721	0.014237	-4.56	-4.58	-4.14	POLR3G	RNA polymerase III subunit G
244129_at	0.721	0.01426	4.56	-4.58	3.84
221054_s_at	0.721	0.014265	-4.56	-4.58	-4.33	TCL6	T-cell leukemia/lymphoma 6 (non-protein coding)
230778_at	0.721	0.014269	4.56	-4.58	3.78
236376_at	0.721	0.01429	4.56	-4.58	4.17	RIMKLA	ribosomal modification protein rimK like family member A
228409_at	0.721	0.014296	-4.56	-4.58	-3.85	PLIN4	perilipin 4
211455_at	0.721	0.0143	-4.56	-4.58	-3.81
220025_at	0.721	0.014315	4.56	-4.58	4.25	TBR1	T-box, brain 1
1568190_at	0.721	0.014321	-4.56	-4.58	-3.84
222089_s_at	0.721	0.014324	-4.55	-4.58	-3.84	C16orf71	chromosome 16 open reading frame 71
239522_at	0.721	0.014332	4.55	-4.58	4.04	IL12RB1	interleukin 12 receptor subunit beta 1
233629_at	0.721	0.014349	-4.55	-4.58	-4.18
230188_at	0.721	0.01435	4.55	-4.58	4.08	NIPAL4	NIPA like domain containing 4
217670_at	0.721	0.014353	4.55	-4.58	4.24	RPLP2	ribosomal protein lateral stalk subunit P2
1558905_at	0.721	0.014354	4.55	-4.58	3.82
1557078_at	0.721	0.014386	4.55	-4.58	3.79	SLFN5	schlafen family member 5
210008_s_at	0.721	0.014429	4.54	-4.58	4.4	MRPS12	mitochondrial ribosomal protein S12
1563299_at	0.721	0.014439	-4.54	-4.58	-4.84
234534_at	0.721	0.014443	4.54	-4.58	4.01
238460_at	0.721	0.014455	4.54	-4.58	3.8	FAM83A	family with sequence similarity 83 member A
214142_at	0.721	0.014481	4.54	-4.58	3.78	ZG16	zymogen granule protein 16
206973_at	0.721	0.014482	-4.54	-4.58	-3.97	PPFIA2	PTPRF interacting protein alpha 2
1561042_at	0.721	0.014487	4.54	-4.58	4.11	CASC7///AGO2	cancer susceptibility candidate 7 (non-protein coding)///argonaute 2, RISC catalytic component
233839_at	0.721	0.01452	-4.53	-4.58	-5.12	EFCAB6	EF-hand calcium binding domain 6
1565927_s_at	0.721	0.01452	-4.53	-4.58	-4
215638_at	0.721	0.014524	4.53	-4.58	4.32	ERBB3	erb-b2 receptor tyrosine kinase 3
207646_s_at	0.721	0.014524	4.53	-4.58	4.06	CDY1B///CDY2B///CDY2A///CDY1	chromodomain Y-linked 1B///chromodomain Y-linked 2B///chromodomain Y-linked 2A///chromodomain Y-linked 1
232332_at	0.721	0.014527	-4.53	-4.58	-3.78	KIAA1210	KIAA1210
1560735_s_at	0.721	0.014528	-4.53	-4.58	-3.95	LOC102723532///LOC101927079///LOC727924///OR4N4	olfactory receptor 4N4///uncharacterized LOC101927079///uncharacterized LOC727924///olfactory receptor family 4 subfamily N member 4
206459_s_at	0.721	0.014532	4.53	-4.58	3.85	WNT2B	Wnt family member 2B
214584_x_at	0.721	0.014536	-4.53	-4.58	-3.77	ACACB	acetyl-CoA carboxylase beta
1552788_a_at	0.721	0.014544	4.53	-4.58	4.3	HELB	DNA helicase B
212805_at	0.721	0.014545	-4.53	-4.58	-3.79	PRUNE2	prune homolog 2
203691_at	0.721	0.014562	4.53	-4.58	4.07	PI3	peptidase inhibitor 3
1559045_at	0.721	0.014564	-4.53	-4.58	-3.95	LOC100128288	uncharacterized LOC100128288
1552943_at	0.721	0.014583	-4.53	-4.58	-4.57	GABRG1	gamma-aminobutyric acid type A receptor gamma1 subunit
236853_at	0.721	0.014585	4.53	-4.58	3.76	TEX29	testis expressed 29
1561599_at	0.721	0.014586	4.53	-4.58	3.85
227762_at	0.721	0.014595	-4.53	-4.58	-3.75
1570084_at	0.721	0.014598	-4.53	-4.58	-3.87
1562715_at	0.721	0.014602	4.53	-4.58	4.48
238938_at	0.721	0.014604	-4.53	-4.58	-4.09
1559072_a_at	0.721	0.014612	4.53	-4.58	4.46	ELFN2	extracellular leucine rich repeat and fibronectin type III domain containing 2
243163_at	0.721	0.01462	-4.52	-4.58	-4.3	HECW1	HECT, C2 and WW domain containing E3 ubiquitin protein ligase 1
205268_s_at	0.721	0.014623	4.52	-4.58	4.16	ADD2	adducin 2
237192_at	0.721	0.014644	-4.52	-4.58	-5.71	LOC101927668	uncharacterized LOC101927668
205826_at	0.721	0.014648	-4.52	-4.58	-4.01	MYOM2	myomesin 2
1555163_at	0.721	0.014661	4.52	-4.58	4.27
231348_s_at	0.721	0.014663	-4.52	-4.58	-3.84	LMO3	LIM domain only 3
206402_s_at	0.721	0.014666	-4.52	-4.58	-3.75	NPFF	neuropeptide FF-amide peptide precursor
1569600_at	0.721	0.014666	4.52	-4.58	3.96	DLEU2	deleted in lymphocytic leukemia 2 (non-protein coding)
1569696_at	0.721	0.014687	4.52	-4.58	3.87	CSMD2-AS1	CSMD2 antisense RNA 1
238239_at	0.721	0.01469	4.52	-4.58	4.02	WDR27	WD repeat domain 27
232430_at	0.721	0.014703	4.52	-4.58	3.74	LOC148696	uncharacterized LOC148696
211548_s_at	0.721	0.014708	-4.52	-4.58	-4.59	HPGD	hydroxyprostaglandin dehydrogenase 15-(NAD)
232817_at	0.721	0.014741	-4.51	-4.58	-3.88
1556609_at	0.721	0.014756	-4.51	-4.58	-3.78	LOC401098	uncharacterized LOC401098
1556617_a_at	0.721	0.014767	-4.51	-4.58	-4.2	LINC00901	long intergenic non-protein coding RNA 901
243028_x_at	0.721	0.014768	-4.51	-4.58	-5.28
203862_s_at	0.721	0.014769	4.51	-4.58	3.77	ACTN2	actinin alpha 2
1565495_at	0.721	0.014778	4.51	-4.58	3.97	CYAT1///IGLV1-44///IGLC1	immunoglobulin lambda light chain-like///immunoglobulin lambda variable 1-44///immunoglobulin lambda constant 1
206070_s_at	0.721	0.014787	-4.51	-4.58	-3.76	EPHA3	EPH receptor A3
241820_at	0.721	0.01482	4.5	-4.58	4.65	RIF1	replication timing regulatory factor 1
240754_at	0.721	0.014836	4.5	-4.58	3.74	LOC284933	uncharacterized LOC284933
1558451_at	0.721	0.01485	-4.5	-4.58	-3.76	LOC285500	uncharacterized LOC285500
243334_at	0.721	0.014856	-4.5	-4.58	-3.8	CACNA1D	calcium voltage-gated channel subunit alpha1 D
1561034_at	0.721	0.014857	4.5	-4.58	4.48
233244_at	0.721	0.014874	-4.5	-4.58	-4.03
219140_s_at	0.721	0.014887	4.5	-4.58	3.73	RBP4	retinol binding protein 4
227149_at	0.721	0.014888	4.5	-4.58	3.79	TNRC6C	trinucleotide repeat containing 6C
1562079_at	0.721	0.014897	-4.5	-4.58	-3.73
1553412_at	0.721	0.014913	4.5	-4.58	3.94	AGBL4	ATP/GTP binding protein like 4
1565650_at	0.721	0.014938	-4.49	-4.58	-3.73
222645_s_at	0.721	0.014946	4.49	-4.58	3.8	KCTD5	potassium channel tetramerization domain containing 5
244057_s_at	0.721	0.014948	-4.49	-4.58	-3.85	VSTM4	V-set and transmembrane domain containing 4
240917_at	0.721	0.014956	4.49	-4.58	4.05	LOC101927640	uncharacterized LOC101927640
225453_x_at	0.721	0.014956	4.49	-4.58	3.79	CCDC124	coiled-coil domain containing 124
244632_at	0.721	0.014992	4.49	-4.58	4.07	CNTN5	contactin 5
232478_at	0.721	0.014999	-4.49	-4.58	-4.46	MIR181A2HG	MIR181A2 host gene
232893_at	0.721	0.015008	4.49	-4.58	3.75	LMBRD2	LMBR1 domain containing 2
221443_x_at	0.721	0.015018	4.48	-4.58	3.72	PRLH	prolactin releasing hormone
234749_s_at	0.721	0.015034	4.48	-4.58	3.76	POC1A	POC1 centriolar protein A
242753_x_at	0.721	0.015047	4.48	-4.58	4.26	AP1AR	adaptor related protein complex 1 associated regulatory protein
228417_at	0.721	0.015062	-4.48	-4.58	-3.84	ISYNA1	inositol-3-phosphate synthase 1
223549_s_at	0.721	0.01508	4.48	-4.58	3.94	ESPN	espin
206627_s_at	0.721	0.015084	-4.48	-4.58	-3.73	SSX1	SSX family member 1
233061_at	0.721	0.01511	4.48	-4.58	3.93	FITM2	fat storage inducing transmembrane protein 2
1555716_a_at	0.721	0.01513	4.47	-4.58	3.87	CXADR	coxsackie virus and adenovirus receptor
240028_at	0.721	0.015134	-4.47	-4.58	-3.74	FSIP2	fibrous sheath interacting protein 2
225575_at	0.721	0.015136	-4.47	-4.58	-4.45	LIFR	leukemia inhibitory factor receptor alpha
204904_at	0.721	0.01514	-4.47	-4.58	-4.81	GJA4	gap junction protein alpha 4
232989_s_at	0.721	0.015145	4.47	-4.58	4.09	CCDC136	coiled-coil domain containing 136
1566884_at	0.721	0.015146	4.47	-4.58	3.74
232258_at	0.721	0.015149	-4.47	-4.58	-3.75	TCTE3	t-complex-associated-testis-expressed 3
216712_at	0.721	0.01515	-4.47	-4.58	-3.72	SLC25A30	solute carrier family 25 member 30
220970_s_at	0.721	0.015154	-4.47	-4.58	-3.84	KRTAP2-3///KRTAP2-4	keratin associated protein 2-3///keratin associated protein 2-4
215953_at	0.721	0.015157	-4.47	-4.58	-3.78	SMG7-AS1	SMG7 antisense RNA 1
87100_at	0.721	0.015158	4.47	-4.58	3.76	ABHD2	abhydrolase domain containing 2
244030_at	0.721	0.015164	4.47	-4.58	3.71	STYX	serine/threonine/tyrosine interacting protein
1554977_at	0.721	0.015179	4.47	-4.58	3.7	LKAAEAR1	LKAAEAR motif containing 1
237206_at	0.721	0.015183	-4.47	-4.58	-3.94	MYOCD	myocardin
207575_at	0.721	0.015198	4.47	-4.58	3.8	GOLGA6A	golgin A6 family member A
207345_at	0.721	0.015201	4.47	-4.58	4.02	FST	follistatin
241505_at	0.721	0.015202	-4.47	-4.58	-4.78
1555830_s_at	0.721	0.015213	4.47	-4.58	3.79	ESYT2	extended synaptotagmin 2
206525_at	0.721	0.015231	-4.46	-4.58	-3.83	GABRR1	gamma-aminobutyric acid type A receptor rho1 subunit
1557036_at	0.721	0.015244	4.46	-4.58	4.04	ZBTB1	zinc finger and BTB domain containing 1
215176_x_at	0.721	0.015251	-4.46	-4.58	-4.85	IGK///IGKC	immunoglobulin kappa locus///immunoglobulin kappa constant
1557008_at	0.721	0.015255	4.46	-4.58	3.72	LOC340107	uncharacterized LOC340107
237876_at	0.721	0.015255	-4.46	-4.58	-3.91
1561090_at	0.721	0.015282	4.46	-4.58	4.12	LINC01538	long intergenic non-protein coding RNA 1538
237727_at	0.721	0.015284	-4.46	-4.58	-4.18
233202_at	0.721	0.015292	4.46	-4.58	3.75	CNTNAP3	contactin associated protein-like 3
232305_at	0.721	0.015296	-4.46	-4.58	-4.19	HMGCLL1	3-hydroxymethyl-3-methylglutaryl-CoA lyase like 1
1566210_at	0.721	0.015299	-4.46	-4.58	-3.72
238891_at	0.721	0.015306	-4.46	-4.58	-3.91
1570289_at	0.721	0.015311	4.46	-4.58	3.7	LOC646736	uncharacterized LOC646736
1555826_at	0.721	0.015313	4.46	-4.58	3.69	BIRC5	baculoviral IAP repeat containing 5
1552671_a_at	0.721	0.015313	4.46	-4.58	4.12	SLC9A7	solute carrier family 9 member A7
1553405_a_at	0.721	0.015323	4.46	-4.58	4.67	CSMD1	CUB and Sushi multiple domains 1
1557780_at	0.721	0.015329	4.45	-4.58	4.53
230066_at	0.721	0.015354	4.45	-4.58	3.7	SNX25	sorting nexin 25
1566644_at	0.721	0.015358	4.45	-4.58	4.24
210850_s_at	0.721	0.015371	-4.45	-4.58	-3.72	ELK1	ELK1, ETS transcription factor
1556592_at	0.721	0.015381	-4.45	-4.58	-4.01
223820_at	0.721	0.015384	-4.45	-4.58	-4.12	RBP5	retinol binding protein 5
217641_at	0.721	0.015391	-4.45	-4.58	-3.93	GPR135	G protein-coupled receptor 135
240287_at	0.721	0.015392	4.45	-4.58	3.69	ACOD1	aconitate decarboxylase 1
213536_s_at	0.721	0.015399	4.45	-4.58	3.7
236177_s_at	0.721	0.015409	4.45	-4.58	3.73
1553237_x_at	0.721	0.015421	4.45	-4.58	3.7	PCDHAC1	protocadherin alpha subfamily C, 1
241271_at	0.721	0.015432	-4.45	-4.58	-5.17
1558075_at	0.721	0.015434	-4.44	-4.58	-5.04
205015_s_at	0.721	0.015464	4.44	-4.58	3.73	TGFA	transforming growth factor alpha
234992_x_at	0.721	0.015481	4.44	-4.58	3.84	ECT2	epithelial cell transforming 2
241011_at	0.721	0.015483	4.44	-4.58	3.92
1568779_a_at	0.721	0.015497	-4.44	-4.58	-5.43	ECM2	extracellular matrix protein 2
220415_at	0.721	0.01551	-4.44	-4.58	-3.74	FPGT-TNNI3K///TNNI3K	FPGT-TNNI3K readthrough///TNNI3 interacting kinase
233478_at	0.721	0.01554	4.43	-4.58	4.41
211650_x_at	0.721	0.015557	-4.43	-4.58	-3.75	IGHV3-23///IGHV4-31///IGHM///IGHG3///IGHG1///IGHD///IGHA1///IGH	immunoglobulin heavy variable 3-23///immunoglobulin heavy variable 4-31///immunoglobulin heavy constant mu///immunoglobulin heavy constant gamma 3 (G3m marker)///immunoglobulin heavy constant gamma 1 (G1m marker)///immunoglobulin heavy constant delta///immunoglobulin heavy constant alpha 1///immunoglobulin heavy locus
243253_at	0.721	0.0156	4.43	-4.58	3.88
1554875_at	0.721	0.015607	-4.43	-4.58	-3.71	CAMKMT	calmodulin-lysine N-methyltransferase
236726_at	0.721	0.015615	-4.43	-4.58	-3.9	RGS6	regulator of G-protein signaling 6
215760_s_at	0.721	0.015633	4.43	-4.58	3.67	SBNO2	strawberry notch homolog 2
1556648_a_at	0.721	0.01564	-4.43	-4.58	-3.67	LINC01553	long intergenic non-protein coding RNA 1553
224020_at	0.721	0.015654	4.42	-4.58	3.68	LINC00626	long intergenic non-protein coding RNA 626
242339_at	0.721	0.015656	4.42	-4.58	3.67
211273_s_at	0.721	0.015659	-4.42	-4.58	-3.67	TBX1	T-box 1
234884_x_at	0.721	0.015674	-4.42	-4.58	-3.68	CKAP2///IGLV@///IGLC1	cytoskeleton associated protein 2///immunoglobulin lambda variable cluster///immunoglobulin lambda constant 1
1555908_at	0.721	0.015674	4.42	-4.58	3.87	FAM120A	family with sequence similarity 120A
230469_at	0.721	0.015675	4.42	-4.58	4.85	RTKN2	rhotekin 2
234091_at	0.721	0.015701	4.42	-4.58	3.68
1569297_at	0.721	0.015723	-4.42	-4.58	-3.7	LINC01300	long intergenic non-protein coding RNA 1300
239860_at	0.721	0.015733	4.42	-4.58	4.25	LOC100130232	LP2209
1569064_at	0.721	0.015763	4.41	-4.58	3.86	C15orf62	chromosome 15 open reading frame 62
215337_at	0.721	0.015768	4.41	-4.58	3.88	MED24	mediator complex subunit 24
1554579_a_at	0.721	0.015784	4.41	-4.58	4.33	MYO18B	myosin XVIIIB
1564066_at	0.721	0.015798	4.41	-4.58	3.74	TMEM151B	transmembrane protein 151B
203717_at	0.721	0.01582	4.41	-4.58	3.91	DPP4	dipeptidyl peptidase 4
235765_at	0.721	0.015828	-4.41	-4.58	-4.12	TLE4	transducin like enhancer of split 4
242474_s_at	0.721	0.015855	4.41	-4.58	3.68	VMA21	VMA21 vacuolar H+-ATPase homolog (S. cerevisiae)
1563033_x_at	0.721	0.015861	-4.41	-4.58	-4.88
1566204_at	0.721	0.015863	-4.4	-4.58	-3.96
240348_at	0.721	0.015869	4.4	-4.58	5.45	SLC6A11	solute carrier family 6 member 11
203296_s_at	0.721	0.01589	-4.4	-4.58	-6.28	ATP1A2	ATPase Na+/K+ transporting subunit alpha 2
238626_at	0.721	0.015914	4.4	-4.58	4.21	ANKS6	ankyrin repeat and sterile alpha motif domain containing 6
228546_at	0.721	0.015915	-4.4	-4.58	-6.16	DPP6	dipeptidyl peptidase like 6
202888_s_at	0.721	0.015951	4.4	-4.58	5.51	ANPEP	alanyl aminopeptidase, membrane
233653_at	0.721	0.015952	-4.4	-4.58	-3.72
232177_at	0.721	0.015978	4.39	-4.58	3.65
224396_s_at	0.721	0.015984	-4.39	-4.58	-5.49	ASPN	asporin
230021_at	0.721	0.015994	4.39	-4.58	3.65	TICRR	TOPBP1 interacting checkpoint and replication regulator
239854_at	0.721	0.015994	4.39	-4.58	4.33	SYCE3	synaptonemal complex central element protein 3
244328_x_at	0.721	0.015999	4.39	-4.58	3.67
239795_at	0.721	0.016003	4.39	-4.58	3.97
229839_at	0.721	0.016049	-4.39	-4.58	-4.3	SCARA5	scavenger receptor class A member 5
236290_at	0.721	0.016057	-4.39	-4.58	-4.3	DOK6	docking protein 6
1555359_at	0.721	0.016106	4.38	-4.58	3.69	PIGQ	phosphatidylinositol glycan anchor biosynthesis class Q
AFFX-r2-Bs-dap-M_at	0.721	0.016126	-4.38	-4.58	-3.86
222297_x_at	0.721	0.016146	4.38	-4.58	3.81	RPL18	ribosomal protein L18
242679_at	0.721	0.016166	-4.38	-4.58	-3.82	TTN-AS1	TTN antisense RNA 1
1559521_at	0.721	0.016168	-4.38	-4.58	-3.63
231505_s_at	0.721	0.016181	4.38	-4.58	3.63	SFXN4	sideroflexin 4
1565694_at	0.721	0.016183	4.38	-4.58	3.84	DTYMK	deoxythymidylate kinase
1552552_s_at	0.721	0.0162	-4.37	-4.58	-5.06	CLEC4C	C-type lectin domain family 4 member C
1569300_at	0.721	0.016203	4.37	-4.58	3.74	MFAP3L	microfibrillar associated protein 3 like
1568795_at	0.721	0.016207	-4.37	-4.58	-3.91	LOC105373495	uncharacterized LOC105373495
240272_at	0.721	0.016209	4.37	-4.58	3.67
1569900_at	0.721	0.016221	-4.37	-4.58	-3.87	LOC101927533///LOC440867	uncharacterized LOC101927533///uncharacterized LOC440867
210481_s_at	0.721	0.016245	-4.37	-4.58	-5.03	CLEC4M	C-type lectin domain family 4 member M
236706_at	0.721	0.016253	4.37	-4.58	3.62	LYG1	lysozyme g1
238257_at	0.721	0.016256	-4.37	-4.58	-5.09
1561467_at	0.721	0.016261	4.37	-4.58	4.4
219320_at	0.721	0.016263	4.37	-4.58	3.81	MYO19	myosin XIX
217272_s_at	0.721	0.016275	4.37	-4.58	4.56	SERPINB13	serpin family B member 13
206187_at	0.721	0.016275	4.37	-4.58	3.86	PTGIR	prostaglandin I2 (prostacyclin) receptor (IP)
208605_s_at	0.721	0.016292	-4.37	-4.58	-3.72	NTRK1	neurotrophic receptor tyrosine kinase 1
1557628_s_at	0.721	0.016392	-4.36	-4.58	-3.62	LOC283745	uncharacterized LOC283745
204580_at	0.721	0.016396	4.36	-4.58	3.63	MMP12	matrix metallopeptidase 12
1556971_a_at	0.721	0.016413	-4.36	-4.58	-4.2
207578_s_at	0.721	0.016444	4.35	-4.58	3.63	HTR4	5-hydroxytryptamine receptor 4
237412_at	0.721	0.01645	4.35	-4.58	3.66
215915_at	0.721	0.016453	-4.35	-4.58	-3.63	GULP1	GULP, engulfment adaptor PTB domain containing 1
41469_at	0.721	0.016454	4.35	-4.58	3.99	PI3	peptidase inhibitor 3
239697_x_at	0.721	0.01646	4.35	-4.58	3.86	C3orf67	chromosome 3 open reading frame 67
241850_at	0.721	0.016491	4.35	-4.58	3.62
226918_at	0.721	0.016491	-4.35	-4.58	-3.69	JPH4///AP1G2	junctophilin 4///adaptor related protein complex 1 gamma 2 subunit
232635_at	0.721	0.016512	-4.35	-4.58	-3.87	CEP128	centrosomal protein 128
210353_s_at	0.721	0.016513	-4.35	-4.58	-3.62	SLC6A2	solute carrier family 6 member 2
1563341_at	0.721	0.016545	-4.34	-4.58	-3.6	LOC101927783	uncharacterized LOC101927783
232325_at	0.721	0.016549	-4.34	-4.58	-4.04
231773_at	0.721	0.016551	-4.34	-4.58	-3.89	ANGPTL1	angiopoietin like 1
1564707_x_at	0.721	0.016555	-4.34	-4.58	-3.77	GLS2	glutaminase 2
237506_at	0.721	0.016562	4.34	-4.58	3.78	TMEM177	transmembrane protein 177
1561055_at	0.721	0.01657	-4.34	-4.58	-3.93	LOC100507534	uncharacterized LOC100507534
201291_s_at	0.721	0.01659	4.34	-4.58	3.6	TOP2A	topoisomerase (DNA) II alpha
234523_at	0.721	0.0166	-4.34	-4.58	-3.63
243877_at	0.721	0.016602	4.34	-4.58	3.93
227403_at	0.721	0.016619	4.34	-4.58	3.73	PIGX	phosphatidylinositol glycan anchor biosynthesis class X
234633_at	0.721	0.01662	-4.34	-4.58	-3.92	KRTAP4-11	keratin associated protein 4-11
208280_at	0.721	0.016623	-4.34	-4.58	-3.67	CDRT1	CMT1A duplicated region transcript 1
201150_s_at	0.721	0.016633	-4.34	-4.58	-3.99	TIMP3	TIMP metallopeptidase inhibitor 3
1552758_at	0.721	0.016637	4.34	-4.58	3.6	HDAC9	histone deacetylase 9
233521_at	0.721	0.016682	-4.33	-4.58	-3.7
209220_at	0.721	0.016682	-4.33	-4.58	-3.66	GPC3	glypican 3
234631_at	0.721	0.01669	4.33	-4.58	3.6	KRTAP4-8	keratin associated protein 4-8
233046_at	0.721	0.016704	-4.33	-4.58	-4.68
231127_at	0.721	0.01671	-4.33	-4.58	-3.59
1569259_at	0.721	0.016726	-4.33	-4.58	-3.64	DAB1-AS1	DAB1 antisense RNA 1
238575_at	0.721	0.016731	-4.33	-4.58	-4.3	OSBPL6	oxysterol binding protein like 6
224111_x_at	0.721	0.01675	4.33	-4.58	3.61	KLF16	Kruppel like factor 16
244422_at	0.721	0.016754	-4.33	-4.58	-4.04	LOC101928370	uncharacterized LOC101928370
224200_s_at	0.721	0.016776	4.32	-4.58	3.59	RAD18	RAD18, E3 ubiquitin protein ligase
1562491_at	0.721	0.016792	-4.32	-4.58	-4.25	LOC101928622	uncharacterized LOC101928622
1555568_at	0.721	0.016825	4.32	-4.58	3.93	GUSBP2	glucuronidase, beta pseudogene 2
206907_at	0.721	0.016843	4.32	-4.58	5.63	TNFSF9	tumor necrosis factor superfamily member 9
202859_x_at	0.721	0.016853	4.32	-4.58	3.58	CXCL8	C-X-C motif chemokine ligand 8
207354_at	0.721	0.016857	-4.32	-4.58	-3.78	CCL16	C-C motif chemokine ligand 16
202601_s_at	0.721	0.016861	4.32	-4.58	4.18	HTATSF1	HIV-1 Tat specific factor 1
1562408_at	0.721	0.016882	4.32	-4.58	3.61	LOC101926984	leucine-rich repeat-containing protein 37A3
214068_at	0.721	0.016905	4.31	-4.58	3.58	BEAN1	brain expressed, associated with NEDD4, 1
242411_at	0.721	0.01692	4.31	-4.58	3.81	ARL10	ADP ribosylation factor like GTPase 10
224096_at	0.721	0.01692	4.31	-4.58	3.58	MIR4755	microRNA 4755
1569911_at	0.721	0.01693	4.31	-4.58	3.87	LINC00824	long intergenic non-protein coding RNA 824
216519_s_at	0.721	0.016932	4.31	-4.58	3.94	PROSC	proline synthetase cotranscribed homolog (bacterial)
1567028_s_at	0.721	0.016943	4.31	-4.58	3.7	SH3GL1P2	SH3 domain containing GRB2 like 1, endophilin A2 pseudogene 2
242519_at	0.721	0.016963	-4.31	-4.58	-3.93	CCDC152	coiled-coil domain containing 152
208428_at	0.721	0.016967	-4.31	-4.58	-4.37	TAP2	transporter 2, ATP binding cassette subfamily B member
1552288_at	0.721	0.016981	4.31	-4.58	3.58	CILP2	cartilage intermediate layer protein 2
202855_s_at	0.721	0.01702	4.3	-4.58	4.52	MIR6787///SLC16A3	microRNA 6787///solute carrier family 16 member 3
220504_at	0.721	0.017021	-4.3	-4.58	-5.04	KERA	keratocan
1561480_a_at	0.721	0.017032	-4.3	-4.58	-3.81
231688_at	0.721	0.017039	4.3	-4.58	7.09	MMP8	matrix metallopeptidase 8
230702_at	0.721	0.017058	-4.3	-4.58	-3.7
1563584_at	0.721	0.01707	4.3	-4.58	3.82	PIEZO2	piezo type mechanosensitive ion channel component 2
AFFX-r2-Bs-phe-5_at	0.721	0.017077	4.3	-4.58	4.06
206665_s_at	0.721	0.017095	4.3	-4.58	3.59	BCL2L1	BCL2 like 1
206720_at	0.721	0.017099	4.3	-4.58	3.59	MGAT5	mannosyl (alpha-1,6-)-glycoprotein beta-1,6-N-acetyl-glucosaminyltransferase
1561045_a_at	0.721	0.017103	-4.3	-4.58	-3.56	LOC101928973	uncharacterized LOC101928973
241115_at	0.721	0.017104	4.3	-4.58	3.62
1561192_at	0.721	0.01712	-4.3	-4.58	-3.57
1569582_at	0.721	0.017125	-4.3	-4.58	-4.13	AADACP1	arylacetamide deacetylase pseudogene 1
244613_at	0.721	0.017135	-4.29	-4.58	-4.2
229883_at	0.721	0.017142	4.29	-4.58	3.59	GRIN2D	glutamate ionotropic receptor NMDA type subunit 2D
240881_at	0.721	0.017154	4.29	-4.58	4.18
1559621_at	0.721	0.017156	-4.29	-4.58	-3.65	LOC101927237	uncharacterized LOC101927237
235835_at	0.721	0.017157	-4.29	-4.58	-3.65
231501_at	0.721	0.017198	-4.29	-4.58	-3.57	LOC105375773	uncharacterized LOC105375773
1568558_x_at	0.721	0.017201	4.29	-4.58	4.38
240835_at	0.721	0.01721	4.29	-4.58	3.66
236627_at	0.721	0.017211	-4.29	-4.58	-3.84	LOC101927085	uncharacterized LOC101927085
206349_at	0.721	0.017226	-4.29	-4.58	-3.56	LGI1	leucine rich glioma inactivated 1
233094_at	0.721	0.017227	4.29	-4.58	3.55
1570395_a_at	0.721	0.017244	-4.29	-4.58	-4.45	LOC101928910///FAM66C	uncharacterized LOC101928910///family with sequence similarity 66 member C
237742_at	0.721	0.01725	4.28	-4.58	4.29
243503_at	0.721	0.017261	-4.28	-4.58	-3.91
243832_at	0.721	0.017261	4.28	-4.58	3.61
243110_x_at	0.721	0.017267	4.28	-4.58	3.55	NPW	neuropeptide W
205675_at	0.721	0.017305	4.28	-4.58	3.55	MTTP	microsomal triglyceride transfer protein
1555375_at	0.721	0.017305	4.28	-4.58	3.96	GRIK2	glutamate ionotropic receptor kainate type subunit 2
1564308_a_at	0.721	0.017314	4.28	-4.58	4.73	MPP7	membrane palmitoylated protein 7
206534_at	0.721	0.017317	-4.28	-4.58	-4.12	GRIN2A	glutamate ionotropic receptor NMDA type subunit 2A
209968_s_at	0.721	0.017345	-4.28	-4.58	-3.69	NCAM1	neural cell adhesion molecule 1
242764_at	0.721	0.01735	-4.28	-4.58	-3.77	DCHS2	dachsous cadherin-related 2
1554942_a_at	0.721	0.017366	4.28	-4.58	3.82	KLHL14	kelch like family member 14
1564317_at	0.721	0.017376	4.27	-4.58	4.25
1564371_a_at	0.721	0.017381	4.27	-4.58	3.84	CASC2	cancer susceptibility candidate 2 (non-protein coding)
1554508_at	0.721	0.017422	4.27	-4.58	4.69	PIK3AP1	phosphoinositide-3-kinase adaptor protein 1
213745_at	0.721	0.017435	-4.27	-4.58	-6.79	ATRNL1	attractin like 1
207087_x_at	0.721	0.01749	4.27	-4.58	3.82	ANK1	ankyrin 1
233969_at	0.721	0.017502	-4.26	-4.58	-3.77	IGLC1	immunoglobulin lambda constant 1
207419_s_at	0.721	0.017503	4.26	-4.58	5.45	RAC2	ras-related C3 botulinum toxin substrate 2 (rho family, small GTP binding protein Rac2)
223687_s_at	0.721	0.017506	4.26	-4.58	3.94	LY6K	lymphocyte antigen 6 complex, locus K
228918_at	0.721	0.017515	4.26	-4.58	3.57	SLC43A2	solute carrier family 43 member 2
237400_at	0.721	0.017517	-4.26	-4.58	-3.54	ATP5S	ATP synthase, H+ transporting, mitochondrial Fo complex subunit s (factor B)
227390_at	0.721	0.017537	-4.26	-4.58	-3.86	MEG3	maternally expressed 3 (non-protein coding)
1552991_at	0.721	0.017538	4.26	-4.58	4.04	OR5P2	olfactory receptor family 5 subfamily P member 2
241337_at	0.721	0.017553	-4.26	-4.58	-4.4	LOC101929465	uncharacterized LOC101929465
236003_x_at	0.721	0.017563	4.26	-4.58	3.84
232368_at	0.721	0.017565	4.26	-4.58	3.76	TRAPPC3L	trafficking protein particle complex 3 like
1557724_a_at	0.721	0.017576	4.26	-4.58	3.63	LOC285847	uncharacterized LOC285847
215859_at	0.721	0.017596	4.26	-4.58	3.83	NCLN	nicalin
213946_s_at	0.721	0.017597	-4.26	-4.58	-3.65	OBSL1	obscurin like 1
215675_at	0.721	0.017658	-4.25	-4.58	-3.52	TEF	TEF, PAR bZIP transcription factor
240092_at	0.721	0.01767	4.25	-4.58	3.53
205440_s_at	0.721	0.01768	-4.25	-4.58	-4.7	NPY1R	neuropeptide Y receptor Y1
244210_at	0.721	0.017688	4.25	-4.58	4.23
240476_at	0.721	0.017695	-4.25	-4.58	-3.54
233837_at	0.721	0.017704	4.25	-4.58	4.35	GGT1	gamma-glutamyltransferase 1
243228_at	0.721	0.017713	4.25	-4.58	3.54	GTF3C4	general transcription factor IIIC subunit 4
243114_at	0.721	0.017744	4.24	-4.58	3.62
228227_at	0.721	0.017755	4.24	-4.58	3.62	ITGB1BP1	integrin subunit beta 1 binding protein 1
237032_x_at	0.721	0.017766	4.24	-4.58	3.55	SIPA1L1	signal induced proliferation associated 1 like 1
242718_at	0.721	0.01777	-4.24	-4.58	-4.2
240083_at	0.721	0.017801	-4.24	-4.58	-3.73	SNORD112///MEG8	small nucleolar RNA, C/D box 112///maternally expressed 8 (non-protein coding)
230101_at	0.721	0.017805	-4.24	-4.58	-3.53	CXCL2	C-X-C motif chemokine ligand 2
1552766_at	0.721	0.017835	-4.24	-4.58	-6.05	HS6ST2	heparan sulfate 6-O-sulfotransferase 2
1563541_at	0.721	0.017835	-4.24	-4.58	-3.52
242638_at	0.721	0.017847	-4.24	-4.58	-3.64	LOC101928731	uncharacterized LOC101928731
238196_at	0.721	0.017869	-4.24	-4.58	-3.68	LOC285095	uncharacterized LOC285095
244568_at	0.721	0.017884	-4.23	-4.58	-3.59
243784_s_at	0.721	0.017896	-4.23	-4.58	-4.25	LOC100272217	uncharacterized LOC100272217
241411_at	0.721	0.017926	-4.23	-4.58	-3.52
224339_s_at	0.721	0.017927	-4.23	-4.58	-3.68	ANGPTL1	angiopoietin like 1
201525_at	0.721	0.017949	-4.23	-4.58	-4.02	APOD	apolipoprotein D
230094_at	0.721	0.017963	-4.23	-4.58	-3.53	KLF13	Kruppel like factor 13
236307_at	0.721	0.017965	-4.23	-4.58	-3.73
240999_at	0.721	0.017996	4.23	-4.58	3.74	LOC100287704	uncharacterized LOC100287704
208604_s_at	0.721	0.018007	4.22	-4.58	4.11	HOXA3	homeobox A3
1555413_s_at	0.721	0.018007	-4.22	-4.58	-4.01	FBXL21	F-box and leucine rich repeat protein 21 (gene/pseudogene)
209557_s_at	0.721	0.018019	-4.22	-4.58	-3.52	NCDN	neurochondrin
243165_at	0.721	0.018021	-4.22	-4.58	-4.31	BTF3	basic transcription factor 3
207873_x_at	0.721	0.018031	4.22	-4.58	3.58	SEZ6L	seizure related 6 homolog like
233188_at	0.721	0.018033	4.22	-4.58	3.68	GALNT18	polypeptide N-acetylgalactosaminyltransferase 18
1565554_at	0.721	0.018042	4.22	-4.58	4.46	LINC00628	long intergenic non-protein coding RNA 628
219196_at	0.721	0.018057	-4.22	-4.58	-3.54	SCG3	secretogranin III
208410_x_at	0.721	0.018067	4.22	-4.58	3.91	AMELX	amelogenin, X-linked
1553169_at	0.721	0.01807	4.22	-4.58	3.63	LRRN4	leucine rich repeat neuronal 4
233507_at	0.721	0.018075	4.22	-4.58	3.71
1558277_at	0.721	0.018093	4.22	-4.58	3.53	ZNF740	zinc finger protein 740
204724_s_at	0.721	0.018094	-4.22	-4.58	-4.27	COL9A3	collagen type IX alpha 3 chain
210352_at	0.721	0.018095	-4.22	-4.58	-4.14	BRD8	bromodomain containing 8
210618_at	0.721	0.018106	-4.22	-4.58	-3.82	RAP1GAP	RAP1 GTPase activating protein
220289_s_at	0.721	0.018139	4.21	-4.58	4.43	AIM1L	absent in melanoma 1-like
1566288_at	0.721	0.018147	4.21	-4.58	4.14	OR2M4	olfactory receptor family 2 subfamily M member 4
1557151_at	0.721	0.018169	-4.21	-4.58	-5.08
233684_at	0.721	0.018177	4.21	-4.58	4.44
209816_at	0.721	0.018179	-4.21	-4.58	-3.49	PTCH1	patched 1
1565923_at	0.721	0.018187	-4.21	-4.58	-4
1564421_at	0.721	0.018199	4.21	-4.58	4.73	DLGAP2-AS1	DLGAP2 antisense RNA 1
209994_s_at	0.721	0.018209	-4.21	-4.58	-3.54	ABCB4///ABCB1	ATP binding cassette subfamily B member 4///ATP binding cassette subfamily B member 1
217268_at	0.721	0.018215	-4.21	-4.58	-5.02	RAB7A	RAB7A, member RAS oncogene family
235720_at	0.721	0.018223	4.21	-4.58	3.59	CRIP3	cysteine rich protein 3
204368_at	0.721	0.018236	-4.21	-4.58	-4.17	SLCO2A1	solute carrier organic anion transporter family member 2A1
243733_at	0.721	0.01824	4.21	-4.58	3.5
234474_x_at	0.721	0.018244	-4.21	-4.58	-4.59	IL6ST	interleukin 6 signal transducer
205179_s_at	0.721	0.018258	4.2	-4.58	3.91	ADAM8	ADAM metallopeptidase domain 8
240316_at	0.721	0.01826	4.2	-4.58	3.7	C9orf57	chromosome 9 open reading frame 57
204467_s_at	0.721	0.01826	-4.2	-4.58	-3.89	SNCA	synuclein alpha
213602_s_at	0.721	0.018272	-4.2	-4.58	-3.51
1559053_at	0.721	0.018279	4.2	-4.58	3.52
1563658_a_at	0.721	0.01829	-4.2	-4.58	-4.71	SYT9	synaptotagmin 9
202627_s_at	0.721	0.018298	4.2	-4.58	3.48	SERPINE1	serpin family E member 1
1560941_a_at	0.721	0.018306	4.2	-4.58	3.62	SACS-AS1	SACS antisense RNA 1
1560132_a_at	0.721	0.018316	4.2	-4.58	3.49	LOC101927432	uncharacterized LOC101927432
206297_at	0.721	0.018318	4.2	-4.58	3.5	CTRC	chymotrypsin C
210456_at	0.721	0.018321	4.2	-4.58	3.5	PCYT1B	phosphate cytidylyltransferase 1, choline, beta
234154_at	0.721	0.018323	-4.2	-4.58	-3.71
231951_at	0.721	0.018326	-4.2	-4.58	-4.02	GNAO1	G protein subunit alpha o1
1569551_at	0.721	0.018334	4.2	-4.58	3.86
240735_at	0.721	0.018371	-4.2	-4.58	-3.49	CDC42BPA	CDC42 binding protein kinase alpha
1559049_a_at	0.721	0.018372	4.2	-4.58	3.95
244526_at	0.721	0.018374	-4.2	-4.58	-3.76	RASGRP3	RAS guanyl releasing protein 3
1552906_at	0.721	0.018385	-4.2	-4.58	-4.58	FMR1NB	fragile X mental retardation 1 neighbor
228982_s_at	0.721	0.018392	4.19	-4.58	3.49	USP42	ubiquitin specific peptidase 42
206579_at	0.721	0.018427	4.19	-4.58	4.09	ZKSCAN8	zinc finger with KRAB and SCAN domains 8
213176_s_at	0.721	0.018432	-4.19	-4.58	-3.52	LTBP4	latent transforming growth factor beta binding protein 4
1559656_a_at	0.721	0.018436	4.19	-4.58	3.5	MAMDC2-AS1	MAMDC2 antisense RNA 1
39318_at	0.721	0.018441	-4.19	-4.58	-3.54	TCL1A	T-cell leukemia/lymphoma 1A
244513_at	0.721	0.018443	4.19	-4.58	3.92	TMEM161B	transmembrane protein 161B
1566276_at	0.721	0.018446	-4.19	-4.58	-3.49	OR5E1P	olfactory receptor family 5 subfamily E member 1 pseudogene
1564721_at	0.721	0.018456	-4.19	-4.58	-3.54	LOC101927588	uncharacterized LOC101927588
204952_at	0.721	0.018457	4.19	-4.58	3.65	LYPD3	LY6/PLAUR domain containing 3
233525_s_at	0.721	0.018459	-4.19	-4.58	-3.48	LINC00475	long intergenic non-protein coding RNA 475
234603_at	0.721	0.018463	-4.19	-4.58	-3.48
204763_s_at	0.721	0.018471	-4.19	-4.58	-3.77	GNAO1	G protein subunit alpha o1
203948_s_at	0.721	0.018474	4.19	-4.58	3.66	MPO	myeloperoxidase
237499_at	0.721	0.01849	-4.19	-4.58	-3.47
221365_at	0.721	0.018493	-4.19	-4.58	-3.47	MLNR	motilin receptor
244818_at	0.721	0.018509	4.19	-4.58	3.86	ZNF780B	zinc finger protein 780B
215620_at	0.721	0.018511	4.19	-4.58	3.47	RREB1	ras responsive element binding protein 1
237347_at	0.721	0.018513	4.19	-4.58	3.48
234366_x_at	0.721	0.018526	-4.18	-4.58	-3.97	IGLJ3///CKAP2///IGLV@///IGLC1	immunoglobulin lambda joining 3///cytoskeleton associated protein 2///immunoglobulin lambda variable cluster///immunoglobulin lambda constant 1
215458_s_at	0.721	0.018531	4.18	-4.58	3.59	SMURF1	SMAD specific E3 ubiquitin protein ligase 1
222892_s_at	0.721	0.018536	4.18	-4.58	3.99	TMEM40	transmembrane protein 40
208098_at	0.721	0.018544	-4.18	-4.58	-4.04	OR12D3///OR5V1	olfactory receptor family 12 subfamily D member 3///olfactory receptor family 5 subfamily V member 1
1567274_at	0.721	0.018549	4.18	-4.58	3.5
234034_at	0.721	0.018556	-4.18	-4.58	-3.61
242502_at	0.721	0.01862	-4.18	-4.58	-3.56	KCNH5	potassium voltage-gated channel subfamily H member 5
222933_at	0.721	0.018623	4.18	-4.58	3.61	MORN1	MORN repeat containing 1
231384_at	0.721	0.018627	-4.18	-4.58	-4.63	GRIN2A	glutamate ionotropic receptor NMDA type subunit 2A
1561485_at	0.721	0.018637	4.18	-4.58	4.42	IQCA1	IQ motif containing with AAA domain 1
206025_s_at	0.721	0.01865	4.18	-4.58	3.46	TNFAIP6	TNF alpha induced protein 6
239259_at	0.721	0.018675	4.17	-4.58	3.47	ZNF557	zinc finger protein 557
1563083_s_at	0.721	0.018688	4.17	-4.58	4.13	LINC00486	long intergenic non-protein coding RNA 486
225328_at	0.721	0.018709	-4.17	-4.58	-4.32	FBXO32	F-box protein 32
242587_at	0.721	0.018714	-4.17	-4.58	-3.46	SLC9A9	solute carrier family 9 member A9
1553851_at	0.721	0.018717	-4.17	-4.58	-3.48	SPIC	Spi-C transcription factor
237581_at	0.721	0.018726	-4.17	-4.58	-3.47
238036_at	0.721	0.018752	-4.17	-4.58	-4.44	SHE	Src homology 2 domain containing E
211766_s_at	0.721	0.018754	-4.17	-4.58	-4.23	PNLIPRP2	pancreatic lipase related protein 2 (gene/pseudogene)
242436_at	0.721	0.018763	-4.17	-4.58	-4.2
236972_at	0.721	0.01881	-4.16	-4.58	-5.88	TRIM63	tripartite motif containing 63
205817_at	0.721	0.018814	4.16	-4.58	3.46	SIX1	SIX homeobox 1
231364_at	0.721	0.018819	4.16	-4.58	3.61	NFIA-AS2	NFIA antisense RNA 2
1558786_at	0.721	0.018824	-4.16	-4.58	-4.16	TSPAN3	tetraspanin 3
214598_at	0.721	0.018825	-4.16	-4.58	-3.62	CLDN8	claudin 8
219476_at	0.721	0.018826	4.16	-4.58	5.18	C1orf116	chromosome 1 open reading frame 116
231356_at	0.721	0.01885	-4.16	-4.58	-3.82
235180_at	0.721	0.018851	4.16	-4.58	3.93	STYX	serine/threonine/tyrosine interacting protein
1555498_at	0.721	0.018857	-4.16	-4.58	-3.51
228804_at	0.721	0.018865	-4.16	-4.58	-3.6	DGCR5	DiGeorge syndrome critical region gene 5 (non-protein coding)
241753_at	0.721	0.018884	4.16	-4.58	3.5
221628_s_at	0.721	0.018912	4.16	-4.58	3.48	GLYR1	glyoxylate reductase 1 homolog
222213_x_at	0.721	0.018939	4.15	-4.58	3.51
236936_at	0.721	0.018948	-4.15	-4.58	-3.97
1554253_a_at	0.721	0.018959	4.15	-4.58	3.45	CERS3	ceramide synthase 3
244655_at	0.721	0.018991	-4.15	-4.58	-3.66	LOC100507311	uncharacterized LOC100507311
217065_at	0.721	0.019028	-4.15	-4.58	-3.97
220906_at	0.721	0.019036	-4.15	-4.58	-3.45
231981_at	0.721	0.019037	-4.15	-4.58	-3.46	PRLR	prolactin receptor
235254_at	0.721	0.019037	-4.15	-4.58	-3.6
227707_at	0.721	0.019069	-4.14	-4.58	-3.51	MYLIP	myosin regulatory light chain interacting protein
1556793_a_at	0.721	0.019071	4.14	-4.58	3.44	FAM83C	family with sequence similarity 83 member C
1562979_at	0.721	0.019074	4.14	-4.58	3.45
227826_s_at	0.721	0.019088	-4.14	-4.58	-3.48	SORBS2	sorbin and SH3 domain containing 2
243594_x_at	0.721	0.019088	4.14	-4.58	3.85	SPIRE2	spire type actin nucleation factor 2
239838_at	0.721	0.019106	4.14	-4.58	3.64	ZNF776	zinc finger protein 776
206140_at	0.721	0.019114	4.14	-4.58	3.45	LHX2	LIM homeobox 2
233436_at	0.721	0.019125	4.14	-4.58	4.6	MTBP	MDM2 binding protein
236871_s_at	0.721	0.019154	-4.14	-4.58	-3.61	IQCF4///IQCF3	IQ motif containing F5 pseudogene///IQ motif containing F3
1569098_s_at	0.721	0.019157	4.14	-4.58	3.47	TP53BP1	tumor protein p53 binding protein 1
213131_at	0.721	0.019159	-4.14	-4.58	-3.5	OLFM1	olfactomedin 1
244385_at	0.721	0.019187	4.14	-4.58	4.1	KDM4C	lysine demethylase 4C
224019_at	0.721	0.019205	4.13	-4.58	3.57	SCD5	stearoyl-CoA desaturase 5
233501_at	0.721	0.019208	4.13	-4.58	3.43
211044_at	0.721	0.019217	4.13	-4.58	3.94	TRIM14	tripartite motif containing 14
1561088_at	0.721	0.019219	-4.13	-4.58	-3.81	EYA4	EYA transcriptional coactivator and phosphatase 4
241072_s_at	0.721	0.019221	4.13	-4.58	3.45	IGF1	insulin like growth factor 1
235340_at	0.721	0.019222	4.13	-4.58	3.44	GANC	glucosidase alpha, neutral C
243700_x_at	0.721	0.019237	-4.13	-4.58	-3.42	FAM47A	family with sequence similarity 47 member A
1562938_at	0.721	0.019252	-4.13	-4.58	-3.55	FAHD2CP	fumarylacetoacetate hydrolase domain containing 2C, pseudogene
228307_at	0.721	0.019253	-4.13	-4.58	-3.86	EMILIN3	elastin microfibril interfacer 3
237395_at	0.721	0.019276	-4.13	-4.58	-3.43	CYP4Z1	cytochrome P450 family 4 subfamily Z member 1
205325_at	0.721	0.019279	-4.13	-4.58	-3.7	PHYHIP	phytanoyl-CoA 2-hydroxylase interacting protein
234569_at	0.721	0.019285	-4.13	-4.58	-3.72
1563391_at	0.721	0.019286	4.13	-4.58	3.45	LOC101927553	uncharacterized LOC101927553
234720_s_at	0.721	0.019287	-4.13	-4.58	-3.43	TOB2	transducer of ERBB2, 2
1554655_a_at	0.721	0.019297	-4.13	-4.58	-3.44	RPRML	reprimo like
231628_s_at	0.721	0.019311	-4.13	-4.58	-3.46	SERPINB6	serpin family B member 6
234215_at	0.721	0.019337	-4.13	-4.58	-3.55
1556200_a_at	0.721	0.01934	4.12	-4.58	3.42	C10orf90	chromosome 10 open reading frame 90
237319_at	0.721	0.019353	-4.12	-4.58	-3.44	PRR30	proline rich 30
205576_at	0.721	0.01936	-4.12	-4.58	-3.43	SERPIND1	serpin family D member 1
207823_s_at	0.721	0.01936	-4.12	-4.58	-3.64	AIF1	allograft inflammatory factor 1
201451_x_at	0.721	0.019388	4.12	-4.58	3.42	RHEB	Ras homolog enriched in brain
207816_at	0.721	0.019392	-4.12	-4.58	-4.11	LALBA	lactalbumin alpha
1555545_at	0.721	0.019401	4.12	-4.58	3.45	KLK2	kallikrein related peptidase 2
1569909_at	0.721	0.019403	4.12	-4.58	3.61	KRT79	keratin 79
229037_at	0.721	0.01941	4.12	-4.58	3.47	TRIM69	tripartite motif containing 69
216742_at	0.721	0.019418	-4.12	-4.58	-3.63
221300_at	0.721	0.019419	4.12	-4.58	3.98	NPAP1	nuclear pore associated protein 1
207776_s_at	0.721	0.019433	-4.12	-4.58	-5.07	CACNB2	calcium voltage-gated channel auxiliary subunit beta 2
1557736_at	0.721	0.019453	4.12	-4.58	3.42	NKTR	natural killer cell triggering receptor
1552852_a_at	0.721	0.019468	-4.12	-4.58	-3.52	ZSCAN4	zinc finger and SCAN domain containing 4
237870_at	0.721	0.019477	4.12	-4.58	3.52	NQO2	NAD(P)H quinone dehydrogenase 2
1554897_s_at	0.721	0.019485	4.11	-4.58	3.92	RHBDL2	rhomboid like 2
1557564_at	0.721	0.019499	-4.11	-4.58	-3.86	ALKBH3-AS1	ALKBH3 antisense RNA 1
1558765_a_at	0.721	0.019501	4.11	-4.58	3.41
240709_at	0.721	0.019538	-4.11	-4.58	-3.43	SEZ6L	seizure related 6 homolog like
206786_at	0.721	0.019541	-4.11	-4.58	-4.05	HTN3	histatin 3
239853_at	0.721	0.019544	4.11	-4.58	4.42	KLC3	kinesin light chain 3
1555100_at	0.721	0.019547	4.11	-4.58	3.7	APLF	aprataxin and PNKP like factor
238630_at	0.721	0.019551	4.11	-4.58	3.59	OPA3	optic atrophy 3 (autosomal recessive, with chorea and spastic paraplegia)
206084_at	0.721	0.019559	-4.11	-4.58	-4.39	PTPRR	protein tyrosine phosphatase, receptor type R
212592_at	0.721	0.019562	-4.11	-4.58	-5.41	JCHAIN	joining chain of multimeric IgA and IgM
237455_at	0.721	0.019569	4.11	-4.58	3.99
1561247_at	0.721	0.019576	4.11	-4.58	3.5	LINC01581	long intergenic non-protein coding RNA 1581
244258_at	0.721	0.019599	4.11	-4.58	3.95
221623_at	0.721	0.019608	-4.11	-4.58	-3.78	BCAN	brevican
211821_x_at	0.721	0.019654	4.1	-4.58	3.45	GYPA	glycophorin A (MNS blood group)
240944_at	0.721	0.019674	4.1	-4.58	3.68	LOC101929027	uncharacterized LOC101929027
1554696_s_at	0.721	0.019705	4.1	-4.58	3.49	TYMS	thymidylate synthetase
1569431_at	0.721	0.019722	4.1	-4.58	3.75	PAFAH1B2	platelet activating factor acetylhydrolase 1b catalytic subunit 2
204793_at	0.721	0.019731	-4.1	-4.58	-4.17	GPRASP1	G protein-coupled receptor associated sorting protein 1
1564736_a_at	0.721	0.019783	-4.09	-4.58	-3.48	CASP12	caspase 12 (gene/pseudogene)
1565758_at	0.721	0.019804	-4.09	-4.58	-4.05
205127_at	0.721	0.019804	4.09	-4.58	3.49	PTGS1	prostaglandin-endoperoxide synthase 1
208305_at	0.721	0.019805	-4.09	-4.58	-3.4	PGR	progesterone receptor
222072_at	0.721	0.019813	-4.09	-4.58	-3.4	ADD3-AS1	ADD3 antisense RNA 1
224033_at	0.721	0.019828	-4.09	-4.58	-3.64
210839_s_at	0.721	0.019833	-4.09	-4.58	-4.1	ENPP2	ectonucleotide pyrophosphatase/phosphodiesterase 2
242643_x_at	0.721	0.019835	-4.09	-4.58	-3.72
217594_at	0.721	0.019872	4.09	-4.58	3.5	ZCCHC11	zinc finger CCHC-type containing 11
215420_at	0.721	0.019877	-4.09	-4.58	-3.75	IHH	indian hedgehog
1554672_at	0.721	0.019879	4.09	-4.58	3.48	TTC26	tetratricopeptide repeat domain 26
1559575_a_at	0.721	0.019892	4.09	-4.58	4.35	AQP12B///AQP12A	aquaporin 12B///aquaporin 12A
231282_at	0.721	0.019914	4.08	-4.58	3.41
224221_s_at	0.721	0.019928	4.08	-4.58	3.97	VAV3	vav guanine nucleotide exchange factor 3
215788_at	0.721	0.019933	4.08	-4.58	3.57	CFAP74	cilia and flagella associated protein 74
1553296_at	0.721	0.019943	4.08	-4.58	3.38	ADGRG7	adhesion G protein-coupled receptor G7
240076_at	0.721	0.019947	4.08	-4.58	3.55
1552955_at	0.721	0.019988	4.08	-4.58	3.83	LINC00208	long intergenic non-protein coding RNA 208
241291_at	0.721	0.019992	-4.08	-4.58	-4.64	LINC01541	long intergenic non-protein coding RNA 1541
235842_at	0.721	0.020002	4.08	-4.58	4.07
234240_at	0.721	0.020003	4.08	-4.58	3.85	GSN	gelsolin
233635_at	0.721	0.020038	-4.08	-4.58	-3.57
236890_at	0.721	0.020084	-4.07	-4.58	-3.5	MTG2	mitochondrial ribosome associated GTPase 2
215935_at	0.721	0.020087	4.07	-4.58	4.3	SPATA31A5///SPATA31A3///SPATA31A1///SPATA31A6///SPATA31A7	SPATA31 subfamily A member 5///SPATA31 subfamily A member 3///SPATA31 subfamily A member 1///SPATA31 subfamily A member 6///SPATA31 subfamily A member 7
206671_at	0.721	0.020096	-4.07	-4.58	-3.38	SAG	S-antigen visual arrestin
219436_s_at	0.721	0.020106	-4.07	-4.58	-6.13	EMCN	endomucin
237348_at	0.721	0.020112	4.07	-4.58	4.34
233419_at	0.721	0.020113	4.07	-4.58	3.38
1562839_at	0.721	0.020115	-4.07	-4.58	-3.39	LINC00894	long intergenic non-protein coding RNA 894
239344_at	0.721	0.02012	-4.07	-4.58	-3.47
236334_at	0.721	0.020121	-4.07	-4.58	-3.41
216522_at	0.721	0.020126	4.07	-4.58	3.8	OR2B6	olfactory receptor family 2 subfamily B member 6
237862_at	0.721	0.020134	4.07	-4.58	3.38
235570_at	0.721	0.020137	-4.07	-4.58	-3.69	RBMS3	RNA binding motif single stranded interacting protein 3
1567559_s_at	0.721	0.020162	4.07	-4.58	3.57	TREML4	triggering receptor expressed on myeloid cells like 4
244120_at	0.721	0.020211	-4.06	-4.58	-4.4
231125_at	0.721	0.02022	-4.06	-4.58	-3.65
219763_at	0.721	0.020225	4.06	-4.58	3.52	DENND1A	DENN domain containing 1A
210374_x_at	0.721	0.02024	-4.06	-4.58	-3.4	PTGER3	prostaglandin E receptor 3
223395_at	0.721	0.020247	-4.06	-4.58	-3.38	ABI3BP	ABI family member 3 binding protein
243425_at	0.721	0.020251	4.06	-4.58	4.13	LOC101928557	uncharacterized LOC101928557
206650_at	0.721	0.020268	4.06	-4.58	3.61	IQCC	IQ motif containing C
1553311_at	0.721	0.020271	4.06	-4.58	3.66	C20orf197	chromosome 20 open reading frame 197
1570415_at	0.721	0.020283	4.06	-4.58	3.79	DDX52	DEAD-box helicase 52
244393_x_at	0.721	0.020285	4.06	-4.58	3.41
1555110_a_at	0.721	0.020287	4.06	-4.58	3.45	KLHL3	kelch like family member 3
242030_at	0.721	0.020289	4.06	-4.58	3.44
230589_at	0.721	0.02029	-4.06	-4.58	-3.9	TRAF3IP2-AS1	TRAF3IP2 antisense RNA 1
224077_at	0.721	0.020291	-4.06	-4.58	-3.68	WHSC1L1	Wolf-Hirschhorn syndrome candidate 1-like 1
230037_at	0.721	0.0203	-4.06	-4.58	-3.37	CD8B	CD8b molecule
222161_at	0.721	0.020309	-4.06	-4.58	-3.43	NAALAD2	N-acetylated alpha-linked acidic dipeptidase 2
217022_s_at	0.721	0.020323	-4.06	-4.58	-4.65	IGHA2///IGHA1///IGH	immunoglobulin heavy constant alpha 2 (A2m marker)///immunoglobulin heavy constant alpha 1///immunoglobulin heavy locus
228731_at	0.721	0.020329	-4.06	-4.58	-3.51	GUCY1A2	guanylate cyclase 1 soluble subunit alpha 2
228499_at	0.721	0.020343	4.06	-4.58	3.65	PFKFB4	6-phosphofructo-2-kinase/fructose-2,6-biphosphatase 4
1561566_at	0.721	0.020345	-4.06	-4.58	-3.6	LINC01098	long intergenic non-protein coding RNA 1098
242896_at	0.721	0.020346	-4.06	-4.58	-3.64
229358_at	0.721	0.020352	-4.05	-4.58	-4.4	IHH	indian hedgehog
206863_x_at	0.721	0.020358	4.05	-4.58	3.5	HRK	harakiri, BCL2 interacting protein
237678_at	0.721	0.020363	4.05	-4.58	3.67
241548_at	0.721	0.020373	-4.05	-4.58	-4.39
203398_s_at	0.721	0.020388	4.05	-4.58	3.39	GALNT3	polypeptide N-acetylgalactosaminyltransferase 3
222008_at	0.721	0.020422	-4.05	-4.58	-4.21	COL9A1	collagen type IX alpha 1 chain
224146_s_at	0.721	0.020432	-4.05	-4.58	-3.55	ABCC11	ATP binding cassette subfamily C member 11
1567238_at	0.721	0.020454	4.05	-4.58	4.39	OR2L2	olfactory receptor family 2 subfamily L member 2
1553868_a_at	0.721	0.020456	4.05	-4.58	3.54	KIAA0825	KIAA0825
238552_at	0.721	0.020465	-4.05	-4.58	-3.66
1561232_at	0.721	0.020489	4.05	-4.58	3.38	CASC11	cancer susceptibility candidate 11 (non-protein coding)
216618_at	0.721	0.020489	4.05	-4.58	3.84
1565778_at	0.721	0.020499	-4.05	-4.58	-3.8	ABCA8	ATP binding cassette subfamily A member 8
238312_s_at	0.721	0.020509	-4.04	-4.58	-3.55	B4GALT3	beta-1,4-galactosyltransferase 3
229326_at	0.721	0.020512	4.04	-4.58	3.74	TNFSF12-TNFSF13///TNFSF12///TNFSF13	TNFSF12-TNFSF13 readthrough///tumor necrosis factor superfamily member 12///tumor necrosis factor superfamily member 13
243567_at	0.721	0.02052	-4.04	-4.58	-3.35
1561820_at	0.721	0.020523	4.04	-4.58	3.38	SCN8A	sodium voltage-gated channel alpha subunit 8
209242_at	0.721	0.020531	-4.04	-4.58	-6.03	PEG3	paternally expressed 3
202580_x_at	0.721	0.020544	4.04	-4.58	3.35	FOXM1	forkhead box M1
216188_at	0.721	0.02055	-4.04	-4.58	-3.35	MYCNOS	MYCN opposite strand
205096_at	0.721	0.020579	4.04	-4.58	3.35	POM121	POM121 transmembrane nucleoporin
242653_at	0.721	0.020605	4.04	-4.58	3.95	DCC	DCC netrin 1 receptor
211843_x_at	0.721	0.020605	-4.04	-4.58	-3.82	CYP3A7-CYP3A51P	CYP3A7-CYP3A51P readthrough
208000_at	0.721	0.020624	4.04	-4.58	3.51	GML	glycosylphosphatidylinositol anchored molecule like
1557699_x_at	0.721	0.020625	4.04	-4.58	3.36
220056_at	0.721	0.020637	4.04	-4.58	3.45	IL22RA1	interleukin 22 receptor subunit alpha 1
1563110_at	0.721	0.020641	-4.04	-4.58	-3.67
1569812_at	0.721	0.020656	-4.03	-4.58	-3.34
243894_at	0.721	0.020672	4.03	-4.58	4.36	SLC41A2	solute carrier family 41 member 2
227302_s_at	0.721	0.0207	4.03	-4.58	3.89	LLGL1///FLII	LLGL1, scribble cell polarity complex component///FLII, actin remodeling protein
202095_s_at	0.721	0.020705	4.03	-4.58	3.35	BIRC5	baculoviral IAP repeat containing 5
223836_at	0.721	0.020714	4.03	-4.58	4.4	FGFBP2	fibroblast growth factor binding protein 2
204407_at	0.721	0.020714	4.03	-4.58	4.11	TTF2	transcription termination factor 2
1569433_at	0.721	0.020725	4.03	-4.58	3.72	SAMD5	sterile alpha motif domain containing 5
233015_at	0.721	0.020728	4.03	-4.58	3.42	MBNL1	muscleblind like splicing regulator 1
232737_s_at	0.721	0.020754	-4.03	-4.58	-5.53	ENPP3	ectonucleotide pyrophosphatase/phosphodiesterase 3
1559545_at	0.721	0.020769	4.03	-4.58	3.64	LOC101930404///SNORD116-28///SNORD115-26///SNORD115-13///SNORD115-7///SNORD116-22///SNORD116-4///PWARSN///SNORD107///SNRPN///IPW	uncharacterized LOC101930404///small nucleolar RNA, C/D box 116-28///small nucleolar RNA, C/D box 115-26///small nucleolar RNA, C/D box 115-13///small nucleolar RNA, C/D box 115-7///small nucleolar RNA, C/D box 116-22///small nucleolar RNA, C/D box 116-4///Prader Willi/Angelman region RNA, SNRPN neighbor///small nucleolar RNA, C/D box 107///small nuclear ribonucleoprotein polypeptide N///imprinte…
202005_at	0.721	0.020774	4.03	-4.58	3.49	ST14	suppression of tumorigenicity 14
1556212_x_at	0.721	0.020787	4.03	-4.58	3.46
214580_x_at	0.721	0.020791	4.03	-4.58	5.99	KRT6C///KRT6B///KRT6A	keratin 6C///keratin 6B///keratin 6A
1559876_at	0.721	0.020792	4.03	-4.58	3.6
1559255_a_at	0.721	0.020793	-4.03	-4.58	-3.4
241789_at	0.721	0.020809	-4.02	-4.58	-3.39	RBMS3	RNA binding motif single stranded interacting protein 3
237066_at	0.721	0.020814	4.02	-4.58	4.51
228132_at	0.721	0.020826	4.02	-4.58	3.52	ABLIM2	actin binding LIM protein family member 2
233516_s_at	0.721	0.020828	4.02	-4.58	3.38	SPAG17	sperm associated antigen 17
211868_x_at	0.721	0.020834	-4.02	-4.58	-4.23	IGHV4-31///IGHM///IGHG3///IGHG2///IGHG1///IGHD///IGHA2///IGHA1///IGH	immunoglobulin heavy variable 4-31///immunoglobulin heavy constant mu///immunoglobulin heavy constant gamma 3 (G3m marker)///immunoglobulin heavy constant gamma 2 (G2m marker)///immunoglobulin heavy constant gamma 1 (G1m marker)///immunoglobulin heavy constant delta///immunoglobulin heavy constant alpha 2 (A2m marker)///immunoglobulin heavy constant alpha 1///immunoglobulin heavy locus
206646_at	0.721	0.020834	-4.02	-4.58	-3.6	GLI1	GLI family zinc finger 1
207374_at	0.721	0.020844	4.02	-4.58	3.42	PLSCR2	phospholipid scramblase 2
228973_at	0.721	0.020865	-4.02	-4.58	-4.93	DLG2	discs large MAGUK scaffold protein 2
233698_at	0.721	0.02088	-4.02	-4.58	-3.62
213960_at	0.721	0.020893	-4.02	-4.58	-3.61	NTRK3	neurotrophic receptor tyrosine kinase 3
236464_at	0.721	0.02093	-4.02	-4.58	-3.38
204822_at	0.721	0.020947	4.02	-4.58	3.54	TTK	TTK protein kinase
205230_at	0.721	0.020975	4.01	-4.58	3.33	RPH3A	rabphilin 3A
203666_at	0.721	0.020977	-4.01	-4.58	-5.2	CXCL12	C-X-C motif chemokine ligand 12
240320_at	0.721	0.021022	4.01	-4.58	3.32	RNF212B	ring finger protein 212B
229774_at	0.721	0.021034	-4.01	-4.58	-3.84	CXXC4	CXXC finger protein 4
228882_at	0.721	0.021047	-4.01	-4.58	-3.6	TUB	tubby bipartite transcription factor
235548_at	0.721	0.021061	4.01	-4.58	4.58	APCDD1L	APC down-regulated 1 like
206923_at	0.721	0.021067	4.01	-4.58	3.88	PRKCA	protein kinase C alpha
224449_at	0.721	0.02107	4.01	-4.58	3.36	DDI2///RSC1A1	DNA damage inducible 1 homolog 2///regulatory solute carrier protein, family 1, member 1
241645_at	0.721	0.021083	-4.01	-4.58	-3.56
1562349_at	0.721	0.021085	4.01	-4.58	3.81	TRAPPC2	trafficking protein particle complex 2
39402_at	0.721	0.021085	4.01	-4.58	3.4	IL1B	interleukin 1 beta
224137_at	0.721	0.021091	4.01	-4.58	3.52	CACNG7	calcium voltage-gated channel auxiliary subunit gamma 7
221009_s_at	0.721	0.021092	4.01	-4.58	5.54	ANGPTL4	angiopoietin like 4
1564473_at	0.721	0.021098	4.01	-4.58	3.47	ESCO2	establishment of sister chromatid cohesion N-acetyltransferase 2
243449_at	0.721	0.021107	4.01	-4.58	3.67
234879_at	0.721	0.021107	-4.01	-4.58	-3.44
1561039_a_at	0.721	0.021117	4	-4.58	3.44	ZNF81	zinc finger protein 81
237088_at	0.721	0.02114	4	-4.58	3.9	LINC00244	long intergenic non-protein coding RNA 244
223732_at	0.721	0.02114	4	-4.58	3.69	SLC23A1	solute carrier family 23 member 1
233045_at	0.721	0.021144	4	-4.58	3.34
217623_at	0.721	0.021147	-4	-4.58	-3.6	MYLK3	myosin light chain kinase 3
215686_x_at	0.721	0.02115	-4	-4.58	-3.32	TFAP2B	transcription factor AP-2 beta
237215_s_at	0.721	0.021152	4	-4.58	3.8	TFRC	transferrin receptor
215474_at	0.721	0.021152	-4	-4.58	-3.41
1563868_a_at	0.721	0.021169	-4	-4.58	-3.32	SPATA31E1	SPATA31 subfamily E member 1
211925_s_at	0.721	0.021175	-4	-4.58	-3.48	PLCB1	phospholipase C beta 1
240674_at	0.721	0.021192	4	-4.58	3.94	JARID2	jumonji and AT-rich interaction domain containing 2
1555151_s_at	0.721	0.021196	4	-4.58	3.71	TDH	L-threonine dehydrogenase (pseudogene)
231982_at	0.721	0.021197	4	-4.58	4.18	SMIM24	small integral membrane protein 24
238874_at	0.721	0.021219	-4	-4.58	-3.31	LOC100506860	uncharacterized LOC100506860
1564499_at	0.721	0.02123	-4	-4.58	-3.91
217085_at	0.721	0.021233	-4	-4.58	-4.5
243580_at	0.721	0.021263	-4	-4.58	-3.93	GNA14	G protein subunit alpha 14
211517_s_at	0.721	0.021273	-3.99	-4.58	-3.34	IL5RA	interleukin 5 receptor subunit alpha
219747_at	0.721	0.021289	-3.99	-4.58	-4.48	NDNF	neuron derived neurotrophic factor
224293_at	0.721	0.021292	-3.99	-4.58	-4.27	TTTY10	testis-specific transcript, Y-linked 10 (non-protein coding)
241643_at	0.721	0.021296	-3.99	-4.58	-3.35	TLK1	tousled like kinase 1
205477_s_at	0.721	0.021314	-3.99	-4.58	-3.38	AMBP	alpha-1-microglobulin/bikunin precursor
237994_at	0.721	0.021328	3.99	-4.58	3.57
216167_at	0.721	0.021331	3.99	-4.58	3.58	LRRN2	leucine rich repeat neuronal 2
234666_at	0.721	0.021334	-3.99	-4.58	-4.97
202240_at	0.721	0.021345	3.99	-4.58	3.64	PLK1	polo like kinase 1
231053_at	0.721	0.021351	-3.99	-4.58	-3.31	KCNB1	potassium voltage-gated channel subfamily B member 1
1559884_at	0.721	0.021369	3.99	-4.58	3.34	CDKN2B-AS1	CDKN2B antisense RNA 1
229556_at	0.721	0.021375	-3.99	-4.58	-3.49	LOC100288893	uncharacterized LOC100288893
233641_s_at	0.721	0.021375	-3.99	-4.58	-3.37	FAM167A	family with sequence similarity 167 member A
219909_at	0.721	0.021376	-3.99	-4.58	-3.6	MMP28	matrix metallopeptidase 28
1569100_a_at	0.721	0.021377	-3.99	-4.58	-3.32	LOC101929450	uncharacterized LOC101929450
241436_at	0.721	0.021393	-3.99	-4.58	-3.35	SCNN1G	sodium channel epithelial 1 gamma subunit
1553108_at	0.721	0.021409	3.99	-4.58	3.66	C5orf24	chromosome 5 open reading frame 24
230633_at	0.721	0.021412	3.99	-4.58	3.67	TMEM102	transmembrane protein 102
234529_at	0.721	0.021427	-3.99	-4.58	-3.33	PCGEM1	PCGEM1, prostate-specific transcript (non-protein coding)
234848_at	0.721	0.021432	3.98	-4.58	3.37
208609_s_at	0.721	0.021459	-3.98	-4.58	-5.15	TNXB///TNXA	tenascin XB///tenascin XA (pseudogene)
221411_at	0.721	0.02146	-3.98	-4.58	-4.23	HOXD12	homeobox D12
229458_s_at	0.721	0.021476	3.98	-4.58	3.7	GALK1	galactokinase 1
1561083_at	0.721	0.02148	3.98	-4.58	3.31	LINC01254	long intergenic non-protein coding RNA 1254
1556623_at	0.721	0.021481	-3.98	-4.58	-3.83
203716_s_at	0.721	0.021484	3.98	-4.58	3.54	DPP4	dipeptidyl peptidase 4
226570_at	0.721	0.02149	3.98	-4.58	3.32	ATP1B3	ATPase Na+/K+ transporting subunit beta 3
1562317_at	0.721	0.021496	-3.98	-4.58	-3.54	FAM186A	family with sequence similarity 186 member A
223827_at	0.721	0.021502	3.98	-4.58	3.36	TNFRSF19	TNF receptor superfamily member 19
1552737_s_at	0.721	0.021523	3.98	-4.58	4.09	WWP2	WW domain containing E3 ubiquitin protein ligase 2
231661_at	0.721	0.021533	3.98	-4.58	4.41	REG3G	regenerating family member 3 gamma
1557026_at	0.721	0.021552	-3.98	-4.58	-3.3	LOC101927787	uncharacterized LOC101927787
207235_s_at	0.721	0.021568	-3.98	-4.58	-4.08	GRM5	glutamate metabotropic receptor 5
236719_at	0.721	0.021608	3.97	-4.58	3.3	ID2-AS1	ID2 antisense RNA 1 (head to head)
215041_s_at	0.721	0.021613	3.97	-4.58	3.43	DOCK9	dedicator of cytokinesis 9
240566_at	0.721	0.021619	-3.97	-4.58	-3.33
227136_s_at	0.721	0.021625	-3.97	-4.58	-4.28	CACUL1	CDK2 associated cullin domain 1
1562389_at	0.721	0.021635	-3.97	-4.58	-4.32	LOC101927359	uncharacterized LOC101927359
234628_at	0.721	0.021636	3.97	-4.58	3.73	RAB28	RAB28, member RAS oncogene family
232275_s_at	0.721	0.021644	-3.97	-4.58	-3.31	HS6ST3	heparan sulfate 6-O-sulfotransferase 3
219642_s_at	0.721	0.021658	-3.97	-4.58	-3.49	PEX5L	peroxisomal biogenesis factor 5 like
243609_at	0.721	0.021679	-3.97	-4.58	-3.77	CYP3A7-CYP3A51P///CYP3A7	CYP3A7-CYP3A51P readthrough///cytochrome P450 family 3 subfamily A member 7
227827_at	0.721	0.021684	-3.97	-4.58	-3.36	SORBS2	sorbin and SH3 domain containing 2
219728_at	0.721	0.021711	-3.97	-4.58	-4.59	MYOT	myotilin
1569624_at	0.721	0.021715	-3.97	-4.58	-4.05
1563369_at	0.721	0.021715	-3.97	-4.58	-3.3	LINC00173	long intergenic non-protein coding RNA 173
219415_at	0.721	0.021719	-3.97	-4.58	-3.99	TTYH1	tweety family member 1
223659_at	0.721	0.021732	3.97	-4.58	3.95	TMPRSS13	transmembrane protease, serine 13
206035_at	0.721	0.021754	3.96	-4.58	3.64	REL	REL proto-oncogene, NF-kB subunit
232717_at	0.721	0.021755	-3.96	-4.58	-3.52	KALRN	kalirin, RhoGEF kinase
211657_at	0.721	0.021758	3.96	-4.58	4.74	CEACAM6	carcinoembryonic antigen related cell adhesion molecule 6
1553183_at	0.721	0.021765	-3.96	-4.58	-3.49	UMODL1	uromodulin like 1
244335_at	0.721	0.021822	-3.96	-4.58	-3.99
1561710_at	0.721	0.021823	-3.96	-4.58	-4.06	SNX19	sorting nexin 19
205102_at	0.721	0.021831	3.96	-4.58	3.31	TMPRSS2	transmembrane protease, serine 2
216397_s_at	0.721	0.02184	3.96	-4.58	3.85	MIR7112///BOP1	microRNA 7112///block of proliferation 1
202285_s_at	0.721	0.021846	3.96	-4.58	3.4	TACSTD2	tumor-associated calcium signal transducer 2
1555195_at	0.721	0.021859	-3.96	-4.58	-3.28	FBXO36	F-box protein 36
1562827_at	0.721	0.021867	3.96	-4.58	3.29	DIO2-AS1	DIO2 antisense RNA 1
214685_at	0.721	0.021885	-3.96	-4.58	-3.31	NOP14-AS1	NOP14 antisense RNA 1
210837_s_at	0.721	0.021889	3.96	-4.58	3.55	PDE4D	phosphodiesterase 4D
208045_at	0.721	0.021898	-3.96	-4.58	-3.29
1553420_at	0.721	0.021898	-3.96	-4.58	-3.49	SATB2-AS1	SATB2 antisense RNA 1
210945_at	0.721	0.02192	-3.95	-4.58	-4.86	COL4A6	collagen type IV alpha 6 chain
211637_x_at	0.721	0.021933	-3.95	-4.58	-3.63	IGHV3-23///IGHV4-31///IGHM///IGHG4///IGHG3///IGHG1///IGHD///IGHA2///IGHA1///IGH	immunoglobulin heavy variable 3-23///immunoglobulin heavy variable 4-31///immunoglobulin heavy constant mu///immunoglobulin heavy constant gamma 4 (G4m marker)///immunoglobulin heavy constant gamma 3 (G3m marker)///immunoglobulin heavy constant gamma 1 (G1m marker)///immunoglobulin heavy constant delta///immunoglobulin heavy constant alpha 2 (A2m marker)///immunoglobulin heavy constant alpha 1///…
1553139_s_at	0.721	0.021954	3.95	-4.58	3.28	PLXNA3	plexin A3
222646_s_at	0.721	0.021998	3.95	-4.58	3.28	ERO1A	endoplasmic reticulum oxidoreductase 1 alpha
1557513_a_at	0.721	0.022001	3.95	-4.58	3.29
242662_at	0.721	0.022021	3.95	-4.58	3.34	PCSK6	proprotein convertase subtilisin/kexin type 6
242401_x_at	0.721	0.022028	3.95	-4.58	4.24
236084_at	0.721	0.022031	-3.95	-4.58	-3.63
240356_s_at	0.721	0.022041	3.95	-4.58	3.28
236063_at	0.721	0.022048	-3.95	-4.58	-3.34
217640_x_at	0.721	0.022048	3.95	-4.58	3.34	SKA1	spindle and kinetochore associated complex subunit 1
202376_at	0.721	0.02205	-3.95	-4.58	-3.74	SERPINA3	serpin family A member 3
1560372_at	0.721	0.022053	-3.95	-4.58	-3.5	LOC101929713	uncharacterized LOC101929713
224022_x_at	0.721	0.022058	-3.95	-4.58	-4.59	WNT16	Wnt family member 16
231517_at	0.721	0.022061	3.95	-4.58	5.49	ZYG11A	zyg-11 family member A, cell cycle regulator
241802_x_at	0.721	0.022073	3.95	-4.58	3.28	GRM2	glutamate metabotropic receptor 2
240129_at	0.721	0.022091	3.94	-4.58	3.27
205803_s_at	0.721	0.022105	-3.94	-4.58	-3.48	TRPC1	transient receptor potential cation channel subfamily C member 1
1561469_at	0.721	0.022109	3.94	-4.58	3.31	LOC101928865	uncharacterized LOC101928865
232276_at	0.721	0.022114	-3.94	-4.58	-3.61	HS6ST3	heparan sulfate 6-O-sulfotransferase 3
205724_at	0.721	0.022115	3.94	-4.58	3.42	PKP1	plakophilin 1
1554398_at	0.721	0.02215	-3.94	-4.58	-3.28	LYG2	lysozyme g2
207931_s_at	0.721	0.022153	-3.94	-4.58	-4.12	PFKFB2	6-phosphofructo-2-kinase/fructose-2,6-biphosphatase 2
1566832_at	0.721	0.022161	3.94	-4.58	3.36	TOP1P2	topoisomerase (DNA) I pseudogene 2
215321_at	0.721	0.022173	-3.94	-4.58	-3.27	RUNDC3B	RUN domain containing 3B
204230_s_at	0.721	0.022179	3.94	-4.58	3.99	SLC17A7	solute carrier family 17 member 7
243039_at	0.721	0.022222	3.94	-4.58	3.59
216407_at	0.721	0.022227	3.94	-4.58	4.2	VAC14	Vac14, PIKFYVE complex component
1559755_at	0.721	0.022232	3.94	-4.58	3.86	C21orf62-AS1	C21orf62 antisense RNA 1
1564368_a_at	0.721	0.02225	-3.93	-4.58	-3.29
243977_at	0.721	0.022251	3.93	-4.58	4.65	LOC541472	uncharacterized LOC541472
222172_at	0.721	0.022271	-3.93	-4.58	-3.26	NPAS3	neuronal PAS domain protein 3
232779_at	0.721	0.022281	3.93	-4.58	3.91
230460_at	0.721	0.022307	-3.93	-4.58	-3.26	MYLK-AS1	MYLK antisense RNA 1
219995_s_at	0.721	0.022318	3.93	-4.58	3.6	ZNF750	zinc finger protein 750
239723_at	0.721	0.022323	-3.93	-4.58	-3.26
227662_at	0.721	0.022331	-3.93	-4.58	-5.73	SYNPO2	synaptopodin 2
231841_s_at	0.721	0.02234	-3.93	-4.58	-5.09	KIAA1462	KIAA1462
234046_at	0.721	0.022363	3.93	-4.58	3.26
1561216_at	0.721	0.022372	-3.93	-4.58	-3.25	LOC101928961	uncharacterized LOC101928961
1556962_at	0.721	0.022383	3.93	-4.58	3.6
232278_s_at	0.721	0.022383	3.93	-4.58	3.27	DEPDC1	DEP domain containing 1
237394_at	0.721	0.022391	-3.93	-4.58	-3.29
236792_at	0.721	0.022399	3.93	-4.58	3.72	CFL1	cofilin 1
232154_at	0.721	0.022441	-3.92	-4.58	-3.63	ADM5	adrenomedullin 5 (putative)
216286_at	0.721	0.022443	3.92	-4.58	3.51
222953_at	0.721	0.022479	3.92	-4.58	4.04	GPR83	G protein-coupled receptor 83
1559928_at	0.721	0.022493	3.92	-4.58	3.25	PAPPA	pappalysin 1
244874_at	0.721	0.022511	3.92	-4.58	4.5	CHST15	carbohydrate (N-acetylgalactosamine 4-sulfate 6-O) sulfotransferase 15
208215_x_at	0.721	0.022517	3.92	-4.58	3.26	DRD4	dopamine receptor D4
214677_x_at	0.721	0.02252	-3.92	-4.58	-5.24	IGLC1	immunoglobulin lambda constant 1
237433_at	0.721	0.022531	3.92	-4.58	3.29
217004_s_at	0.721	0.022541	3.92	-4.58	3.51	MCF2	MCF.2 cell line derived transforming sequence
216201_at	0.721	0.022548	3.92	-4.58	3.41
1557014_a_at	0.721	0.02256	-3.92	-4.58	-3.61	FAM201A	family with sequence similarity 201 member A
204894_s_at	0.721	0.022569	-3.92	-4.58	-3.25	AOC3	amine oxidase, copper containing 3
233368_s_at	0.721	0.022572	-3.92	-4.58	-3.25	DNAJC27	DnaJ heat shock protein family (Hsp40) member C27
207166_at	0.721	0.022581	3.92	-4.58	3.29	GNGT1	G protein subunit gamma transducin 1
239214_at	0.721	0.022586	3.91	-4.58	3.6	LOC100130458	uncharacterized LOC100130458
231335_at	0.721	0.022586	-3.91	-4.58	-3.34	MS4A6E	membrane spanning 4-domains A6E
1563821_at	0.721	0.022589	3.91	-4.58	3.45	LINC00858	long intergenic non-protein coding RNA 858
214999_s_at	0.721	0.02259	-3.91	-4.58	-3.63	RAB11FIP3	RAB11 family interacting protein 3
229620_at	0.721	0.022591	-3.91	-4.58	-3.26	SEPP1	selenoprotein P, plasma, 1
235710_at	0.721	0.022602	3.91	-4.58	3.33	VPS53	VPS53, GARP complex subunit
1564887_at	0.721	0.022629	3.91	-4.58	3.85
1563103_at	0.721	0.022633	3.91	-4.58	3.46	PLCE1-AS2	PLCE1 antisense RNA 2
219738_s_at	0.721	0.022642	-3.91	-4.58	-4.09	PCDH9	protocadherin 9
1554038_at	0.721	0.022647	3.91	-4.58	4	LARP1B	La ribonucleoprotein domain family member 1B
225423_x_at	0.721	0.02265	-3.91	-4.58	-3.24	MRPL41	mitochondrial ribosomal protein L41
1566839_at	0.721	0.022656	3.91	-4.58	3.57	LOC283674	uncharacterized LOC283674
234686_at	0.721	0.022657	-3.91	-4.58	-3.63	SUGT1P1	SGT1 homolog, MIS12 kinetochore complex assembly cochaperone pseudogene 1
1555623_at	0.721	0.022662	-3.91	-4.58	-3.36
210030_at	0.721	0.022673	-3.91	-4.58	-3.31	DOHH	deoxyhypusine hydroxylase/monooxygenase
211162_x_at	0.721	0.022677	3.91	-4.58	4.49	SCD	stearoyl-CoA desaturase
1560174_at	0.721	0.022679	-3.91	-4.58	-4.26	SPAG16	sperm associated antigen 16
1554910_at	0.721	0.022688	3.91	-4.58	3.41	PRKD3	protein kinase D3
222124_at	0.721	0.022693	3.91	-4.58	3.66	HIF3A	hypoxia inducible factor 3 alpha subunit
1557698_at	0.721	0.022702	3.91	-4.58	3.42
231048_at	0.721	0.022703	-3.91	-4.58	-3.58
242288_s_at	0.721	0.022703	3.91	-4.58	3.26	EMILIN2	elastin microfibril interfacer 2
215448_at	0.721	0.022727	-3.91	-4.58	-3.24
244866_at	0.721	0.022752	3.91	-4.58	3.59
210614_at	0.721	0.022762	3.9	-4.58	3.47	TTPA	alpha tocopherol transfer protein
206210_s_at	0.721	0.022764	-3.9	-4.58	-3.89	CETP	cholesteryl ester transfer protein
1559188_x_at	0.721	0.02284	3.9	-4.58	3.37	PRKXP1	protein kinase, X-linked, pseudogene 1
205146_x_at	0.721	0.022854	3.9	-4.58	3.25	APBA3	amyloid beta precursor protein binding family A member 3
240988_x_at	0.721	0.022858	-3.9	-4.58	-3.39
244173_at	0.721	0.022862	-3.9	-4.58	-3.34	MIS18BP1	MIS18 binding protein 1
1562910_at	0.721	0.022874	3.9	-4.58	3.23	SH3PXD2B	SH3 and PX domains 2B
242441_at	0.721	0.022878	-3.9	-4.58	-3.25
243473_at	0.721	0.02288	3.9	-4.58	4.51
226129_at	0.721	0.02288	3.9	-4.58	3.35	FAM83H	family with sequence similarity 83 member H
211522_s_at	0.721	0.022891	-3.9	-4.58	-5.08	GNRHR	gonadotropin releasing hormone receptor
230864_at	0.721	0.022892	3.9	-4.58	3.28	NIM1K	NIM1 serine/threonine protein kinase
214610_at	0.721	0.022894	-3.9	-4.58	-3.33	CYP11B1	cytochrome P450 family 11 subfamily B member 1
229197_at	0.721	0.022898	3.9	-4.58	3.8	ING5	inhibitor of growth family member 5
1555319_at	0.721	0.02293	3.89	-4.58	3.33	STAB1	stabilin 1
1570099_at	0.721	0.022936	3.89	-4.58	3.71
242206_at	0.721	0.022936	-3.89	-4.58	-3.46
232971_at	0.721	0.02294	-3.89	-4.58	-3.42	RBM15	RNA binding motif protein 15
244831_at	0.721	0.022941	3.89	-4.58	4.06
205654_at	0.721	0.022946	-3.89	-4.58	-3.56	C4BPA	complement component 4 binding protein alpha
1558603_at	0.721	0.022949	-3.89	-4.58	-3.47	PLGLB2	plasminogen-like B2
239972_at	0.721	0.022953	-3.89	-4.58	-3.56
1570295_at	0.721	0.022968	3.89	-4.58	3.28
213451_x_at	0.721	0.022994	-3.89	-4.58	-5.82	TNXB///TNXA	tenascin XB///tenascin XA (pseudogene)
238052_at	0.721	0.022995	3.89	-4.58	3.35
242392_at	0.721	0.023	3.89	-4.58	3.31	UBE2U	ubiquitin conjugating enzyme E2 U (putative)
207926_at	0.721	0.023001	-3.89	-4.58	-3.31	GP5	glycoprotein V platelet
212849_at	0.721	0.023004	3.89	-4.58	4.05	AXIN1	axin 1
234437_at	0.721	0.023008	3.89	-4.58	3.73
239694_at	0.721	0.023022	3.89	-4.58	3.22	TRIM7	tripartite motif containing 7
1561112_at	0.721	0.023059	-3.89	-4.58	-4.31
1555587_at	0.721	0.023059	-3.89	-4.58	-3.29	PDZRN3	PDZ domain containing ring finger 3
91920_at	0.721	0.023067	3.89	-4.58	3.23	BCAN	brevican
216568_x_at	0.721	0.023132	3.88	-4.58	3.24
209374_s_at	0.721	0.02315	-3.88	-4.58	-3.26	IGHM	immunoglobulin heavy constant mu
1556322_a_at	0.721	0.023162	3.88	-4.58	3.76
209016_s_at	0.721	0.023169	3.88	-4.58	3.63	KRT7	keratin 7
220705_s_at	0.721	0.023181	3.88	-4.58	3.98	ADAMTS7	ADAM metallopeptidase with thrombospondin type 1 motif 7
234100_at	0.721	0.023184	3.88	-4.58	3.7
206268_at	0.721	0.023193	3.88	-4.58	3.23	LEFTY1	left-right determination factor 1
217307_at	0.721	0.023219	3.88	-4.58	3.76	ACO2	aconitase 2
238305_at	0.721	0.023241	-3.88	-4.58	-3.25
220660_at	0.721	0.023272	-3.88	-4.58	-3.52	LINC00474	long intergenic non-protein coding RNA 474
211238_at	0.721	0.023273	3.88	-4.58	3.36	ADAM7	ADAM metallopeptidase domain 7
243373_at	0.721	0.023298	-3.87	-4.58	-3.22
1569971_at	0.721	0.023302	3.87	-4.58	3.74	LOC100288721	uncharacterized LOC100288721
1569693_at	0.721	0.02332	-3.87	-4.58	-3.85	BTBD8	BTB domain containing 8
244159_at	0.721	0.023329	3.87	-4.58	3.22
220133_at	0.721	0.023374	3.87	-4.58	3.57	ODAM	odontogenic, ameloblast asssociated
221993_s_at	0.721	0.023377	-3.87	-4.58	-3.42	TSR3	TSR3, acp transferase ribosome maturation factor
241255_at	0.721	0.0234	-3.87	-4.58	-3.32	CTNNA3	catenin alpha 3
236142_at	0.721	0.02343	3.87	-4.58	3.21	PPIH	peptidylprolyl isomerase H
1560762_at	0.721	0.023437	-3.87	-4.58	-3.53	LINC00996	long intergenic non-protein coding RNA 996
1552834_at	0.721	0.023438	3.87	-4.58	3.22	B3GNT6	UDP-GlcNAc:betaGal beta-1,3-N-acetylglucosaminyltransferase 6
208176_at	0.721	0.023442	3.87	-4.58	3.62	DUX1	double homeobox 1
1561329_s_at	0.721	0.023445	-3.87	-4.58	-3.23	RPUSD3	RNA pseudouridylate synthase domain containing 3
1557436_at	0.721	0.023446	3.87	-4.58	3.37	XKR6	XK related 6
221288_at	0.721	0.023452	-3.87	-4.58	-5.17	GPR22	G protein-coupled receptor 22
220108_at	0.721	0.023458	-3.86	-4.58	-3.34	GNA14	G protein subunit alpha 14
227174_at	0.721	0.023459	-3.86	-4.58	-5.28	WDR72	WD repeat domain 72
239847_at	0.721	0.02346	-3.86	-4.58	-3.27
222961_at	0.721	0.02349	3.86	-4.58	3.45	SERINC2	serine incorporator 2
234760_at	0.721	0.023503	3.86	-4.58	3.58	OR2H4P	olfactory receptor family 2 subfamily H member 4 pseudogene
233650_at	0.721	0.023505	3.86	-4.58	3.23	CEP63	centrosomal protein 63
1566277_at	0.721	0.023511	-3.86	-4.58	-3.23	OR5E1P	olfactory receptor family 5 subfamily E member 1 pseudogene
1559310_at	0.721	0.023521	-3.86	-4.58	-3.43
226138_s_at	0.721	0.02354	3.86	-4.58	3.4
207406_at	0.721	0.02354	-3.86	-4.58	-3.51	CYP7A1	cytochrome P450 family 7 subfamily A member 1
214541_s_at	0.721	0.023547	3.86	-4.58	5.13	QKI	QKI, KH domain containing RNA binding
209735_at	0.721	0.023551	-3.86	-4.58	-3.41	ABCG2	ATP binding cassette subfamily G member 2 (Junior blood group)
1561236_at	0.721	0.023551	-3.86	-4.58	-3.44
232308_at	0.721	0.023566	3.86	-4.58	3.24	TTC21A	tetratricopeptide repeat domain 21A
1557776_at	0.721	0.023569	3.86	-4.58	3.21	LOC101928303	uncharacterized LOC101928303
236654_s_at	0.721	0.023589	3.86	-4.58	4.54
215078_at	0.721	0.023591	3.86	-4.58	3.68	LOC100129518///SOD2	uncharacterized LOC100129518///superoxide dismutase 2, mitochondrial
228233_at	0.721	0.023594	-3.86	-4.58	-5.11	FREM1	FRAS1 related extracellular matrix 1
1557720_s_at	0.721	0.023599	3.86	-4.58	3.41	MYO16	myosin XVI
234166_at	0.721	0.023605	3.86	-4.58	3.22	UBE3A	ubiquitin protein ligase E3A
1559274_at	0.721	0.02362	3.86	-4.58	3.24	ZNF732	zinc finger protein 732
1553627_s_at	0.721	0.023627	3.86	-4.58	4.57	EFCAB13	EF-hand calcium binding domain 13
223333_s_at	0.721	0.023629	3.86	-4.58	5.22	ANGPTL4	angiopoietin like 4
230595_at	0.721	0.023634	-3.85	-4.58	-5.62	PGM5-AS1	PGM5 antisense RNA 1
223633_s_at	0.721	0.023641	-3.85	-4.58	-3.29
1552689_at	0.721	0.023642	3.85	-4.58	3.3	CASKIN1	CASK interacting protein 1
210262_at	0.721	0.023645	-3.85	-4.58	-3.86	CRISP2	cysteine rich secretory protein 2
214896_at	0.721	0.023655	3.85	-4.58	4.31	LINC01314	long intergenic non-protein coding RNA 1314
204475_at	0.721	0.02367	3.85	-4.58	4.19	MMP1	matrix metallopeptidase 1
237690_at	0.721	0.023676	3.85	-4.58	4.85	ADGRF4	adhesion G protein-coupled receptor F4
216688_at	0.721	0.023678	3.85	-4.58	3.25
210673_x_at	0.721	0.023683	3.85	-4.58	3.2	NKX2-1	NK2 homeobox 1
244482_at	0.721	0.023686	-3.85	-4.58	-5.03
220272_at	0.721	0.023692	-3.85	-4.58	-4.02	BNC2	basonuclin 2
211006_s_at	0.721	0.023697	-3.85	-4.58	-3.2	KCNB1	potassium voltage-gated channel subfamily B member 1
234839_at	0.721	0.023731	3.85	-4.58	3.19
230010_at	0.721	0.023735	-3.85	-4.58	-3.19	SRRM4	serine/arginine repetitive matrix 4
204695_at	0.721	0.023735	3.85	-4.58	3.57	CDC25A	cell division cycle 25A
1562677_at	0.721	0.023766	3.85	-4.58	3.45
1562997_a_at	0.721	0.023768	3.85	-4.58	4.98	LOC105374042	uncharacterized LOC105374042
239150_at	0.721	0.023771	-3.85	-4.58	-3.26	SNTN	sentan, cilia apical structure protein
227088_at	0.721	0.023778	-3.85	-4.58	-4.19	PDE5A	phosphodiesterase 5A
1570071_at	0.721	0.02379	3.85	-4.58	3.46	LOC101930243///LOC101929865	uncharacterized LOC101930243///uncharacterized LOC101929865
202992_at	0.721	0.023798	-3.85	-4.58	-5.59	C7	complement component 7
222068_s_at	0.721	0.023806	3.85	-4.58	3.28	DNAAF1	dynein axonemal assembly factor 1
1563553_at	0.721	0.02382	3.84	-4.58	3.19
231779_at	0.721	0.023839	3.84	-4.58	3.46	IRAK2	interleukin 1 receptor associated kinase 2
1554418_s_at	0.721	0.023845	-3.84	-4.58	-3.77	SPOCK3	sparc/osteonectin, cwcv and kazal-like domains proteoglycan (testican) 3
231154_x_at	0.721	0.023853	-3.84	-4.58	-3.35	TINAG	tubulointerstitial nephritis antigen
232027_at	0.721	0.023868	-3.84	-4.58	-4.34	SYNE1	spectrin repeat containing nuclear envelope protein 1
244790_at	0.721	0.023869	3.84	-4.58	3.22	MTCP1	mature T-cell proliferation 1
208563_x_at	0.721	0.023871	-3.84	-4.58	-3.59	POU3F3	POU class 3 homeobox 3
1563559_at	0.721	0.023876	-3.84	-4.58	-3.58	FMN1	formin 1
237171_at	0.721	0.023934	3.84	-4.58	3.29
210121_at	0.721	0.02396	-3.84	-4.58	-3.18	B3GALT2	beta-1,3-galactosyltransferase 2
1555603_at	0.721	0.023993	3.84	-4.58	3.85	BAGE	B melanoma antigen
208391_s_at	0.721	0.023996	3.83	-4.58	3.35	GLP1R	glucagon like peptide 1 receptor
229837_s_at	0.721	0.024013	3.83	-4.58	3.45	KCTD5	potassium channel tetramerization domain containing 5
215912_at	0.721	0.024016	-3.83	-4.58	-3.18	GNAO1	G protein subunit alpha o1
244125_at	0.721	0.024017	-3.83	-4.58	-4.72
216069_at	0.721	0.02402	3.83	-4.58	4.86	PRMT2	protein arginine methyltransferase 2
224134_at	0.721	0.024023	3.83	-4.58	3.18	MGC10814	uncharacterized protein MGC10814
1560832_at	0.721	0.024028	-3.83	-4.58	-3.36	LINC01029	long intergenic non-protein coding RNA 1029
238592_at	0.721	0.024036	-3.83	-4.58	-3.73
232603_at	0.721	0.024044	3.83	-4.58	3.5	DCDC5///DCDC1	doublecortin domain containing 5///doublecortin domain containing 1
222267_at	0.721	0.024047	3.83	-4.58	3.23	TMEM209	transmembrane protein 209
1566772_at	0.721	0.024052	3.83	-4.58	3.46
239687_at	0.721	0.024063	3.83	-4.58	3.52	SLX4	SLX4 structure-specific endonuclease subunit
239852_at	0.721	0.024068	3.83	-4.58	3.19	MMAA	methylmalonic aciduria (cobalamin deficiency) cblA type
215198_s_at	0.721	0.024068	-3.83	-4.58	-3.62	CALD1	caldesmon 1
201890_at	0.721	0.024069	3.83	-4.58	3.18	RRM2	ribonucleotide reductase regulatory subunit M2
216298_at	0.721	0.024091	3.83	-4.58	5.24	TARP	TCR gamma alternate reading frame protein
216273_at	0.721	0.024099	3.83	-4.58	3.79	ZNF460	zinc finger protein 460
1563226_at	0.721	0.024124	-3.83	-4.58	-3.39	SLC38A10	solute carrier family 38 member 10
207432_at	0.721	0.024129	3.83	-4.58	3.17	BEST2	bestrophin 2
1569779_at	0.721	0.024133	-3.83	-4.58	-3.18	LINC01149	long intergenic non-protein coding RNA 1149
AFFX-HUMISGF3A/M97935_5_at	0.721	0.02414	3.83	-4.58	3.17	STAT1	signal transducer and activator of transcription 1
215264_at	0.721	0.024152	-3.83	-4.58	-3.23	EMX1	empty spiracles homeobox 1
211900_x_at	0.721	0.024154	3.83	-4.58	3.2	CD6	CD6 molecule
1566673_at	0.721	0.024172	3.83	-4.58	4.94
1564356_at	0.721	0.024174	-3.83	-4.58	-3.34	ZNF568	zinc finger protein 568
1557826_at	0.721	0.0242	3.82	-4.58	4.76	LINC01252	long intergenic non-protein coding RNA 1252
237513_at	0.721	0.024213	3.82	-4.58	3.66	PRSS58	protease, serine 58
238215_at	0.721	0.024214	3.82	-4.58	3.38	SLC6A18	solute carrier family 6 member 18
211414_at	0.721	0.024216	3.82	-4.58	3.27	GLS	glutaminase
232462_s_at	0.721	0.024232	3.82	-4.58	3.27	A1BG-AS1	A1BG antisense RNA 1
243380_at	0.721	0.024233	3.82	-4.58	3.3
1570355_a_at	0.721	0.024236	-3.82	-4.58	-3.63	DPY19L1	dpy-19 like 1
244144_at	0.721	0.024238	-3.82	-4.58	-3.66	SYNE1	spectrin repeat containing nuclear envelope protein 1
214883_at	0.721	0.024272	-3.82	-4.58	-3.18	THRA	thyroid hormone receptor, alpha
1557811_a_at	0.721	0.024289	-3.82	-4.58	-4.37
230125_at	0.721	0.024299	3.82	-4.58	3.24	GUSB	glucuronidase beta
211155_s_at	0.721	0.024306	-3.82	-4.58	-3.51	THPO	thrombopoietin
1561307_at	0.721	0.024341	-3.82	-4.58	-3.6	LOC105372550	uncharacterized LOC105372550
1563097_at	0.721	0.024371	3.81	-4.58	3.17	DNAH12	dynein axonemal heavy chain 12
242302_at	0.721	0.024379	-3.81	-4.58	-3.35	PDS5B	PDS5 cohesin associated factor B
229172_at	0.721	0.024382	-3.81	-4.58	-3.29	HSPA12B	heat shock protein family A (Hsp70) member 12B
211436_at	0.721	0.024402	3.81	-4.58	3.32
207746_at	0.721	0.024409	3.81	-4.58	3.96	POLQ	DNA polymerase theta
1563454_at	0.721	0.024414	-3.81	-4.58	-3.31	SOX6	SRY-box 6
214563_at	0.721	0.024429	3.81	-4.58	3.4	PCDHGC3	protocadherin gamma subfamily C, 3
208257_x_at	0.721	0.024431	-3.81	-4.58	-3.24	PSG1	pregnancy specific beta-1-glycoprotein 1
1560960_at	0.721	0.024437	-3.81	-4.58	-3.78
1553672_at	0.721	0.024441	3.81	-4.58	4.53	ENAH	enabled homolog (Drosophila)
209800_at	0.721	0.024452	3.81	-4.58	4.05	KRT16	keratin 16
234277_at	0.721	0.02449	3.81	-4.58	3.26
230670_at	0.721	0.024534	-3.81	-4.58	-3.49	IGSF10	immunoglobulin superfamily member 10
1566527_at	0.721	0.024538	-3.81	-4.58	-4.36
201402_at	0.721	0.024545	3.81	-4.58	3.54	GRK2	G protein-coupled receptor kinase 2
228989_at	0.721	0.024545	3.81	-4.58	3.82	TYMSOS	TYMS opposite strand
206250_x_at	0.721	0.024566	3.8	-4.58	3.19	AVPR1A	arginine vasopressin receptor 1A
235503_at	0.721	0.024569	-3.8	-4.58	-3.39	ASB5	ankyrin repeat and SOCS box containing 5
238916_at	0.721	0.024575	-3.8	-4.58	-3.29	LINC00938	long intergenic non-protein coding RNA 938
226516_at	0.721	0.02458	3.8	-4.58	3.21	MFSD12	major facilitator superfamily domain containing 12
229612_at	0.721	0.024582	-3.8	-4.58	-3.29
221126_at	0.721	0.024631	-3.8	-4.58	-3.17	DKK3	dickkopf WNT signaling pathway inhibitor 3
37004_at	0.721	0.024631	3.8	-4.58	3.21	SFTPB	surfactant protein B
226573_at	0.721	0.024638	-3.8	-4.58	-3.15	DIRAS1	DIRAS family GTPase 1
231606_at	0.721	0.02466	-3.8	-4.58	-3.71	CDX2	caudal type homeobox 2
206295_at	0.721	0.024661	3.8	-4.58	4.42	IL18	interleukin 18
204444_at	0.721	0.024665	3.8	-4.58	3.3	KIF11	kinesin family member 11
242043_s_at	0.721	0.024693	3.8	-4.58	3.21
1559363_at	0.721	0.024694	-3.8	-4.58	-4.39	LINC01146	long intergenic non-protein coding RNA 1146
215351_at	0.721	0.024697	3.8	-4.58	3.97	RTCA	RNA 3'-terminal phosphate cyclase
218015_s_at	0.721	0.024705	-3.8	-4.58	-3.18	WRNIP1	Werner helicase interacting protein 1
1564233_at	0.721	0.024719	3.8	-4.58	3.52	FLJ33534	uncharacterized LOC285150
233657_at	0.721	0.024743	3.79	-4.58	3.15	OPN5	opsin 5
240103_at	0.721	0.024751	3.79	-4.58	4.72
241535_at	0.721	0.024774	-3.79	-4.58	-6.33	LOC101060391	uncharacterized LOC101060391
217073_x_at	0.721	0.024774	-3.79	-4.58	-3.22	APOA1	apolipoprotein A1
228715_at	0.721	0.024789	-3.79	-4.58	-4.29	ZCCHC12	zinc finger CCHC-type containing 12
236060_at	0.721	0.024792	3.79	-4.58	3.19	METTL14	methyltransferase like 14
210937_s_at	0.721	0.024815	-3.79	-4.58	-3.16	PDX1	pancreatic and duodenal homeobox 1
217386_at	0.721	0.024821	3.79	-4.58	3.61
224404_s_at	0.721	0.024822	-3.79	-4.58	-3.29	FCRL5	Fc receptor like 5
240075_at	0.721	0.024822	-3.79	-4.58	-3.24	LOC101927417	uncharacterized LOC101927417
240946_at	0.721	0.024828	-3.79	-4.58	-3.27
228872_at	0.721	0.02483	-3.79	-4.58	-3.51	ABHD17B	abhydrolase domain containing 17B
1558020_at	0.721	0.024839	-3.79	-4.58	-3.42	ERGIC3	ERGIC and golgi 3
210234_at	0.721	0.024849	3.79	-4.58	3.33	GRM4	glutamate metabotropic receptor 4
211856_x_at	0.721	0.024852	3.79	-4.58	3.15	CD28	CD28 molecule
211107_s_at	0.721	0.024873	3.79	-4.58	3.54	AURKC	aurora kinase C
1565611_at	0.721	0.024874	3.79	-4.58	3.26	DYNLRB1	dynein light chain roadblock-type 1
205220_at	0.721	0.024882	3.79	-4.58	4.13	HCAR3	hydroxycarboxylic acid receptor 3
1566176_at	0.721	0.024887	-3.79	-4.58	-3.27	CLYBL-AS1	CLYBL antisense RNA 1
215039_at	0.721	0.02489	-3.79	-4.58	-3.28	LINC01140	long intergenic non-protein coding RNA 1140
242204_at	0.721	0.024903	3.79	-4.58	4.49	WFDC5	WAP four-disulfide core domain 5
242660_at	0.721	0.024918	-3.79	-4.58	-3.17	MALRD1	MAM and LDL receptor class A domain containing 1
237279_at	0.721	0.024951	3.78	-4.58	3.22
1561519_at	0.721	0.024959	-3.78	-4.58	-3.23	LOC101927346	uncharacterized LOC101927346
1553196_a_at	0.721	0.024964	-3.78	-4.58	-3.14	FCRL3	Fc receptor like 3
219139_s_at	0.721	0.024978	-3.78	-4.58	-3.14	CROCCP3	ciliary rootlet coiled-coil, rootletin pseudogene 3
206466_at	0.721	0.02498	3.78	-4.58	3.31	ACSBG1	acyl-CoA synthetase bubblegum family member 1
238247_at	0.721	0.024981	3.78	-4.58	3.13	TMC3-AS1	TMC3 antisense RNA 1
225895_at	0.721	0.024994	-3.78	-4.58	-4.58	SYNPO2	synaptopodin 2
243905_at	0.721	0.025002	-3.78	-4.58	-3.35	LINC00944	long intergenic non-protein coding RNA 944
239445_at	0.721	0.02501	3.78	-4.58	4.14
204731_at	0.721	0.025018	-3.78	-4.58	-3.53	TGFBR3	transforming growth factor beta receptor 3
1570121_at	0.721	0.025044	-3.78	-4.58	-3.7	ZNF365	zinc finger protein 365
237306_at	0.721	0.02506	-3.78	-4.58	-3.13	ZNF829	zinc finger protein 829
1560237_at	0.721	0.025083	-3.78	-4.58	-3.88
1557637_at	0.721	0.025093	3.78	-4.58	3.26
208170_s_at	0.721	0.025104	-3.78	-4.58	-3.32	TRIM31	tripartite motif containing 31
240495_at	0.721	0.025118	3.78	-4.58	3.14
1552694_at	0.721	0.025125	-3.77	-4.58	-4.16	SLC2A13	solute carrier family 2 member 13
232320_at	0.721	0.025126	3.77	-4.58	3.52	KIAA1614-AS1	KIAA1614 antisense RNA 1
220463_at	0.721	0.025138	3.77	-4.58	3.13	TRPM3	transient receptor potential cation channel subfamily M member 3
227469_at	0.721	0.025157	3.77	-4.58	3.95
1555868_at	0.721	0.025161	3.77	-4.58	3.31	LOC100507477	uncharacterized LOC100507477
243543_at	0.721	0.025179	3.77	-4.58	3.14
233036_at	0.721	0.025181	-3.77	-4.58	-3.19
205318_at	0.721	0.025186	-3.77	-4.58	-3.36	KIF5A	kinesin family member 5A
231429_at	0.721	0.025193	3.77	-4.58	3.13	TRABD2A	TraB domain containing 2A
207795_s_at	0.721	0.0252	3.77	-4.58	3.21	KLRD1	killer cell lectin like receptor D1
1570242_x_at	0.721	0.0252	-3.77	-4.58	-3.95	SPATA21	spermatogenesis associated 21
216074_x_at	0.721	0.025214	3.77	-4.58	3.43	WWC1	WW and C2 domain containing 1
1552299_at	0.721	0.025222	-3.77	-4.58	-3.15	AK9	adenylate kinase 9
244316_at	0.721	0.025223	-3.77	-4.58	-3.43	C17orf98	chromosome 17 open reading frame 98
1560181_at	0.721	0.025225	3.77	-4.58	3.24	LDLRAD4-AS1	LDLRAD4 antisense RNA 1
238232_at	0.721	0.025232	-3.77	-4.58	-3.77
1563127_at	0.721	0.025232	-3.77	-4.58	-3.49	LINC01428	long intergenic non-protein coding RNA 1428
207593_at	0.721	0.025233	3.77	-4.58	3.33	ABCG4	ATP binding cassette subfamily G member 4
238238_at	0.721	0.025251	3.77	-4.58	3.35
239039_at	0.721	0.025293	-3.77	-4.58	-3.13
244558_at	0.721	0.025298	3.77	-4.58	3.14
1569402_at	0.721	0.025325	-3.76	-4.58	-4.08	MEIS3	Meis homeobox 3
215417_at	0.721	0.025345	3.76	-4.58	3.14	EXOC6B	exocyst complex component 6B
230453_s_at	0.721	0.025347	-3.76	-4.58	-3.12	ATP2A3	ATPase sarcoplasmic/endoplasmic reticulum Ca2+ transporting 3
216653_at	0.721	0.025353	3.76	-4.58	4.45	DR1	down-regulator of transcription 1
206339_at	0.721	0.025359	3.76	-4.58	3.21	CARTPT	CART prepropeptide
231040_at	0.721	0.025376	-3.76	-4.58	-5.21	RORB	RAR related orphan receptor B
241184_x_at	0.721	0.02539	3.76	-4.58	3.44
221149_at	0.721	0.025403	3.76	-4.58	3.14	C5AR2	complement component 5a receptor 2
202274_at	0.721	0.025436	-3.76	-4.58	-5.17	ACTG2	actin, gamma 2, smooth muscle, enteric
243481_at	0.721	0.025445	-3.76	-4.58	-3.64	RHOJ	ras homolog family member J
209160_at	0.721	0.025447	-3.76	-4.58	-3.33	AKR1C3	aldo-keto reductase family 1, member C3
238659_at	0.721	0.02545	-3.76	-4.58	-3.5	KIAA0141	KIAA0141
242709_s_at	0.721	0.025478	-3.76	-4.58	-3.29
244353_s_at	0.721	0.025492	-3.76	-4.58	-3.17	SLC2A12	solute carrier family 2 member 12
221914_at	0.721	0.025506	3.76	-4.58	3.21	SYN1	synapsin I
242274_x_at	0.721	0.025525	-3.75	-4.58	-4.64	SLC25A42	solute carrier family 25 member 42
1553817_at	0.721	0.025564	3.75	-4.58	4	LOC102725315///LOC727983///POM121L10P///POM121L4P///POM121L8P///POM121L9P///POM121L1P	putative POM121-like protein 1-like///putative POM121-like protein 1-like///POM121 transmembrane nucleoporin like 10, pseudogene///POM121 transmembrane nucleoporin like 4, pseudogene///POM121 transmembrane nucleoporin like 8, pseudogene///POM121 transmembrane nucleoporin like 9, pseudogene///POM121 transmembrane nucleoporin like 1, pseudogene
1563178_at	0.721	0.025566	3.75	-4.58	3.39
206317_s_at	0.721	0.025566	3.75	-4.58	3.22	ABCB8	ATP binding cassette subfamily B member 8
234279_at	0.721	0.025573	-3.75	-4.58	-4.07	TNFAIP8L3	TNF alpha induced protein 8 like 3
206644_at	0.721	0.025579	3.75	-4.58	3.58	NR0B1	nuclear receptor subfamily 0 group B member 1
217563_at	0.721	0.025579	-3.75	-4.58	-3.14	CLOCK	clock circadian regulator
224040_at	0.721	0.025581	3.75	-4.58	3.63	TTTY5	testis-specific transcript, Y-linked 5 (non-protein coding)
241094_at	0.721	0.025595	3.75	-4.58	3.11
240439_at	0.721	0.025598	-3.75	-4.58	-3.73
243146_at	0.721	0.025599	3.75	-4.58	3.14
1563054_at	0.721	0.025619	-3.75	-4.58	-3.96
237139_at	0.721	0.025623	3.75	-4.58	3.31	PDE9A	phosphodiesterase 9A
231294_at	0.721	0.025644	-3.75	-4.58	-3.52
234816_at	0.721	0.025646	-3.75	-4.58	-3.38	LINC00521	long intergenic non-protein coding RNA 521
1553920_at	0.721	0.025649	-3.75	-4.58	-3.13	C9orf84	chromosome 9 open reading frame 84
221807_s_at	0.721	0.025651	3.75	-4.58	3.23	TRABD	TraB domain containing
237620_at	0.721	0.025674	-3.75	-4.58	-3.21	ODF3L2	outer dense fiber of sperm tails 3 like 2
1558821_s_at	0.721	0.025686	-3.75	-4.58	-3.19	LOC102723694	uncharacterized LOC102723694
220527_at	0.721	0.025698	-3.75	-4.58	-3.32	MRPL20	mitochondrial ribosomal protein L20
1557683_at	0.721	0.025699	3.75	-4.58	3.12
237168_at	0.721	0.025742	3.74	-4.58	4.32	NEK5	NIMA related kinase 5
221441_at	0.721	0.025752	-3.74	-4.58	-3.14	GSC2	goosecoid homeobox 2
227168_at	0.721	0.025759	-3.74	-4.58	-3.12	MIAT	myocardial infarction associated transcript (non-protein coding)
218662_s_at	0.721	0.025782	3.74	-4.58	3.13	NCAPG	non-SMC condensin I complex subunit G
206030_at	0.721	0.025783	-3.74	-4.58	-3.4	ASPA	aspartoacylase
243575_at	0.721	0.025783	-3.74	-4.58	-3.82	MAST4	microtubule associated serine/threonine kinase family member 4
1554671_a_at	0.721	0.02579	3.74	-4.58	3.22	SRRM2	serine/arginine repetitive matrix 2
234793_at	0.721	0.0258	-3.74	-4.58	-3.39
214490_at	0.721	0.025827	-3.74	-4.58	-3.11	ARSF	arylsulfatase F
1568785_a_at	0.721	0.025829	3.74	-4.58	3.1	LOC102725116	uncharacterized LOC102725116
239579_at	0.721	0.025863	3.74	-4.58	3.15	EPHX4	epoxide hydrolase 4
230217_at	0.721	0.025892	3.74	-4.58	3.16	CLVS1	clavesin 1
231448_at	0.721	0.025922	3.73	-4.58	3.1	ADAD1	adenosine deaminase domain containing 1
242478_at	0.721	0.025939	-3.73	-4.58	-3.27
239883_s_at	0.721	0.025951	-3.73	-4.58	-3.38	ANO4	anoctamin 4
229645_at	0.721	0.025992	-3.73	-4.58	-3.1	FAM69C	family with sequence similarity 69 member C
209617_s_at	0.721	0.025995	-3.73	-4.58	-3.44	CTNND2	catenin delta 2
1569262_x_at	0.721	0.025995	3.73	-4.58	3.29	UBE3D	ubiquitin protein ligase E3D
230237_at	0.721	0.025998	-3.73	-4.58	-8.2	ADCYAP1	adenylate cyclase activating polypeptide 1
242177_at	0.721	0.025998	3.73	-4.58	4.51
238861_at	0.721	0.026003	-3.73	-4.58	-3.26	SSBP2	single stranded DNA binding protein 2
1566880_at	0.721	0.026014	3.73	-4.58	3.24
215626_at	0.721	0.026032	-3.73	-4.58	-3.09
1560774_at	0.721	0.026042	3.73	-4.58	3.44
216925_s_at	0.721	0.026046	-3.73	-4.58	-3.66	TAL1	TAL bHLH transcription factor 1, erythroid differentiation factor
207137_at	0.721	0.026047	3.73	-4.58	3.67	TONSL	tonsoku-like, DNA repair protein
1570474_s_at	0.721	0.026058	-3.73	-4.58	-3.66	ANKRD30BP3	ankyrin repeat domain 30B pseudogene 3
242740_at	0.721	0.026082	3.73	-4.58	3.13
1564937_at	0.721	0.026142	-3.72	-4.58	-3.2
204442_x_at	0.721	0.026144	-3.72	-4.58	-3.89	LTBP4	latent transforming growth factor beta binding protein 4
239509_at	0.721	0.026163	-3.72	-4.58	-3.72	FLJ16779	uncharacterized LOC100192386
220886_at	0.721	0.026166	3.72	-4.58	3.09	GABRQ	gamma-aminobutyric acid type A receptor theta subunit
200660_at	0.721	0.026188	3.72	-4.58	3.29	S100A11	S100 calcium binding protein A11
211912_at	0.721	0.026207	-3.72	-4.58	-4.2	MERTK	MER proto-oncogene, tyrosine kinase
1554428_s_at	0.721	0.026223	3.72	-4.58	3.18	NLGN2	neuroligin 2
211606_at	0.721	0.026261	3.72	-4.58	3.52
234093_at	0.721	0.026276	3.72	-4.58	3.08	ZNF326	zinc finger protein 326
229719_s_at	0.721	0.02628	3.72	-4.58	3.25	DERL3	derlin 3
236761_at	0.721	0.026288	-3.72	-4.58	-3.08	LHFPL3	lipoma HMGIC fusion partner-like 3
243602_at	0.721	0.026344	-3.71	-4.58	-4.43	MGC40069	uncharacterized protein MGC40069
1560940_at	0.721	0.026358	-3.71	-4.58	-3.09	SACS-AS1	SACS antisense RNA 1
209591_s_at	0.721	0.026364	3.71	-4.58	3.25	BMP7	bone morphogenetic protein 7
211437_at	0.721	0.026376	-3.71	-4.58	-3.13
207451_at	0.721	0.026376	3.71	-4.58	3.36	NKX2-8	NK2 homeobox 8
241002_at	0.721	0.026389	-3.71	-4.58	-3.13
234652_at	0.721	0.026393	3.71	-4.58	3.11	LOC105376944	uncharacterized LOC105376944
237478_at	0.721	0.026404	3.71	-4.58	3.95	LOC399900	uncharacterized LOC399900
216744_at	0.721	0.026404	-3.71	-4.58	-3.19
230898_at	0.721	0.026405	3.71	-4.58	3.08
228207_at	0.721	0.02642	-3.71	-4.58	-4.07	LOC100499489	uncharacterized LOC100499489
235449_at	0.721	0.026452	3.71	-4.58	3.12	LRSAM1	leucine rich repeat and sterile alpha motif containing 1
239472_at	0.721	0.026462	-3.71	-4.58	-3.62	EHD4	EH domain containing 4
219645_at	0.721	0.026476	-3.71	-4.58	-3.3	CASQ1	calsequestrin 1
217055_x_at	0.721	0.026477	-3.71	-4.58	-3.1	SLC1A2	solute carrier family 1 member 2
214922_at	0.721	0.026478	-3.71	-4.58	-3.63	ZNF484	zinc finger protein 484
244259_s_at	0.721	0.02649	3.71	-4.58	3.21	ZNF91	zinc finger protein 91
244502_at	0.721	0.026493	3.71	-4.58	3.12
223629_at	0.721	0.026496	-3.71	-4.58	-3.62	PCDHB5	protocadherin beta 5
234078_at	0.721	0.026504	-3.71	-4.58	-3.09	ADAMTS9-AS2	ADAMTS9 antisense RNA 2
216572_at	0.721	0.026506	-3.71	-4.58	-3.86	FOXL1	forkhead box L1
220077_at	0.721	0.026507	3.71	-4.58	3.17	CCDC134	coiled-coil domain containing 134
225721_at	0.721	0.026548	-3.7	-4.58	-4.2	SYNPO2	synaptopodin 2
210299_s_at	0.721	0.026553	-3.7	-4.58	-3.08	FHL1	four and a half LIM domains 1
1566163_at	0.721	0.02657	-3.7	-4.58	-4.68
240785_at	0.721	0.026585	3.7	-4.58	3.57
240914_at	0.721	0.026586	-3.7	-4.58	-3.32
234932_s_at	0.721	0.026598	3.7	-4.58	3.65	CDCP1	CUB domain containing protein 1
239791_at	0.721	0.026603	3.7	-4.58	3.09	HOXB-AS3	HOXB cluster antisense RNA 3
1555740_a_at	0.721	0.026612	-3.7	-4.58	-4.17	MRAP	melanocortin 2 receptor accessory protein
201958_s_at	0.721	0.026618	-3.7	-4.58	-3.72	PPP1R12B	protein phosphatase 1 regulatory subunit 12B
217235_x_at	0.721	0.026625	-3.7	-4.58	-3.25	IGLL5	immunoglobulin lambda like polypeptide 5
1569681_at	0.721	0.026628	-3.7	-4.58	-3.15	LOC101929378	uncharacterized LOC101929378
236833_at	0.721	0.026632	-3.7	-4.58	-3.96	TTC16	tetratricopeptide repeat domain 16
222774_s_at	0.721	0.026655	3.7	-4.58	3.5	NETO2	neuropilin and tolloid like 2
214238_at	0.721	0.026662	-3.7	-4.58	-3.9	GDF7	growth differentiation factor 7
1555723_at	0.721	0.026679	-3.7	-4.58	-3.14
207302_at	0.721	0.0267	-3.7	-4.58	-4.36	SGCG	sarcoglycan gamma
242447_at	0.721	0.0267	-3.7	-4.58	-3.94	C3orf70	chromosome 3 open reading frame 70
229866_at	0.721	0.026711	-3.7	-4.58	-3.62	STK32A	serine/threonine kinase 32A
1559713_at	0.721	0.026714	3.7	-4.58	3.36
214768_x_at	0.721	0.026732	-3.7	-4.58	-3.91	IGKC	immunoglobulin kappa constant
1562093_at	0.721	0.026736	3.7	-4.58	3.2
207117_at	0.721	0.026747	3.69	-4.58	3.68	ZNF117	zinc finger protein 117
244449_at	0.721	0.026747	3.69	-4.58	3.41	LOC102723380	uncharacterized LOC102723380
206097_at	0.721	0.026747	3.69	-4.58	3.36	SLC22A18AS	solute carrier family 22 member 18 antisense
234844_at	0.721	0.026754	-3.69	-4.58	-4.03	ZNF407	zinc finger protein 407
231455_at	0.721	0.026762	3.69	-4.58	4.52	LINC00487	long intergenic non-protein coding RNA 487
216007_at	0.721	0.026766	3.69	-4.58	3.11
205112_at	0.721	0.026777	-3.69	-4.58	-3.8	PLCE1	phospholipase C epsilon 1
234478_at	0.721	0.026781	-3.69	-4.58	-3.79
1562776_at	0.721	0.026804	3.69	-4.58	3.49	LOC339807	uncharacterized LOC339807
212020_s_at	0.721	0.026804	3.69	-4.58	3.16	MKI67	marker of proliferation Ki-67
238674_at	0.721	0.026806	3.69	-4.58	3.08
1554876_a_at	0.721	0.02682	3.69	-4.58	3.09	S100Z	S100 calcium binding protein Z
214586_at	0.721	0.026825	-3.69	-4.58	-3.07	GPR37	G protein-coupled receptor 37
244601_at	0.721	0.026826	3.69	-4.58	4.36
222897_s_at	0.721	0.026829	-3.69	-4.58	-3.15	ZFP64	ZFP64 zinc finger protein
209590_at	0.721	0.026838	3.69	-4.58	3.17	BMP7	bone morphogenetic protein 7
1553568_a_at	0.721	0.026839	3.69	-4.58	3.68	HIST1H1T	histone cluster 1, H1t
1554994_at	0.721	0.026841	-3.69	-4.58	-3.73	RAG1	recombination activating gene 1
206428_s_at	0.721	0.026858	-3.69	-4.58	-3.08	ZNF143	zinc finger protein 143
1553666_at	0.721	0.02686	3.69	-4.58	3.45	CCDC34	coiled-coil domain containing 34
1563546_at	0.721	0.026874	3.69	-4.58	3.37
217325_at	0.721	0.026878	-3.69	-4.58	-3.06	KRT3	keratin 3
232950_s_at	0.721	0.02688	3.69	-4.58	3.12	PITPNM2	phosphatidylinositol transfer protein membrane associated 2
240408_at	0.721	0.026881	-3.69	-4.58	-3.11
218542_at	0.721	0.026917	3.69	-4.58	3.13	CEP55	centrosomal protein 55
240925_at	0.721	0.026925	3.69	-4.58	3.05
238566_at	0.721	0.026945	-3.69	-4.58	-3.66	ZNF334	zinc finger protein 334
228924_s_at	0.721	0.026951	3.68	-4.58	3.11	UBE2J1	ubiquitin conjugating enzyme E2 J1
242432_at	0.721	0.026952	-3.68	-4.58	-3.84	LRRC37A2	leucine rich repeat containing 37 member A2
1566526_at	0.721	0.026956	-3.68	-4.58	-3.17	LINC00927	long intergenic non-protein coding RNA 927
242109_at	0.721	0.026965	3.68	-4.58	4.67
218499_at	0.721	0.026983	-3.68	-4.58	-3.06	STK26	serine/threonine protein kinase 26
1558484_s_at	0.721	0.026989	3.68	-4.58	3.97	LRRC27	leucine rich repeat containing 27
220340_at	0.721	0.026991	3.68	-4.58	4.1	GREB1L	growth regulation by estrogen in breast cancer 1 like
1562579_at	0.721	0.026996	-3.68	-4.58	-3.3
239574_at	0.721	0.027017	-3.68	-4.58	-3.57
234764_x_at	0.721	0.027017	-3.68	-4.58	-4.82	IGLJ3///IGLV1-44///CKAP2///IGLV@///IGLC1	immunoglobulin lambda joining 3///immunoglobulin lambda variable 1-44///cytoskeleton associated protein 2///immunoglobulin lambda variable cluster///immunoglobulin lambda constant 1
224527_at	0.721	0.027036	3.68	-4.58	3.07	LOC100653137///CDH23	cadherin-23-like///cadherin-related 23
1557267_s_at	0.721	0.027075	3.68	-4.58	3.62	GEN1	GEN1, Holliday junction 5' flap endonuclease
206430_at	0.721	0.027083	-3.68	-4.58	-3.15	CDX1	caudal type homeobox 1
205908_s_at	0.721	0.027087	-3.68	-4.58	-5.12	OMD	osteomodulin
214350_at	0.721	0.027089	3.68	-4.58	3.62	SNTB2	syntrophin beta 2
230145_at	0.721	0.027094	-3.68	-4.58	-3.3	DUS3L	dihydrouridine synthase 3 like
215812_s_at	0.721	0.027097	3.68	-4.58	3.06	SLC6A10PB///SLC6A10P///SLC6A8	solute carrier family 6 member 8 pseudogene///solute carrier family 6 member 10, pseudogene///solute carrier family 6 member 8
205391_x_at	0.721	0.027104	-3.68	-4.58	-3.06	ANK1	ankyrin 1
240049_at	0.721	0.027107	-3.68	-4.58	-3.39
[truncated: 52,677 more rows]
