# Supplementary material for: Identification and prognostic value of DLGAP5 in endometrial cancer
Source: PeerJ. 2020 Nov 27;8:e10433. doi: 10.7717/peerj.10433 (PMC7703392; doi:10.7717/peerj.10433)
Supplement: Supplemental Information 3 [file peerj-08-10433-s003.xlsx]

## Sheet: GSE63678
ID	adj.P.Val	P.Value	t	B	logFC	Gene.symbol	Gene.title
202847_at	0.0118	5.31e-07	9.54201	6.27029	1.35173	PCK2	phosphoenolpyruvate carboxykinase 2, mitochondrial
218883_s_at	0.0146	1.75e-06	8.53533	5.27292	2.63018	CENPU	centromere protein U
201664_at	0.0146	1.96e-06	8.44222	5.1742	1.39804	SMC4	structural maintenance of chromosomes 4
202705_at	0.0159	4.95e-06	7.72264	4.37164	2.8164	CCNB2	cyclin B2
203328_x_at	0.0159	5.49e-06	7.64539	4.28115	1.24452	IDE	insulin degrading enzyme
217496_s_at	0.0159	5.57e-06	7.63471	4.26857	1.50666	IDE	insulin degrading enzyme
204026_s_at	0.0159	6.23e-06	7.55154	4.17005	2.75656	ZWINT	ZW10 interacting kinetochore protein
214710_s_at	0.0159	6.48e-06	7.52248	4.13538	2.72141	CCNB1	cyclin B1
217593_at	0.0159	7.41e-06	-7.42367	4.0166	-1.76072	ZSCAN18	zinc finger and SCAN domain containing 18
212038_s_at	0.0159	8.04e-06	7.36343	3.94346	1.29258	VDAC1	voltage dependent anion channel 1
58916_at	0.0159	8.2e-06	7.34933	3.92626	2.7044	NDUFC2-KCTD14///KCTD14	NDUFC2-KCTD14 readthrough///potassium channel tetramerization domain containing 14
209481_at	0.0159	1.01e-05	-7.19575	3.73701	-1.09682	SNRK	SNF related kinase
219148_at	0.0159	1.2e-05	7.07277	3.58289	3.21797	PBK	PDZ binding kinase
217968_at	0.0159	1.21e-05	7.07166	3.58149	1.19351	TSSC1	tumor suppressing subtransferable candidate 1
204825_at	0.0159	1.24e-05	7.0502	3.55436	2.60959	MELK	maternal embryonic leucine zipper kinase
205195_at	0.0159	1.34e-05	6.99661	3.48628	1.4151	AP1S1	adaptor related protein complex 1 sigma 1 subunit
218039_at	0.0159	1.36e-05	6.98823	3.4756	2.79962	NUSAP1	nucleolar and spindle associated protein 1
205483_s_at	0.0159	1.41e-05	6.95988	3.43937	1.69387	ISG15	ISG15 ubiquitin-like modifier
209825_s_at	0.0159	1.43e-05	6.95028	3.42707	1.59398	MIR3658///UCK2	microRNA 3658///uridine-cytidine kinase 2
212222_at	0.0159	1.46e-05	-6.93406	3.40627	-1.62285	PSME4	proteasome activator subunit 4
202954_at	0.0159	1.54e-05	6.89847	3.36047	2.47058	UBE2C	ubiquitin conjugating enzyme E2 C
203554_x_at	0.0159	1.57e-05	6.8865	3.34502	2.8778	PTTG1	pituitary tumor-transforming 1
218009_s_at	0.0162	1.74e-05	6.81411	3.25112	2.0231	PRC1	protein regulator of cytokinesis 1
206142_at	0.0162	1.8e-05	-6.78937	3.21884	-1.5003	ZNF135	zinc finger protein 135
214294_at	0.0162	1.84e-05	-6.77506	3.20012	-0.677703	KIAA0485	uncharacterized LOC57235
202455_at	0.0162	1.99e-05	-6.72198	3.13042	-1.28891	HDAC5	histone deacetylase 5
202503_s_at	0.0162	2.15e-05	6.66679	3.05747	2.99323	KIAA0101	KIAA0101
219545_at	0.0162	2.22e-05	6.64508	3.02865	2.36324	NDUFC2-KCTD14///KCTD14	NDUFC2-KCTD14 readthrough///potassium channel tetramerization domain containing 14
205196_s_at	0.0162	2.29e-05	6.62581	3.003	1.22804	AP1S1	adaptor related protein complex 1 sigma 1 subunit
209008_x_at	0.0162	2.43e-05	6.58572	2.94945	3.0102	KRT8	keratin 8
202713_s_at	0.0162	2.43e-05	6.58405	2.94721	1.06373	KIAA0391///PSMA6	KIAA0391///proteasome subunit alpha 6
201291_s_at	0.0162	2.53e-05	6.55804	2.91233	2.91688	TOP2A	topoisomerase (DNA) II alpha
213726_x_at	0.0162	2.53e-05	6.55605	2.90966	1.08748	TUBB4B	tubulin beta 4B class IVb
208977_x_at	0.0162	2.63e-05	6.53178	2.87699	1.03529	TUBB4B	tubulin beta 4B class IVb
218755_at	0.0162	2.74e-05	6.50349	2.83881	2.34489	KIF20A	kinesin family member 20A
219855_at	0.0162	2.78e-05	-6.49217	2.82349	-1.91046	NUDT11	nudix hydrolase 11
207499_x_at	0.0162	2.9e-05	-6.46479	2.78636	-0.759226	UNC45A	unc-45 myosin chaperone A
203068_at	0.0162	2.95e-05	-6.45262	2.76982	-1.54529	KLHL21	kelch like family member 21
204444_at	0.0162	3.04e-05	6.43278	2.7428	1.97508	KIF11	kinesin family member 11
210368_at	0.0162	3.05e-05	-6.43178	2.74144	-0.955491	PCDHGA8	protocadherin gamma subfamily A, 8
212803_at	0.0162	3.08e-05	-6.42375	2.73048	-1.12189	NAB2	NGFI-A binding protein 2
222077_s_at	0.0162	3.22e-05	6.39371	2.68941	1.63785	RACGAP1	Rac GTPase activating protein 1
201292_at	0.0162	3.26e-05	6.38696	2.68016	2.46813	TOP2A	topoisomerase (DNA) II alpha
210839_s_at	0.0162	3.27e-05	-6.38466	2.677	-2.74169	ENPP2	ectonucleotide pyrophosphatase/phosphodiesterase 2
220711_at	0.0162	3.46e-05	-6.34657	2.62466	-1.7133
204119_s_at	0.0162	3.47e-05	6.34544	2.6231	1.35498	ADK	adenosine kinase
219121_s_at	0.0162	3.48e-05	6.34361	2.62058	2.45237	ESRP1	epithelial splicing regulatory protein 1
214663_at	0.0162	3.64e-05	-6.31371	2.57932	-1.5775	DSTYK	dual serine/threonine and tyrosine protein kinase
212504_at	0.0162	3.69e-05	-6.30462	2.56674	-1.14209	DIP2C	disco interacting protein 2 homolog C
219544_at	0.0162	3.74e-05	6.29492	2.55331	1.63774	BORA	bora, aurora kinase A activator
202095_s_at	0.0162	3.77e-05	6.2894	2.54566	2.596	BIRC5	baculoviral IAP repeat containing 5
207828_s_at	0.0162	3.78e-05	6.28848	2.54438	2.2006	CENPF	centromere protein F
211730_s_at	0.0167	3.97e-05	6.25568	2.49881	0.818803	POLR2L	RNA polymerase II subunit L
213892_s_at	0.0174	4.25e-05	6.2104	2.4356	0.760477	APRT	adenine phosphoribosyltransferase
202172_at	0.0174	4.31e-05	-6.20208	2.42396	-0.882238	VEZF1	vascular endothelial zinc finger 1
202428_x_at	0.0174	4.37e-05	6.19229	2.41024	1.53054	DBI	diazepam binding inhibitor, acyl-CoA binding protein
208813_at	0.0175	4.48e-05	6.17576	2.38703	1.11018	GOT1	glutamic-oxaloacetic transaminase 1
210867_at	0.0175	4.55e-05	-6.16519	2.37217	-1.0496	CNOT4	CCR4-NOT transcription complex subunit 4
211762_s_at	0.0177	4.69e-05	6.14546	2.34438	1.75213	KPNA2	karyopherin subunit alpha 2
211070_x_at	0.018	4.85e-05	6.12388	2.31391	1.63014	DBI	diazepam binding inhibitor, acyl-CoA binding protein
204467_s_at	0.0181	4.97e-05	-6.10838	2.29199	-2.06503	SNCA	synuclein alpha
203755_at	0.019	5.28e-05	6.0684	2.23525	2.62109	BUB1B	BUB1 mitotic checkpoint serine/threonine kinase B
219787_s_at	0.0192	5.55e-05	6.03678	2.19019	2.54991	ECT2	epithelial cell transforming 2
209773_s_at	0.0192	5.56e-05	6.03564	2.18856	3.24962	RRM2	ribonucleotide reductase regulatory subunit M2
204962_s_at	0.0192	5.68e-05	6.02137	2.16817	2.19356	SLC35F6///CENPA	solute carrier family 35 member F6///centromere protein A
209392_at	0.0192	5.73e-05	-6.01644	2.16112	-2.64041	ENPP2	ectonucleotide pyrophosphatase/phosphodiesterase 2
222378_at	0.0192	5.76e-05	-6.01257	2.15557	-1.19111
203997_at	0.0196	6.06e-05	5.97968	2.1084	2.07731	PTPN3	protein tyrosine phosphatase, non-receptor type 3
207165_at	0.0196	6.32e-05	5.95249	2.06927	1.89129	HMMR	hyaluronan mediated motility receptor
215385_at	0.0196	6.36e-05	-5.94911	2.06441	-1.46468
212527_at	0.0196	6.75e-05	5.91047	2.00857	1.53301	DESI1	desumoylating isopeptidase 1
209208_at	0.0196	6.88e-05	5.89842	1.99109	1.31735	MPDU1	mannose-P-dolichol utilization defect 1
213650_at	0.0196	6.9e-05	-5.89634	1.98808	-0.945231	LOC101930583///GOLGA8B///GOLGA8A	uncharacterized LOC101930583///golgin A8 family member B///golgin A8 family member A
204327_s_at	0.0196	6.9e-05	-5.89614	1.98779	-0.752208	ZNF202	zinc finger protein 202
218542_at	0.0196	6.99e-05	5.88786	1.97577	2.63549	CEP55	centrosomal protein 55
218662_s_at	0.0196	7.01e-05	5.88667	1.97404	2.02456	NCAPG	non-SMC condensin I complex subunit G
202338_at	0.0196	7.05e-05	5.88299	1.9687	1.51465	TK1	thymidine kinase 1
215390_at	0.0196	7.1e-05	-5.87843	1.96207	-1.33712
219918_s_at	0.0196	7.1e-05	5.87791	1.96131	2.52751	ASPM	abnormal spindle microtubule assembly
218031_s_at	0.0196	7.14e-05	-5.87508	1.95721	-1.12253	FOXN3	forkhead box N3
203360_s_at	0.0196	7.14e-05	5.87496	1.95702	1.46835	GJA9-MYCBP///GJA9///MYCBP	GJA9-MYCBP readthrough///gap junction protein alpha 9///MYC binding protein
220818_s_at	0.0196	7.26e-05	-5.86373	1.94069	-1.3792	TRPC4	transient receptor potential cation channel subfamily C member 4
213075_at	0.0196	7.29e-05	-5.86175	1.9378	-2.33959	OLFML2A	olfactomedin like 2A
218648_at	0.0196	7.51e-05	-5.84271	1.91006	-0.889161	CRTC3	CREB regulated transcription coactivator 3
218252_at	0.0196	7.61e-05	5.83441	1.89794	1.57919	CKAP2	cytoskeleton associated protein 2
202870_s_at	0.0196	7.69e-05	5.8273	1.88754	2.4544	CDC20	cell division cycle 20
212694_s_at	0.0196	7.73e-05	5.82415	1.88294	1.53095	PCCB	propionyl-CoA carboxylase beta subunit
201077_s_at	0.0196	7.8e-05	5.8183	1.87437	0.643931	SNU13///ANXA2	SNU13 homolog, small nuclear ribonucleoprotein (U4/U6.U5)///annexin A2
208805_at	0.0196	7.95e-05	5.80613	1.85656	0.817531	KIAA0391///PSMA6	KIAA0391///proteasome subunit alpha 6
215203_at	0.0196	7.99e-05	-5.80314	1.85218	-1.03353	GOLGA4	golgin A4
201644_at	0.0196	8.16e-05	5.79017	1.83315	1.17471	TSTA3	tissue specific transplantation antigen P35B
222161_at	0.0196	8.17e-05	-5.78922	1.83176	-2.67512	NAALAD2	N-acetylated alpha-linked acidic dipeptidase 2
220038_at	0.0196	8.23e-05	-5.7843	1.82454	-1.16976	C8orf44-SGK3///SGK3	C8orf44-SGK3 readthrough///serum/glucocorticoid regulated kinase family member 3
210230_at	0.0196	8.28e-05	-5.78059	1.81908	-2.43884
206829_x_at	0.0199	8.51e-05	-5.76351	1.79396	-1.2873	ZNF430	zinc finger protein 430
203214_x_at	0.02	8.71e-05	5.74878	1.77226	2.17478	CDK1	cyclin dependent kinase 1
202207_at	0.02	8.74e-05	5.74663	1.76908	2.95612	ARL4C	ADP ribosylation factor like GTPase 4C
209626_s_at	0.02	8.78e-05	5.74369	1.76474	1.98993	OSBPL3	oxysterol binding protein like 3
203379_at	0.02	8.96e-05	5.73067	1.74552	1.73046	RPS6KA1	ribosomal protein S6 kinase A1
204154_at	0.02	9.02e-05	-5.72673	1.7397	-2.39734	CDO1	cysteine dioxygenase type 1
201714_at	0.02	9.05e-05	5.72447	1.73636	1.17373	TUBG1	tubulin gamma 1
217848_s_at	0.0201	9.22e-05	5.71293	1.71928	1.42168	PPA1	pyrophosphatase (inorganic) 1
213488_at	0.0203	9.4e-05	-5.70062	1.70105	-2.61774	SNED1	sushi, nidogen and EGF like domains 1
219595_at	0.0214	9.97e-05	-5.66369	1.64619	-0.618797	ZNF26	zinc finger protein 26
207474_at	0.0216	0.000102	-5.64926	1.62469	-1.70132	SNRK	SNF related kinase
200682_s_at	0.0216	0.000103	5.6434	1.61594	0.702481	UBE2L3	ubiquitin conjugating enzyme E2 L3
205078_at	0.0217	0.000105	5.63289	1.60025	1.08017	PIGF	phosphatidylinositol glycan anchor biosynthesis class F
201088_at	0.0217	0.000106	5.62624	1.59032	1.66918	KPNA2	karyopherin subunit alpha 2
203764_at	0.0217	0.000106	5.62375	1.58659	2.45775	DLGAP5	DLG associated protein 5
201596_x_at	0.0218	0.000109	5.60595	1.55997	3.21481	KRT18	keratin 18
206271_at	0.0218	0.00011	5.60465	1.55802	1.08242	TLR3	toll like receptor 3
205677_s_at	0.0218	0.000111	5.59509	1.54368	1.26874	DLEU1	deleted in lymphocytic leukemia 1
210042_s_at	0.0218	0.000112	5.58868	1.53407	2.89236	CTSZ	cathepsin Z
214682_at	0.0218	0.000113	-5.58616	1.53029	-1.48224	PKD1P1	polycystin 1, transient receptor potential channel interacting pseudogene 1
202589_at	0.0218	0.000114	5.58259	1.52493	2.60249	TYMS	thymidylate synthetase
205088_at	0.0218	0.000114	-5.57958	1.52041	-2.08695	MAMLD1	mastermind like domain containing 1
219978_s_at	0.0218	0.000117	5.56623	1.50033	2.02861	NUSAP1	nucleolar and spindle associated protein 1
209530_at	0.0218	0.000117	-5.56561	1.49941	-1.01017	CACNB3	calcium voltage-gated channel auxiliary subunit beta 3
215350_at	0.0218	0.000117	-5.56552	1.49926	-0.889659	SYNE1	spectrin repeat containing nuclear envelope protein 1
203545_at	0.0219	0.000118	5.55777	1.48761	0.617518	ALG8	ALG8, alpha-1,3-glucosyltransferase
209389_x_at	0.0219	0.00012	5.54998	1.47586	1.56211	DBI	diazepam binding inhibitor, acyl-CoA binding protein
209714_s_at	0.0219	0.000122	5.5397	1.46036	2.11773	CDKN3	cyclin dependent kinase inhibitor 3
215577_at	0.0219	0.000123	-5.53247	1.44945	-0.789317
220746_s_at	0.0219	0.000124	-5.52684	1.44096	-0.736441	UIMC1	ubiquitin interaction motif containing 1
212568_s_at	0.0219	0.000125	5.5248	1.43787	1.00819	DLAT	dihydrolipoamide S-acetyltransferase
202206_at	0.0219	0.000125	5.52332	1.43563	2.79696	ARL4C	ADP ribosylation factor like GTPase 4C
215140_at	0.0219	0.000126	-5.52044	1.43128	-1.12173
221064_s_at	0.0219	0.000126	-5.51849	1.42834	-1.69859	UNKL	unkempt family like zinc finger
201568_at	0.022	0.000128	5.51007	1.4156	0.737154	UQCRQ	ubiquinol-cytochrome c reductase complex III subunit VII
213708_s_at	0.0221	0.000129	5.50425	1.40678	0.650131	MLX	MLX, MAX dimerization protein
219116_s_at	0.0227	0.000134	-5.48131	1.37201	-0.753861	DCUN1D2	defective in cullin neddylation 1 domain containing 2
221191_at	0.0229	0.000136	-5.47172	1.35743	-1.02724	STAG3L3	stromal antigen 3-like 3 (pseudogene)
217871_s_at	0.0229	0.000138	5.46418	1.34597	1.62825	MIF	macrophage migration inhibitory factor (glycosylation-inhibiting factor)
203786_s_at	0.0229	0.000138	5.46298	1.34415	2.38157	TPD52L1	tumor protein D52-like 1
212858_at	0.0229	0.000139	5.45938	1.33868	1.25414	PAQR4	progestin and adipoQ receptor family member 4
204247_s_at	0.0233	0.000143	5.4409	1.31053	1.21225	CDK5	cyclin dependent kinase 5
208760_at	0.0233	0.000143	-5.43985	1.30893	-1.37329	UBE2I	ubiquitin conjugating enzyme E2 I
201890_at	0.024	0.00015	5.41249	1.26714	2.98108	RRM2	ribonucleotide reductase regulatory subunit M2
201189_s_at	0.024	0.000152	5.4037	1.2537	2.01772	ITPR3	inositol 1,4,5-trisphosphate receptor type 3
217398_x_at	0.024	0.000152	5.40347	1.25334	1.10121	GAPDH	glyceraldehyde-3-phosphate dehydrogenase
201900_s_at	0.024	0.000153	5.39995	1.24796	0.950222	AKR1A1	aldo-keto reductase family 1 member A1
204331_s_at	0.024	0.000153	5.39884	1.24625	1.09657	MRPS12	mitochondrial ribosomal protein S12
210559_s_at	0.0245	0.000158	5.38078	1.21857	2.3533	CDK1	cyclin dependent kinase 1
200925_at	0.0246	0.000159	5.37368	1.20768	0.653312	COX6A1	cytochrome c oxidase subunit 6A1
216229_x_at	0.0246	0.00016	-5.37006	1.20211	-0.909483	LOC105379655	uncharacterized LOC105379655
210180_s_at	0.0246	0.000161	-5.36775	1.19856	-0.767246	TRA2B	transformer 2 beta homolog (Drosophila)
205081_at	0.0248	0.000165	5.35112	1.17299	2.0173	CRIP1	cysteine rich protein 1
215358_x_at	0.0248	0.000169	-5.338	1.15278	-1.61713	ZNF37BP	zinc finger protein 37B, pseudogene
203276_at	0.0248	0.000169	5.33773	1.15238	2.62344	LMNB1	lamin B1
200872_at	0.0248	0.00017	5.3352	1.14847	1.99252	S100A10	S100 calcium binding protein A10
204403_x_at	0.0248	0.00017	-5.33329	1.14553	-0.684611	LOC100294033///TCAF1	protein FAM115A-like///TRPM8 channel associated factor 1
203145_at	0.0248	0.000171	5.33134	1.14252	1.58197	SPAG5	sperm associated antigen 5
216215_s_at	0.0248	0.000171	-5.33101	1.14201	-1.09317	RBFOX2	RNA binding protein, fox-1 homolog 2
201690_s_at	0.0248	0.000171	5.3296	1.13984	1.69878	TPD52	tumor protein D52
200996_at	0.0252	0.000175	5.31611	1.11902	0.823092	ACTR3	ARP3 actin related protein 3 homolog
210882_s_at	0.0252	0.000177	-5.31066	1.11059	-1.46122	TRO	trophinin
201415_at	0.0252	0.000177	5.30823	1.10683	0.944765	GSS	glutathione synthetase
204822_at	0.0252	0.00018	5.29955	1.09341	1.77107	TTK	TTK protein kinase
201663_s_at	0.0252	0.000181	5.29789	1.09085	1.43002	SMC4	structural maintenance of chromosomes 4
208313_s_at	0.0252	0.000181	-5.29526	1.08678	-0.564655	SF1	splicing factor 1
202785_at	0.0252	0.000182	5.29329	1.08372	0.889203	NDUFA7	NADH:ubiquinone oxidoreductase subunit A7
201577_at	0.0253	0.000184	5.28643	1.0731	1.70025	NME1	NME/NM23 nucleoside diphosphate kinase 1
209318_x_at	0.0253	0.000185	-5.28344	1.06846	-1.42846	PLAGL1	PLAG1 like zinc finger 1
200615_s_at	0.0254	0.000188	5.27263	1.05171	0.965008	AP2B1	adaptor related protein complex 2 beta 1 subunit
218556_at	0.0254	0.000188	5.27215	1.05096	1.42546	ORMDL2	ORMDL sphingolipid biosynthesis regulator 2
220484_at	0.0257	0.000191	-5.2624	1.03582	-1.92028	MCOLN3	mucolipin 3
204643_s_at	0.0259	0.000195	-5.25007	1.01666	-0.884899	ENOX2	ecto-NOX disulfide-thiol exchanger 2
220796_x_at	0.0259	0.000196	-5.24922	1.01533	-0.905889	SLC35E1	solute carrier family 35 member E1
212485_at	0.026	0.000197	-5.24411	1.00739	-0.643397	GPATCH8	G-patch domain containing 8
201012_at	0.026	0.000201	5.2332	0.99041	2.34701	ANXA1	annexin A1
212208_at	0.026	0.000201	-5.23279	0.98976	-0.825197	MED13L	mediator complex subunit 13 like
214753_at	0.026	0.000205	-5.22004	0.96989	-0.987269	N4BP2L2	NEDD4 binding protein 2 like 2
218451_at	0.026	0.000206	5.21766	0.96618	1.88328	CDCP1	CUB domain containing protein 1
202794_at	0.026	0.000207	-5.21458	0.96136	-0.632428	INPP1	inositol polyphosphate-1-phosphatase
204040_at	0.026	0.00021	-5.20565	0.94742	-1.68669	RNF144A	ring finger protein 144A
212296_at	0.026	0.000211	5.20418	0.94513	1.07388	PSMD14	proteasome 26S subunit, non-ATPase 14
213693_s_at	0.026	0.000216	5.19025	0.92335	2.49172	MUC1	mucin 1, cell surface associated
214707_x_at	0.026	0.000216	-5.18926	0.9218	-1.2373	ALMS1	ALMS1, centrosome and basal body associated protein
214102_at	0.026	0.000216	-5.18836	0.9204	-1.3464
201689_s_at	0.026	0.000217	5.18578	0.91636	1.87573	TPD52	tumor protein D52
202440_s_at	0.026	0.000218	-5.1841	0.91373	-1.54277	ST5	suppression of tumorigenicity 5
36936_at	0.026	0.000223	5.16927	0.89049	1.21661	TSTA3	tissue specific transplantation antigen P35B
206565_x_at	0.026	0.000224	-5.16866	0.88953	-1.26583	SMA4	glucuronidase beta pseudogene
218585_s_at	0.026	0.000229	5.15413	0.86674	2.03053	DTL	denticleless E3 ubiquitin protein ligase homolog
216858_x_at	0.026	0.00023	-5.15229	0.86385	-0.85486
202294_at	0.026	0.000232	-5.14676	0.85516	-0.882845	STAG1	stromal antigen 1
214940_s_at	0.026	0.000232	-5.14541	0.85303	-0.719914	SMG6	SMG6, nonsense mediated mRNA decay factor
208952_s_at	0.026	0.000233	5.14473	0.85197	0.797211	LARP4B	La ribonucleoprotein domain family member 4B
212017_at	0.026	0.000233	-5.14292	0.84911	-0.669375	FAM168B	family with sequence similarity 168 member B
208815_x_at	0.026	0.000234	5.14104	0.84617	1.07409	HSPA4	heat shock protein family A (Hsp70) member 4
202790_at	0.026	0.000235	5.13827	0.84181	2.46225	CLDN7	claudin 7
201827_at	0.026	0.000236	5.13719	0.84011	0.698491	SMARCD2	SWI/SNF related, matrix associated, actin dependent regulator of chromatin, subfamily d, member 2
217835_x_at	0.026	0.000237	5.13508	0.8368	0.847871	TGIF2-C20orf24///C20orf24	TGIF2-C20orf24 readthrough///chromosome 20 open reading frame 24
204981_at	0.026	0.000237	5.13479	0.83633	1.60536	SLC22A18	solute carrier family 22 member 18
208712_at	0.026	0.000238	5.13238	0.83255	1.98347	CCND1	cyclin D1
201284_s_at	0.026	0.000239	5.12926	0.82764	1.05991	APEH	acylaminoacyl-peptide hydrolase
208679_s_at	0.026	0.000239	5.12861	0.8266	0.810343	ARPC2	actin related protein 2/3 complex subunit 2
201523_x_at	0.026	0.000239	5.12857	0.82654	1.05242	UBE2N	ubiquitin conjugating enzyme E2 N
218362_s_at	0.026	0.00024	-5.1259	0.82233	-1.37543	DIS3	DIS3 homolog, exosome endoribonuclease and 3'-5' exoribonuclease
218073_s_at	0.026	0.000242	5.12113	0.81483	1.42481	NDC1	NDC1 transmembrane nucleoporin
215191_at	0.026	0.000244	-5.11636	0.80731	-0.835448
220272_at	0.026	0.000245	-5.11406	0.80368	-2.88525	BNC2	basonuclin 2
201543_s_at	0.026	0.000246	5.11052	0.79811	1.25696	SAR1A	secretion associated Ras related GTPase 1A
218567_x_at	0.026	0.000248	5.10749	0.79333	1.67812	DPP3	dipeptidyl peptidase 3
215483_at	0.026	0.000248	-5.10608	0.7911	-1.21039	AKAP9	A-kinase anchoring protein 9
32099_at	0.026	0.000249	-5.10415	0.78806	-0.715266	SAFB2	scaffold attachment factor B2
207842_s_at	0.026	0.000251	-5.10058	0.78242	-0.886067	MIR6866///CASC3	microRNA 6866///cancer susceptibility candidate 3
214715_x_at	0.026	0.000251	-5.1003	0.78197	-1.08007	ZNF160	zinc finger protein 160
219665_at	0.026	0.000251	5.0989	0.77977	0.810165	NUDT18	nudix hydrolase 18
206461_x_at	0.026	0.000252	5.09752	0.77758	1.61171	MT1H	metallothionein 1H
216813_at	0.026	0.000252	-5.09732	0.77727	-1.93579
57163_at	0.026	0.000253	5.09517	0.77387	0.719661	MIR6734///ELOVL1	microRNA 6734///ELOVL fatty acid elongase 1
205648_at	0.026	0.000254	-5.09247	0.76961	-1.75248	WNT2	Wnt family member 2
201400_at	0.026	0.000254	5.0917	0.76839	0.882246	PSMB3	proteasome subunit beta 3
203299_s_at	0.026	0.000255	-5.09031	0.76619	-1.52275	AP1S2	adaptor related protein complex 1 sigma 2 subunit
AFFX-HUMGAPDH/M33197_5_at	0.026	0.000255	5.08983	0.76544	1.47756	GAPDH	glyceraldehyde-3-phosphate dehydrogenase
218549_s_at	0.026	0.000255	5.08915	0.76437	1.27993	RMDN1	regulator of microtubule dynamics 1
209332_s_at	0.026	0.000256	-5.08853	0.76339	-0.793514	MAX	MYC associated factor X
222231_s_at	0.026	0.000256	5.08821	0.76288	1.46072	LRRC59	leucine rich repeat containing 59
203217_s_at	0.026	0.000257	-5.08469	0.75731	-1.52222	ST3GAL5	ST3 beta-galactoside alpha-2,3-sialyltransferase 5
203213_at	0.026	0.000261	5.07614	0.74379	1.7151	CDK1	cyclin dependent kinase 1
211695_x_at	0.026	0.000261	5.07563	0.74298	1.29664	MUC1	mucin 1, cell surface associated
201576_s_at	0.026	0.000262	5.07351	0.73962	1.08645	TMPPE///GLB1	transmembrane protein with metallophosphoesterase domain///galactosidase beta 1
221413_at	0.026	0.000263	-5.07295	0.73874	-0.981242	KCNAB3	potassium voltage-gated channel subfamily A regulatory beta subunit 3
212650_at	0.026	0.000263	-5.07206	0.73734	-0.97432	EHBP1	EH domain binding protein 1
203464_s_at	0.0262	0.000265	-5.06635	0.7283	-0.822086	EPN2-IT1///EPN2	EPN2 intronic transcript 1///epsin 2
200862_at	0.0263	0.000271	5.05423	0.70909	2.00723	DHCR24	24-dehydrocholesterol reductase
218486_at	0.0263	0.000273	-5.04971	0.70192	-1.25827	KLF11	Kruppel like factor 11
206073_at	0.0263	0.000273	-5.049	0.70079	-0.683467	COLQ	collagen like tail subunit of asymmetric acetylcholinesterase
210978_s_at	0.0263	0.000274	5.04847	0.69996	1.60781	TAGLN2	transgelin 2
215336_at	0.0263	0.000274	-5.04833	0.69972	-1.28491	AKAP11	A-kinase anchoring protein 11
200889_s_at	0.0263	0.000274	5.04643	0.69671	1.20578	SSR1	signal sequence receptor subunit 1
209478_at	0.0263	0.000275	5.04581	0.69572	0.911674	STRA13	stimulated by retinoic acid 13
217610_at	0.0267	0.00028	-5.03438	0.67757	-0.865701	SPDYE2	speedy/RINGO cell cycle regulator family member E2
213153_at	0.0268	0.000284	-5.0253	0.66314	-0.676451	SETD1B	SET domain containing 1B
207365_x_at	0.0268	0.000285	-5.02385	0.66084	-0.848866	USP34	ubiquitin specific peptidase 34
212455_at	0.0268	0.000286	-5.02241	0.65855	-0.71843	YTHDC1	YTH domain containing 1
209333_at	0.0268	0.000286	-5.02169	0.65741	-0.996593	ULK1	unc-51 like autophagy activating kinase 1
221272_s_at	0.0269	0.00029	-5.0144	0.6458	-1.63507	C1orf21	chromosome 1 open reading frame 21
215462_at	0.0269	0.000291	-5.01251	0.6428	-1.27842	PLK3	polo like kinase 3
216568_x_at	0.0269	0.000291	5.01234	0.64253	0.866087
202487_s_at	0.0269	0.000293	5.008	0.63561	0.938502	H2AFV	H2A histone family member V
218321_x_at	0.0269	0.000294	5.00531	0.63132	0.812937	STYXL1	serine/threonine/tyrosine interacting-like 1
209243_s_at	0.0269	0.000295	-5.0034	0.62829	-3.14094	PEG3	paternally expressed 3
217608_at	0.0269	0.000296	-5.00119	0.62476	-1.59344	SREK1IP1	SREK1 interacting protein 1
219902_at	0.0269	0.000297	-4.99881	0.62096	-2.31029	BHMT2	betaine--homocysteine S-methyltransferase 2
220416_at	0.0269	0.000299	-4.99633	0.61702	-1.52687	ATP8B4	ATPase phospholipid transporting 8B4 (putative)
218291_at	0.0272	0.000304	4.98581	0.60023	0.858876	LAMTOR2	late endosomal/lysosomal adaptor, MAPK and MTOR activator 2
207847_s_at	0.0272	0.000305	4.98441	0.59799	2.69209	MUC1	mucin 1, cell surface associated
205578_at	0.0272	0.000305	-4.98351	0.59656	-1.41553	ROR2	receptor tyrosine kinase like orphan receptor 2
218613_at	0.0272	0.000307	-4.98084	0.59228	-1.18395	PSD3	pleckstrin and Sec7 domain containing 3
218355_at	0.0272	0.000308	4.97746	0.58689	1.86602	KIF4A	kinesin family member 4A
202347_s_at	0.0272	0.000309	4.9769	0.58599	0.6285	UBE2K	ubiquitin conjugating enzyme E2 K
AFFX-HUMGAPDH/M33197_M_at	0.0272	0.00031	4.97474	0.58255	1.28334	GAPDH	glyceraldehyde-3-phosphate dehydrogenase
217536_x_at	0.0277	0.000318	-4.95972	0.55853	-1.41855
201725_at	0.0277	0.000319	4.95707	0.55429	0.650805	CDC123	cell division cycle 123
218163_at	0.0277	0.000321	4.9544	0.55002	0.937325	MCTS1	MCTS1, re-initiation and release factor
213776_at	0.0277	0.000321	-4.95341	0.54843	-1.16185	LOC157562	uncharacterized LOC157562
213266_at	0.0279	0.000325	-4.94627	0.53699	-0.93667	TP53BP1	tumor protein p53 binding protein 1
208103_s_at	0.0279	0.000325	4.94573	0.53613	1.97381	ANP32E	acidic nuclear phosphoprotein 32 family member E
200942_s_at	0.028	0.000328	4.94194	0.53005	0.707712	HSBP1	heat shock factor binding protein 1
204170_s_at	0.0283	0.000333	4.93279	0.51538	1.97702	CKS2	CDC28 protein kinase regulatory subunit 2
208612_at	0.0284	0.000336	4.92716	0.50635	1.03246	PDIA3	protein disulfide isomerase family A member 3
213101_s_at	0.0284	0.000336	4.92668	0.50557	0.759682	ACTR3	ARP3 actin related protein 3 homolog
212581_x_at	0.0284	0.000338	4.92282	0.49937	1.07952	GAPDH	glyceraldehyde-3-phosphate dehydrogenase
40446_at	0.0285	0.00034	-4.91926	0.49365	-1.00241	PHF1	PHD finger protein 1
217220_at	0.029	0.000349	-4.90467	0.4702	-1.37273	LOC100287387	uncharacterized LOC100287387
209390_at	0.029	0.000349	-4.90404	0.46918	-0.837585	TSC1	tuberous sclerosis 1
211595_s_at	0.0291	0.000352	4.89945	0.46181	0.817163	MRPS11	mitochondrial ribosomal protein S11
207757_at	0.0291	0.000353	-4.89793	0.45936	-1.16737	ZFP2	ZFP2 zinc finger protein
215281_x_at	0.0291	0.000354	-4.89615	0.4565	-1.38245	POGZ	pogo transposable element with ZNF domain
210052_s_at	0.0291	0.000355	4.89413	0.45325	2.30243	TPX2	TPX2, microtubule nucleation factor
214011_s_at	0.0291	0.000357	4.89072	0.44775	1.03726	NOP16	NOP16 nucleolar protein
212186_at	0.0291	0.000359	4.88824	0.44375	0.815543	ACACA	acetyl-CoA carboxylase alpha
214006_s_at	0.0291	0.00036	4.88654	0.44101	0.598408	GGCX	gamma-glutamyl carboxylase
202616_s_at	0.0291	0.00036	-4.88575	0.43975	-1.16863	MECP2	methyl-CpG binding protein 2
206056_x_at	0.0291	0.000362	-4.88344	0.43602	-0.734542	SPN	sialophorin
219395_at	0.0291	0.000364	4.87992	0.43035	1.93771	MIR6773///ESRP2	microRNA 6773///epithelial splicing regulatory protein 2
210880_s_at	0.0291	0.000364	-4.87965	0.4299	-1.5076	EFS	embryonal Fyn-associated substrate
203723_at	0.0291	0.000366	-4.87636	0.4246	-1.68825	ITPKB	inositol-trisphosphate 3-kinase B
221878_at	0.0293	0.00037	-4.87065	0.41539	-1.08855	C2orf68	chromosome 2 open reading frame 68
207233_s_at	0.0295	0.000373	-4.86522	0.40662	-2.18838	MITF	melanogenesis associated transcription factor
204155_s_at	0.0295	0.000375	-4.862	0.40142	-0.662054	SIK3	SIK family kinase 3
202096_s_at	0.0296	0.000381	4.85371	0.38804	1.15324	TSPO	translocator protein
203931_s_at	0.0296	0.000383	4.85076	0.38327	0.86347	MRPL12	mitochondrial ribosomal protein L12
211998_at	0.0296	0.000384	-4.84812	0.379	-1.61388	MIR4738///H3F3B///H3F3A	microRNA 4738///H3 histone, family 3B///H3 histone, family 3A
207833_s_at	0.0296	0.000384	4.84798	0.37877	0.701154	HLCS	holocarboxylase synthetase
205005_s_at	0.0296	0.000386	-4.8451	0.37412	-1.711	NMT2	N-myristoyltransferase 2
204398_s_at	0.0296	0.000387	4.84476	0.37357	1.03822	EML2	echinoderm microtubule associated protein like 2
215900_at	0.0296	0.000388	-4.84243	0.3698	-0.849265
204745_x_at	0.0296	0.000389	4.8416	0.36846	1.48148	MT1G	metallothionein 1G
214989_x_at	0.0296	0.00039	-4.83987	0.36565	-0.709219	PLEKHA5	pleckstrin homology domain containing A5
202566_s_at	0.0296	0.000394	-4.83341	0.35519	-2.13065	SVIL	supervillin
209369_at	0.0296	0.000395	4.83216	0.35317	2.00451	ANXA3	annexin A3
202251_at	0.0296	0.000397	-4.82861	0.34743	-0.659106	PRPF3	pre-mRNA processing factor 3
AFFX-HUMGAPDH/M33197_3_at	0.0296	0.000398	4.82754	0.34568	0.924176	GAPDH	glyceraldehyde-3-phosphate dehydrogenase
204092_s_at	0.0296	0.000399	4.82679	0.34448	1.84293	AURKA	aurora kinase A
218284_at	0.0296	0.000399	-4.8255	0.34238	-1.13756	SMAD3	SMAD family member 3
215373_x_at	0.0296	0.0004	-4.82402	0.33998	-0.884887
212124_at	0.0296	0.000401	-4.82393	0.33984	-1.22115	ZMIZ1	zinc finger MIZ-type containing 1
203560_at	0.0296	0.000401	4.82258	0.33765	2.28443	GGH	gamma-glutamyl hydrolase
210476_s_at	0.0296	0.000402	-4.82139	0.33572	-0.757172	PRLR	prolactin receptor
208079_s_at	0.0296	0.000403	4.82029	0.33395	1.8149	AURKA	aurora kinase A
217506_at	0.0296	0.000405	-4.81773	0.32978	-2.40308
216952_s_at	0.0296	0.000407	4.81507	0.32548	1.25032	LMNB2	lamin B2
215012_at	0.0296	0.000408	-4.81382	0.32345	-1.15003	ZNF451	zinc finger protein 451
212378_at	0.0296	0.000408	4.8125	0.32131	0.790793	GART	phosphoribosylglycinamide formyltransferase, phosphoribosylglycinamide synthetase, phosphoribosylaminoimidazole synthetase
218528_s_at	0.0296	0.000409	-4.81132	0.3194	-1.02004	RNF38	ring finger protein 38
220924_s_at	0.0296	0.000411	-4.8094	0.31627	-0.876246	SLC38A2	solute carrier family 38 member 2
204565_at	0.0297	0.000415	4.80366	0.30695	1.05551	ACOT13	acyl-CoA thioesterase 13
212350_at	0.0297	0.000415	-4.8029	0.30572	-1.45866	TBC1D1	TBC1 domain family member 1
213453_x_at	0.0297	0.000417	4.80051	0.30185	1.10118	GAPDH	glyceraldehyde-3-phosphate dehydrogenase
200831_s_at	0.0297	0.000418	4.79894	0.29929	1.44185	SCD	stearoyl-CoA desaturase
207180_s_at	0.0297	0.000421	4.79551	0.29372	1.14824	HTATIP2	HIV-1 Tat interactive protein 2
207265_s_at	0.0297	0.000421	4.7945	0.29208	1.50718	KDELR3	KDEL endoplasmic reticulum protein retention receptor 3
221771_s_at	0.0297	0.000421	-4.79428	0.29172	-1.1929	MPHOSPH8	M-phase phosphoprotein 8
212023_s_at	0.03	0.000426	4.78775	0.28112	1.44414	MKI67	marker of proliferation Ki-67
209627_s_at	0.0302	0.000431	4.78134	0.27069	1.60614	OSBPL3	oxysterol binding protein like 3
212529_at	0.0303	0.000434	4.77691	0.26348	0.897617	LSM12	LSM12 homolog
34726_at	0.0304	0.000437	-4.77361	0.2581	-1.21697	CACNB3	calcium voltage-gated channel auxiliary subunit beta 3
211833_s_at	0.0304	0.000442	4.76673	0.2469	1.67392	BAX	BCL2 associated X, apoptosis regulator
209441_at	0.0304	0.000444	-4.76456	0.24336	-0.41589	RHOBTB2	Rho related BTB domain containing 2
212692_s_at	0.0304	0.000444	4.76368	0.24192	1.19578	LRBA	LPS responsive beige-like anchor protein
218694_at	0.0304	0.000445	-4.76317	0.2411	-2.55768	ARMCX1	armadillo repeat containing, X-linked 1
210372_s_at	0.0304	0.000445	4.76232	0.23972	2.57064	TPD52L1	tumor protein D52-like 1
201298_s_at	0.0304	0.000446	4.76105	0.23764	1.1566	MOB1A	MOB kinase activator 1A
202208_s_at	0.0304	0.000446	4.76076	0.23718	1.7489	ARL4C	ADP ribosylation factor like GTPase 4C
213366_x_at	0.0304	0.000449	4.75713	0.23126	0.601573	ATP5C1	ATP synthase, H+ transporting, mitochondrial F1 complex, gamma polypeptide 1
218357_s_at	0.0304	0.00045	4.75592	0.22929	0.895222	TIMM8B	translocase of inner mitochondrial membrane 8 homolog B
214697_s_at	0.0304	0.00045	4.75582	0.22912	1.3357	PTBP3	polypyrimidine tract binding protein 3
201193_at	0.0304	0.000453	4.75175	0.22248	1.776	IDH1	isocitrate dehydrogenase (NADP(+)) 1, cytosolic
214431_at	0.0304	0.000458	4.74609	0.21324	0.63796	GMPS	guanine monophosphate synthase
209709_s_at	0.0304	0.000458	4.74567	0.21256	1.43693	HMMR	hyaluronan mediated motility receptor
207730_x_at	0.0304	0.000459	-4.74525	0.21187	-1.13006
215179_x_at	0.0304	0.000459	-4.74414	0.21006	-0.796604	PGF	placental growth factor
39705_at	0.0304	0.00046	-4.74395	0.20976	-0.936409	SIN3B	SIN3 transcription regulator family member B
204616_at	0.0304	0.000462	4.74151	0.20577	1.28625	UCHL3	ubiquitin C-terminal hydrolase L3
209836_x_at	0.0304	0.000463	4.73982	0.20301	1.14974	BOLA2B///BOLA2	bolA family member 2B///bolA family member 2
219854_at	0.0304	0.000465	-4.73729	0.19887	-0.918905	ZNF14	zinc finger protein 14
202154_x_at	0.0304	0.000465	4.73712	0.1986	0.831212	TUBB3	tubulin beta 3 class III
202001_s_at	0.0304	0.000465	4.73696	0.19834	0.787348	NDUFA6	NADH:ubiquinone oxidoreductase subunit A6
219871_at	0.0306	0.00047	-4.73153	0.18946	-1.79396	KLF3-AS1	KLF3 antisense RNA 1
219215_s_at	0.0308	0.000475	4.72523	0.17918	1.45434	SLC39A4	solute carrier family 39 member 4
204767_s_at	0.0308	0.000478	4.72174	0.17346	1.24125	FEN1	flap structure-specific endonuclease 1
203672_x_at	0.0308	0.000481	4.71757	0.16664	0.710328	TPMT	thiopurine S-methyltransferase
203031_s_at	0.0308	0.000482	4.71653	0.16494	0.819428	UROS	uroporphyrinogen III synthase
203662_s_at	0.0308	0.000484	-4.71387	0.16059	-2.94004	TMOD1	tropomodulin 1
209873_s_at	0.0308	0.000484	4.71352	0.16002	1.80405	PKP3	plakophilin 3
205964_at	0.0308	0.000485	-4.71275	0.15876	-1.09849	ZNF426	zinc finger protein 426
201999_s_at	0.0308	0.000486	4.71138	0.15651	0.775451	DYNLT1	dynein light chain Tctex-type 1
35148_at	0.0308	0.000491	4.70517	0.14635	1.55647	TJP3	tight junction protein 3
219682_s_at	0.0308	0.000495	-4.70145	0.14026	-2.28448	TBX3	T-box 3
212143_s_at	0.0308	0.000495	-4.70066	0.13895	-1.78459	IGFBP3	insulin like growth factor binding protein 3
202636_at	0.0308	0.000496	-4.69985	0.13763	-0.878174	RNF103	ring finger protein 103
205854_at	0.0308	0.000496	-4.69961	0.13724	-1.01618	TULP3	tubby like protein 3
221905_at	0.0308	0.000498	-4.69801	0.13461	-1.0241	CYLD	CYLD lysine 63 deubiquitinase
213412_at	0.0308	0.000499	4.69589	0.13114	1.36174	TJP3	tight junction protein 3
212534_at	0.0308	0.000501	-4.69438	0.12866	-0.538726	ZNF24	zinc finger protein 24
204702_s_at	0.0308	0.000501	4.69397	0.12799	1.72125	NFE2L3	nuclear factor, erythroid 2 like 3
200660_at	0.0308	0.000501	4.69397	0.12799	2.02967	S100A11	S100 calcium binding protein A11
205167_s_at	0.0308	0.000503	4.69205	0.12485	0.824711	CDC25C	cell division cycle 25C
218447_at	0.0308	0.000503	4.69173	0.12432	1.07912	CMC2	C-X9-C motif containing 2
205733_at	0.0308	0.000509	4.68543	0.11398	1.51097	BLM	Bloom syndrome RecQ like helicase
211066_x_at	0.0308	0.000509	-4.68488	0.11309	-1.04319	PCDHGA1///PCDHGA2///PCDHGA3///PCDHGA4///PCDHGA5///PCDHGA6///PCDHGA7///PCDHGA9///PCDHGA10///PCDHGA11///PCDHGB1///PCDHGB2///PCDHGB3///PCDHGB5///PCDHGB6///PCDHGB7///PCDHGC4///PCDHGC5///PCDHGA12///PCDHGA8///PCDHGB4///PCDHGC3	protocadherin gamma subfamily A, 1///protocadherin gamma subfamily A, 2///protocadherin gamma subfamily A, 3///protocadherin gamma subfamily A, 4///protocadherin gamma subfamily A, 5///protocadherin gamma subfamily A, 6///protocadherin gamma subfamily A, 7///protocadherin gamma subfamily A, 9///protocadherin gamma subfamily A, 10///protocadherin gamma subfamily A, 11///protocadherin gamma subfami…
213924_at	0.0308	0.000511	-4.68272	0.10953	-1.55359	GNAL	G protein subunit alpha L
213269_at	0.0308	0.000511	-4.68244	0.10908	-1.16906	ZNF248	zinc finger protein 248
218350_s_at	0.0308	0.000512	4.68186	0.10813	1.14451	GMNN	geminin, DNA replication inhibitor
215359_x_at	0.0308	0.000515	-4.67849	0.1026	-1.28132	LOC101060181///ZNF44	zinc finger protein ZnFP12///zinc finger protein 44
217962_at	0.0308	0.000517	4.67564	0.09792	0.771368	NOP10	NOP10 ribonucleoprotein
202622_s_at	0.0308	0.000517	-4.67533	0.09741	-0.548567	ATXN2	ataxin 2
203950_s_at	0.0308	0.000518	-4.67446	0.09597	-0.75768	CLCN6	chloride voltage-gated channel 6
210095_s_at	0.0308	0.000519	-4.67403	0.09527	-1.4202	IGFBP3	insulin like growth factor binding protein 3
222252_x_at	0.0308	0.000519	-4.67393	0.09511	-0.777676	UBQLN4	ubiquilin 4
218190_s_at	0.0308	0.000519	4.67322	0.09394	0.680632	UQCR10	ubiquinol-cytochrome c reductase, complex III subunit X
200940_s_at	0.0308	0.000522	-4.66995	0.08857	-1.33599	RERE	arginine-glutamic acid dipeptide repeats
213416_at	0.0308	0.000523	4.66934	0.08757	1.55738	ITGA4	integrin subunit alpha 4
216094_at	0.0308	0.000523	-4.66898	0.08699	-0.859239
219211_at	0.0308	0.000523	4.66875	0.08661	1.10522	USP18	ubiquitin specific peptidase 18
44696_at	0.0309	0.000529	-4.66247	0.07628	-0.472342	TBC1D13	TBC1 domain family member 13
201886_at	0.0309	0.000532	4.65962	0.07159	0.63368	DCAF11	DDB1 and CUL4 associated factor 11
201435_s_at	0.0309	0.000533	4.65875	0.07016	1.14608	EIF4E	eukaryotic translation initiation factor 4E
218808_at	0.0309	0.000534	-4.65755	0.06818	-0.531408	DALRD3	DALR anticodon binding domain containing 3
204326_x_at	0.0309	0.000535	4.656	0.06564	1.80458	MT1X	metallothionein 1X
211248_s_at	0.0309	0.000536	-4.65507	0.06411	-1.09928	CHRD	chordin
201457_x_at	0.0309	0.000537	4.65375	0.06194	0.859512	BUB3	BUB3, mitotic checkpoint protein
203362_s_at	0.0309	0.000537	4.65352	0.06156	2.10933	MAD2L1	MAD2 mitotic arrest deficient-like 1 (yeast)
210571_s_at	0.0309	0.000538	-4.65328	0.06117	-1.13257	CMAHP	cytidine monophospho-N-acetylneuraminic acid hydroxylase, pseudogene
201244_s_at	0.0309	0.000538	-4.65242	0.05975	-0.544229	RAF1	Raf-1 proto-oncogene, serine/threonine kinase
34858_at	0.0309	0.00054	-4.6505	0.05658	-0.560663	KCTD2	potassium channel tetramerization domain containing 2
215439_x_at	0.0309	0.000542	-4.64907	0.05424	-1.15097
215978_x_at	0.0309	0.000542	-4.64816	0.05275	-0.91874	ZNF721	zinc finger protein 721
203779_s_at	0.0309	0.000544	4.64683	0.05054	1.99772	MPZL2	myelin protein zero like 2
208309_s_at	0.031	0.000547	4.64367	0.04535	1.27012	MALT1	MALT1 paracaspase
213947_s_at	0.031	0.000548	4.64204	0.04267	1.25624	NUP210	nucleoporin 210
212439_at	0.031	0.00055	-4.64017	0.03959	-0.557735	IP6K1	inositol hexakisphosphate kinase 1
220161_s_at	0.031	0.000551	4.63905	0.03775	2.12961	EPB41L4B	erythrocyte membrane protein band 4.1 like 4B
200822_x_at	0.0319	0.000569	4.62043	0.00705	1.11896	TPI1	triosephosphate isomerase 1
202546_at	0.0319	0.000571	4.61882	0.00438	2.17162	VAMP8	vesicle associated membrane protein 8
213493_at	0.0319	0.000576	-4.61328	-0.00475	-1.30383	SNED1	sushi, nidogen and EGF like domains 1
213011_s_at	0.0319	0.000576	4.61326	-0.0048	1.20042	TPI1	triosephosphate isomerase 1
202423_at	0.0319	0.000578	-4.61122	-0.00816	-0.745002	KAT6A	lysine acetyltransferase 6A
214808_at	0.0319	0.000579	-4.61059	-0.0092	-1.50195
219843_at	0.0319	0.000581	-4.60899	-0.01184	-0.701954	IPP	intracisternal A particle-promoted polypeptide
222368_at	0.0319	0.000584	-4.6062	-0.01645	-1.84436
204204_at	0.0319	0.000584	4.60539	-0.01778	1.11928	SLC31A2	solute carrier family 31 member 2
202928_s_at	0.0319	0.000585	-4.60508	-0.01831	-0.926035	PHF1	PHD finger protein 1
202427_s_at	0.0319	0.000585	4.60463	-0.01904	0.78423	MPC2	mitochondrial pyruvate carrier 2
222054_at	0.0319	0.000586	-4.60409	-0.01993	-1.43647	PPIEL	peptidylprolyl isomerase E like pseudogene
204824_at	0.0319	0.000587	4.60279	-0.02208	1.73246	ENDOG	endonuclease G
200685_at	0.0319	0.000587	-4.60237	-0.02278	-1.3643	SRSF11	serine and arginine rich splicing factor 11
217140_s_at	0.032	0.000591	4.59866	-0.02891	1.1902	VDAC1	voltage dependent anion channel 1
209665_at	0.032	0.000592	4.59834	-0.02943	0.997768	CYB561D2	cytochrome b561 family member D2
209242_at	0.032	0.000594	-4.59623	-0.03293	-3.94497	PEG3	paternally expressed 3
214714_at	0.032	0.000594	-4.59582	-0.03359	-1.06963	ZNF394	zinc finger protein 394
215907_at	0.032	0.000597	-4.59296	-0.03833	-1.06809
220760_x_at	0.032	0.0006	-4.59002	-0.04319	-1.12213	ZNF665	zinc finger protein 665
204422_s_at	0.032	0.000601	-4.58977	-0.04361	-2.36397	FGF2	fibroblast growth factor 2
205190_at	0.032	0.000602	4.5883	-0.04603	2.79908	PLS1	plastin 1
201135_at	0.032	0.000604	4.58678	-0.04855	0.832498	ECHS1	enoyl-CoA hydratase, short chain 1
221258_s_at	0.032	0.000606	4.58412	-0.05296	1.26868	KIF18A	kinesin family member 18A
221245_s_at	0.032	0.000608	4.5824	-0.0558	1.97821	FZD5	frizzled class receptor 5
221437_s_at	0.032	0.00061	4.58081	-0.05843	0.822506	MRPS15	mitochondrial ribosomal protein S15
205613_at	0.032	0.000611	4.5801	-0.0596	1.44832	SYT17	synaptotagmin 17
204717_s_at	0.032	0.000611	4.5799	-0.05994	1.07155	SLC29A2	solute carrier family 29 member 2
203219_s_at	0.032	0.000612	4.57918	-0.06113	0.874752	APRT	adenine phosphoribosyltransferase
217772_s_at	0.032	0.000613	4.57776	-0.06347	1.12375	MTCH2	mitochondrial carrier 2
209529_at	0.032	0.000617	4.57402	-0.06967	1.58555	PLPP2	phospholipid phosphatase 2
216745_x_at	0.032	0.000618	-4.57349	-0.07056	-0.684383
208804_s_at	0.032	0.000618	-4.57342	-0.07066	-0.723409	SRSF6	serine and arginine rich splicing factor 6
52837_at	0.032	0.000618	-4.57305	-0.07128	-3.1507	KIAA1644	KIAA1644
210073_at	0.032	0.000622	-4.56948	-0.0772	-1.02385	ST8SIA1	ST8 alpha-N-acetyl-neuraminide alpha-2,8-sialyltransferase 1
204182_s_at	0.032	0.000623	-4.5689	-0.07816	-1.08848	ZBTB43	zinc finger and BTB domain containing 43
213437_at	0.032	0.000624	-4.56804	-0.07959	-0.917771	RUFY3	RUN and FYVE domain containing 3
208968_s_at	0.032	0.000624	4.56785	-0.07989	0.801608	CIAPIN1	cytokine induced apoptosis inhibitor 1
212982_at	0.0321	0.000627	-4.56521	-0.08427	-1.19485	ZDHHC17	zinc finger DHHC-type containing 17
211732_x_at	0.0321	0.000629	-4.56295	-0.08802	-1.24347	HNMT	histamine N-methyltransferase
219990_at	0.0321	0.000632	4.56039	-0.09226	1.92126	E2F8	E2F transcription factor 8
219894_at	0.0321	0.000633	-4.55948	-0.09377	-1.01838	MAGEL2	MAGE family member L2
201318_s_at	0.0321	0.000633	4.5594	-0.09391	0.539273	MYL12B///MYL12A	myosin light chain 12B///myosin light chain 12A
220647_s_at	0.0322	0.000637	4.55635	-0.09896	0.581933	COA4	cytochrome c oxidase assembly factor 4 homolog
218573_at	0.0323	0.00064	-4.55315	-0.10427	-1.69347	MAGEH1	MAGE family member H1
202282_at	0.0326	0.000647	4.54704	-0.11441	0.643267	HSD17B10	hydroxysteroid 17-beta dehydrogenase 10
202712_s_at	0.0326	0.000649	4.54497	-0.11785	2.25619	CKMT1A///CKMT1B	creatine kinase, mitochondrial 1A///creatine kinase, mitochondrial 1B
205633_s_at	0.0326	0.00065	4.54413	-0.11924	0.918697	ALAS1	5'-aminolevulinate synthase 1
209981_at	0.0326	0.000652	-4.54312	-0.12091	-1.87266	CSDC2	cold shock domain containing C2
217834_s_at	0.033	0.00066	4.53551	-0.13355	1.23393	SYNCRIP	synaptotagmin binding cytoplasmic RNA interacting protein
204742_s_at	0.033	0.000662	-4.53404	-0.13599	-1.45261	PDS5B	PDS5 cohesin associated factor B
217969_at	0.0331	0.000666	-4.53019	-0.1424	-0.771101	VPS51	VPS51, GARP complex subunit
209622_at	0.0334	0.000674	4.52409	-0.15254	0.925283	STK16	serine/threonine kinase 16
215628_x_at	0.0335	0.000677	-4.52111	-0.1575	-0.691573
208614_s_at	0.0335	0.000678	-4.52029	-0.15887	-0.784643	FLNB	filamin B
221964_at	0.0337	0.000683	-4.51599	-0.16601	-0.598823	TULP3	tubby like protein 3
201043_s_at	0.0337	0.000684	4.51513	-0.16744	1.21384	ANP32A	acidic nuclear phosphoprotein 32 family member A
207120_at	0.0337	0.000691	-4.50986	-0.17622	-1.34638	ZNF667	zinc finger protein 667
205164_at	0.0337	0.000693	4.50752	-0.18011	0.853123	GCAT	glycine C-acetyltransferase
205878_at	0.0337	0.000695	-4.50642	-0.18195	-1.24639	POU6F1	POU class 6 homeobox 1
218920_at	0.0337	0.000697	-4.50497	-0.18436	-0.752622	FAM193B	family with sequence similarity 193 member B
203198_at	0.0337	0.000697	-4.50464	-0.18491	-0.597678	CDK9	cyclin dependent kinase 9
218893_at	0.0337	0.000697	4.50449	-0.18517	0.796699	ISOC2	isochorismatase domain containing 2
202565_s_at	0.0337	0.000697	-4.50445	-0.18523	-1.90933	SVIL	supervillin
215474_at	0.0337	0.0007	-4.5024	-0.18864	-1.08598
218890_x_at	0.0337	0.0007	4.50215	-0.18906	0.800661	MRPL35	mitochondrial ribosomal protein L35
218263_s_at	0.0337	0.0007	-4.50201	-0.1893	-0.941716	ZBED5	zinc finger BED-type containing 5
201020_at	0.0338	0.000703	4.4994	-0.19365	0.858169	YWHAH	tyrosine 3-monooxygenase/tryptophan 5-monooxygenase activation protein eta
202593_s_at	0.0338	0.000705	4.49813	-0.19575	1.21542	GDE1	glycerophosphodiester phosphodiesterase 1
209192_x_at	0.0338	0.000709	-4.49512	-0.20077	-0.603272	KAT5	lysine acetyltransferase 5
204817_at	0.0338	0.00071	4.49446	-0.20187	1.26765	ESPL1	extra spindle pole bodies like 1, separase
44146_at	0.0339	0.000713	-4.49183	-0.20626	-0.442418	GMEB2	glucocorticoid modulatory element binding protein 2
219715_s_at	0.034	0.000717	4.48844	-0.21191	0.9908	TDP1	tyrosyl-DNA phosphodiesterase 1
208540_x_at	0.034	0.000718	4.48803	-0.2126	1.44066
212206_s_at	0.0341	0.000722	-4.48479	-0.218	-0.758726	H2AFV	H2A histone family member V
212400_at	0.0341	0.000724	-4.48268	-0.22152	-0.698405	FAM102A	family with sequence similarity 102 member A
214005_at	0.0341	0.000728	4.47989	-0.22618	0.969571	GGCX	gamma-glutamyl carboxylase
206601_s_at	0.0341	0.000732	-4.47659	-0.23168	-1.39803	LOC401021///HOXD4///HOXD3	uncharacterized LOC401021///homeobox D4///homeobox D3
212505_s_at	0.0341	0.000735	-4.47437	-0.23539	-0.704113	MAU2	MAU2 sister chromatid cohesion factor
215091_s_at	0.0341	0.000737	4.47263	-0.23829	0.946158	GTF3A	general transcription factor IIIA
202031_s_at	0.0341	0.000738	-4.47218	-0.23904	-0.525655	WIPI2	WD repeat domain, phosphoinositide interacting 2
208990_s_at	0.0341	0.000738	-4.47198	-0.23938	-0.878808	HNRNPH3	heterogeneous nuclear ribonucleoprotein H3
219907_at	0.0341	0.000739	-4.4714	-0.24035	-0.834586	FRS3	fibroblast growth factor receptor substrate 3
205711_x_at	0.0341	0.000741	4.47014	-0.24245	0.591503	ATP5C1	ATP synthase, H+ transporting, mitochondrial F1 complex, gamma polypeptide 1
203272_s_at	0.0341	0.000743	4.46839	-0.24538	0.600612	TUSC2	tumor suppressor candidate 2
213122_at	0.0341	0.000745	-4.46688	-0.2479	-2.40486	TSPYL5	TSPY like 5
217938_s_at	0.0341	0.000745	4.46654	-0.24846	0.786515	KCMF1	potassium channel modulatory factor 1
217100_s_at	0.0341	0.000745	-4.46654	-0.24846	-1.40419	UBXN7	UBX domain protein 7
209091_s_at	0.0341	0.000746	4.46576	-0.24977	0.898819	SH3GLB1	SH3 domain containing GRB2 like endophilin B1
221262_s_at	0.0341	0.000747	-4.46538	-0.25041	-0.702966	SLC2A11	solute carrier family 2 member 11
219555_s_at	0.0341	0.000747	4.4653	-0.25054	1.52156	CENPN	centromere protein N
217165_x_at	0.0341	0.000749	4.46397	-0.25276	1.75397	MT1F	metallothionein 1F
203861_s_at	0.0341	0.000749	-4.4636	-0.25338	-0.941148	ACTN2	actinin alpha 2
217643_x_at	0.0344	0.000759	-4.45615	-0.26583	-1.71845
203040_s_at	0.0344	0.00076	4.45544	-0.26703	1.23639	HMBS	hydroxymethylbilane synthase
215375_x_at	0.0344	0.000761	-4.45488	-0.26796	-1.0072	LRRFIP1	LRR binding FLII interacting protein 1
208905_at	0.0344	0.000764	4.45232	-0.27224	0.969182	CYCS	cytochrome c, somatic
212130_x_at	0.0344	0.000768	-4.44979	-0.27646	-0.583565	EIF1	eukaryotic translation initiation factor 1
201144_s_at	0.0344	0.000769	4.44871	-0.27828	0.67237	EIF2S1	eukaryotic translation initiation factor 2 subunit alpha
202093_s_at	0.0344	0.000769	-4.44868	-0.27833	-0.468388	PAF1	PAF1 homolog, Paf1/RNA polymerase II complex component
203919_at	0.0344	0.00077	-4.44783	-0.27974	-0.96883	TCEA2	transcription elongation factor A2
202021_x_at	0.0344	0.000771	-4.44743	-0.28041	-0.593733	EIF1	eukaryotic translation initiation factor 1
219685_at	0.0344	0.000771	-4.44695	-0.28123	-1.46455	TMEM35A	transmembrane protein 35A
201188_s_at	0.0345	0.000779	4.44172	-0.28998	1.81431	ITPR3	inositol 1,4,5-trisphosphate receptor type 3
214802_at	0.0345	0.000779	-4.44142	-0.29047	-0.849235	EXOC7	exocyst complex component 7
216766_at	0.0345	0.000779	-4.44138	-0.29054	-1.40735
210524_x_at	0.0345	0.000784	4.43746	-0.2971	1.67616
208190_s_at	0.0345	0.000786	4.43627	-0.2991	1.34442	LSR	lipolysis stimulated lipoprotein receptor
205046_at	0.0345	0.000787	4.43556	-0.30028	1.4945	CENPE	centromere protein E
212449_s_at	0.0345	0.000787	4.43531	-0.3007	1.64337	LYPLA1	lysophospholipase I
208799_at	0.0345	0.000788	4.43518	-0.30093	0.587616	PSMB5	proteasome subunit beta 5
206874_s_at	0.0345	0.000788	-4.43501	-0.30121	-1.13912	SLK	STE20 like kinase
218403_at	0.0345	0.000789	4.43407	-0.30278	0.86542	TRIAP1	TP53 regulated inhibitor of apoptosis 1
209348_s_at	0.0345	0.000791	-4.43282	-0.30488	-1.75194	MAF	MAF bZIP transcription factor
203307_at	0.0345	0.000792	-4.43206	-0.30615	-0.502609	GNL1	G protein nucleolar 1 (putative)
203371_s_at	0.0346	0.000795	4.42992	-0.30974	0.73981	NDUFB3	NADH:ubiquinone oxidoreductase subunit B3
219980_at	0.0346	0.000798	-4.4275	-0.31379	-0.857922	ABHD18	abhydrolase domain containing 18
201629_s_at	0.0346	0.000799	4.42708	-0.31448	1.11497	ACP1	acid phosphatase 1, soluble
202652_at	0.0346	0.000801	-4.42585	-0.31656	-1.2597	APBB1	amyloid beta precursor protein binding family B member 1
209408_at	0.0347	0.000804	4.42359	-0.32034	1.70935	KIF2C	kinesin family member 2C
201202_at	0.0347	0.000806	4.42223	-0.32262	1.16789	PCNA	proliferating cell nuclear antigen
219573_at	0.0347	0.000811	4.41867	-0.32859	1.46103	CARMIL1	capping protein regulator and myosin 1 linker 1
214078_at	0.0347	0.000811	-4.41832	-0.32917	-1.9016	PAK3	p21 (RAC1) activated kinase 3
212234_at	0.0347	0.000812	-4.41821	-0.32935	-0.82093	ASXL1	additional sex combs like 1, transcriptional regulator
217910_x_at	0.0347	0.000814	4.41684	-0.33166	0.57925	MLX	MLX, MAX dimerization protein
210385_s_at	0.0347	0.000814	4.41659	-0.33208	1.36428	ERAP1	endoplasmic reticulum aminopeptidase 1
218027_at	0.0347	0.000817	4.41434	-0.33586	1.01851	MRPL15	mitochondrial ribosomal protein L15
219432_at	0.0347	0.000821	-4.41159	-0.34046	-1.26162	EVC	EvC ciliary complex subunit 1
205687_at	0.0347	0.000826	4.4082	-0.34616	0.738913	UBFD1	ubiquitin family domain containing 1
212736_at	0.0347	0.000826	-4.4079	-0.34666	-1.69625	C16orf45	chromosome 16 open reading frame 45
204706_at	0.0347	0.000827	-4.40736	-0.34756	-0.731113	INPP5E	inositol polyphosphate-5-phosphatase E
216221_s_at	0.0347	0.000828	-4.40699	-0.34819	-0.633698	PUM2	pumilio RNA binding family member 2
215162_at	0.0347	0.000828	-4.40695	-0.34825	-0.849063	RALGAPA1	Ral GTPase activating protein catalytic alpha subunit 1
203984_s_at	0.0347	0.000828	-4.40654	-0.34894	-0.747991	CASP9	caspase 9
215630_at	0.0347	0.000831	-4.40494	-0.35163	-0.976943
218663_at	0.0347	0.000832	4.40431	-0.35268	1.37716	NCAPG	non-SMC condensin I complex subunit G
210715_s_at	0.0347	0.000834	4.40261	-0.35553	1.81882	SPINT2	serine peptidase inhibitor, Kunitz type 2
213381_at	0.0347	0.000835	-4.40239	-0.35591	-1.43282	VSTM4	V-set and transmembrane domain containing 4
219392_x_at	0.0347	0.000835	-4.40224	-0.35615	-0.78087	PRR11	proline rich 11
209452_s_at	0.0347	0.000835	4.40201	-0.35654	0.494257	VTI1B	vesicle transport through interaction with t-SNAREs 1B
207705_s_at	0.0347	0.000836	-4.40163	-0.35718	-1.47671	NINL	ninein like
212163_at	0.0348	0.00084	-4.39896	-0.36166	-1.13361	KIDINS220	kinase D-interacting substrate 220kDa
215811_at	0.0348	0.000842	-4.39747	-0.36418	-1.64317
218928_s_at	0.0348	0.000843	4.39645	-0.36589	1.51879	SLC37A1	solute carrier family 37 member 1
218726_at	0.0349	0.000848	4.39318	-0.37137	1.46664	HJURP	Holliday junction recognition protein
212807_s_at	0.0349	0.00085	4.39209	-0.37321	0.937371	SORT1	sortilin 1
200078_s_at	0.0349	0.000854	4.3892	-0.37807	0.723796	ATP6V0B	ATPase H+ transporting V0 subunit b
206088_at	0.0349	0.000855	-4.38875	-0.37882	-1.44351	LRRC37A3	leucine rich repeat containing 37 member A3
216109_at	0.0349	0.000855	-4.38854	-0.37917	-1.0231	MED13L	mediator complex subunit 13 like
200638_s_at	0.0349	0.000856	4.38837	-0.37946	0.80873	YWHAZ	tyrosine 3-monooxygenase/tryptophan 5-monooxygenase activation protein zeta
212427_at	0.0349	0.000856	-4.38778	-0.38045	-1.52761	KIAA0368	KIAA0368
208498_s_at	0.0349	0.00086	-4.38563	-0.38406	-1.62843	ACTG1P4///AMY2B///AMY2A///AMY1C///AMY1B///AMY1A	actin gamma 1 pseudogene 4///amylase, alpha 2B (pancreatic)///amylase, alpha 2A (pancreatic)///amylase, alpha 1C (salivary)///amylase, alpha 1B (salivary)///amylase, alpha 1A (salivary)
212605_s_at	0.0349	0.000862	-4.38431	-0.38629	-1.30721	NUDT3	nudix hydrolase 3
204168_at	0.0349	0.000862	4.38383	-0.38709	1.15717	MGST2	microsomal glutathione S-transferase 2
210087_s_at	0.0349	0.000863	4.38356	-0.38755	1.05258	MPZL1	myelin protein zero like 1
219913_s_at	0.0351	0.00087	-4.37894	-0.39532	-0.705398	CRNKL1	crooked neck pre-mRNA splicing factor 1
220966_x_at	0.0351	0.000871	4.37821	-0.39654	0.766502	ARPC5L	actin related protein 2/3 complex subunit 5 like
210675_s_at	0.0351	0.000874	-4.3762	-0.39992	-2.07181	PTPRR	protein tyrosine phosphatase, receptor type R
205006_s_at	0.0351	0.000875	-4.37558	-0.40096	-1.15644	NMT2	N-myristoyltransferase 2
218681_s_at	0.0353	0.000881	4.37161	-0.40764	1.12996	SDF2L1	stromal cell derived factor 2 like 1
209231_s_at	0.0353	0.000882	4.37123	-0.40829	0.700516	DCTN5	dynactin subunit 5
204421_s_at	0.0353	0.000883	-4.37053	-0.40947	-1.50716	FGF2	fibroblast growth factor 2
202779_s_at	0.0353	0.000886	4.36857	-0.41275	1.29068	UBE2S	ubiquitin conjugating enzyme E2 S
218312_s_at	0.0353	0.000887	-4.3682	-0.41338	-1.59823	ZSCAN18	zinc finger and SCAN domain containing 18
220898_at	0.0353	0.000891	-4.36534	-0.4182	-1.19319
204851_s_at	0.0353	0.000892	-4.36469	-0.41929	-2.32194	DCX	doublecortin
219015_s_at	0.0353	0.000893	4.36433	-0.4199	0.789332	ALG13	ALG13, UDP-N-acetylglucosaminyltransferase subunit
215582_x_at	0.0354	0.000899	-4.36071	-0.426	-0.590051	MCM3AP	minichromosome maintenance complex component 3 associated protein
208290_s_at	0.0354	0.000899	4.36064	-0.42611	0.712381	EIF5	eukaryotic translation initiation factor 5
205394_at	0.0355	0.000902	4.35862	-0.42952	1.68	CHEK1	checkpoint kinase 1
220690_s_at	0.0355	0.000907	4.3557	-0.43443	0.65407	DHRS7B	dehydrogenase/reductase 7B
222029_x_at	0.0355	0.000911	4.35293	-0.4391	0.668826	MIR6834///PFDN6	microRNA 6834///prefoldin subunit 6
217293_at	0.0355	0.000911	-4.35271	-0.43948	-0.584905
203454_s_at	0.0355	0.000912	4.35237	-0.44004	0.757778	ATOX1	antioxidant 1 copper chaperone
218326_s_at	0.0355	0.000912	4.35216	-0.44041	1.46229	LGR4	leucine rich repeat containing G protein-coupled receptor 4
208680_at	0.0355	0.000912	4.35204	-0.4406	0.873057	PRDX1	peroxiredoxin 1
216197_at	0.0355	0.000913	-4.35148	-0.44154	-0.844433
206723_s_at	0.0357	0.000922	4.34641	-0.45009	0.9629	LPAR2	lysophosphatidic acid receptor 2
211276_at	0.0357	0.000925	-4.34449	-0.45333	-2.93852	TCEAL2	transcription elongation factor A like 2
202941_at	0.0357	0.000925	4.34422	-0.45379	0.625096	NDUFV2	NADH:ubiquinone oxidoreductase core subunit V2
210101_x_at	0.0357	0.000926	4.34378	-0.45452	0.807913	SH3GLB1	SH3 domain containing GRB2 like endophilin B1
204845_s_at	0.0362	0.000938	-4.33642	-0.46695	-2.0818	ENPEP	glutamyl aminopeptidase
200650_s_at	0.0362	0.00094	4.33537	-0.46872	1.51634	LDHA	lactate dehydrogenase A
220720_x_at	0.0362	0.000942	-4.33398	-0.47106	-0.925227	MZT2B	mitotic spindle organizing protein 2B
211592_s_at	0.0363	0.000946	-4.33152	-0.47521	-0.859495	CACNA1C	calcium voltage-gated channel subunit alpha1 C
218046_s_at	0.0363	0.00095	4.32932	-0.47893	0.740693	MRPS16	mitochondrial ribosomal protein S16
217755_at	0.0363	0.000951	4.32866	-0.48004	2.22802	HN1	hematological and neurological expressed 1
202852_s_at	0.0365	0.000956	4.3258	-0.48488	0.616526	AAGAB	alpha- and gamma-adaptin binding protein
212695_at	0.0365	0.00096	-4.32341	-0.48891	-0.935335	CRY2	cryptochrome circadian clock 2
201541_s_at	0.0365	0.000961	4.32285	-0.48985	0.45665	ZNHIT1	zinc finger HIT-type containing 1
202617_s_at	0.0365	0.000962	-4.32209	-0.49113	-1.19211	MECP2	methyl-CpG binding protein 2
216472_at	0.0365	0.000965	-4.32073	-0.49343	-0.961482
203713_s_at	0.0365	0.000967	4.31961	-0.49532	1.56098	LLGL2	LLGL2, scribble cell polarity complex component
215521_at	0.0365	0.000971	-4.31727	-0.49927	-0.696986	PHC3	polyhomeotic homolog 3
204709_s_at	0.0365	0.000971	4.31702	-0.4997	1.41413	KIF23	kinesin family member 23
204641_at	0.0365	0.000973	4.3158	-0.50176	1.9723	NEK2	NIMA related kinase 2
204769_s_at	0.0365	0.000976	4.31407	-0.50469	1.43867	TAP2	transporter 2, ATP binding cassette subfamily B member
219664_s_at	0.0365	0.000976	4.31388	-0.50501	0.590069	DECR2	2,4-dienoyl-CoA reductase 2, peroxisomal
202697_at	0.0365	0.000976	4.31385	-0.50505	1.10863	NUDT21	nudix hydrolase 21
209520_s_at	0.0365	0.000979	4.31219	-0.50787	0.951577	NCBP1	nuclear cap binding protein subunit 1
201212_at	0.0365	0.00098	4.31171	-0.50867	1.12109	LGMN	legumain
213407_at	0.0365	0.000982	-4.3106	-0.51055	-1.17931	PHLPP2	PH domain and leucine rich repeat protein phosphatase 2
203780_at	0.0365	0.000982	4.31058	-0.51058	2.49464	MPZL2	myelin protein zero like 2
203806_s_at	0.0366	0.000986	4.3084	-0.51427	1.08669	FANCA	Fanconi anemia complementation group A
200810_s_at	0.0366	0.000988	-4.30745	-0.51588	-1.35202	CIRBP	cold inducible RNA binding protein
206792_x_at	0.0367	0.00099	-4.30588	-0.51854	-0.648711	LOC729966///PDE4C	uncharacterized LOC729966///phosphodiesterase 4C
218308_at	0.0367	0.000993	4.30447	-0.52092	1.39321	TACC3	transforming acidic coiled-coil containing protein 3
214988_s_at	0.0367	0.000995	-4.3032	-0.52307	-0.574637	SON	SON DNA binding protein
38158_at	0.0368	0.001	4.30053	-0.52757	1.35545	ESPL1	extra spindle pole bodies like 1, separase
208910_s_at	0.0368	0.001	4.30029	-0.52798	1.06995	C1QBP	complement C1q binding protein
208967_s_at	0.0368	0.001	4.299	-0.53016	0.793896	AK2	adenylate kinase 2
202090_s_at	0.0368	0.00101	4.29638	-0.53459	0.656974	UQCR11	ubiquinol-cytochrome c reductase, complex III subunit XI
207263_x_at	0.0368	0.00101	-4.29635	-0.53465	-0.742135	VEZT	vezatin, adherens junctions transmembrane protein
217615_at	0.0368	0.00101	-4.29616	-0.53497	-0.603768
203039_s_at	0.0368	0.00101	4.29579	-0.5356	0.803828	NDUFS1	NADH:ubiquinone oxidoreductase core subunit S1
204844_at	0.0368	0.00101	-4.29419	-0.5383	-2.40316	ENPEP	glutamyl aminopeptidase
212344_at	0.0368	0.00101	4.29415	-0.53837	1.94517	SULF1	sulfatase 1
222099_s_at	0.0369	0.00102	-4.29032	-0.54486	-0.479738	LSM14A	LSM14A, mRNA processing body assembly factor
210144_at	0.0369	0.00102	-4.28944	-0.54634	-0.645462	TBC1D22A	TBC1 domain family member 22A
218897_at	0.0369	0.00102	4.28671	-0.55097	0.963027	TMEM177	transmembrane protein 177
208870_x_at	0.0369	0.00103	4.28642	-0.55146	0.602922	ATP5C1	ATP synthase, H+ transporting, mitochondrial F1 complex, gamma polypeptide 1
40016_g_at	0.0369	0.00103	-4.2861	-0.55201	-1.06363	MAST4	microtubule associated serine/threonine kinase family member 4
209679_s_at	0.0369	0.00103	4.28588	-0.55237	1.61474	SMAGP	small cell adhesion glycoprotein
215942_s_at	0.0369	0.00103	4.28557	-0.5529	0.951307	GTSE1	G2 and S-phase expressed 1
204169_at	0.037	0.00103	4.28351	-0.55639	0.727543	IMPDH1	inosine monophosphate dehydrogenase 1
202830_s_at	0.037	0.00103	4.28266	-0.55783	0.742044	SLC37A4	solute carrier family 37 member 4
213422_s_at	0.0372	0.00104	-4.27795	-0.56581	-1.78216	MXRA8	matrix remodeling associated 8
212549_at	0.0373	0.00105	-4.27529	-0.57031	-1.23003	STAT5B	signal transducer and activator of transcription 5B
202690_s_at	0.0378	0.00106	4.26731	-0.58385	0.907212	SNRPD1	small nuclear ribonucleoprotein D1 polypeptide
213476_x_at	0.0378	0.00106	4.26614	-0.58583	0.618756	TUBB3	tubulin beta 3 class III
219360_s_at	0.0378	0.00107	4.2649	-0.58792	1.37729	TRPM4	transient receptor potential cation channel subfamily M member 4
213394_at	0.0378	0.00107	-4.26435	-0.58886	-0.754861	MAPKBP1	mitogen-activated protein kinase binding protein 1
203007_x_at	0.0378	0.00107	4.26233	-0.59228	1.50257	LYPLA1	lysophospholipase I
208137_x_at	0.0378	0.00107	-4.26124	-0.59414	-0.699808	ZNF611	zinc finger protein 611
218563_at	0.0378	0.00107	4.26093	-0.59466	0.601143	NDUFA3	NADH:ubiquinone oxidoreductase subunit A3
208469_s_at	0.0378	0.00108	-4.25885	-0.5982	-0.958231	PPT2-EGFL8///EGFL8///PPT2	PPT2-EGFL8 readthrough (NMD candidate)///EGF like domain multiple 8///palmitoyl-protein thioesterase 2
212227_x_at	0.0378	0.00108	-4.25854	-0.59872	-0.613831	EIF1	eukaryotic translation initiation factor 1
221901_at	0.0378	0.00108	-4.25801	-0.59961	-2.50993	KIAA1644	KIAA1644
220855_at	0.0378	0.00108	-4.25593	-0.60314	-0.661061	CLTC-IT1	CLTC intronic transcript 1 (non-protein coding)
208923_at	0.0378	0.00108	4.25581	-0.60334	0.555557	CYFIP1	cytoplasmic FMR1 interacting protein 1
204461_x_at	0.0378	0.00108	-4.25573	-0.60349	-0.718851	RAD1	RAD1 checkpoint DNA exonuclease
208787_at	0.0378	0.00108	4.25521	-0.60437	0.916138	MRPL3	mitochondrial ribosomal protein L3
214129_at	0.0378	0.00108	4.25516	-0.60445	1.10251	LOC101930416///LOC101929792///LOC100996724///PDE4DIP	myomegalin-like///uncharacterized LOC101929792///phosphodiesterase 4D interacting protein-like///phosphodiesterase 4D interacting protein
220144_s_at	0.0378	0.00109	4.25417	-0.60612	1.03128	ANKEF1	ankyrin repeat and EF-hand domain containing 1
218183_at	0.0378	0.00109	-4.25303	-0.60806	-1.17717	CDIP1	cell death inducing p53 target 1
209036_s_at	0.0378	0.00109	4.25292	-0.60825	0.813815	MDH2	malate dehydrogenase 2
207157_s_at	0.0379	0.0011	4.24947	-0.61411	0.63174	GNG5	G protein subunit gamma 5
201339_s_at	0.038	0.0011	4.24678	-0.61869	0.796387	SCP2	sterol carrier protein 2
210268_at	0.038	0.0011	-4.24623	-0.61961	-0.868042	NFX1	nuclear transcription factor, X-box binding 1
215645_at	0.0381	0.00111	-4.2445	-0.62256	-1.05586	FLCN	folliculin
202861_at	0.0382	0.00111	-4.24088	-0.6287	-1.03045	MIR6883///PER1	microRNA 6883///period circadian clock 1
212131_at	0.0382	0.00111	-4.24064	-0.6291	-0.674095	LSM14A	LSM14A, mRNA processing body assembly factor
216081_at	0.0382	0.00111	-4.23962	-0.63084	-1.79605	LAMA4	laminin subunit alpha 4
203570_at	0.0382	0.00111	4.23949	-0.63105	1.32817	LOXL1	lysyl oxidase like 1
204695_at	0.0382	0.00112	4.23813	-0.63337	1.26836	CDC25A	cell division cycle 25A
217769_s_at	0.0383	0.00112	4.23628	-0.63652	0.554424	POMP	proteasome maturation protein
200734_s_at	0.0383	0.00112	4.23453	-0.63949	1.15682	ARF3	ADP ribosylation factor 3
213939_s_at	0.0383	0.00113	-4.23411	-0.6402	-1.26515	RUFY3	RUN and FYVE domain containing 3
201673_s_at	0.0384	0.00113	4.2326	-0.64276	0.831828	GYS1	glycogen synthase 1
212801_at	0.0384	0.00113	4.23179	-0.64415	1.05034	MIR1178///CIT	microRNA 1178///citron rho-interacting serine/threonine kinase
203397_s_at	0.0384	0.00113	4.23101	-0.64547	2.46231	GALNT3	polypeptide N-acetylgalactosaminyltransferase 3
218425_at	0.0384	0.00113	-4.23	-0.64719	-0.884508	RNF216	ring finger protein 216
210958_s_at	0.0385	0.00114	-4.22739	-0.65163	-0.845536	MAST4	microtubule associated serine/threonine kinase family member 4
204568_at	0.0388	0.00115	-4.22276	-0.6595	-1.017	ATG14	autophagy related 14
218622_at	0.039	0.00116	4.21914	-0.66565	0.807821	NUP37	nucleoporin 37
205433_at	0.039	0.00116	-4.21725	-0.66887	-3.21318	BCHE	butyrylcholinesterase
213401_s_at	0.0391	0.00116	-4.21502	-0.67266	-1.00908	TBL1X	transducin (beta)-like 1X-linked
215766_at	0.0394	0.00118	-4.20982	-0.68151	-0.638013	GSTA1	glutathione S-transferase alpha 1
214264_s_at	0.0398	0.00119	4.20377	-0.69182	1.24349	EFCAB11	EF-hand calcium binding domain 11
222193_at	0.0398	0.00119	-4.20333	-0.69257	-0.899577	LDAH	lipid droplet associated hydrolase
203736_s_at	0.0398	0.00119	4.20282	-0.69344	0.649615	PPFIBP1	PPFIA binding protein 1
214805_at	0.0401	0.0012	-4.19735	-0.70275	-0.911434	SNORD10///SNORA48///SNORA67///EIF4A1	small nucleolar RNA, C/D box 10///small nucleolar RNA, H/ACA box 48///small nucleolar RNA, H/ACA box 67///eukaryotic translation initiation factor 4A1
208246_x_at	0.0401	0.00121	-4.19528	-0.70628	-0.775216
212212_s_at	0.0401	0.00121	-4.19511	-0.70657	-0.461261	INTS1	integrator complex subunit 1
221626_at	0.0402	0.00121	-4.1927	-0.71068	-1.15204	ZNF506	zinc finger protein 506
202094_at	0.0402	0.00121	4.19245	-0.71111	1.23362	BIRC5	baculoviral IAP repeat containing 5
201231_s_at	0.0403	0.00122	4.19075	-0.71399	1.3502	ENO1	enolase 1
213066_at	0.0404	0.00123	-4.1869	-0.72056	-0.795964	RUSC2	RUN and SH3 domain containing 2
212061_at	0.0404	0.00123	-4.18645	-0.72132	-0.96863	U2SURP	U2 snRNP associated SURP domain containing
216724_at	0.0404	0.00123	-4.18583	-0.72239	-0.614817	DCLK2	doublecortin like kinase 2
202961_s_at	0.0404	0.00123	4.18541	-0.72311	0.883515	ARMC2-AS1///ATP5J2	ARMC2 antisense RNA 1///ATP synthase, H+ transporting, mitochondrial Fo complex subunit F2
211776_s_at	0.0404	0.00123	-4.18509	-0.72365	-1.03583	EPB41L3	erythrocyte membrane protein band 4.1 like 3
208478_s_at	0.0404	0.00123	4.18299	-0.72724	1.25273	BAX	BCL2 associated X, apoptosis regulator
218435_at	0.0404	0.00123	4.18244	-0.72817	1.70598	DNAJC15	DnaJ heat shock protein family (Hsp40) member C15
215069_at	0.0404	0.00124	-4.18145	-0.72985	-1.48152	NMT2	N-myristoyltransferase 2
201869_s_at	0.0404	0.00124	-4.18045	-0.73156	-2.28851	TBL1X	transducin (beta)-like 1X-linked
212843_at	0.0404	0.00124	-4.18014	-0.73209	-3.40925	NCAM1	neural cell adhesion molecule 1
218041_x_at	0.0405	0.00125	-4.17702	-0.73741	-0.827986	SLC38A2	solute carrier family 38 member 2
203318_s_at	0.0405	0.00125	-4.17643	-0.73843	-0.690233	ZNF148	zinc finger protein 148
205604_at	0.0405	0.00125	-4.17631	-0.73862	-1.79767	HOXD9	homeobox D9
202087_s_at	0.0405	0.00125	-4.17401	-0.74254	-0.887582	CTSL	cathepsin L
203418_at	0.0405	0.00125	4.17362	-0.74322	1.57152	CCNA2	cyclin A2
212468_at	0.0405	0.00126	-4.17173	-0.74643	-1.0803	SPAG9	sperm associated antigen 9
209142_s_at	0.0405	0.00126	4.1715	-0.74683	0.722162	UBE2G1	ubiquitin conjugating enzyme E2 G1
212614_at	0.0405	0.00126	-4.17139	-0.74702	-1.14387	ARID5B	AT-rich interaction domain 5B
202640_s_at	0.0405	0.00126	-4.17099	-0.74771	-0.462605	RANBP3	RAN binding protein 3
204949_at	0.0405	0.00126	4.17054	-0.74847	0.836226	ICAM3	intercellular adhesion molecule 3
217830_s_at	0.0405	0.00126	-4.17051	-0.74853	-0.770006	NSFL1C	NSFL1 cofactor
201597_at	0.0405	0.00127	4.16869	-0.75163	0.608205	COX7A2	cytochrome c oxidase subunit 7A2
216187_x_at	0.0405	0.00127	-4.16861	-0.75177	-0.767061
218180_s_at	0.0405	0.00127	4.1668	-0.75485	1.5286	EPS8L2	EPS8 like 2
207255_at	0.0405	0.00127	-4.16675	-0.75495	-0.734002	LEPROT///LEPR	leptin receptor overlapping transcript///leptin receptor
202409_at	0.0406	0.00127	-4.16505	-0.75784	-3.01133	INS-IGF2///IGF2	INS-IGF2 readthrough///insulin like growth factor 2
208308_s_at	0.0407	0.00128	4.16233	-0.76249	1.10232	GPI	glucose-6-phosphate isomerase
221081_s_at	0.0407	0.00128	4.16173	-0.76352	1.66349	DENND2D	DENN domain containing 2D
204649_at	0.0407	0.00128	4.16103	-0.76471	1.31124	TROAP	trophinin associated protein
201317_s_at	0.0409	0.00129	4.15821	-0.76953	0.748903	PSMA2	proteasome subunit alpha 2
208659_at	0.041	0.0013	4.15493	-0.77513	0.771475	CLIC1	chloride intracellular channel 1
205541_s_at	0.041	0.0013	-4.15457	-0.77574	-1.70966	GSPT2	G1 to S phase transition 2
217356_s_at	0.041	0.0013	4.1537	-0.77722	1.56651	PGK1	phosphoglycerate kinase 1
206710_s_at	0.0411	0.0013	-4.15242	-0.77941	-1.16758	EPB41L3	erythrocyte membrane protein band 4.1 like 3
210251_s_at	0.0413	0.00131	-4.1477	-0.78748	-0.87258	RUFY3	RUN and FYVE domain containing 3
215587_x_at	0.0413	0.00132	-4.14711	-0.78849	-0.701439
207470_at	0.0413	0.00132	-4.14595	-0.79047	-0.931396
204850_s_at	0.0413	0.00132	-4.14571	-0.79089	-1.95949	DCX	doublecortin
203746_s_at	0.0413	0.00132	4.1445	-0.79295	0.759491	HCCS	holocytochrome c synthase
202112_at	0.0413	0.00132	-4.14449	-0.79296	-0.86455	VWF	von Willebrand factor
213208_at	0.0414	0.00133	-4.14175	-0.79765	-0.852807	GLTSCR1L	GLTSCR1 like
208395_s_at	0.0415	0.00133	-4.14015	-0.80039	-0.703926	URB1	URB1 ribosome biogenesis 1 homolog (S. cerevisiae)
213641_at	0.0415	0.00134	-4.1384	-0.80339	-0.87955	ZNF500	zinc finger protein 500
209639_s_at	0.0415	0.00134	-4.13819	-0.80375	-0.60529	RGS12	regulator of G-protein signaling 12
208942_s_at	0.0415	0.00134	-4.13796	-0.80414	-0.958419	SEC62	SEC62 homolog, preprotein translocation factor
217150_s_at	0.0415	0.00134	4.13728	-0.80529	0.57168	NF2	neurofibromin 2
219113_x_at	0.0417	0.00135	-4.13414	-0.81067	-0.794702	HSD17B14	hydroxysteroid 17-beta dehydrogenase 14
218511_s_at	0.0417	0.00135	4.13262	-0.81328	0.91997	PNPO	pyridoxamine 5'-phosphate oxidase
221857_s_at	0.0417	0.00135	-4.13241	-0.81363	-0.512807	TJAP1	tight junction associated protein 1
215513_at	0.0418	0.00136	-4.13064	-0.81666	-1.11093	HYMAI	hydatidiform mole associated and imprinted (non-protein coding)
211685_s_at	0.0418	0.00136	4.12906	-0.81936	1.72341	NCALD	neurocalcin delta
205522_at	0.0418	0.00136	-4.12863	-0.8201	-2.45173	HOXD4	homeobox D4
220719_at	0.0422	0.00138	-4.12225	-0.83102	-0.886593
219611_s_at	0.0422	0.00138	4.1219	-0.83162	0.644765	CEP85	centrosomal protein 85
219699_at	0.0423	0.00138	-4.11959	-0.83558	-0.835411	LGI2	leucine rich repeat LGI family member 2
208918_s_at	0.0423	0.00138	4.11948	-0.83576	0.831359	NADK	NAD kinase
217586_x_at	0.0424	0.00139	-4.11743	-0.83927	-0.883315
218142_s_at	0.0424	0.00139	-4.11603	-0.84167	-1.10138	CRBN	cereblon
201118_at	0.0425	0.0014	4.11429	-0.84465	1.50722	PGD	phosphogluconate dehydrogenase
212914_at	0.0425	0.0014	-4.11311	-0.84668	-2.21776	CBX7	chromobox 7
212708_at	0.0425	0.0014	-4.11221	-0.84821	-0.686191	MSL1	male specific lethal 1 homolog
221620_s_at	0.0425	0.0014	4.1113	-0.84978	0.877071	APOO	apolipoprotein O
215616_s_at	0.0425	0.00141	-4.11037	-0.85137	-0.665721	KDM4B	lysine demethylase 4B
218168_s_at	0.0425	0.00141	-4.11022	-0.85162	-0.960326	COQ8A	coenzyme Q8A
201463_s_at	0.0425	0.00141	4.10976	-0.85242	1.05234	TALDO1	transaldolase 1
212609_s_at	0.0425	0.00141	-4.10874	-0.85416	-1.80555	AKT3	AKT serine/threonine kinase 3
204033_at	0.0425	0.00141	4.10815	-0.85517	1.73965	TRIP13	thyroid hormone receptor interactor 13
202308_at	0.0426	0.00142	4.1062	-0.85852	0.563764	SREBF1	sterol regulatory element binding transcription factor 1
212704_at	0.0426	0.00142	-4.10443	-0.86155	-0.579559	ZCCHC11	zinc finger CCHC-type containing 11
211061_s_at	0.0426	0.00142	4.10392	-0.86243	0.672799	MGAT2	mannosyl (alpha-1,6-)-glycoprotein beta-1,2-N-acetylglucosaminyltransferase
200658_s_at	0.0427	0.00143	4.10215	-0.86545	0.729101	PHB	prohibitin
215555_at	0.0427	0.00143	-4.10011	-0.86896	-1.84967
209689_at	0.0427	0.00143	-4.09975	-0.86957	-0.658585	CCDC93	coiled-coil domain containing 93
210830_s_at	0.0427	0.00143	4.09926	-0.8704	0.91785	PON2	paraoxonase 2
213364_s_at	0.0427	0.00143	-4.09898	-0.87088	-1.392	SNX1	sorting nexin 1
200051_at	0.0427	0.00144	-4.09858	-0.87157	-0.506099	SART1	squamous cell carcinoma antigen recognized by T-cells 1
212129_at	0.0427	0.00144	4.09812	-0.87237	0.659811	NIPA2	non imprinted in Prader-Willi/Angelman syndrome 2
202580_x_at	0.0427	0.00144	4.09752	-0.87339	1.63922	FOXM1	forkhead box M1
205498_at	0.0427	0.00144	-4.09583	-0.87629	-1.82259	GHR	growth hormone receptor
210018_x_at	0.0427	0.00145	4.09474	-0.87817	1.11594	MALT1	MALT1 paracaspase
215135_at	0.0427	0.00145	-4.09458	-0.87843	-0.655961	DNPEP	aspartyl aminopeptidase
218275_at	0.0427	0.00145	4.09449	-0.87859	1.29196	SLC25A10	solute carrier family 25 member 10
200747_s_at	0.0427	0.00145	-4.09397	-0.87948	-1.06508	NUMA1	nuclear mitotic apparatus protein 1
218120_s_at	0.0427	0.00145	4.09303	-0.88109	0.847383	HMOX2	heme oxygenase 2
219791_s_at	0.0428	0.00146	-4.09044	-0.88553	-3.36079	HAND2-AS1	HAND2 antisense RNA 1 (head to head)
220071_x_at	0.0428	0.00146	-4.0895	-0.88715	-0.757759	HAUS2	HAUS augmin like complex subunit 2
214106_s_at	0.0429	0.00146	4.08822	-0.88935	1.18001	GMDS	GDP-mannose 4,6-dehydratase
32259_at	0.0432	0.00148	-4.08335	-0.8977	-1.06254	EZH1	enhancer of zeste 1 polycomb repressive complex 2 subunit
219306_at	0.0432	0.00148	4.08322	-0.89792	1.50396	KIF15	kinesin family member 15
201748_s_at	0.0432	0.00148	-4.08116	-0.90146	-0.457533	SAFB	scaffold attachment factor B
202250_s_at	0.0432	0.00148	-4.08094	-0.90184	-0.734273	DCAF8	DDB1 and CUL4 associated factor 8
220948_s_at	0.0432	0.00148	4.07999	-0.90347	1.01231	ATP1A1	ATPase Na+/K+ transporting subunit alpha 1
203707_at	0.0432	0.00149	-4.07964	-0.90406	-0.555477	LINC00921///ZNF263	long intergenic non-protein coding RNA 921///zinc finger protein 263
205780_at	0.0432	0.00149	4.07886	-0.90541	1.84861	BIK	BCL2 interacting killer
202110_at	0.0432	0.00149	4.07824	-0.90647	0.49642	COX7B	cytochrome c oxidase subunit 7B
205022_s_at	0.0433	0.00149	-4.07637	-0.90967	-1.17495	FOXN3	forkhead box N3
215438_x_at	0.0433	0.0015	4.0759	-0.91048	0.733407	GSPT1	G1 to S phase transition 1
205588_s_at	0.0433	0.0015	4.07448	-0.91292	1.08624	FGFR1OP	FGFR1 oncogene partner
210608_s_at	0.0434	0.0015	4.07273	-0.91592	1.43471	FUT2	fucosyltransferase 2
203255_at	0.0434	0.00151	-4.07201	-0.91717	-0.837502	FBXO11	F-box protein 11
216638_s_at	0.0434	0.00151	-4.07197	-0.91724	-1.09009	PRLR	prolactin receptor
216905_s_at	0.0434	0.00151	4.07002	-0.92058	2.45302	ST14	suppression of tumorigenicity 14
208872_s_at	0.0434	0.00151	4.06892	-0.92247	1.07464	REEP5	receptor accessory protein 5
211456_x_at	0.0434	0.00151	4.06889	-0.92253	1.23665	MT1HL1	metallothionein 1H-like 1
216524_x_at	0.0434	0.00152	-4.06741	-0.92506	-0.543914
206012_at	0.0434	0.00152	-4.06734	-0.92518	-3.97581	LEFTY1///LEFTY2	left-right determination factor 1///left-right determination factor 2
215600_x_at	0.0434	0.00152	-4.06715	-0.92551	-0.725616	FBXW12	F-box and WD repeat domain containing 12
201688_s_at	0.0434	0.00152	4.06692	-0.92592	2.02631	TPD52	tumor protein D52
211015_s_at	0.0436	0.00153	4.06272	-0.93313	1.08294	HSPA4	heat shock protein family A (Hsp70) member 4
208837_at	0.0436	0.00153	4.06235	-0.93377	1.08455	TMED3	transmembrane p24 trafficking protein 3
212813_at	0.0436	0.00154	-4.06051	-0.93693	-2.03904	JAM3	junctional adhesion molecule 3
56919_at	0.0436	0.00154	-4.06005	-0.93772	-0.592853	WDR48	WD repeat domain 48
214718_at	0.0436	0.00154	-4.05992	-0.93793	-1.15552	GATAD1	GATA zinc finger domain containing 1
201912_s_at	0.0438	0.00155	4.05677	-0.94335	0.956405	GSPT1	G1 to S phase transition 1
213486_at	0.0438	0.00155	-4.05641	-0.94397	-1.24262	COPG2IT1	COPG2 imprinted transcript 1 (non-protein coding)
222032_s_at	0.0441	0.00156	-4.05161	-0.95222	-0.631806	USP7	ubiquitin specific peptidase 7
204902_s_at	0.0443	0.00157	-4.0488	-0.95706	-0.614262	ATG4B	autophagy related 4B cysteine peptidase
204731_at	0.0443	0.00157	-4.04788	-0.95863	-2.89054	TGFBR3	transforming growth factor beta receptor 3
218942_at	0.0443	0.00157	4.04788	-0.95864	0.583604	PIP4K2C	phosphatidylinositol-5-phosphate 4-kinase type 2 gamma
208511_at	0.0444	0.00158	4.04502	-0.96355	0.661426	PTTG3P	pituitary tumor-transforming 3, pseudogene
205510_s_at	0.0445	0.00159	-4.04352	-0.96613	-0.802365	FLJ10038	uncharacterized protein FLJ10038
218346_s_at	0.0445	0.00159	-4.04251	-0.96787	-0.581352	SESN1	sestrin 1
206303_s_at	0.0445	0.00159	4.04243	-0.96801	0.796979	NUDT4P1///NUDT4P2///NUDT4	nudix hydrolase 4 pseudogene 1///nudix hydrolase 4 pseudogene 2///nudix hydrolase 4
208707_at	0.0445	0.00159	-4.04186	-0.96898	-0.814006	EIF5	eukaryotic translation initiation factor 5
220715_at	0.0446	0.0016	-4.0399	-0.97236	-0.597175
214096_s_at	0.0446	0.0016	4.03888	-0.97412	0.951641	SHMT2	serine hydroxymethyltransferase 2
213541_s_at	0.0446	0.0016	-4.0383	-0.97512	-1.21536	ERG	ERG, ETS transcription factor
203668_at	0.0446	0.00161	-4.03683	-0.97765	-0.517318	MAN2C1	mannosidase alpha class 2C member 1
217761_at	0.0447	0.00161	4.03599	-0.97909	0.784912	ADI1	acireductone dioxygenase 1
212022_s_at	0.0447	0.00161	4.03503	-0.98074	1.7235	MKI67	marker of proliferation Ki-67
202395_at	0.0447	0.00161	4.0337	-0.98304	0.777094	LOC101930324///NSF	uncharacterized LOC101930324///N-ethylmaleimide sensitive factor, vesicle fusing ATPase
212912_at	0.0447	0.00162	-4.03273	-0.9847	-1.27598	RPS6KA2	ribosomal protein S6 kinase A2
215588_x_at	0.0447	0.00162	-4.03228	-0.98548	-0.72538	RIOK3	RIO kinase 3
213103_at	0.0447	0.00162	-4.03034	-0.98881	-1.4391	STARD13	StAR related lipid transfer domain containing 13
218035_s_at	0.0447	0.00163	4.0299	-0.98957	2.71672	RBM47	RNA binding motif protein 47
216548_x_at	0.0447	0.00163	4.02953	-0.99022	0.791557	HMGB3P1	high mobility group box 3 pseudogene 1
203593_at	0.0447	0.00163	4.02934	-0.99054	1.25032	CD2AP	CD2 associated protein
214607_at	0.0447	0.00163	-4.02929	-0.99062	-0.860246	PAK3	p21 (RAC1) activated kinase 3
213305_s_at	0.0447	0.00163	4.02915	-0.99087	0.866427	PPP2R5C	protein phosphatase 2 regulatory subunit B'gamma
213474_at	0.0448	0.00163	-4.02709	-0.99441	-0.957796	KCTD7///RABGEF1	potassium channel tetramerization domain containing 7///RAB guanine nucleotide exchange factor 1
214604_at	0.0448	0.00164	-4.02581	-0.99662	-1.75707	HOXD11	homeobox D11
217785_s_at	0.0448	0.00164	4.0247	-0.99854	0.919528	YKT6	YKT6 v-SNARE homolog (S. cerevisiae)
202890_at	0.0448	0.00164	4.02427	-0.99927	2.02008	MAP7	microtubule associated protein 7
221591_s_at	0.0448	0.00164	4.02347	-1.00065	0.90287	FAM64A	family with sequence similarity 64 member A
217810_x_at	0.0448	0.00165	-4.02209	-1.00303	-0.609756	LARS	leucyl-tRNA synthetase
204439_at	0.0448	0.00165	4.02203	-1.00312	1.62703	IFI44L	interferon induced protein 44 like
202671_s_at	0.0448	0.00165	4.0216	-1.00386	1.3468	PDXK	pyridoxal (pyridoxine, vitamin B6) kinase
212815_at	0.0449	0.00166	4.01952	-1.00745	0.858821	ASCC3	activating signal cointegrator 1 complex subunit 3
203288_at	0.0449	0.00166	-4.01828	-1.00959	-0.725404	KIAA0355	KIAA0355
201123_s_at	0.0449	0.00166	4.01817	-1.00978	1.54098	EIF5A	eukaryotic translation initiation factor 5A
213506_at	0.0451	0.00167	4.01467	-1.01581	2.8872	F2RL1	F2R like trypsin receptor 1
217653_x_at	0.0451	0.00167	-4.01394	-1.01706	-0.861781
203189_s_at	0.0451	0.00167	4.01345	-1.0179	0.644773	MIR7113///MIR4691///NDUFS8	microRNA 7113///microRNA 4691///NADH:ubiquinone oxidoreductase core subunit S8
200729_s_at	0.0451	0.00168	4.0131	-1.01851	0.845426	ACTR2	ARP2 actin related protein 2 homolog
220319_s_at	0.0451	0.00168	-4.01266	-1.01928	-0.848884	MYLIP	myosin regulatory light chain interacting protein
215073_s_at	0.0452	0.00168	-4.01122	-1.02175	-1.55329	NR2F2	nuclear receptor subfamily 2 group F member 2
203657_s_at	0.0453	0.00169	-4.00892	-1.02571	-1.64687	CTSF	cathepsin F
216074_x_at	0.0453	0.00169	4.00802	-1.02728	1.84935	WWC1	WW and C2 domain containing 1
201762_s_at	0.0455	0.0017	4.00556	-1.0315	1.14922	MIR7703///PSME2	microRNA 7703///proteasome activator subunit 2
215883_at	0.0455	0.0017	-4.00391	-1.03435	-0.722432	CTNNA1	catenin alpha 1
220617_s_at	0.0455	0.0017	-4.00365	-1.03479	-0.811204	ZNF532	zinc finger protein 532
48117_at	0.0455	0.00171	-4.00302	-1.03589	-0.998249	SGF29	SAGA complex associated factor 29
200820_at	0.0455	0.00171	4.00263	-1.03655	0.640222	PSMD8	proteasome 26S subunit, non-ATPase 8
200916_at	0.0455	0.00171	4.00258	-1.03665	1.39951	TAGLN2	transgelin 2
34031_i_at	0.0455	0.00171	-4.00152	-1.03847	-1.10846	KRIT1	KRIT1, ankyrin repeat containing
212179_at	0.0455	0.00172	-3.99889	-1.04302	-1.31251	PNISR	PNN interacting serine and arginine rich protein
214437_s_at	0.0455	0.00172	3.99874	-1.04327	0.832747	SHMT2	serine hydroxymethyltransferase 2
203359_s_at	0.0455	0.00172	3.99844	-1.04379	1.1387	GJA9-MYCBP///MYCBP	GJA9-MYCBP readthrough///MYC binding protein
202432_at	0.0455	0.00173	-3.9969	-1.04645	-0.833004	PPP3CB	protein phosphatase 3 catalytic subunit beta
219798_s_at	0.0455	0.00173	-3.99626	-1.04756	-0.736808	MEPCE	methylphosphate capping enzyme
220215_at	0.0455	0.00173	-3.99512	-1.04951	-0.567334	ZNF669	zinc finger protein 669
213714_at	0.0455	0.00173	-3.99454	-1.05052	-2.21501	CACNB2	calcium voltage-gated channel auxiliary subunit beta 2
209971_x_at	0.0455	0.00173	3.99429	-1.05094	0.816909	AIMP2	aminoacyl tRNA synthetase complex interacting multifunctional protein 2
218945_at	0.0455	0.00173	-3.99419	-1.05112	-0.558557	METTL22	methyltransferase like 22
216783_at	0.0455	0.00174	-3.99378	-1.05183	-0.958551
206364_at	0.0455	0.00174	3.99334	-1.05258	1.51017	KIF14	kinesin family member 14
204783_at	0.0455	0.00174	-3.99255	-1.05395	-1.09476	MLF1	myeloid leukemia factor 1
219104_at	0.0455	0.00174	3.9918	-1.05525	0.556619	RNF141	ring finger protein 141
213744_at	0.0455	0.00174	-3.99153	-1.05571	-1.64972	ATRNL1	attractin like 1
206722_s_at	0.0455	0.00175	3.99061	-1.05729	0.668032	LPAR2	lysophosphatidic acid receptor 2
203865_s_at	0.0455	0.00175	-3.9902	-1.05801	-1.74013	ADARB1	adenosine deaminase, RNA specific B1
201997_s_at	0.0455	0.00175	-3.9901	-1.05817	-0.549201	SPEN	spen family transcriptional repressor
208723_at	0.0455	0.00175	-3.99004	-1.05827	-0.736932	USP11	ubiquitin specific peptidase 11
201321_s_at	0.0456	0.00175	-3.98789	-1.06199	-0.699464	SMARCC2	SWI/SNF related, matrix associated, actin dependent regulator of chromatin subfamily c member 2
207436_x_at	0.0458	0.00176	-3.98485	-1.06724	-1.24051	SORBS1	sorbin and SH3 domain containing 1
204580_at	0.0458	0.00177	3.98444	-1.06795	3.59137	MMP12	matrix metallopeptidase 12
205528_s_at	0.0458	0.00177	-3.98365	-1.06931	-2.04165	RUNX1T1	RUNX1 translocation partner 1
208622_s_at	0.0459	0.00177	3.98161	-1.07282	1.78244	EZR	ezrin
202123_s_at	0.0459	0.00178	-3.98079	-1.07424	-0.874976	ABL1	ABL proto-oncogene 1, non-receptor tyrosine kinase
221961_at	0.0459	0.00178	-3.97953	-1.07643	-0.552697	CLCN7	chloride voltage-gated channel 7
213316_at	0.0459	0.00178	-3.97902	-1.07729	-2.38212	KIAA1462	KIAA1462
213340_s_at	0.0459	0.00179	-3.97784	-1.07933	-0.952622	TP73-AS1	TP73 antisense RNA 1
202452_at	0.0459	0.00179	-3.97699	-1.0808	-0.722556	ZER1	zyg-11 related cell cycle regulator
212153_at	0.0459	0.00179	-3.9754	-1.08354	-0.898421	POGZ	pogo transposable element with ZNF domain
219066_at	0.0459	0.0018	3.97441	-1.08525	0.508709	PPCDC	phosphopantothenoylcysteine decarboxylase
201591_s_at	0.0459	0.0018	-3.97343	-1.08695	-0.785106	NISCH	nischarin
220638_s_at	0.0459	0.0018	3.9732	-1.08735	1.03249	CBLC	Cbl proto-oncogene C
208922_s_at	0.0459	0.0018	-3.97308	-1.08756	-0.548526	NXF1	nuclear RNA export factor 1
212796_s_at	0.0459	0.0018	-3.97256	-1.08846	-1.0734	TBC1D2B	TBC1 domain family member 2B
206346_at	0.0459	0.0018	-3.9723	-1.0889	-1.00479	PRLR	prolactin receptor
201772_at	0.0459	0.00181	3.97205	-1.08934	0.963017	AZIN1	antizyme inhibitor 1
208102_s_at	0.0459	0.00181	-3.97157	-1.09016	-1.17541	PSD	pleckstrin and Sec7 domain containing
205282_at	0.0459	0.00181	3.97146	-1.09036	1.36964	LRP8	LDL receptor related protein 8
214179_s_at	0.0459	0.00181	-3.97141	-1.09045	-0.909917	NFE2L1	nuclear factor, erythroid 2 like 1
201119_s_at	0.0459	0.00181	3.97084	-1.09143	0.663991	COX8A	cytochrome c oxidase subunit 8A
220411_x_at	0.046	0.00182	-3.96843	-1.0956	-0.592482	PODNL1	podocan like 1
206632_s_at	0.046	0.00182	3.96834	-1.09574	1.61582	APOBEC3B	apolipoprotein B mRNA editing enzyme catalytic subunit 3B
215471_s_at	0.046	0.00182	3.96787	-1.09656	1.36619	MAP7	microtubule associated protein 7
202545_at	0.0461	0.00183	3.96586	-1.10004	0.876019	PRKCD	protein kinase C delta
203270_at	0.0461	0.00183	3.9651	-1.10135	0.883124	DTYMK	deoxythymidylate kinase
204793_at	0.0461	0.00183	-3.96476	-1.10194	-2.58188	GPRASP1	G protein-coupled receptor associated sorting protein 1
204875_s_at	0.0461	0.00184	3.96242	-1.10597	1.49264	GMDS	GDP-mannose 4,6-dehydratase
204518_s_at	0.0461	0.00184	3.96158	-1.10743	1.38133	PPIC	peptidylprolyl isomerase C
214471_x_at	0.0461	0.00184	-3.96143	-1.10769	-0.499463	CGB1///LHB	chorionic gonadotropin beta subunit 1///luteinizing hormone beta polypeptide
208491_s_at	0.0461	0.00184	-3.96126	-1.10797	-2.04316	PGM5	phosphoglucomutase 5
212978_at	0.0461	0.00184	3.96105	-1.10833	1.49755	LRRC8B	leucine rich repeat containing 8 family member B
221822_at	0.0461	0.00184	-3.96096	-1.10849	-1.15853	SGF29	SAGA complex associated factor 29
200622_x_at	0.0461	0.00185	3.95955	-1.11094	0.906361	CALM3///CALM2///CALM1	calmodulin 3///calmodulin 2///calmodulin 1
205401_at	0.0461	0.00185	3.95912	-1.11167	0.986402	AGPS	alkylglycerone phosphate synthase
203628_at	0.0461	0.00185	-3.95888	-1.11208	-1.70969	IGF1R	insulin like growth factor 1 receptor
206702_at	0.0462	0.00186	-3.95695	-1.11543	-1.497	TEK	TEK receptor tyrosine kinase
208323_s_at	0.0463	0.00186	-3.95566	-1.11765	-0.713093	ANXA13	annexin A13
201410_at	0.0463	0.00186	3.95508	-1.11866	1.01304	PLEKHB2	pleckstrin homology domain containing B2
208816_x_at	0.0464	0.00187	3.95271	-1.12276	1.48427	ANXA2P2	annexin A2 pseudogene 2
209531_at	0.0464	0.00187	3.95254	-1.12305	0.916195	GSTZ1	glutathione S-transferase zeta 1
203734_at	0.0464	0.00187	-3.95208	-1.12385	-0.901828	FOXJ2	forkhead box J2
218979_at	0.0464	0.00188	3.95123	-1.12532	0.988422	RMI1	RecQ mediated genome instability 1
221176_x_at	0.0464	0.00188	-3.94967	-1.12802	-0.700019
205770_at	0.0464	0.00188	3.94957	-1.12819	1.61594	GSR	glutathione-disulfide reductase
206954_at	0.0465	0.00188	-3.94871	-1.12967	-2.07331	WT1-AS	WT1 antisense RNA
201609_x_at	0.0467	0.00189	3.94587	-1.13458	0.754365	ICMT	isoprenylcysteine carboxyl methyltransferase
221637_s_at	0.0467	0.0019	3.94449	-1.13698	0.875478	C11orf98///LBHD1	chromosome 11 open reading frame 98///LBH domain containing 1
218081_at	0.0467	0.0019	-3.94391	-1.13798	-0.931234	C20orf27	chromosome 20 open reading frame 27
215316_at	0.0467	0.0019	-3.94369	-1.13836	-1.0346
202466_at	0.0467	0.0019	-3.94261	-1.14022	-0.592838	PAPD7	poly(A) RNA polymerase D7, non-canonical
213646_x_at	0.0467	0.00191	3.94245	-1.14049	0.466357	TUBA1B	tubulin alpha 1b
AFFX-HUMISGF3A/M97935_3_at	0.0467	0.00191	3.94164	-1.14191	1.23641	STAT1	signal transducer and activator of transcription 1
203947_at	0.0468	0.00192	3.9394	-1.14577	0.459591	CSTF3	cleavage stimulation factor subunit 3
212755_at	0.0469	0.00192	-3.93756	-1.14896	-0.78596	MON2	MON2 homolog, regulator of endosome-to-Golgi trafficking
203666_at	0.0469	0.00192	-3.93733	-1.14937	-2.30972	CXCL12	C-X-C motif chemokine ligand 12
208623_s_at	0.0469	0.00193	3.93601	-1.15165	1.43294	EZR	ezrin
208671_at	0.0469	0.00193	-3.93551	-1.15251	-0.938156	SERINC1	serine incorporator 1
211700_s_at	0.0469	0.00193	-3.93493	-1.15351	-2.00952	TRO	trophinin
200669_s_at	0.0469	0.00193	3.93421	-1.15477	0.73504	UBE2D3	ubiquitin conjugating enzyme E2 D3
203023_at	0.0469	0.00193	3.93398	-1.15516	1.0821	NOP16	NOP16 nucleolar protein
205529_s_at	0.0469	0.00194	-3.93307	-1.15673	-2.39275	RUNX1T1	RUNX1 translocation partner 1
203968_s_at	0.0469	0.00194	3.93304	-1.15678	1.28296	CDC6	cell division cycle 6
208711_s_at	0.0469	0.00194	3.93212	-1.15838	1.97744	CCND1	cyclin D1
205024_s_at	0.0469	0.00195	3.93074	-1.16076	1.40145	RAD51	RAD51 recombinase
209080_x_at	0.0469	0.00195	3.9307	-1.16084	0.862864	GLRX3	glutaredoxin 3
221527_s_at	0.0469	0.00195	-3.93023	-1.16164	-0.880915	PARD3	par-3 family cell polarity regulator
217832_at	0.0469	0.00195	3.93003	-1.162	0.802925	SYNCRIP	synaptotagmin binding cytoplasmic RNA interacting protein
200890_s_at	0.047	0.00196	3.92782	-1.16583	0.814189	SSR1	signal sequence receptor subunit 1
207357_s_at	0.047	0.00196	3.92743	-1.1665	1.16314	GALNT10	polypeptide N-acetylgalactosaminyltransferase 10
207856_s_at	0.047	0.00196	-3.92635	-1.16836	-0.64704	LOC150776///SMPD4	sphingomyelin phosphodiesterase 4, neutral membrane (neutral sphingomyelinase-3) pseudogene///sphingomyelin phosphodiesterase 4
218194_at	0.047	0.00196	-3.92599	-1.16899	-0.487086	REXO2	RNA exonuclease 2
204906_at	0.047	0.00196	-3.92586	-1.16921	-0.904196	RPS6KA2	ribosomal protein S6 kinase A2
214109_at	0.0471	0.00197	3.925	-1.1707	1.36075	LRBA	LPS responsive beige-like anchor protein
207837_at	0.0471	0.00197	-3.92442	-1.17171	-1.46548	RBPMS	RNA binding protein with multiple splicing
213503_x_at	0.0474	0.00199	3.91972	-1.17985	1.61284	ANXA2	annexin A2
33322_i_at	0.0475	0.00199	3.91757	-1.18357	2.70123	SFN	stratifin
209726_at	0.0476	0.002	-3.91611	-1.18609	-1.96944	CA11	carbonic anhydrase 11
210427_x_at	0.0476	0.002	3.9156	-1.18698	1.64098	ANXA2	annexin A2
204510_at	0.0477	0.00201	3.91406	-1.18966	1.49848	CDC7	cell division cycle 7
212725_s_at	0.0477	0.00201	-3.91351	-1.1906	-0.457584	TUG1	taurine up-regulated 1 (non-protein coding)
220355_s_at	0.0477	0.00201	-3.9126	-1.19219	-0.510194	PBRM1	polybromo 1
201086_x_at	0.0479	0.00202	-3.90998	-1.19673	-0.567552	SON	SON DNA binding protein
208736_at	0.0479	0.00202	3.90898	-1.19845	0.880621	ARPC3	actin related protein 2/3 complex subunit 3
216161_at	0.048	0.00203	-3.90826	-1.19971	-0.649769	SBNO1	strawberry notch homolog 1
220150_s_at	0.048	0.00203	-3.90703	-1.20183	-1.0405	FAM184A	family with sequence similarity 184 member A
212315_s_at	0.0481	0.00204	3.90521	-1.20499	1.03742	NUP210	nucleoporin 210
208864_s_at	0.0483	0.00205	3.90298	-1.20885	1.1724	TXN	thioredoxin
212991_at	0.0483	0.00205	-3.90167	-1.21112	-1.47979	FBXO9	F-box protein 9
212852_s_at	0.0483	0.00205	-3.90126	-1.21184	-0.795126	TROVE2	TROVE domain family member 2
218797_s_at	0.0485	0.00207	3.89812	-1.21728	0.522314	SIRT7	sirtuin 7
205518_s_at	0.0485	0.00207	-3.89753	-1.2183	-1.98804	CMAHP	cytidine monophospho-N-acetylneuraminic acid hydroxylase, pseudogene
202889_x_at	0.0486	0.00207	3.89633	-1.22038	1.30171	MAP7	microtubule associated protein 7
209068_at	0.0487	0.00208	-3.89461	-1.22336	-1.29544	HNRNPDL	heterogeneous nuclear ribonucleoprotein D like
214594_x_at	0.0488	0.00208	-3.89306	-1.22606	-0.859871	ATP8B1	ATPase phospholipid transporting 8B1
215947_s_at	0.0489	0.0021	3.89033	-1.23079	1.07717	LOC100287852///FAM136A	protein FAM136A pseudogene///family with sequence similarity 136 member A
201590_x_at	0.0489	0.0021	3.88933	-1.23252	1.64039	ANXA2	annexin A2
215123_at	0.0489	0.00211	-3.88733	-1.23599	-1.0339	NPIPA5///NPIPB5///LOC613037///NPIPB4///NPIPB3	nuclear pore complex interacting protein family member A5///nuclear pore complex interacting protein family member B5///nuclear pore complex interacting protein member///nuclear pore complex interacting protein family member B4///nuclear pore complex interacting protein family member B3
203190_at	0.0489	0.00211	3.88678	-1.23695	0.598994	MIR7113///MIR4691///NDUFS8	microRNA 7113///microRNA 4691///NADH:ubiquinone oxidoreductase core subunit S8
221885_at	0.0489	0.00211	-3.88674	-1.23702	-1.46279	DENND2A	DENN domain containing 2A
207318_s_at	0.0489	0.00211	-3.88671	-1.23707	-0.391474	CDK13	cyclin dependent kinase 13
216628_at	0.0489	0.00211	-3.88625	-1.23786	-0.827037
64486_at	0.0489	0.00211	3.88598	-1.23834	0.673815	CORO1B	coronin 1B
204905_s_at	0.0489	0.00212	3.8849	-1.24022	0.887492	EEF1E1	eukaryotic translation elongation factor 1 epsilon 1
212922_s_at	0.0489	0.00212	3.88474	-1.24049	1.49241	SMYD2	SET and MYND domain containing 2
209141_at	0.0489	0.00212	3.88412	-1.24157	0.551798	UBE2G1	ubiquitin conjugating enzyme E2 G1
217994_x_at	0.0489	0.00212	-3.88309	-1.24335	-0.591733	MIR6727///CPSF3L	microRNA 6727///cleavage and polyadenylation specific factor 3-like
212594_at	0.0489	0.00213	-3.88191	-1.2454	-1.23431	MIR4680///PDCD4	microRNA 4680///programmed cell death 4 (neoplastic transformation inhibitor)
203934_at	0.0489	0.00213	-3.88088	-1.24719	-1.38281	KDR	kinase insert domain receptor
206122_at	0.0489	0.00213	-3.88015	-1.24846	-1.37958	SOX15	SRY-box 15
217779_s_at	0.0489	0.00214	-3.87968	-1.24926	-0.462794	PNRC2	proline rich nuclear receptor coactivator 2
213085_s_at	0.0489	0.00214	3.87886	-1.25069	1.93355	WWC1	WW and C2 domain containing 1
201338_x_at	0.0489	0.00214	3.87871	-1.25094	0.880624	GTF3A	general transcription factor IIIA
213332_at	0.0489	0.00214	-3.87764	-1.25281	-0.880497	PAPPA2	pappalysin 2
208581_x_at	0.0489	0.00215	3.87717	-1.25363	1.66354	MT1X	metallothionein 1X
207956_x_at	0.0489	0.00215	-3.87689	-1.25411	-0.831051	PDS5B	PDS5 cohesin associated factor B
211793_s_at	0.0489	0.00215	3.87668	-1.25448	0.66984	ABI2	abl-interactor 2
204225_at	0.0489	0.00215	-3.87662	-1.25458	-0.748851	HDAC4	histone deacetylase 4
222216_s_at	0.0489	0.00215	3.87633	-1.25508	0.518834	MRPL17	mitochondrial ribosomal protein L17
200738_s_at	0.0489	0.00215	3.87625	-1.25522	1.18947	PGK1	phosphoglycerate kinase 1
201128_s_at	0.0489	0.00215	3.87534	-1.2568	1.03315	ACLY	ATP citrate lyase
212498_at	0.0489	0.00215	-3.87531	-1.25685	-0.905681	2020-03-06	membrane associated ring-CH-type finger 6
218391_at	0.0489	0.00215	3.87507	-1.25726	0.473482	SNF8	SNF8, ESCRT-II complex subunit
201114_x_at	0.0489	0.00216	3.87447	-1.25831	0.439104	PSMA7	proteasome subunit alpha 7
202553_s_at	0.0489	0.00216	-3.87442	-1.2584	-0.727399	SYF2	SYF2 pre-mRNA splicing factor
201133_s_at	0.0489	0.00216	-3.8737	-1.25965	-0.72947	PJA2	praja ring finger ubiquitin ligase 2
206554_x_at	0.0489	0.00216	-3.87326	-1.26042	-1.17127	SETMAR	SET domain and mariner transposase fusion gene
203594_at	0.0489	0.00216	3.87273	-1.26134	0.919833	RTCA	RNA 3'-terminal phosphate cyclase
212268_at	0.0489	0.00217	3.8719	-1.26277	1.79529	SERPINB1	serpin family B member 1
201524_x_at	0.0489	0.00217	3.87062	-1.26499	0.586413	UBE2N	ubiquitin conjugating enzyme E2 N
202436_s_at	0.0489	0.00218	-3.86947	-1.267	-2.33138	CYP1B1	cytochrome P450 family 1 subfamily B member 1
217751_at	0.0489	0.00218	3.8692	-1.26746	0.914775	GSTK1	glutathione S-transferase kappa 1
213465_s_at	0.0489	0.00218	3.86912	-1.2676	0.685244	PPP1R7	protein phosphatase 1 regulatory subunit 7
37201_at	0.0489	0.00218	-3.86899	-1.26782	-0.713106	ITIH4	inter-alpha-trypsin inhibitor heavy chain family member 4
207133_x_at	0.0489	0.00218	-3.86783	-1.26984	-0.783895	ALPK1	alpha kinase 1
201319_at	0.0489	0.00218	3.86776	-1.26996	0.650137	MYL12A	myosin light chain 12A
212494_at	0.0489	0.00218	-3.86763	-1.27019	-1.49565	TNS2	tensin 2
201090_x_at	0.0491	0.00219	3.86571	-1.27353	0.510263	TUBA1B	tubulin alpha 1b
202435_s_at	0.0491	0.00219	-3.86488	-1.27497	-2.14782	CYP1B1	cytochrome P450 family 1 subfamily B member 1
200846_s_at	0.0491	0.0022	3.86418	-1.27617	0.998724	PPP1CA	protein phosphatase 1 catalytic subunit alpha
204004_at	0.0491	0.0022	-3.86253	-1.27904	-1.92413	PAWR	pro-apoptotic WT1 regulator
203146_s_at	0.0491	0.00221	-3.86196	-1.28003	-2.02156	GABBR1	gamma-aminobutyric acid type B receptor subunit 1
218739_at	0.0491	0.00221	3.86191	-1.28012	1.02952	ABHD5	abhydrolase domain containing 5
213629_x_at	0.0491	0.00221	3.86166	-1.28056	2.59515	MT1F	metallothionein 1F
218653_at	0.0492	0.00221	3.86064	-1.28232	1.12329	SLC25A15	solute carrier family 25 member 15
213228_at	0.0492	0.00222	-3.85963	-1.28408	-2.59058	PDE8B	phosphodiesterase 8B
201061_s_at	0.0492	0.00222	-3.85888	-1.28538	-0.921518	STOM	stomatin
204663_at	0.0492	0.00222	-3.85885	-1.28544	-1.15537	ME3	malic enzyme 3
209510_at	0.0493	0.00223	-3.85715	-1.28839	-0.638376	RNF139	ring finger protein 139
200887_s_at	0.0493	0.00223	3.85699	-1.28867	1.21982	STAT1	signal transducer and activator of transcription 1
37462_i_at	0.0493	0.00223	-3.85551	-1.29124	-0.734323	SF3A2	splicing factor 3a subunit 2
208840_s_at	0.0494	0.00224	3.85437	-1.29322	0.896271	G3BP2	G3BP stress granule assembly factor 2
212358_at	0.0494	0.00224	-3.85346	-1.2948	-1.71969	CLIP3	CAP-Gly domain containing linker protein 3
221735_at	0.0496	0.00225	-3.8505	-1.29995	-0.70895	WDR48	WD repeat domain 48
212606_at	0.0497	0.00226	-3.84904	-1.30249	-0.602302	WDFY3	WD repeat and FYVE domain containing 3
204318_s_at	0.0497	0.00226	3.84868	-1.30311	1.23935	GTSE1	G2 and S-phase expressed 1
221436_s_at	0.0497	0.00226	3.84832	-1.30373	1.13032	CDCA3	cell division cycle associated 3
210346_s_at	0.0497	0.00226	-3.84769	-1.30483	-0.885307	CLK4	CDC like kinase 4
214481_at	0.0497	0.00227	3.84703	-1.30598	0.547168	HIST1H2AM	histone cluster 1, H2am
208430_s_at	0.0497	0.00227	-3.84619	-1.30744	-0.552554	DTNA	dystrobrevin alpha
218683_at	0.0497	0.00227	-3.84536	-1.30887	-0.961506	PTBP2	polypyrimidine tract binding protein 2
200700_s_at	0.0497	0.00228	3.84505	-1.30941	1.10591	KDELR2	KDEL endoplasmic reticulum protein retention receptor 2
214016_s_at	0.0497	0.00228	-3.84453	-1.31032	-0.906418	SFPQ	splicing factor proline and glutamine rich
208919_s_at	0.0498	0.00228	3.8432	-1.31263	0.444301	NADK	NAD kinase
219496_at	0.0499	0.00229	-3.84044	-1.31743	-1.35039	SOWAHC	sosondowah ankyrin repeat domain family member C
204146_at	0.0499	0.0023	3.84028	-1.31771	1.56781	RAD51AP1	RAD51 associated protein 1
213396_s_at	0.0499	0.0023	-3.84015	-1.31794	-0.53675	AKAP10	A-kinase anchoring protein 10
218069_at	0.0499	0.0023	3.83977	-1.3186	1.06546	DCTPP1	dCTP pyrophosphatase 1
208831_x_at	0.0499	0.0023	-3.83884	-1.32021	-0.431345	SUPT6H	SPT6 homolog, histone chaperone
200075_s_at	0.0499	0.0023	3.8388	-1.32029	0.433681	GUK1	guanylate kinase 1
209163_at	0.0499	0.0023	3.83875	-1.32038	1.41233	CYB561	cytochrome b561
218049_s_at	0.05	0.00232	3.83553	-1.32596	1.22359	MRPL13	mitochondrial ribosomal protein L13
218282_at	0.05	0.00232	3.83515	-1.32663	0.937411	EDEM2	ER degradation enhancing alpha-mannosidase like protein 2
219079_at	0.05	0.00232	3.83492	-1.32703	0.728561	CYB5R4	cytochrome b5 reductase 4
222133_s_at	0.05	0.00232	-3.83488	-1.3271	-0.72584	PHF20L1	PHD finger protein 20-like 1
215888_at	0.05	0.00232	-3.83483	-1.32718	-1.09446	PDS5B	PDS5 cohesin associated factor B
213012_at	0.0501	0.00232	-3.8335	-1.3295	-1.11849	NEDD4	neural precursor cell expressed, developmentally down-regulated 4, E3 ubiquitin protein ligase
222264_at	0.0502	0.00233	3.83162	-1.33278	0.765034	HNRNPUL2	heterogeneous nuclear ribonucleoprotein U like 2
211701_s_at	0.0502	0.00234	-3.83073	-1.33432	-1.5874	TRO	trophinin
203028_s_at	0.0502	0.00234	3.83049	-1.33474	1.77758	CYBA	cytochrome b-245 alpha chain
204017_at	0.0502	0.00234	3.82976	-1.336	1.8355	KDELR3	KDEL endoplasmic reticulum protein retention receptor 3
203969_at	0.0502	0.00234	-3.8296	-1.33629	-0.7603	PEX3	peroxisomal biogenesis factor 3
211725_s_at	0.0502	0.00235	3.82821	-1.3387	1.54023	BID	BH3 interacting domain death agonist
218062_x_at	0.0502	0.00235	-3.82766	-1.33965	-0.734242	CDC42EP4	CDC42 effector protein 4
41220_at	0.0502	0.00235	3.82703	-1.34076	0.581648	2020-09-09	septin 9
212859_x_at	0.0502	0.00235	3.82661	-1.34149	1.12017	MT1E	metallothionein 1E
201602_s_at	0.0502	0.00235	-3.82632	-1.342	-1.20619	PPP1R12A	protein phosphatase 1 regulatory subunit 12A
214071_at	0.0502	0.00236	-3.82583	-1.34284	-1.15774	GNAL	G protein subunit alpha L
218368_s_at	0.0503	0.00236	3.82512	-1.34408	1.26644	TNFRSF12A	TNF receptor superfamily member 12A
201839_s_at	0.0503	0.00236	3.82402	-1.34599	3.18827	EPCAM	epithelial cell adhesion molecule
209538_at	0.0503	0.00237	-3.82354	-1.34682	-0.815721	ZNF32	zinc finger protein 32
201275_at	0.0504	0.00237	3.82196	-1.34958	0.548315	FDPS	farnesyl diphosphate synthase
212784_at	0.0504	0.00238	-3.82078	-1.35163	-0.729005	CIC	capicua transcriptional repressor
219494_at	0.0504	0.00238	3.82011	-1.3528	1.45953	RAD54B	RAD54 homolog B (S. cerevisiae)
218342_s_at	0.0504	0.00238	3.81962	-1.35365	0.817288	ERMP1	endoplasmic reticulum metallopeptidase 1
202737_s_at	0.0504	0.00238	3.81954	-1.35379	0.989875	LSM4	LSM4 homolog, U6 small nuclear RNA and mRNA degradation associated
218351_at	0.0505	0.00239	3.81794	-1.35657	0.8741	COMMD8	COMM domain containing 8
215232_at	0.0506	0.0024	-3.81674	-1.35867	-0.723696	ARHGAP44	Rho GTPase activating protein 44
220739_s_at	0.0506	0.0024	-3.81669	-1.35875	-0.847767	CNNM3	cyclin and CBS domain divalent metal cation transport mediator 3
219500_at	0.0506	0.0024	-3.81574	-1.36041	-1.02502	CLCF1	cardiotrophin-like cytokine factor 1
205497_at	0.0508	0.00241	-3.81324	-1.36476	-0.726927	ZNF175	zinc finger protein 175
221234_s_at	0.0508	0.00242	-3.81247	-1.36609	-1.97754	BACH2	BTB domain and CNC homolog 2
221534_at	0.0508	0.00242	-3.81217	-1.36662	-0.772568	C11orf68	chromosome 11 open reading frame 68
209337_at	0.0508	0.00242	-3.81033	-1.36982	-1.17147	PSIP1	PC4 and SFRS1 interacting protein 1
222371_at	0.0508	0.00243	-3.80985	-1.37065	-0.765892
202136_at	0.0508	0.00243	-3.80953	-1.37122	-0.666864	ZMYND11	zinc finger MYND-type containing 11
201810_s_at	0.0508	0.00243	-3.80898	-1.37217	-1.61316	SH3BP5	SH3 domain binding protein 5
205661_s_at	0.0508	0.00243	3.80808	-1.37373	0.679076	FLAD1	flavin adenine dinucleotide synthetase 1
219960_s_at	0.0508	0.00244	3.80789	-1.37407	0.794229	UCHL5	ubiquitin C-terminal hydrolase L5
204400_at	0.0508	0.00244	-3.80595	-1.37745	-2.05203	EFS	embryonal Fyn-associated substrate
214045_at	0.0508	0.00244	-3.80588	-1.37757	-1.04587	LIAS	lipoic acid synthetase
208689_s_at	0.0508	0.00244	3.80583	-1.37765	1.08579	RPN2	ribophorin II
200832_s_at	0.0508	0.00245	3.80564	-1.37798	2.10212	SCD	stearoyl-CoA desaturase
218770_s_at	0.0508	0.00245	-3.80557	-1.3781	-0.548663	TMEM39B	transmembrane protein 39B
205393_s_at	0.0508	0.00245	3.80506	-1.37899	0.882975	CHEK1	checkpoint kinase 1
201201_at	0.0508	0.00245	3.80501	-1.37909	1.08685	CSTB	cystatin B
215330_at	0.0509	0.00246	-3.80317	-1.38229	-1.67928
203661_s_at	0.0509	0.00246	-3.80263	-1.38323	-2.50066	TMOD1	tropomodulin 1
212104_s_at	0.0509	0.00246	-3.80234	-1.38373	-0.830847	RBFOX2	RNA binding protein, fox-1 homolog 2
216459_x_at	0.051	0.00247	-3.80101	-1.38604	-0.507508	DDR1-AS1	DDR1 antisense RNA 1 (head to head)
212697_at	0.051	0.00247	-3.8009	-1.38625	-0.499745	FAM134C	family with sequence similarity 134 member C
200811_at	0.051	0.00247	-3.8003	-1.38729	-1.3403	CIRBP	cold inducible RNA binding protein
203959_s_at	0.051	0.00247	-3.79993	-1.38793	-0.575322	ZBTB40	zinc finger and BTB domain containing 40
211072_x_at	0.0512	0.00249	3.79697	-1.39309	0.475445	TUBA1B	tubulin alpha 1b
205070_at	0.0512	0.00249	-3.79675	-1.39347	-0.835782	ING3	inhibitor of growth family member 3
214925_s_at	0.0512	0.00249	-3.7962	-1.39443	-0.831437	SPTAN1	spectrin alpha, non-erythrocytic 1
217294_s_at	0.0512	0.00249	3.79501	-1.39651	2.182	ENO1	enolase 1
212182_at	0.0512	0.0025	-3.79449	-1.39742	-0.548175	NUDT4	nudix hydrolase 4
207223_s_at	0.0512	0.0025	3.79343	-1.39925	0.640459	PTBP3	polypyrimidine tract binding protein 3
210908_s_at	0.0512	0.0025	-3.79326	-1.39955	-0.54241	PFDN5	prefoldin subunit 5
213295_at	0.0512	0.0025	-3.79298	-1.40005	-0.937466	CYLD	CYLD lysine 63 deubiquitinase
216750_at	0.0512	0.0025	-3.79289	-1.40019	-0.446947	APBB2	amyloid beta precursor protein binding family B member 2
210870_s_at	0.0513	0.00251	-3.79102	-1.40346	-0.734489	EPM2A	epilepsy, progressive myoclonus type 2A, Lafora disease (laforin)
218516_s_at	0.0514	0.00251	3.79046	-1.40443	0.851739	IMPAD1	inositol monophosphatase domain containing 1
219127_at	0.0515	0.00252	3.78857	-1.40773	2.67066	PRR15L	proline rich 15 like
218398_at	0.0515	0.00252	3.78839	-1.40803	0.743067	MRPS30	mitochondrial ribosomal protein S30
202259_s_at	0.0515	0.00253	-3.78707	-1.41035	-1.15437	N4BP2L2	NEDD4 binding protein 2 like 2
218580_x_at	0.0515	0.00253	3.78641	-1.41149	0.465472	AURKAIP1	aurora kinase A interacting protein 1
210653_s_at	0.0515	0.00254	3.7859	-1.41237	1.2371	BCKDHB	branched chain keto acid dehydrogenase E1 subunit beta
202550_s_at	0.0516	0.00255	3.78382	-1.41601	0.430513	VAPB	VAMP associated protein B and C
210711_at	0.0516	0.00255	-3.78366	-1.41629	-1.48982	LINC00260	long intergenic non-protein coding RNA 260
213989_x_at	0.0516	0.00255	3.78341	-1.41672	0.670953	SETD4	SET domain containing 4
39313_at	0.0516	0.00255	-3.7834	-1.41674	-1.06189	WNK1	WNK lysine deficient protein kinase 1
221809_at	0.0516	0.00255	-3.78328	-1.41695	-0.650144	RANBP10	RAN binding protein 10
209040_s_at	0.0516	0.00256	3.78169	-1.41972	1.18521	PSMB8	proteasome subunit beta 8
201953_at	0.0516	0.00256	3.78143	-1.42017	1.22669	CIB1	calcium and integrin binding 1
202836_s_at	0.0516	0.00256	3.78084	-1.42119	0.823717	TXNL4A	thioredoxin like 4A
206084_at	0.0516	0.00256	-3.78035	-1.42205	-2.03146	PTPRR	protein tyrosine phosphatase, receptor type R
221938_x_at	0.0516	0.00257	-3.77946	-1.4236	-0.584964	MED16	mediator complex subunit 16
202379_s_at	0.0516	0.00257	-3.77939	-1.42373	-0.766043	NKTR	natural killer cell triggering receptor
208583_x_at	0.0517	0.00257	3.77782	-1.42647	0.526041	HIST1H2AJ	histone cluster 1, H2aj
212469_at	0.0517	0.00257	-3.77764	-1.42678	-0.656612	NIPBL	NIPBL, cohesin loading factor
215279_at	0.0517	0.00258	-3.7769	-1.42807	-1.15867
213250_at	0.0518	0.00258	-3.77597	-1.42968	-0.433774	CCDC85B	coiled-coil domain containing 85B
203793_x_at	0.0518	0.00259	-3.775	-1.43138	-0.578697	PCGF2	polycomb group ring finger 2
211576_s_at	0.0518	0.00259	3.7745	-1.43225	0.992653	SLC19A1	solute carrier family 19 member 1
209172_s_at	0.0518	0.00259	3.77361	-1.43381	1.03302	CENPF	centromere protein F
220906_at	0.0518	0.00259	-3.7734	-1.43417	-1.75818
202309_at	0.0519	0.0026	3.77217	-1.43631	1.00696	MTHFD1	methylenetetrahydrofolate dehydrogenase, cyclohydrolase and formyltetrahydrofolate synthetase 1
1316_at	0.0519	0.0026	-3.77146	-1.43755	-0.370161	THRA	thyroid hormone receptor, alpha
204162_at	0.0519	0.00261	3.77118	-1.43805	1.25452	NDC80	NDC80, kinetochore complex component
215043_s_at	0.0519	0.00261	-3.77105	-1.43828	-1.55756	GUSBP3///SMA5///SMA4	glucuronidase, beta pseudogene 3///glucuronidase beta pseudogene///glucuronidase beta pseudogene
202528_at	0.0519	0.00261	3.77009	-1.43995	1.25105	GALE	UDP-galactose-4-epimerase
213735_s_at	0.052	0.00262	3.76899	-1.44186	0.472253	COX5B	cytochrome c oxidase subunit 5B
212818_s_at	0.052	0.00262	-3.76825	-1.44316	-0.619944	ASB1	ankyrin repeat and SOCS box containing 1
200911_s_at	0.052	0.00262	-3.76824	-1.44317	-1.66738	TACC1	transforming acidic coiled-coil containing protein 1
209945_s_at	0.0521	0.00263	3.76602	-1.44705	0.581619	GSK3B	glycogen synthase kinase 3 beta
220046_s_at	0.0523	0.00264	-3.76423	-1.45017	-0.482072	CCNL1	cyclin L1
202437_s_at	0.0525	0.00265	-3.76157	-1.4548	-2.22031	CYP1B1	cytochrome P450 family 1 subfamily B member 1
208420_x_at	0.0525	0.00266	-3.76063	-1.45645	-0.447961	SUPT6H	SPT6 homolog, histone chaperone
212486_s_at	0.0526	0.00267	-3.75831	-1.46049	-1.08334	FYN	FYN proto-oncogene, Src family tyrosine kinase
217377_x_at	0.0526	0.00267	-3.7583	-1.4605	-0.662749	NTRK3	neurotrophic receptor tyrosine kinase 3
218992_at	0.0526	0.00267	3.75818	-1.46073	0.944556	PLGRKT	plasminogen receptor with a C-terminal lysine
217234_s_at	0.0526	0.00267	3.75806	-1.46094	1.57403	EZR	ezrin
213568_at	0.0526	0.00267	-3.75734	-1.46219	-3.0136	OSR2	odd-skipped related transciption factor 2
221435_x_at	0.0526	0.00268	-3.75649	-1.46367	-0.720038	HYI	hydroxypyruvate isomerase (putative)
211058_x_at	0.0527	0.00268	3.75495	-1.46636	0.503742	TUBA1B	tubulin alpha 1b
221928_at	0.0527	0.00269	-3.75424	-1.4676	-1.53644	ACACB	acetyl-CoA carboxylase beta
204448_s_at	0.0527	0.00269	3.75421	-1.46765	0.588708	PDCL	phosducin like
213509_x_at	0.0527	0.00269	-3.75417	-1.46772	-0.436354	CES2	carboxylesterase 2
222186_at	0.0528	0.0027	-3.75269	-1.4703	-0.656767
202317_s_at	0.0528	0.0027	-3.75218	-1.4712	-0.816297	UBE4B	ubiquitination factor E4B
201587_s_at	0.053	0.00271	3.74925	-1.47631	0.951349	IRAK1	interleukin 1 receptor associated kinase 1
218492_s_at	0.053	0.00271	-3.74886	-1.47698	-0.666989	THAP7	THAP domain containing 7
212487_at	0.053	0.00272	-3.74806	-1.47838	-0.576531	GPATCH8	G-patch domain containing 8
210802_s_at	0.053	0.00272	3.74795	-1.47857	0.760695	DIMT1	DIM1 dimethyladenosine transferase 1 homolog
221666_s_at	0.053	0.00272	3.74729	-1.47973	1.09009	PYCARD	PYD and CARD domain containing
221520_s_at	0.053	0.00273	3.74649	-1.48112	1.14138	CDCA8	cell division cycle associated 8
221255_s_at	0.0531	0.00273	3.7457	-1.48251	0.477013	EMC6	ER membrane protein complex subunit 6
204802_at	0.0531	0.00273	-3.74543	-1.48298	-1.3458	RRAD	RRAD, Ras related glycolysis inhibitor and calcium channel regulator
209550_at	0.0531	0.00274	-3.74434	-1.48488	-2.06387	NDN	necdin, MAGE family member
203024_s_at	0.0531	0.00274	3.7433	-1.48669	0.570534	C5orf15	chromosome 5 open reading frame 15
203685_at	0.0531	0.00274	-3.74327	-1.48675	-2.11282	BCL2	BCL2, apoptosis regulator
201527_at	0.0531	0.00275	3.74252	-1.48805	0.540179	LOC101927180///ATP6V1F	V-type proton ATPase subunit F pseudogene///ATPase H+ transporting V1 subunit F
217851_s_at	0.0531	0.00275	3.74221	-1.48859	1.16143	PRELID3B	PRELI domain containing 3B
213345_at	0.0531	0.00275	-3.74198	-1.48899	-0.708587	NFATC4	nuclear factor of activated T-cells 4
218160_at	0.0531	0.00275	3.7415	-1.48983	0.493864	NDUFA8	NADH:ubiquinone oxidoreductase subunit A8
212653_s_at	0.0531	0.00275	-3.74131	-1.49017	-1.07263	EHBP1	EH domain binding protein 1
211025_x_at	0.0531	0.00276	3.74012	-1.49225	0.504801	COX5B	cytochrome c oxidase subunit 5B
201561_s_at	0.0531	0.00276	-3.74003	-1.4924	-0.737299	CLSTN1	calsyntenin 1
222036_s_at	0.0531	0.00276	3.73978	-1.49284	1.53374	MCM4	minichromosome maintenance complex component 4
218267_at	0.0531	0.00276	3.73921	-1.49384	0.440144	CINP	cyclin dependent kinase 2 interacting protein
204482_at	0.0531	0.00276	-3.73914	-1.49395	-1.31533	CLDN5	claudin 5
212026_s_at	0.0534	0.00279	-3.73474	-1.50164	-0.698173	EXOC7	exocyst complex component 7
202468_s_at	0.0534	0.00279	-3.73472	-1.50167	-0.72484	CTNNAL1	catenin alpha like 1
215139_at	0.0535	0.00279	-3.73304	-1.50461	-1.01035	ARHGEF10	Rho guanine nucleotide exchange factor 10
212330_at	0.0535	0.0028	3.73274	-1.50513	0.692577	TFDP1	transcription factor Dp-1
213946_s_at	0.0536	0.0028	-3.73104	-1.5081	-1.8135	OBSL1	obscurin like 1
222141_at	0.0536	0.00281	-3.72973	-1.51039	-0.989804	KLHL22	kelch like family member 22
210337_s_at	0.0536	0.00281	3.72939	-1.51098	1.12505	ACLY	ATP citrate lyase
219321_at	0.0536	0.00282	3.72847	-1.5126	0.499556	MPP5	membrane palmitoylated protein 5
215201_at	0.0536	0.00282	-3.72776	-1.51384	-1.12068	REPS1	RALBP1 associated Eps domain containing 1
218421_at	0.0536	0.00282	-3.7276	-1.51412	-0.814167	CERK	ceramide kinase
218387_s_at	0.0536	0.00282	3.72745	-1.51438	0.708988	PGLS	6-phosphogluconolactonase
220027_s_at	0.0536	0.00282	-3.72728	-1.51468	-1.31923	RASIP1	Ras interacting protein 1
209507_at	0.0536	0.00282	3.72715	-1.5149	0.894955	RPA3	replication protein A3
213523_at	0.0536	0.00283	3.72641	-1.5162	1.79385	CCNE1	cyclin E1
202343_x_at	0.0536	0.00283	3.72568	-1.51748	0.52788	COX5B	cytochrome c oxidase subunit 5B
204479_at	0.0536	0.00283	3.72553	-1.51774	1.02024	OSTF1	osteoclast stimulating factor 1
212483_at	0.0536	0.00283	-3.72528	-1.51816	-0.873044	NIPBL	NIPBL, cohesin loading factor
219167_at	0.0536	0.00284	-3.72519	-1.51833	-2.28175	RASL12	RAS like family 12
203087_s_at	0.0536	0.00284	3.72471	-1.51917	1.32195	KIF2A	kinesin family member 2A
204517_at	0.0536	0.00284	3.72448	-1.51957	1.59678	PPIC	peptidylprolyl isomerase C
202191_s_at	0.0536	0.00284	-3.72416	-1.52012	-1.18812	GAS7	growth arrest specific 7
217847_s_at	0.0536	0.00284	3.72335	-1.52155	0.55623	THRAP3	thyroid hormone receptor associated protein 3
222339_x_at	0.0536	0.00285	-3.7229	-1.52232	-0.47212
204768_s_at	0.0541	0.00287	3.71767	-1.53146	1.24748	FEN1	flap structure-specific endonuclease 1
203022_at	0.0543	0.00289	3.7153	-1.53562	1.22073	RNASEH2A	ribonuclease H2 subunit A
222207_x_at	0.0543	0.00289	-3.7147	-1.53666	-0.62557
214722_at	0.0544	0.0029	-3.71268	-1.54018	-1.09093	NOTCH2NL	notch 2 N-terminal like
201672_s_at	0.0546	0.00291	3.7111	-1.54295	0.479321	USP14	ubiquitin specific peptidase 14
202551_s_at	0.0546	0.00291	-3.71065	-1.54374	-0.680477	LOC101929500///CRIM1	uncharacterized LOC101929500///cysteine rich transmembrane BMP regulator 1
201230_s_at	0.0546	0.00292	-3.70931	-1.54608	-0.565625	ARIH2	ariadne RBR E3 ubiquitin protein ligase 2
205436_s_at	0.0547	0.00293	3.70733	-1.54955	0.923896	H2AFX	H2A histone family member X
221208_s_at	0.0547	0.00294	-3.70606	-1.55175	-0.973168	MSANTD2	Myb/SANT DNA binding domain containing 2
221045_s_at	0.0547	0.00294	-3.70602	-1.55184	-1.48311	PER3	period circadian clock 3
211765_x_at	0.0547	0.00294	3.70533	-1.55303	0.419405	PPIA	peptidylprolyl isomerase A
215371_at	0.0547	0.00294	-3.70532	-1.55305	-0.552794	MED27	mediator complex subunit 27
206240_s_at	0.0547	0.00294	-3.7053	-1.55309	-1.06812	ZNF136	zinc finger protein 136
213034_at	0.0547	0.00294	-3.70499	-1.55364	-0.798752	SIK3	SIK family kinase 3
202449_s_at	0.0547	0.00294	-3.70476	-1.55403	-0.902955	RXRA	retinoid X receptor alpha
215813_s_at	0.0547	0.00294	3.70456	-1.55438	1.17774	PTGS1	prostaglandin-endoperoxide synthase 1
216521_s_at	0.0547	0.00295	3.7039	-1.55553	0.785357	BRCC3	BRCA1/BRCA2-containing complex subunit 3
209447_at	0.0547	0.00295	-3.70369	-1.55591	-1.89985	SYNE1	spectrin repeat containing nuclear envelope protein 1
201270_x_at	0.0548	0.00296	-3.70267	-1.5577	-0.529107	NUDCD3	NudC domain containing 3
202005_at	0.0548	0.00296	3.70226	-1.5584	1.715	ST14	suppression of tumorigenicity 14
205392_s_at	0.0549	0.00297	-3.69986	-1.5626	-2.67056	CCL15-CCL14///CCL14	CCL15-CCL14 readthrough (NMD candidate)///C-C motif chemokine ligand 14
218209_s_at	0.0549	0.00297	3.69979	-1.56273	1.05893	RPRD1A	regulation of nuclear pre-mRNA domain containing 1A
218626_at	0.055	0.00298	-3.69822	-1.56546	-0.489229	EIF4ENIF1	eukaryotic translation initiation factor 4E nuclear import factor 1
41858_at	0.055	0.00298	3.69787	-1.56608	0.644363	PGAP2	post-GPI attachment to proteins 2
200863_s_at	0.0551	0.00299	3.69657	-1.56836	0.830971	RAB11A	RAB11A, member RAS oncogene family
202934_at	0.0552	0.003	3.69511	-1.57091	2.08066	HK2	hexokinase 2
217457_s_at	0.0552	0.003	3.69371	-1.57335	0.786705	RAP1GDS1	Rap1 GTPase-GDP dissociation stimulator 1
204478_s_at	0.0552	0.003	3.69362	-1.57353	0.860095	RABIF	RAB interacting factor
207758_at	0.0552	0.003	-3.69358	-1.57358	-0.442491
209012_at	0.0552	0.00301	-3.69333	-1.57403	-0.8063	TRIO	trio Rho guanine nucleotide exchange factor
201535_at	0.0552	0.00301	-3.69332	-1.57404	-1.18152	UBL3	ubiquitin like 3
220352_x_at	0.0553	0.00301	-3.69203	-1.57629	-0.862067	FLJ42627	uncharacterized LOC645644
216310_at	0.0553	0.00302	-3.69047	-1.57903	-0.691794	TAOK1	TAO kinase 1
218188_s_at	0.0553	0.00302	3.69042	-1.57912	0.765471	TIMM13	translocase of inner mitochondrial membrane 13
219510_at	0.0553	0.00303	3.68971	-1.58036	1.10556	POLQ	DNA polymerase theta
212020_s_at	0.0553	0.00303	3.68902	-1.58157	1.2455	MKI67	marker of proliferation Ki-67
202116_at	0.0553	0.00303	-3.68877	-1.58201	-0.559258	DPF2	double PHD fingers 2
209803_s_at	0.0553	0.00303	3.68868	-1.58215	2.65616	PHLDA2	pleckstrin homology like domain family A member 2
205133_s_at	0.0553	0.00303	3.68835	-1.58274	0.737352	HSPE1	heat shock protein family E (Hsp10) member 1
204653_at	0.0553	0.00304	3.68805	-1.58326	3.00681	TFAP2A	transcription factor AP-2 alpha
216885_s_at	0.0553	0.00304	-3.68691	-1.58526	-0.556389	DCAF8	DDB1 and CUL4 associated factor 8
222155_s_at	0.0553	0.00304	3.68662	-1.58576	0.921795	SLC52A2	solute carrier family 52 member 2
206102_at	0.0553	0.00305	3.68592	-1.58699	1.72342	GINS1	GINS complex subunit 1
204716_at	0.0553	0.00305	3.68577	-1.58725	0.672091	CCDC6	coiled-coil domain containing 6
215387_x_at	0.0553	0.00305	-3.68576	-1.58728	-0.527764
213415_at	0.0555	0.00306	-3.68346	-1.59129	-1.21349	CLIC2	chloride intracellular channel 2
201898_s_at	0.0555	0.00306	3.68337	-1.59145	0.751714	UBE2A	ubiquitin conjugating enzyme E2 A
212447_at	0.0555	0.00307	-3.68211	-1.59366	-0.597429	KBTBD2	kelch repeat and BTB domain containing 2
219099_at	0.0555	0.00308	3.68095	-1.59569	1.44955	TIGAR	TP53 induced glycolysis regulatory phosphatase
216831_s_at	0.0555	0.00308	-3.68046	-1.59654	-1.13471	RUNX1T1	RUNX1 translocation partner 1
218088_s_at	0.0555	0.00308	-3.6804	-1.59665	-0.452614	RRAGC	Ras related GTP binding C
215592_at	0.0555	0.00308	-3.68011	-1.59716	-1.2576
219818_s_at	0.0555	0.00308	-3.67998	-1.59739	-0.62651	GPATCH1	G-patch domain containing 1
214051_at	0.0559	0.0031	-3.67582	-1.60467	-1.52873	TMSB15B///TMSB15A	thymosin beta 15B///thymosin beta 15a
213599_at	0.0559	0.00311	3.67503	-1.60604	1.79963	OIP5	Opa interacting protein 5
200929_at	0.0561	0.00312	3.67266	-1.61019	0.887098	TMED10	transmembrane p24 trafficking protein 10
207492_at	0.0562	0.00313	-3.67156	-1.61213	-0.441623	NGLY1	N-glycanase 1
205803_s_at	0.0562	0.00314	-3.67029	-1.61435	-2.34295	TRPC1	transient receptor potential cation channel subfamily C member 1
211378_x_at	0.0562	0.00314	3.67006	-1.61475	0.458112	LOC101060363///PPIA	peptidyl-prolyl cis-trans isomerase A pseudogene///peptidylprolyl isomerase A
200728_at	0.0562	0.00314	3.66997	-1.61491	0.495441	ACTR2	ARP2 actin related protein 2 homolog
39582_at	0.0562	0.00314	-3.66977	-1.61526	-0.747036	CYLD	CYLD lysine 63 deubiquitinase
216199_s_at	0.0562	0.00314	-3.66962	-1.61552	-0.778994	MAP3K4	mitogen-activated protein kinase kinase kinase 4
202740_at	0.0562	0.00315	3.66881	-1.61694	0.996485	ABHD14A-ACY1///ACY1	ABHD14A-ACY1 readthrough///aminoacylase 1
217795_s_at	0.0562	0.00315	-3.66827	-1.61789	-0.747401	TMEM43	transmembrane protein 43
209729_at	0.0562	0.00315	3.66804	-1.61829	0.482252	GAS2L1	growth arrest specific 2 like 1
208074_s_at	0.0563	0.00316	3.66681	-1.62044	0.719264	AP2S1	adaptor related protein complex 2 sigma 1 subunit
209687_at	0.0563	0.00316	-3.66582	-1.62218	-3.19879	CXCL12	C-X-C motif chemokine ligand 12
200702_s_at	0.0563	0.00316	-3.66563	-1.62251	-0.601992	DDX24	DEAD-box helicase 24
33323_r_at	0.0564	0.00317	3.66483	-1.62391	3.02524	SFN	stratifin
202451_at	0.0565	0.00318	-3.66365	-1.62597	-0.476791	GTF2H1	general transcription factor IIH subunit 1
210249_s_at	0.0566	0.00318	-3.66206	-1.62875	-0.720643	NCOA1	nuclear receptor coactivator 1
216614_at	0.0568	0.0032	-3.65952	-1.63321	-1.12638
217932_at	0.0568	0.0032	3.65897	-1.63417	0.686019	MRPS7	mitochondrial ribosomal protein S7
213501_at	0.0568	0.00321	3.65784	-1.63614	0.862715	ACOX1	acyl-CoA oxidase 1
202724_s_at	0.0568	0.00321	-3.65752	-1.6367	-1.19816	FOXO1	forkhead box O1
203358_s_at	0.0568	0.00321	3.65752	-1.6367	1.43183	EZH2	enhancer of zeste 2 polycomb repressive complex 2 subunit
218317_x_at	0.0568	0.00322	3.65673	-1.6381	0.783221	SLX1A///SLX1B	SLX1 homolog A, structure-specific endonuclease subunit///SLX1 homolog B, structure-specific endonuclease subunit
219617_at	0.0568	0.00322	3.6566	-1.63832	0.794756	CAMKMT	calmodulin-lysine N-methyltransferase
208959_s_at	0.0568	0.00322	3.65605	-1.63928	0.742227	ERP44	endoplasmic reticulum protein 44
212902_at	0.0568	0.00322	3.65582	-1.63969	0.789852	SEC24A	SEC24 homolog A, COPII coat complex component
214915_at	0.0569	0.00323	-3.65497	-1.64117	-0.610946	ZNF362	zinc finger protein 362
209184_s_at	0.057	0.00324	-3.65256	-1.6454	-2.01639	IRS2	insulin receptor substrate 2
201583_s_at	0.057	0.00324	3.65255	-1.64542	1.19836	SEC23B	Sec23 homolog B, coat complex II component
201018_at	0.057	0.00324	-3.65253	-1.64546	-0.655671	EIF1AX	eukaryotic translation initiation factor 1A, X-linked
215418_at	0.057	0.00324	-3.65212	-1.64617	-1.46782	PARVA	parvin alpha
210556_at	0.057	0.00325	-3.6516	-1.64708	-0.76666	NFATC3	nuclear factor of activated T-cells 3
219181_at	0.057	0.00325	3.65082	-1.64844	2.3932	LIPG	lipase G, endothelial type
210058_at	0.0573	0.00327	3.64797	-1.65344	1.58327	MAPK13	mitogen-activated protein kinase 13
218798_at	0.0573	0.00327	-3.64723	-1.65474	-0.396177	KRI1	KRI1 homolog
220618_s_at	0.0573	0.00327	-3.64701	-1.65512	-0.674243	ZCWPW1	zinc finger CW-type and PWWP domain containing 1
205141_at	0.0573	0.00328	-3.64633	-1.65631	-1.55541	ANG	angiogenin
218302_at	0.0573	0.00328	3.64558	-1.65763	1.04749	PSENEN	presenilin enhancer gamma-secretase subunit
218127_at	0.0573	0.00329	-3.64522	-1.65826	-0.623529	NFYB	nuclear transcription factor Y subunit beta
216130_at	0.0573	0.00329	-3.64506	-1.65854	-1.22118
208624_s_at	0.0573	0.00329	3.64452	-1.65947	0.75331	EIF4G1	eukaryotic translation initiation factor 4 gamma 1
203380_x_at	0.0576	0.0033	-3.64194	-1.66401	-0.801153	SRSF5	serine and arginine rich splicing factor 5
203162_s_at	0.0576	0.00331	3.64146	-1.66485	0.711939	KATNB1	katanin regulatory subunit B1
208117_s_at	0.0576	0.00332	-3.64023	-1.667	-0.496818	LAS1L	LAS1 like, ribosome biogenesis factor
217807_s_at	0.0576	0.00332	-3.64003	-1.66735	-0.696531	SNORD23///GLTSCR2	small nucleolar RNA, C/D box 23///glioma tumor suppressor candidate region gene 2
204240_s_at	0.0576	0.00332	3.63972	-1.6679	1.10813	SMC2	structural maintenance of chromosomes 2
212199_at	0.0576	0.00332	-3.63887	-1.66939	-0.569476	MRFAP1L1	Morf4 family associated protein 1 like 1
213183_s_at	0.0576	0.00333	-3.63838	-1.67023	-1.24221
210945_at	0.0576	0.00333	-3.63836	-1.67028	-0.472988	COL4A6	collagen type IV alpha 6 chain
214501_s_at	0.0578	0.00334	3.6366	-1.67336	0.704177	H2AFY	H2A histone family member Y
205644_s_at	0.0578	0.00334	3.63557	-1.67517	0.517105	SNRPG	small nuclear ribonucleoprotein polypeptide G
221954_at	0.0578	0.00335	-3.63489	-1.67635	-0.780969	OSER1	oxidative stress responsive serine rich 1
206059_at	0.0578	0.00335	-3.63414	-1.67767	-1.44773	ZNF91	zinc finger protein 91
201777_s_at	0.0578	0.00336	3.63342	-1.67894	0.895948	EFCAB14	EF-hand calcium binding domain 14
217952_x_at	0.0578	0.00336	-3.63281	-1.68001	-0.945646	PHF3	PHD finger protein 3
209624_s_at	0.0578	0.00337	3.632	-1.68143	1.17291	MCCC2	methylcrotonoyl-CoA carboxylase 2
212563_at	0.0578	0.00337	3.63199	-1.68145	1.07152	MIR7112///BOP1	microRNA 7112///block of proliferation 1
221019_s_at	0.0578	0.00337	-3.63167	-1.682	-2.12166	COLEC12	collectin subfamily member 12
201923_at	0.0578	0.00337	3.63159	-1.68214	0.977056	PRDX4	peroxiredoxin 4
200870_at	0.0578	0.00337	3.63146	-1.68236	0.497258	STRAP	serine/threonine kinase receptor associated protein
209393_s_at	0.0578	0.00337	3.63135	-1.68257	0.689148	EIF4E2	eukaryotic translation initiation factor 4E family member 2
217756_x_at	0.0578	0.00337	3.63067	-1.68376	0.515901	MIR1282///HYPK///SERF2	microRNA 1282///huntingtin interacting protein K///small EDRK-rich factor 2
221389_at	0.0578	0.00338	-3.63046	-1.68412	-0.607179	PLA2G2E	phospholipase A2 group IIE
204131_s_at	0.0578	0.00338	-3.62991	-1.68509	-0.851885	FOXO3	forkhead box O3
221959_at	0.0578	0.00338	-3.6293	-1.68616	-1.01835	FAM110B	family with sequence similarity 110 member B
212253_x_at	0.0578	0.00338	-3.62924	-1.68626	-1.45597	DST	dystonin
202224_at	0.0578	0.00339	-3.62848	-1.68759	-0.936048	CRK	CRK proto-oncogene, adaptor protein
203062_s_at	0.0578	0.00339	-3.62833	-1.68785	-0.747197	MDC1	mediator of DNA damage checkpoint 1
218639_s_at	0.0578	0.00339	-3.62819	-1.68811	-0.544766	ZXDC	ZXD family zinc finger C
32042_at	0.0579	0.0034	-3.62732	-1.68962	-0.783164	ENOX2	ecto-NOX disulfide-thiol exchanger 2
203521_s_at	0.0581	0.00341	-3.62498	-1.69373	-0.413771	ZNF318	zinc finger protein 318
218695_at	0.0581	0.00341	3.62453	-1.69452	0.73184	EXOSC4	exosome component 4
209224_s_at	0.0581	0.00342	3.62392	-1.69558	0.48851	NDUFA2	NADH:ubiquinone oxidoreductase subunit A2
212340_at	0.0581	0.00342	3.62346	-1.6964	0.65351	YIPF6	Yip1 domain family member 6
203663_s_at	0.0581	0.00342	3.62313	-1.69698	0.979274	COX5A	cytochrome c oxidase subunit 5A
202296_s_at	0.0583	0.00344	3.62097	-1.70076	0.606274	RER1	retention in endoplasmic reticulum sorting receptor 1
201013_s_at	0.0584	0.00344	3.61974	-1.70291	0.967093	PAICS	phosphoribosylaminoimidazole carboxylase; phosphoribosylaminoimidazolesuccinocarboxamide synthase
201710_at	0.0585	0.00346	3.6174	-1.70702	1.02448	MYBL2	MYB proto-oncogene like 2
218892_at	0.0585	0.00346	-3.61702	-1.70768	-1.39888	DCHS1	dachsous cadherin-related 1
218306_s_at	0.0585	0.00346	-3.6168	-1.70807	-0.965398	HERC1	HECT and RLD domain containing E3 ubiquitin protein ligase family member 1
206481_s_at	0.0585	0.00346	-3.61653	-1.70855	-2.1478	LDB2	LIM domain binding 2
219569_s_at	0.0585	0.00347	-3.61603	-1.70943	-0.929476	SLC35G2	solute carrier family 35 member G2
201252_at	0.0585	0.00347	3.61557	-1.71023	0.609398	PSMC4	proteasome 26S subunit, ATPase 4
207016_s_at	0.0585	0.00347	-3.61549	-1.71037	-2.99769	LOC101928635///ALDH1A2	uncharacterized LOC101928635///aldehyde dehydrogenase 1 family member A2
205253_at	0.0586	0.00348	-3.61472	-1.71172	-1.2703	PBX1	PBX homeobox 1
215044_s_at	0.0588	0.00349	3.61233	-1.71592	0.648534	STAM2	signal transducing adaptor molecule 2
213400_s_at	0.0589	0.0035	-3.61088	-1.71846	-2.31362	TBL1X	transducin (beta)-like 1X-linked
204772_s_at	0.0589	0.0035	-3.61058	-1.71899	-0.582854	TTF1	transcription termination factor 1
202854_at	0.0589	0.0035	3.6102	-1.71966	0.999804	HPRT1	hypoxanthine phosphoribosyltransferase 1
218825_at	0.0589	0.00351	-3.60972	-1.7205	-1.14005	EGFL7	EGF like domain multiple 7
212345_s_at	0.0589	0.00351	-3.60875	-1.72219	-1.02811	CREB3L2	cAMP responsive element binding protein 3 like 2
201214_s_at	0.0589	0.00351	3.60859	-1.72248	0.494588	PPP1R7	protein phosphatase 1 regulatory subunit 7
202120_x_at	0.0589	0.00352	3.60843	-1.72276	0.664418	AP2S1	adaptor related protein complex 2 sigma 1 subunit
220708_at	0.0589	0.00352	-3.60751	-1.72437	-0.619932
202138_x_at	0.059	0.00353	3.60627	-1.72655	0.743231	AIMP2	aminoacyl tRNA synthetase complex interacting multifunctional protein 2
219648_at	0.0592	0.00354	3.60435	-1.7299	1.7876	MREG	melanoregulin
221264_s_at	0.0593	0.00355	-3.60295	-1.73236	-0.716337	TARDBP	TAR DNA binding protein
218849_s_at	0.0593	0.00355	3.60256	-1.73306	1.07392	PPP1R13L	protein phosphatase 1 regulatory subunit 13 like
202532_s_at	0.0593	0.00355	3.6025	-1.73315	0.961929	DHFR	dihydrofolate reductase
218408_at	0.0593	0.00356	3.60206	-1.73393	0.52329	TIMM10	translocase of inner mitochondrial membrane 10 homolog (yeast)
217933_s_at	0.0596	0.00358	3.5988	-1.73964	1.04986	LAP3	leucine aminopeptidase 3
209349_at	0.0596	0.00358	3.59863	-1.73995	0.707675	RAD50	RAD50 double strand break repair protein
215063_x_at	0.0596	0.00358	-3.59833	-1.74048	-0.535551	LRRC40	leucine rich repeat containing 40
212503_s_at	0.0597	0.00359	-3.59692	-1.74295	-1.07372	DIP2C	disco interacting protein 2 homolog C
203300_x_at	0.0597	0.0036	-3.59621	-1.74419	-1.56538	AP1S2	adaptor related protein complex 1 sigma 2 subunit
206136_at	0.0598	0.0036	3.59511	-1.74613	0.793033	FZD5	frizzled class receptor 5
202178_at	0.0599	0.00361	3.59388	-1.74829	1.35147	PRKCZ	protein kinase C zeta
213278_at	0.0599	0.00361	-3.5935	-1.74894	-0.838411	MTMR9	myotubularin related protein 9
201532_at	0.0599	0.00362	3.59229	-1.75107	0.660839	PSMA3	proteasome subunit alpha 3
213530_at	0.0599	0.00362	-3.59196	-1.75166	-0.72262	RAB3GAP1	RAB3 GTPase activating protein catalytic subunit 1
213243_at	0.0599	0.00363	-3.5918	-1.75192	-0.993948	VPS13B	vacuolar protein sorting 13 homolog B
215156_at	0.06	0.00363	-3.59048	-1.75424	-0.670517	WDR61	WD repeat domain 61
212271_at	0.06	0.00364	3.59031	-1.75455	0.575289	MAPK1	mitogen-activated protein kinase 1
212170_at	0.0603	0.00365	-3.5875	-1.75948	-0.639785	RBM12	RNA binding motif protein 12
218332_at	0.0604	0.00367	-3.58523	-1.76347	-2.10607	BEX1	brain expressed X-linked 1
201293_x_at	0.0604	0.00367	3.5849	-1.76404	0.451168	LOC101060363///PPIA	peptidyl-prolyl cis-trans isomerase A pseudogene///peptidylprolyl isomerase A
218885_s_at	0.0604	0.00368	3.5837	-1.76614	1.81642	GALNT12	polypeptide N-acetylgalactosaminyltransferase 12
215604_x_at	0.0604	0.00368	-3.58307	-1.76725	-0.69174
209497_s_at	0.0604	0.00369	-3.58285	-1.76764	-0.808032	RBM4B	RNA binding motif protein 4B
216977_x_at	0.0604	0.00369	3.58252	-1.76822	0.520641	SNRPA1	small nuclear ribonucleoprotein polypeptide A'
209826_at	0.0604	0.00369	-3.58211	-1.76894	-0.927288	PPT2-EGFL8///EGFL8///PPT2	PPT2-EGFL8 readthrough (NMD candidate)///EGF like domain multiple 8///palmitoyl-protein thioesterase 2
220751_s_at	0.0604	0.00369	-3.5821	-1.76895	-1.98388	FAXDC2	fatty acid hydroxylase domain containing 2
204740_at	0.0604	0.00369	3.58202	-1.7691	0.66785	CNKSR1	connector enhancer of kinase suppressor of Ras 1
212072_s_at	0.0604	0.00369	3.58188	-1.76934	0.477967	CSNK2A1	casein kinase 2 alpha 1
219649_at	0.0604	0.00369	3.58173	-1.76961	0.689362	ALG6	ALG6, alpha-1,3-glucosyltransferase
218325_s_at	0.0604	0.00369	-3.58164	-1.76977	-0.93511	DIDO1	death inducer-obliterator 1
203556_at	0.0604	0.0037	-3.58144	-1.77012	-0.846416	ZHX2	zinc fingers and homeoboxes 2
217735_s_at	0.0604	0.0037	3.58068	-1.77146	0.51245	EIF2AK1	eukaryotic translation initiation factor 2 alpha kinase 1
202920_at	0.0605	0.00371	-3.57941	-1.77368	-2.34536	ANK2	ankyrin 2, neuronal
221918_at	0.0607	0.00373	-3.57687	-1.77814	-1.01989	CDK17	cyclin dependent kinase 17
209197_at	0.0608	0.00373	-3.57601	-1.77965	-1.12401	SYT11	synaptotagmin 11
221882_s_at	0.0609	0.00375	3.57424	-1.78277	1.078	TMEM8A	transmembrane protein 8A
204305_at	0.061	0.00375	3.57356	-1.78395	1.18727	MIPEP	mitochondrial intermediate peptidase
222120_at	0.061	0.00376	-3.57279	-1.7853	-0.435158	ZNF764	zinc finger protein 764
207813_s_at	0.0611	0.00376	3.5721	-1.78652	1.04515	FDXR	ferredoxin reductase
212543_at	0.0611	0.00377	3.57126	-1.78798	1.62878	AIM1	absent in melanoma 1
208880_s_at	0.0611	0.00377	-3.57095	-1.78854	-0.365542	PRPF6	pre-mRNA processing factor 6
201740_at	0.0611	0.00377	3.57003	-1.79015	0.508653	NDUFS3	NADH:ubiquinone oxidoreductase core subunit S3
219577_s_at	0.0611	0.00378	3.56921	-1.79158	0.541637	ABCA7	ATP binding cassette subfamily A member 7
201798_s_at	0.0611	0.00378	3.56895	-1.79205	0.951414	MYOF	myoferlin
203647_s_at	0.0611	0.00378	3.56893	-1.79209	0.858938	FDX1	ferredoxin 1
209251_x_at	0.0612	0.00379	3.56812	-1.79351	0.475577	TUBA1C	tubulin alpha 1c
221891_x_at	0.0612	0.00379	3.56807	-1.79359	0.569629	SNORD14D///SNORD14C///HSPA8	small nucleolar RNA, C/D box 14D///small nucleolar RNA, C/D box 14C///heat shock protein family A (Hsp70) member 8
207034_s_at	0.0612	0.0038	-3.56688	-1.79568	-0.746494	GLI2	GLI family zinc finger 2
218465_at	0.0612	0.0038	3.56669	-1.79601	0.648976	TMEM33	transmembrane protein 33
203046_s_at	0.0612	0.0038	3.56639	-1.79654	1.12184	TIMELESS	timeless circadian clock
220956_s_at	0.0612	0.0038	-3.56588	-1.79745	-0.50183	RAB4B-EGLN2///EGLN2	RAB4B-EGLN2 readthrough (NMD candidate)///egl-9 family hypoxia inducible factor 2
214166_at	0.0612	0.0038	-3.56582	-1.79754	-0.453638	SDHB	succinate dehydrogenase complex iron sulfur subunit B
222037_at	0.0612	0.00381	3.56457	-1.79974	1.31542	MCM4	minichromosome maintenance complex component 4
203853_s_at	0.0612	0.00382	-3.56416	-1.80045	-0.984656	GAB2	GRB2 associated binding protein 2
215311_at	0.0612	0.00382	-3.56362	-1.80141	-1.17229	NTRK3	neurotrophic receptor tyrosine kinase 3
49452_at	0.0612	0.00382	-3.56348	-1.80165	-2.11294	ACACB	acetyl-CoA carboxylase beta
218028_at	0.0612	0.00382	3.56334	-1.8019	0.649756	MIR6734///ELOVL1	microRNA 6734///ELOVL fatty acid elongase 1
210609_s_at	0.0613	0.00383	3.56284	-1.80278	1.52565	TP53I3	tumor protein p53 inducible protein 3
205802_at	0.0613	0.00383	-3.56224	-1.80384	-1.95875	TRPC1	transient receptor potential cation channel subfamily C member 1
201014_s_at	0.0613	0.00383	3.56184	-1.80453	1.12904	PAICS	phosphoribosylaminoimidazole carboxylase; phosphoribosylaminoimidazolesuccinocarboxamide synthase
216336_x_at	0.0614	0.00384	3.56052	-1.80685	0.900573	MT1E	metallothionein 1E
209469_at	0.0614	0.00385	-3.55998	-1.80779	-1.61079	GPM6A	glycoprotein M6A
205945_at	0.0614	0.00385	-3.55929	-1.80902	-0.91722	IL6R	interleukin 6 receptor
208381_s_at	0.0614	0.00385	3.55868	-1.81009	0.596789	SGPL1	sphingosine-1-phosphate lyase 1
212237_at	0.0614	0.00386	-3.55835	-1.81067	-0.549267	ASXL1	additional sex combs like 1, transcriptional regulator
206036_s_at	0.0614	0.00386	-3.55821	-1.81092	-0.867406	REL	REL proto-oncogene, NF-kB subunit
218730_s_at	0.0615	0.00386	-3.55758	-1.81202	-3.21162	OGN	osteoglycin
206101_at	0.0615	0.00387	-3.55655	-1.81382	-1.99971	ECM2	extracellular matrix protein 2
218966_at	0.0615	0.00388	3.55552	-1.81564	1.33065	MYO5C	myosin VC
216768_x_at	0.0615	0.00388	-3.55525	-1.81612	-0.564231	TTC38	tetratricopeptide repeat domain 38
212289_at	0.0615	0.00388	-3.55524	-1.81613	-0.773761	ANKRD12	ankyrin repeat domain 12
204868_at	0.0615	0.00388	3.55507	-1.81643	0.541301	MRPL58	mitochondrial ribosomal protein L58
210855_at	0.0615	0.00388	-3.55471	-1.81705	-0.859365	GREB1	growth regulation by estrogen in breast cancer 1
221650_s_at	0.0615	0.00389	3.55424	-1.81788	0.368363	LOC100996782///MED18	mediator of RNA polymerase II transcription subunit 18-like///mediator complex subunit 18
204369_at	0.0615	0.00389	-3.55367	-1.81889	-0.702165	PIK3CA	phosphatidylinositol-4,5-bisphosphate 3-kinase catalytic subunit alpha
201867_s_at	0.0615	0.0039	-3.55305	-1.81998	-2.12871	TBL1X	transducin (beta)-like 1X-linked
209042_s_at	0.0615	0.0039	-3.55222	-1.82143	-0.842196	UBE2G2	ubiquitin conjugating enzyme E2 G2
205794_s_at	0.0615	0.0039	-3.55203	-1.82176	-1.48541	NOVA1	NOVA alternative splicing regulator 1
208396_s_at	0.0615	0.0039	-3.55195	-1.82191	-1.19831	PDE1A	phosphodiesterase 1A
213008_at	0.0615	0.00391	3.55156	-1.82259	1.17466	FANCI	Fanconi anemia complementation group I
207809_s_at	0.0615	0.00391	3.551	-1.82357	0.512416	ATP6AP1	ATPase H+ transporting accessory protein 1
216484_x_at	0.0615	0.00391	3.5508	-1.82394	0.65701
201735_s_at	0.0615	0.00391	3.55069	-1.82413	0.751833	CLCN3	chloride voltage-gated channel 3
221563_at	0.0617	0.00392	3.54931	-1.82655	1.66284	DUSP10	dual specificity phosphatase 10
221988_at	0.0617	0.00393	-3.54855	-1.82788	-1.10174	SMIM7	small integral membrane protein 7
212583_at	0.0617	0.00393	-3.54788	-1.82906	-0.618573	AQR	aquarius intron-binding spliceosomal factor
220609_at	0.0618	0.00394	-3.54686	-1.83084	-2.1357	LOC202181	SUMO interacting motifs containing 1 pseudogene
203228_at	0.0619	0.00395	3.54555	-1.83316	1.12543	PAFAH1B3	platelet activating factor acetylhydrolase 1b catalytic subunit 3
64371_at	0.0619	0.00396	-3.5441	-1.8357	-0.918959	SUGP2	SURP and G-patch domain containing 2
217919_s_at	0.0619	0.00396	3.54407	-1.83575	0.844989	MRPL42	mitochondrial ribosomal protein L42
200737_at	0.0619	0.00396	3.54369	-1.83641	1.42179	PGK1	phosphoglycerate kinase 1
217221_x_at	0.0619	0.00397	-3.54315	-1.83737	-0.517004	RBM10	RNA binding motif protein 10
209352_s_at	0.0619	0.00397	-3.54301	-1.83761	-0.986636	SIN3B	SIN3 transcription regulator family member B
209159_s_at	0.0619	0.00397	-3.54268	-1.83819	-1.28689	NDRG4	NDRG family member 4
212632_at	0.0619	0.00397	-3.54248	-1.83854	-0.589419	STX7	syntaxin 7
218254_s_at	0.0619	0.00397	3.5422	-1.83903	1.20488	SAR1B	secretion associated Ras related GTPase 1B
204784_s_at	0.0619	0.00398	-3.54148	-1.8403	-1.34034	MLF1	myeloid leukemia factor 1
202399_s_at	0.0619	0.00398	3.54142	-1.84041	0.562926	C15orf38-AP3S2///AP3S2	C15orf38-AP3S2 readthrough///adaptor related protein complex 3 sigma 2 subunit
216953_s_at	0.0619	0.00398	-3.5413	-1.84063	-2.26841	WT1	Wilms tumor 1
218372_at	0.0619	0.00398	-3.5413	-1.84063	-0.491726	MED9	mediator complex subunit 9
201287_s_at	0.062	0.00399	3.53991	-1.84306	2.11184	SDC1	syndecan 1
204577_s_at	0.062	0.00399	-3.53981	-1.84324	-1.04955	CLUAP1	clusterin associated protein 1
217783_s_at	0.062	0.004	-3.53912	-1.84445	-0.600537	YPEL5	yippee like 5
218664_at	0.0621	0.00401	3.5375	-1.8473	0.59511	MECR	mitochondrial trans-2-enoyl-CoA reductase
200886_s_at	0.0621	0.00401	3.53708	-1.84804	0.59774	PGAM1	phosphoglycerate mutase 1
220127_s_at	0.0621	0.00401	-3.53687	-1.8484	-0.502042	FBXL12	F-box and leucine rich repeat protein 12
219551_at	0.0622	0.00402	3.53606	-1.84984	0.957612	EAF2	ELL associated factor 2
209894_at	0.0622	0.00402	-3.53565	-1.85054	-2.10227	LEPROT///LEPR	leptin receptor overlapping transcript///leptin receptor
213844_at	0.0622	0.00403	-3.53452	-1.85253	-1.49234	HOXA5	homeobox A5
212707_s_at	0.0622	0.00403	-3.53446	-1.85264	-0.855951	RASA4B///RASA4CP///RASA4	RAS p21 protein activator 4B///RAS p21 protein activator 4C, pseudogene///RAS p21 protein activator 4
201459_at	0.0624	0.00405	3.53212	-1.85676	0.700366	RUVBL2	RuvB like AAA ATPase 2
205851_at	0.0624	0.00405	-3.53211	-1.85678	-0.867099	NME6	NME/NM23 nucleoside diphosphate kinase 6
212706_at	0.0624	0.00405	-3.532	-1.85697	-1.68384	LOC102724229///RASA4B///RASA4	uncharacterized LOC102724229///RAS p21 protein activator 4B///RAS p21 protein activator 4
200598_s_at	0.0624	0.00405	3.53185	-1.85722	0.909418	MIR3652///HSP90B1	microRNA 3652///heat shock protein 90 beta family member 1
206067_s_at	0.0624	0.00405	-3.53134	-1.85812	-3.29251	WT1	Wilms tumor 1
213178_s_at	0.0624	0.00406	-3.53086	-1.85897	-0.476491	MAPK8IP3	mitogen-activated protein kinase 8 interacting protein 3
211774_s_at	0.0624	0.00406	3.53039	-1.8598	0.734863	MMACHC	methylmalonic aciduria (cobalamin deficiency) cblC type, with homocystinuria
205663_at	0.0624	0.00407	-3.52991	-1.86065	-1.11372	PCBP3	poly(rC) binding protein 3
203538_at	0.0624	0.00407	-3.52939	-1.86155	-0.968126	CAMLG	calcium modulating ligand
212832_s_at	0.0625	0.00408	3.52815	-1.86373	0.412263	CKAP5	cytoskeleton associated protein 5
210131_x_at	0.0626	0.00408	3.52754	-1.8648	0.551844	SDHC	succinate dehydrogenase complex subunit C
213762_x_at	0.0626	0.00409	-3.52662	-1.86642	-0.691853	LOC101928747///RBMX///SNORD61	uncharacterized LOC101928747///RNA binding motif protein, X-linked///small nucleolar RNA, C/D box 61
200039_s_at	0.0626	0.00409	3.52635	-1.8669	0.617086	PSMB2	proteasome subunit beta 2
218782_s_at	0.0626	0.00409	3.52617	-1.86722	1.13667	ATAD2	ATPase family, AAA domain containing 2
215058_at	0.0627	0.0041	-3.52502	-1.86924	-1.29035	DENND5B	DENN domain containing 5B
215369_at	0.0628	0.00411	-3.52354	-1.87184	-0.671825
201650_at	0.0628	0.00411	3.52353	-1.87186	1.44527	KRT19	keratin 19
201122_x_at	0.0628	0.00412	3.52298	-1.87282	1.07779	EIF5A	eukaryotic translation initiation factor 5A
207655_s_at	0.0629	0.00413	3.52163	-1.8752	1.61461	BLNK	B-cell linker
221569_at	0.0629	0.00413	-3.52158	-1.87529	-0.716858	AHI1	Abelson helper integration site 1
219379_x_at	0.063	0.00414	-3.51977	-1.87847	-0.494619	ZNF358	zinc finger protein 358
213531_s_at	0.0631	0.00415	-3.51928	-1.87932	-0.682262	RAB3GAP1	RAB3 GTPase activating protein catalytic subunit 1
201297_s_at	0.0632	0.00416	3.51802	-1.88155	0.737568	MOB1A	MOB kinase activator 1A
204801_s_at	0.0632	0.00416	-3.51714	-1.88308	-0.43097	DHRS12	dehydrogenase/reductase 12
219670_at	0.0633	0.00417	-3.51598	-1.88513	-1.24783	BEND5	BEN domain containing 5
47608_at	0.0635	0.00418	-3.51434	-1.88801	-0.458363	TJAP1	tight junction associated protein 1
212209_at	0.0636	0.0042	-3.513	-1.89037	-0.803326	MED13L	mediator complex subunit 13 like
222101_s_at	0.0639	0.00422	-3.5101	-1.89548	-1.99396	DCHS1	dachsous cadherin-related 1
210046_s_at	0.0639	0.00422	3.50967	-1.89623	1.67807	IDH2	isocitrate dehydrogenase (NADP(+)) 2, mitochondrial
200966_x_at	0.0639	0.00423	3.50874	-1.89786	0.694277	ALDOA	aldolase, fructose-bisphosphate A
202410_x_at	0.064	0.00424	-3.50787	-1.89939	-1.61983	INS-IGF2///IGF2	INS-IGF2 readthrough///insulin like growth factor 2
218126_at	0.064	0.00424	3.50783	-1.89946	0.54895	RMDN3	regulator of microtubule dynamics 3
222043_at	0.0641	0.00425	-3.50624	-1.90226	-1.93888	CLU	clusterin
218913_s_at	0.0644	0.00428	3.50271	-1.90846	0.94429	GMIP	GEM interacting protein
202543_s_at	0.0644	0.00428	3.50267	-1.90854	0.967285	GMFB	glia maturation factor beta
208696_at	0.0644	0.00428	3.50261	-1.90865	0.865813	CCT5	chaperonin containing TCP1 subunit 5
202227_s_at	0.0645	0.00428	-3.50162	-1.91039	-0.640764	BRD8	bromodomain containing 8
206003_at	0.0645	0.00429	-3.50106	-1.91137	-1.05318	CEP135	centrosomal protein 135
221288_at	0.0645	0.00429	-3.50078	-1.91187	-1.47908	GPR22	G protein-coupled receptor 22
217707_x_at	0.0645	0.00429	-3.5004	-1.91253	-0.616343	SMARCA2	SWI/SNF related, matrix associated, actin dependent regulator of chromatin, subfamily a, member 2
208156_x_at	0.0646	0.00431	3.49895	-1.91508	1.09673	EPPK1	epiplakin 1
209025_s_at	0.0646	0.00431	3.4985	-1.91588	1.28251	SYNCRIP	synaptotagmin binding cytoplasmic RNA interacting protein
205256_at	0.0646	0.00431	-3.49839	-1.91606	-0.370429	ZBTB39	zinc finger and BTB domain containing 39
209796_s_at	0.0647	0.00432	3.49753	-1.91759	0.756789	CNPY2	canopy FGF signaling regulator 2
203511_s_at	0.0647	0.00432	3.49688	-1.91872	0.702898	TRAPPC3	trafficking protein particle complex 3
201520_s_at	0.0648	0.00433	3.49597	-1.92032	0.671508	GRSF1	G-rich RNA sequence binding factor 1
202647_s_at	0.065	0.00436	3.49225	-1.92687	1.18277	NRAS	neuroblastoma RAS viral oncogene homolog
213035_at	0.065	0.00436	-3.49211	-1.92711	-0.764024	ANKRD28	ankyrin repeat domain 28
204407_at	0.065	0.00436	3.49209	-1.92715	0.972764	TTF2	transcription termination factor 2
219708_at	0.065	0.00436	-3.492	-1.92731	-0.509796	NT5M	5',3'-nucleotidase, mitochondrial
214214_s_at	0.065	0.00436	3.49169	-1.92785	1.10127	C1QBP	complement C1q binding protein
204134_at	0.065	0.00437	-3.49053	-1.92989	-1.35049	PDE2A	phosphodiesterase 2A
209185_s_at	0.065	0.00438	-3.48946	-1.93177	-2.01103	IRS2	insulin receptor substrate 2
204028_s_at	0.065	0.00438	-3.48939	-1.93189	-0.655079	RABGAP1	RAB GTPase activating protein 1
200640_at	0.065	0.00438	3.48917	-1.93228	0.491799	YWHAZ	tyrosine 3-monooxygenase/tryptophan 5-monooxygenase activation protein zeta
219622_at	0.065	0.00439	3.48814	-1.9341	1.14524	RAB20	RAB20, member RAS oncogene family
212048_s_at	0.065	0.00439	3.48806	-1.93424	0.795766	YARS	tyrosyl-tRNA synthetase
219439_at	0.065	0.00439	3.48799	-1.93437	1.49815	C1GALT1	core 1 synthase, glycoprotein-N-acetylgalactosamine 3-beta-galactosyltransferase 1
210293_s_at	0.065	0.0044	3.48778	-1.93474	1.05732	SEC23B	Sec23 homolog B, coat complex II component
210247_at	0.065	0.0044	-3.48745	-1.9353	-1.07674	SYN2	synapsin II
208708_x_at	0.065	0.00441	3.48669	-1.93666	0.61513	EIF5	eukaryotic translation initiation factor 5
212811_x_at	0.065	0.00441	-3.48613	-1.93763	-1.22105	SLC1A4	solute carrier family 1 member 4
211750_x_at	0.065	0.00441	3.48587	-1.93808	0.454785	TUBA1C	tubulin alpha 1c
212415_at	0.065	0.00441	3.48581	-1.93819	1.19519	2020-09-06	septin 6
222200_s_at	0.065	0.00441	-3.48567	-1.93844	-0.44328	BSDC1	BSD domain containing 1
218424_s_at	0.065	0.00442	3.48516	-1.93934	2.11617	STEAP3	STEAP3 metalloreductase
35846_at	0.065	0.00442	-3.48486	-1.93987	-1.0897	THRA	thyroid hormone receptor, alpha
212891_s_at	0.065	0.00442	3.48456	-1.9404	0.428546	GADD45GIP1	GADD45G interacting protein 1
202195_s_at	0.065	0.00443	3.48371	-1.94189	1.08864	TMED5	transmembrane p24 trafficking protein 5
211988_at	0.065	0.00443	-3.48351	-1.94225	-0.460008	SMARCE1	SWI/SNF related, matrix associated, actin dependent regulator of chromatin, subfamily e, member 1
221499_s_at	0.065	0.00443	-3.48339	-1.94246	-1.45114	STX16	syntaxin 16
204443_at	0.065	0.00443	3.48315	-1.94287	1.0455	ARSA	arylsulfatase A
204493_at	0.065	0.00443	3.48315	-1.94288	1.18431	BID	BH3 interacting domain death agonist
216259_at	0.065	0.00444	-3.48252	-1.94398	-0.697451	LOC100506699	uncharacterized LOC100506699
220036_s_at	0.065	0.00444	-3.48243	-1.94415	-0.818093	LMBR1L	limb development membrane protein 1 like
203378_at	0.065	0.00444	-3.48241	-1.94419	-0.813889	PCF11	PCF11 cleavage and polyadenylation factor subunit
212375_at	0.065	0.00444	-3.48236	-1.94426	-0.606669	EP400	E1A binding protein p400
201611_s_at	0.065	0.00444	3.48196	-1.94497	0.452728	ICMT	isoprenylcysteine carboxyl methyltransferase
200656_s_at	0.065	0.00444	3.48194	-1.94501	1.03201	P4HB	prolyl 4-hydroxylase subunit beta
218505_at	0.0652	0.00446	-3.47993	-1.94855	-0.663508	WDR59	WD repeat domain 59
218320_s_at	0.0652	0.00446	3.47956	-1.94919	0.621529	NDUFB11	NADH:ubiquinone oxidoreductase subunit B11
215175_at	0.0652	0.00446	-3.47944	-1.9494	-1.59972	PCNX1	pecanex homolog 1 (Drosophila)
205741_s_at	0.0652	0.00447	-3.47902	-1.95014	-0.57195	DTNA	dystrobrevin alpha
210007_s_at	0.0652	0.00447	3.47894	-1.95029	0.910872	GPD2	glycerol-3-phosphate dehydrogenase 2
209642_at	0.0653	0.00448	3.47807	-1.95181	1.78803	BUB1	BUB1 mitotic checkpoint serine/threonine kinase
204651_at	0.0653	0.00448	-3.47758	-1.95267	-0.802461	NRF1	nuclear respiratory factor 1
204485_s_at	0.0653	0.00449	3.47694	-1.9538	1.24411	TOM1L1	target of myb1 like 1 membrane trafficking protein
209276_s_at	0.0653	0.00449	3.47673	-1.95418	1.01451	GLRX	glutaredoxin
209635_at	0.0653	0.00449	3.47638	-1.95479	0.855388	AP1S1	adaptor related protein complex 1 sigma 1 subunit
205684_s_at	0.0653	0.00449	-3.47619	-1.95512	-0.894269	DENND4C	DENN domain containing 4C
203354_s_at	0.0654	0.0045	-3.47508	-1.95707	-1.29569	PSD3	pleckstrin and Sec7 domain containing 3
219650_at	0.0654	0.00451	3.47404	-1.95891	0.827334	ERCC6L	ERCC excision repair 6 like, spindle assembly checkpoint helicase
214030_at	0.0654	0.00451	-3.47383	-1.95928	-1.27713	CRYBG3	crystallin beta-gamma domain containing 3
204678_s_at	0.0654	0.00451	3.47371	-1.95949	1.17229	KCNK1	potassium two pore domain channel subfamily K member 1
221690_s_at	0.0654	0.00452	3.47339	-1.96005	2.46347	NLRP2	NLR family pyrin domain containing 2
219477_s_at	0.0654	0.00452	-3.47334	-1.96014	-0.931745	LOC101930578///MRPS31P5///THSD1	uncharacterized LOC101930578///mitochondrial ribosomal protein S31 pseudogene 5///thrombospondin type 1 domain containing 1
216330_s_at	0.0654	0.00452	-3.4726	-1.96145	-0.609956	POU6F1	POU class 6 homeobox 1
222266_at	0.0654	0.00452	-3.47252	-1.96158	-0.877775
222075_s_at	0.0654	0.00453	3.47129	-1.96375	0.712467	OAZ3	ornithine decarboxylase antizyme 3
204137_at	0.0654	0.00454	-3.47086	-1.96451	-1.10775	GPR137B	G protein-coupled receptor 137B
219785_s_at	0.0654	0.00454	3.4706	-1.96497	0.746835	C16orf95	chromosome 16 open reading frame 95
210486_at	0.0654	0.00454	-3.47053	-1.96509	-0.551138	ANKMY1	ankyrin repeat and MYND domain containing 1
207756_at	0.0654	0.00454	-3.47031	-1.96547	-0.373841
212299_at	0.0655	0.00455	-3.46971	-1.96653	-0.914932	NEK9	NIMA related kinase 9
212778_at	0.0656	0.00456	-3.46821	-1.96917	-0.5348	PACS2	phosphofurin acidic cluster sorting protein 2
214063_s_at	0.0657	0.00457	-3.46735	-1.97068	-0.450262	TF	transferrin
221207_s_at	0.0657	0.00457	-3.46642	-1.97231	-2.01671	NBEA	neurobeachin
202722_s_at	0.0658	0.00459	3.46505	-1.97473	1.35669	GFPT1	glutamine--fructose-6-phosphate transaminase 1
208832_at	0.0658	0.00459	-3.46501	-1.9748	-0.499727	ATXN10	ataxin 10
217862_at	0.0658	0.00459	-3.46414	-1.97634	-1.12063	PIAS1	protein inhibitor of activated STAT 1
213497_at	0.0658	0.00459	-3.46411	-1.97638	-0.712197	ABTB2	ankyrin repeat and BTB domain containing 2
209217_s_at	0.0661	0.00461	-3.46198	-1.98014	-0.476149	WDR45	WD repeat domain 45
221192_x_at	0.0661	0.00462	-3.46125	-1.98142	-0.681127	MFSD11	major facilitator superfamily domain containing 11
212677_s_at	0.0661	0.00462	-3.46094	-1.98197	-1.32337	CEP68	centrosomal protein 68
201449_at	0.0661	0.00463	-3.46034	-1.98302	-0.832361	TIA1	TIA1 cytotoxic granule-associated RNA binding protein
208415_x_at	0.0662	0.00464	-3.45904	-1.9853	-0.636456	ING1	inhibitor of growth family member 1
204803_s_at	0.0662	0.00464	-3.45892	-1.98552	-1.4368	RRAD	RRAD, Ras related glycolysis inhibitor and calcium channel regulator
202352_s_at	0.0663	0.00464	3.45841	-1.98642	0.661973	PSMD12	proteasome 26S subunit, non-ATPase 12
219557_s_at	0.0663	0.00465	-3.45743	-1.98814	-0.867217	NRIP3	nuclear receptor interacting protein 3
222352_at	0.0663	0.00466	-3.45668	-1.98946	-0.637111	FBXO31	F-box protein 31
221249_s_at	0.0663	0.00466	-3.45626	-1.9902	-1.07845	FAM117A	family with sequence similarity 117 member A
209444_at	0.0663	0.00467	3.4557	-1.99119	0.921442	RAP1GDS1	Rap1 GTPase-GDP dissociation stimulator 1
43427_at	0.0663	0.00467	-3.45564	-1.99129	-2.00943	ACACB	acetyl-CoA carboxylase beta
212365_at	0.0663	0.00467	3.45559	-1.99139	1.05821	MYO1B	myosin IB
36475_at	0.0663	0.00467	3.45516	-1.99214	0.602432	GCAT	glycine C-acetyltransferase
209735_at	0.0663	0.00468	-3.45436	-1.99355	-2.00348	ABCG2	ATP binding cassette subfamily G member 2 (Junior blood group)
201422_at	0.0663	0.00468	3.45427	-1.99371	2.28636	IFI30///PIK3R2	IFI30, lysosomal thiol reductase///phosphoinositide-3-kinase regulatory subunit 2
216640_s_at	0.0663	0.00468	3.45384	-1.99446	0.966842	PDIA6	protein disulfide isomerase family A member 6
204052_s_at	0.0663	0.00468	-3.45354	-1.99499	-3.00306	SFRP4	secreted frizzled related protein 4
212406_s_at	0.0663	0.00469	-3.45344	-1.99517	-0.788979	PCMTD2	protein-L-isoaspartate (D-aspartate) O-methyltransferase domain containing 2
218799_at	0.0663	0.00469	3.45335	-1.99532	0.634108	GPN2	GPN-loop GTPase 2
209120_at	0.0663	0.00469	-3.45311	-1.99574	-1.3823	NR2F2	nuclear receptor subfamily 2 group F member 2
212068_s_at	0.0665	0.00471	-3.45121	-1.9991	-0.506673	PRRC2B	proline rich coiled-coil 2B
219219_at	0.0665	0.00471	3.4506	-2.00017	0.605155	TMEM160	transmembrane protein 160
202041_s_at	0.0666	0.00471	3.45008	-2.00107	0.597054	FIBP	FGF1 intracellular binding protein
217942_at	0.0666	0.00472	3.44965	-2.00185	0.442385	MRPS35	mitochondrial ribosomal protein S35
218724_s_at	0.0666	0.00472	-3.44902	-2.00295	-1.12485	TGIF2	TGFB induced factor homeobox 2
211374_x_at	0.0668	0.00474	-3.44692	-2.00665	-0.698785
201582_at	0.0668	0.00475	3.44615	-2.008	1.0153	SEC23B	Sec23 homolog B, coat complex II component
220578_at	0.0668	0.00475	-3.44602	-2.00823	-0.684628	ADAMTSL4	ADAMTS like 4
212639_x_at	0.0668	0.00476	3.44541	-2.0093	0.445686	TUBA1B	tubulin alpha 1b
202484_s_at	0.0668	0.00476	3.44539	-2.00933	0.922088	MBD2	methyl-CpG binding domain protein 2
207191_s_at	0.0668	0.00476	-3.44494	-2.01014	-1.67622	ISLR	immunoglobulin superfamily containing leucine rich repeat
201797_s_at	0.0668	0.00476	3.4445	-2.0109	0.607637	VARS	valyl-tRNA synthetase
210050_at	0.0668	0.00477	3.44437	-2.01113	0.520486	TPI1	triosephosphate isomerase 1
205200_at	0.0669	0.00477	-3.44356	-2.01256	-2.14924	EXOSC7///CLEC3B	exosome component 7///C-type lectin domain family 3 member B
205562_at	0.0669	0.00478	3.4425	-2.01442	0.363626	RPP38	ribonuclease P/MRP subunit p38
209921_at	0.0669	0.00478	3.44225	-2.01488	2.41045	SLC7A11	solute carrier family 7 member 11
219582_at	0.0669	0.00479	3.44191	-2.01547	0.556345	OGFRL1	opioid growth factor receptor like 1
209509_s_at	0.0669	0.00479	3.4419	-2.01548	0.513472	DPAGT1	dolichyl-phosphate N-acetylglucosaminephosphotransferase 1
202691_at	0.0669	0.00479	3.44173	-2.01578	0.650567	SNRPD1	small nuclear ribonucleoprotein D1 polypeptide
210149_s_at	0.0669	0.00479	3.44165	-2.01593	0.551461	ATP5H	ATP synthase, H+ transporting, mitochondrial Fo complex subunit D
212314_at	0.0671	0.00481	3.43985	-2.01909	2.09851	SEL1L3	SEL1L family member 3
210089_s_at	0.0671	0.00481	-3.43936	-2.01996	-1.16528	LAMA4	laminin subunit alpha 4
217499_x_at	0.0672	0.00482	3.43781	-2.02269	0.716586	OR7E37P	olfactory receptor family 7 subfamily E member 37 pseudogene
217348_x_at	0.0672	0.00483	-3.43758	-2.02309	-0.442882	ARHGEF15	Rho guanine nucleotide exchange factor 15
59375_at	0.0673	0.00483	-3.437	-2.02411	-1.41896	MYO15B	myosin XVB
204738_s_at	0.0673	0.00484	-3.43623	-2.02546	-0.587289	KRIT1	KRIT1, ankyrin repeat containing
218706_s_at	0.0673	0.00484	-3.43585	-2.02613	-0.6263	GRAMD3	GRAM domain containing 3
209680_s_at	0.0673	0.00484	3.43551	-2.02673	0.720071	KIFC1	kinesin family member C1
200803_s_at	0.0674	0.00485	3.43476	-2.02805	1.09813	TMBIM6	transmembrane BAX inhibitor motif containing 6
214205_x_at	0.0674	0.00486	3.43396	-2.02947	0.618444	GLRX3	glutaredoxin 3
203312_x_at	0.0675	0.00486	3.43346	-2.03035	0.543804	ARF6	ADP ribosylation factor 6
220143_x_at	0.0675	0.00487	-3.43226	-2.03246	-0.653429	LUC7L	LUC7 like
209107_x_at	0.0675	0.00488	-3.43198	-2.03295	-0.732989	NCOA1	nuclear receptor coactivator 1
217560_at	0.0675	0.00488	-3.43152	-2.03377	-0.45928	GGA1	golgi associated, gamma adaptin ear containing, ARF binding protein 1
221756_at	0.0675	0.00488	-3.43133	-2.0341	-0.907313	PIK3IP1	phosphoinositide-3-kinase interacting protein 1
214724_at	0.0675	0.00488	-3.43118	-2.03437	-1.72394	DIXDC1	DIX domain containing 1
222184_at	0.0675	0.00489	-3.43082	-2.03499	-0.753078	LINC00965	long intergenic non-protein coding RNA 965
219863_at	0.0676	0.0049	-3.42982	-2.03676	-1.88214	HERC5	HECT and RLD domain containing E3 ubiquitin protein ligase 5
212656_at	0.0677	0.0049	3.42915	-2.03794	0.506015	TSFM	Ts translation elongation factor, mitochondrial
218119_at	0.0677	0.00491	3.42866	-2.03879	0.816907	TIMM23B///TIMM23	translocase of inner mitochondrial membrane 23 homolog B///translocase of inner mitochondrial membrane 23
208561_at	0.0677	0.00491	-3.42853	-2.03902	-0.893351	ABCC9	ATP binding cassette subfamily C member 9
203327_at	0.0677	0.00491	3.42809	-2.0398	0.635468	IDE	insulin degrading enzyme
201696_at	0.0678	0.00493	-3.42638	-2.04281	-0.385196	SRSF4	serine and arginine rich splicing factor 4
203142_s_at	0.0678	0.00493	3.42605	-2.04339	0.58256	AP3B1	adaptor related protein complex 3 beta 1 subunit
219347_at	0.0678	0.00493	3.42604	-2.04341	0.724149	NUDT15	nudix hydrolase 15
204126_s_at	0.0678	0.00493	3.42585	-2.04374	1.17504	CDC45	cell division cycle 45
217906_at	0.0678	0.00494	-3.42538	-2.04457	-0.705688	KLHDC2	kelch domain containing 2
214358_at	0.0679	0.00495	3.4243	-2.04648	0.57766	ACACA	acetyl-CoA carboxylase alpha
215501_s_at	0.068	0.00496	3.42308	-2.04862	1.13501	DUSP10	dual specificity phosphatase 10
205704_s_at	0.0682	0.00498	3.42105	-2.05221	0.680146	ATP6V0A2	ATPase H+ transporting V0 subunit a2
218641_at	0.0682	0.00498	-3.42063	-2.05294	-1.15161	C11orf95	chromosome 11 open reading frame 95
201530_x_at	0.0682	0.00498	3.42033	-2.05348	0.670136	LOC101928634///SENP3-EIF4A1///SNORD10///SNORA48///SNORA67///EIF4A1	uncharacterized LOC101928634///SENP3-EIF4A1 readthrough (NMD candidate)///small nucleolar RNA, C/D box 10///small nucleolar RNA, H/ACA box 48///small nucleolar RNA, H/ACA box 67///eukaryotic translation initiation factor 4A1
212593_s_at	0.0683	0.00499	-3.41961	-2.05474	-0.928557	MIR4680///PDCD4	microRNA 4680///programmed cell death 4 (neoplastic transformation inhibitor)
221824_s_at	0.0683	0.00499	-3.41939	-2.05513	-0.930994	2020-03-08	membrane associated ring-CH-type finger 8
207711_at	0.0683	0.005	-3.41856	-2.0566	-0.741483	SOGA1	suppressor of glucose, autophagy associated 1
202450_s_at	0.0683	0.00501	-3.41783	-2.05788	-1.65808	CTSK	cathepsin K
212373_at	0.0683	0.00501	-3.41783	-2.05788	-0.792025	FEM1B	fem-1 homolog B
220651_s_at	0.0683	0.00501	3.41775	-2.05802	1.43211	MCM10	minichromosome maintenance 10 replication initiation factor
209881_s_at	0.0683	0.00501	-3.41698	-2.05937	-0.588206	LAT	linker for activation of T-cells
213645_at	0.0683	0.00501	-3.41694	-2.05945	-0.941049	ENOSF1	enolase superfamily member 1
218380_at	0.0683	0.00501	-3.4169	-2.0595	-1.958	LOC728392	uncharacterized LOC728392
50374_at	0.0683	0.00502	3.41625	-2.06065	0.377202	OXLD1	oxidoreductase like domain containing 1
207132_x_at	0.0684	0.00503	-3.41516	-2.06257	-0.569703	PFDN5	prefoldin subunit 5
204424_s_at	0.0684	0.00503	-3.41479	-2.06323	-2.59026	LMO3	LIM domain only 3
215754_at	0.0684	0.00504	-3.41456	-2.06364	-0.767263	SCARB2	scavenger receptor class B member 2
212435_at	0.0684	0.00504	-3.41429	-2.06412	-0.725992	TRIM33	tripartite motif containing 33
212949_at	0.0684	0.00504	3.41376	-2.06504	1.29961	NCAPH	non-SMC condensin I complex subunit H
219641_at	0.0685	0.00506	-3.41201	-2.06812	-1.21251	DET1	de-etiolated homolog 1 (Arabidopsis)
203311_s_at	0.0685	0.00506	3.4116	-2.06884	0.740039	ARF6	ADP ribosylation factor 6
205768_s_at	0.0685	0.00507	3.41147	-2.06907	1.54495	SLC27A2	solute carrier family 27 member 2
221725_at	0.0685	0.00507	-3.41134	-2.06931	-0.667948	WASF2	WAS protein family member 2
220486_x_at	0.0685	0.00507	3.41113	-2.06968	0.674325	LOC101928589///TMEM164	uncharacterized LOC101928589///transmembrane protein 164
203445_s_at	0.0685	0.00507	-3.41112	-2.0697	-0.58927	CTDSP2	CTD small phosphatase 2
215648_at	0.0686	0.00508	-3.41026	-2.07121	-0.955453
212376_s_at	0.0686	0.00508	-3.40982	-2.07198	-0.401974	EP400	E1A binding protein p400
211130_x_at	0.0686	0.00508	-3.40977	-2.07207	-0.444416	EDA	ectodysplasin A
202053_s_at	0.0686	0.00509	3.40909	-2.07328	1.1813	ALDH3A2	aldehyde dehydrogenase 3 family member A2
213007_at	0.0686	0.00509	3.40869	-2.07398	1.40896	FANCI	Fanconi anemia complementation group I
213090_s_at	0.0686	0.0051	-3.40821	-2.07482	-0.426595	TAF4	TATA-box binding protein associated factor 4
219144_at	0.0687	0.0051	-3.4078	-2.07555	-0.529558	DUSP26	dual specificity phosphatase 26 (putative)
211411_at	0.0687	0.00511	-3.40708	-2.07681	-0.379977
202868_s_at	0.0687	0.00511	3.40662	-2.07763	0.461369	POP4	POP4 homolog, ribonuclease P/MRP subunit
210048_at	0.0687	0.00512	3.40584	-2.079	0.538059	NAPG	NSF attachment protein gamma
209260_at	0.0687	0.00512	3.40579	-2.07908	1.86699	SFN	stratifin
213092_x_at	0.0688	0.00513	3.40481	-2.0808	0.540766	DNAJC9	DnaJ heat shock protein family (Hsp40) member C9
215208_x_at	0.0689	0.00514	-3.40394	-2.08234	-0.776549	RPL35A	ribosomal protein L35a
207332_s_at	0.0689	0.00514	3.40343	-2.08324	1.59743	TFRC	transferrin receptor
209034_at	0.0693	0.00519	-3.39853	-2.09187	-0.502449	PNRC1	proline rich nuclear receptor coactivator 1
200748_s_at	0.0693	0.00519	3.39846	-2.092	0.510479	FTH1	ferritin heavy chain 1
221962_s_at	0.0693	0.00519	3.39846	-2.092	0.915556	UBE2H	ubiquitin conjugating enzyme E2 H
212021_s_at	0.0693	0.00519	3.39842	-2.09206	1.60914	MKI67	marker of proliferation Ki-67
201776_s_at	0.0693	0.00519	3.39799	-2.09282	0.672689	EFCAB14	EF-hand calcium binding domain 14
213182_x_at	0.0693	0.0052	-3.3977	-2.09333	-1.66016	CDKN1C	cyclin dependent kinase inhibitor 1C
217833_at	0.0693	0.0052	-3.39764	-2.09344	-0.985698	SYNCRIP	synaptotagmin binding cytoplasmic RNA interacting protein
212294_at	0.0693	0.0052	-3.39761	-2.0935	-0.605175	GNG12	G protein subunit gamma 12
213218_at	0.0693	0.0052	-3.39744	-2.0938	-0.892592	ZSCAN26	zinc finger and SCAN domain containing 26
209710_at	0.0694	0.00521	-3.39636	-2.0957	-1.43102	GATA2	GATA binding protein 2
217659_at	0.0695	0.00522	-3.39512	-2.09788	-0.447186
207766_at	0.0695	0.00523	-3.39463	-2.09875	-1.01411	CDKL1	cyclin dependent kinase like 1
212607_at	0.0695	0.00523	-3.39439	-2.09917	-1.48843	AKT3	AKT serine/threonine kinase 3
220518_at	0.0696	0.00523	-3.39394	-2.09995	-1.86131	ABI3BP	ABI family member 3 binding protein
205034_at	0.0696	0.00524	3.39369	-2.1004	1.4489	CCNE2	cyclin E2
218884_s_at	0.0696	0.00524	3.3933	-2.10109	0.540647	GUF1	GUF1 homolog, GTPase
220800_s_at	0.0696	0.00525	3.39264	-2.10224	0.735559	TMOD3	tropomodulin 3
201842_s_at	0.0696	0.00525	-3.39224	-2.10296	-2.22271	EFEMP1	EGF containing fibulin like extracellular matrix protein 1
219949_at	0.0699	0.00527	-3.39	-2.10691	-1.76668	LRRC2	leucine rich repeat containing 2
222104_x_at	0.0701	0.00529	-3.38776	-2.11084	-0.796882	GTF2H3	general transcription factor IIH subunit 3
208985_s_at	0.0702	0.0053	3.387	-2.11219	0.663627	EIF3J	eukaryotic translation initiation factor 3 subunit J
202328_s_at	0.0702	0.00531	-3.38633	-2.11336	-0.986326	LOC101930075///PKD1	polycystin-1-like///polycystin 1, transient receptor potential channel interacting
222282_at	0.0703	0.00532	-3.38498	-2.11575	-0.740113
219336_s_at	0.0703	0.00532	3.38483	-2.11602	0.497746	ASCC1	activating signal cointegrator 1 complex subunit 1
203917_at	0.0704	0.00533	3.38426	-2.11701	1.49609	CXADR	coxsackie virus and adenovirus receptor
204464_s_at	0.0704	0.00534	-3.38346	-2.11843	-1.61377	EDNRA	endothelin receptor type A
212288_at	0.0704	0.00534	-3.38317	-2.11894	-1.07404	FNBP1	formin binding protein 1
206662_at	0.0704	0.00534	3.38303	-2.11919	0.947782	GLRX	glutaredoxin
221943_x_at	0.0706	0.00536	-3.38148	-2.12192	-0.382446	RPL38	ribosomal protein L38
48825_at	0.0706	0.00536	-3.38114	-2.12252	-0.475188	ING4	inhibitor of growth family member 4
217989_at	0.0706	0.00537	-3.38028	-2.12403	-1.17147	HSD17B11	hydroxysteroid 17-beta dehydrogenase 11
209613_s_at	0.0707	0.00538	-3.37892	-2.12643	-2.90266	ADH1B	alcohol dehydrogenase 1B (class I), beta polypeptide
217901_at	0.0707	0.00539	3.37855	-2.12707	2.16083	DSG2	desmoglein 2
219002_at	0.0707	0.00539	3.37813	-2.12782	0.981898	FASTKD1	FAST kinase domains 1
46256_at	0.0707	0.00539	-3.37796	-2.12811	-0.387801	SPSB3	splA/ryanodine receptor domain and SOCS box containing 3
215554_at	0.0707	0.00539	-3.37792	-2.12818	-1.11802	GPLD1	glycosylphosphatidylinositol specific phospholipase D1
221235_s_at	0.0707	0.0054	-3.37743	-2.12904	-0.550898	TGFBRAP1	transforming growth factor beta receptor associated protein 1
211899_s_at	0.0707	0.0054	3.37727	-2.12933	0.5956	TRAF4	TNF receptor associated factor 4
215445_x_at	0.0707	0.0054	-3.37685	-2.13007	-0.55033
214736_s_at	0.0707	0.00541	-3.37617	-2.13128	-0.809027	ADD1	adducin 1
205622_at	0.0707	0.00541	3.37602	-2.13154	0.841229	SMPD2	sphingomyelin phosphodiesterase 2
201129_at	0.0707	0.00541	-3.37601	-2.13155	-0.938568	SRSF7	serine and arginine rich splicing factor 7
217642_at	0.0708	0.00542	-3.37544	-2.13255	-0.535313	RNF40	ring finger protein 40
203408_s_at	0.0708	0.00542	-3.3748	-2.13369	-1.56643	SATB1	SATB homeobox 1
212254_s_at	0.0708	0.00543	-3.37452	-2.13417	-1.51143	DST	dystonin
212100_s_at	0.0708	0.00543	-3.37367	-2.13568	-0.483742	POLDIP3	DNA polymerase delta interacting protein 3
212443_at	0.0708	0.00544	3.37353	-2.13592	0.6089	NBEAL2	neurobeachin like 2
213992_at	0.0708	0.00544	-3.37328	-2.13636	-2.93089	COL4A6	collagen type IV alpha 6 chain
202775_s_at	0.0708	0.00544	-3.37304	-2.13679	-0.584604	SFSWAP	splicing factor SWAP homolog
213027_at	0.0709	0.00545	-3.37221	-2.13825	-0.692843	TROVE2	TROVE domain family member 2
201096_s_at	0.071	0.00546	3.37099	-2.1404	0.748805	ARF4	ADP ribosylation factor 4
218982_s_at	0.071	0.00547	3.37054	-2.14119	0.626126	MRPS17	mitochondrial ribosomal protein S17
215255_at	0.0713	0.00549	-3.36839	-2.14498	-0.736088	IGSF9B	immunoglobulin superfamily member 9B
204140_at	0.0713	0.00549	-3.36813	-2.14543	-1.17885	TPST1	tyrosylprotein sulfotransferase 1
203373_at	0.0713	0.00549	-3.36796	-2.14573	-2.05765	SOCS2	suppressor of cytokine signaling 2
213482_at	0.0713	0.0055	-3.36712	-2.14722	-0.518996	DOCK3	dedicator of cytokinesis 3
215718_s_at	0.0713	0.0055	-3.36708	-2.14729	-0.657431	PHF3	PHD finger protein 3
210561_s_at	0.0713	0.0055	-3.36693	-2.14755	-0.907328	WSB1	WD repeat and SOCS box containing 1
221430_s_at	0.0713	0.0055	-3.36681	-2.14777	-0.660399	RNF146	ring finger protein 146
202530_at	0.0713	0.00552	-3.36561	-2.14987	-0.555758	MAPK14	mitogen-activated protein kinase 14
209993_at	0.0713	0.00552	-3.36527	-2.15049	-1.25792	ABCB1	ATP binding cassette subfamily B member 1
208818_s_at	0.0713	0.00552	3.36504	-2.15089	0.643685	COMT	catechol-O-methyltransferase
214687_x_at	0.0713	0.00553	3.36469	-2.1515	0.709965	ALDOA	aldolase, fructose-bisphosphate A
215212_at	0.0713	0.00553	-3.36466	-2.15156	-0.922116
213694_at	0.0714	0.00554	-3.36317	-2.15418	-0.92531	RSBN1	round spermatid basic protein 1
210110_x_at	0.0714	0.00555	-3.36239	-2.15555	-0.470017	HNRNPH3	heterogeneous nuclear ribonucleoprotein H3
204497_at	0.0714	0.00555	-3.36217	-2.15594	-1.31887	ADCY9	adenylate cyclase 9
57588_at	0.0714	0.00555	-3.36216	-2.15597	-2.23887	SLC24A3	solute carrier family 24 member 3
208767_s_at	0.0714	0.00555	3.36216	-2.15597	1.72288	LAPTM4B	lysosomal protein transmembrane 4 beta
208238_x_at	0.0714	0.00555	-3.36198	-2.15628	-0.579757
220741_s_at	0.0714	0.00555	3.36193	-2.15637	0.76689	PPA2	pyrophosphatase (inorganic) 2
209612_s_at	0.0715	0.00556	-3.36107	-2.15788	-2.95845	ADH1B	alcohol dehydrogenase 1B (class I), beta polypeptide
203848_at	0.0715	0.00557	-3.36053	-2.15883	-0.417703	AKAP8	A-kinase anchoring protein 8
201498_at	0.0715	0.00557	-3.3604	-2.15906	-0.54908	USP7	ubiquitin specific peptidase 7
200606_at	0.0715	0.00558	3.35986	-2.16002	2.20002	DSP	desmoplakin
201127_s_at	0.0715	0.00558	3.35968	-2.16034	0.815069	ACLY	ATP citrate lyase
200987_x_at	0.0715	0.00558	3.35933	-2.16096	0.947738	PSME3	proteasome activator subunit 3
203249_at	0.0715	0.00558	-3.35928	-2.16103	-1.13923	EZH1	enhancer of zeste 1 polycomb repressive complex 2 subunit
201636_at	0.0715	0.00559	-3.35899	-2.16155	-0.710054	FXR1	FMR1 autosomal homolog 1
203227_s_at	0.0715	0.00559	-3.35874	-2.16198	-0.633624	TSPAN31	tetraspanin 31
210701_at	0.0718	0.00562	-3.35572	-2.16732	-1.04444	CFDP1	craniofacial development protein 1
211760_s_at	0.0719	0.00563	3.35473	-2.16905	0.793815	VAMP4	vesicle associated membrane protein 4
212165_at	0.0721	0.00565	3.35324	-2.17168	0.500807	TMEM183B///TMEM183A	transmembrane protein 183B///transmembrane protein 183A
210904_s_at	0.0722	0.00566	3.35217	-2.17357	1.23851	IL13RA1	interleukin 13 receptor subunit alpha 1
218671_s_at	0.0722	0.00566	3.3517	-2.17439	0.617895	ATPIF1	ATPase inhibitory factor 1
220233_at	0.0722	0.00566	-3.35154	-2.17468	-1.63528	FBXO17	F-box protein 17
219173_at	0.0722	0.00567	-3.35107	-2.1755	-1.47904	MYO15B	myosin XVB
216799_at	0.0723	0.00568	-3.35012	-2.17718	-0.833896
209448_at	0.0723	0.00568	3.34985	-2.17765	1.36468	HTATIP2	HIV-1 Tat interactive protein 2
221664_s_at	0.0723	0.00569	3.34948	-2.17831	1.33413	F11R	F11 receptor
201760_s_at	0.0723	0.00569	3.34907	-2.17904	1.0523	WSB2	WD repeat and SOCS box containing 2
218792_s_at	0.0723	0.00569	3.34892	-2.17929	1.55015	BSPRY	B-box and SPRY domain containing
222345_at	0.0723	0.00569	-3.34867	-2.17974	-0.389279	EMC10	ER membrane protein complex subunit 10
201274_at	0.0723	0.0057	3.34826	-2.18046	0.607257	PSMA5	proteasome subunit alpha 5
207068_at	0.0724	0.00571	-3.34735	-2.18206	-0.92659	ZFP37	ZFP37 zinc finger protein
207373_at	0.0724	0.00571	-3.3467	-2.18321	-1.76809	HOXD10	homeobox D10
218265_at	0.0724	0.00572	-3.34628	-2.18395	-0.89408	SECISBP2	SECIS binding protein 2
219206_x_at	0.0725	0.00573	-3.34561	-2.18514	-0.612038	TMBIM4	transmembrane BAX inhibitor motif containing 4
219202_at	0.0725	0.00573	3.34497	-2.18627	0.970603	RHBDF2	rhomboid 5 homolog 2
204516_at	0.0726	0.00575	-3.34357	-2.18873	-0.344051	ATXN7	ataxin 7
220396_at	0.0726	0.00575	-3.34317	-2.18943	-0.349899	SLC35E3	solute carrier family 35 member E3
215380_s_at	0.0726	0.00575	3.34316	-2.18945	0.965481	GGCT	gamma-glutamylcyclotransferase
221506_s_at	0.0726	0.00576	-3.3428	-2.19008	-0.511449	TNPO2	transportin 2
209075_s_at	0.0726	0.00576	-3.3426	-2.19043	-0.532438	ISCU	iron-sulfur cluster assembly enzyme
217965_s_at	0.0726	0.00576	-3.34211	-2.19131	-0.406164	SAP30BP	SAP30 binding protein
208657_s_at	0.0726	0.00577	3.34199	-2.19151	0.769683	2020-09-09	septin 9
215033_at	0.0727	0.00577	3.34114	-2.19301	1.47669	TM4SF1	transmembrane 4 L six family member 1
213571_s_at	0.0727	0.00578	3.34081	-2.19359	0.731201	EIF4E2	eukaryotic translation initiation factor 4E family member 2
202214_s_at	0.0727	0.00578	-3.3407	-2.19378	-0.582034	CUL4B	cullin 4B
202792_s_at	0.0727	0.00578	-3.34063	-2.19392	-0.583654	PPP6R2	protein phosphatase 6 regulatory subunit 2
211566_x_at	0.0727	0.00578	-3.34028	-2.19452	-0.398255	BRE	brain and reproductive organ-expressed (TNFRSF1A modulator)
219044_at	0.0728	0.0058	-3.33877	-2.19719	-0.907645	THNSL2	threonine synthase like 2
217715_x_at	0.0728	0.0058	-3.33868	-2.19734	-0.518046
200920_s_at	0.0728	0.0058	-3.33866	-2.19738	-1.12632	BTG1	BTG anti-proliferation factor 1
212997_s_at	0.0728	0.0058	-3.33843	-2.19778	-0.401625	TLK2	tousled like kinase 2
204343_at	0.0728	0.00581	-3.33806	-2.19843	-0.784536	ABCA3	ATP binding cassette subfamily A member 3
216836_s_at	0.0728	0.00581	3.33754	-2.19936	0.7983	ERBB2	erb-b2 receptor tyrosine kinase 2
204336_s_at	0.0729	0.00582	3.33672	-2.2008	0.935959	RGS19	regulator of G-protein signaling 19
53991_at	0.0729	0.00583	-3.33574	-2.20252	-1.31382	DENND2A	DENN domain containing 2A
202057_at	0.0729	0.00583	-3.33566	-2.20266	-0.94761	KPNA1	karyopherin subunit alpha 1
204415_at	0.0731	0.00585	3.33423	-2.20518	1.50945	IFI6	interferon alpha inducible protein 6
204096_s_at	0.0733	0.00587	-3.33224	-2.20869	-0.347619	ELL	elongation factor for RNA polymerase II
202887_s_at	0.0734	0.00588	3.33132	-2.21032	1.66171	DDIT4	DNA damage inducible transcript 4
211733_x_at	0.0735	0.0059	3.32981	-2.21299	0.684623	SCP2	sterol carrier protein 2
201579_at	0.0735	0.0059	3.3296	-2.21335	1.51547	FAT1	FAT atypical cadherin 1
212175_s_at	0.0735	0.0059	3.32935	-2.21379	0.857437	AK2	adenylate kinase 2
214453_s_at	0.0735	0.00591	3.32907	-2.21428	1.02308	IFI44	interferon induced protein 44
206289_at	0.0735	0.00591	-3.32871	-2.21493	-0.766729	HOXA4	homeobox A4
209777_s_at	0.0737	0.00592	3.32757	-2.21694	0.635529	SLC19A1	solute carrier family 19 member 1
205933_at	0.0737	0.00593	-3.32709	-2.21778	-1.59097	SETBP1	SET binding protein 1
217579_x_at	0.0737	0.00593	-3.32693	-2.21806	-0.443344
208639_x_at	0.0738	0.00594	3.32553	-2.22052	0.805235	PDIA6	protein disulfide isomerase family A member 6
219221_at	0.0739	0.00596	-3.3238	-2.22357	-1.47177	ZBTB38	zinc finger and BTB domain containing 38
217897_at	0.0739	0.00596	-3.32374	-2.22368	-2.46505	FXYD6	FXYD domain containing ion transport regulator 6
204020_at	0.0739	0.00597	-3.32361	-2.22391	-0.759815	PURA	purine rich element binding protein A
203367_at	0.0739	0.00597	3.32306	-2.22488	1.06254	DUSP14	dual specificity phosphatase 14
205158_at	0.0739	0.00598	-3.32276	-2.22541	-1.76866	RNASE4	ribonuclease A family member 4
41047_at	0.0739	0.00598	3.32228	-2.22626	0.839713	C9orf16	chromosome 9 open reading frame 16
217437_s_at	0.0739	0.00598	-3.32227	-2.22627	-1.7627	TACC1	transforming acidic coiled-coil containing protein 1
203498_at	0.0739	0.00598	-3.32215	-2.22648	-1.47184	RCAN2	regulator of calcineurin 2
208943_s_at	0.0739	0.00598	-3.3221	-2.22657	-0.620934	SEC62	SEC62 homolog, preprotein translocation factor
209654_at	0.0739	0.00599	-3.32172	-2.22723	-0.709313	ICE1	interactor of little elongation complex ELL subunit 1
204603_at	0.0739	0.00599	3.32162	-2.22742	0.95274	EXO1	exonuclease 1
218339_at	0.0742	0.00602	3.3188	-2.23239	0.464621	MRPL22	mitochondrial ribosomal protein L22
206659_at	0.0742	0.00602	-3.3184	-2.2331	-0.853607
217594_at	0.0742	0.00603	-3.3183	-2.23327	-0.748936	ZCCHC11	zinc finger CCHC-type containing 11
213057_at	0.0742	0.00603	3.31767	-2.23437	0.669763	ATPAF2	ATP synthase mitochondrial F1 complex assembly factor 2
205526_s_at	0.0742	0.00604	-3.31695	-2.23566	-0.537171	KATNA1	katanin catalytic subunit A1
213974_at	0.0742	0.00605	-3.31651	-2.23643	-2.27561	ADAMTSL3	ADAMTS like 3
201913_s_at	0.0742	0.00605	3.31649	-2.23646	0.446642	COASY	Coenzyme A synthase
221802_s_at	0.0742	0.00605	3.31637	-2.23668	0.952779	SHTN1	shootin 1
207508_at	0.0742	0.00605	3.31631	-2.23677	0.671583	ATP5G3	ATP synthase, H+ transporting, mitochondrial Fo complex subunit C3 (subunit 9)
209262_s_at	0.0742	0.00605	3.31626	-2.23686	0.605346	NR2F6	nuclear receptor subfamily 2 group F member 6
209171_at	0.0746	0.00608	3.31321	-2.24225	0.55736	ITPA	inosine triphosphatase
218221_at	0.0747	0.00609	-3.31235	-2.24377	-0.748434	ARNT	aryl hydrocarbon receptor nuclear translocator
204284_at	0.0747	0.00609	-3.3122	-2.24403	-1.72761	PPP1R3C	protein phosphatase 1 regulatory subunit 3C
214964_at	0.0747	0.00611	-3.31117	-2.24583	-0.702685
216247_at	0.0747	0.00611	-3.31073	-2.24662	-1.13949	SNORD54///RPS20	small nucleolar RNA, C/D box 54///ribosomal protein S20
204811_s_at	0.0747	0.00611	-3.31062	-2.24681	-0.927776	CACNA2D2	calcium voltage-gated channel auxiliary subunit alpha2delta 2
201697_s_at	0.0747	0.00611	3.31055	-2.24693	0.765073	DNMT1	DNA (cytosine-5-)-methyltransferase 1
201619_at	0.0749	0.00613	3.30936	-2.24903	0.514439	PRDX3	peroxiredoxin 3
216913_s_at	0.075	0.00614	3.30779	-2.2518	0.582735	RRP12	ribosomal RNA processing 12 homolog
213908_at	0.075	0.00615	-3.30764	-2.25206	-1.12918	WHAMMP2///WHAMMP3	WAS protein homolog associated with actin, golgi membranes and microtubules pseudogene 2///WAS protein homolog associated with actin, golgi membranes and microtubules pseudogene 3
219768_at	0.0751	0.00616	3.3064	-2.25424	2.32762	VTCN1	V-set domain containing T cell activation inhibitor 1
221797_at	0.0751	0.00616	3.30616	-2.25467	0.399365	OXLD1	oxidoreductase like domain containing 1
218200_s_at	0.0752	0.00617	3.30522	-2.25633	0.555005	NDUFB2	NADH:ubiquinone oxidoreductase subunit B2
213944_x_at	0.0755	0.0062	-3.30268	-2.26082	-0.337067	GNA11	G protein subunit alpha 11
210334_x_at	0.0755	0.00622	3.30161	-2.26269	1.02037	BIRC5	baculoviral IAP repeat containing 5
202736_s_at	0.0755	0.00622	3.3016	-2.2627	1.0114	LSM4	LSM4 homolog, U6 small nuclear RNA and mRNA degradation associated
218961_s_at	0.0755	0.00622	3.30156	-2.26278	0.630867	PNKP	polynucleotide kinase 3'-phosphatase
201698_s_at	0.0755	0.00622	3.30137	-2.26311	0.60006	GATC///SRSF9	glutamyl-tRNA amidotransferase subunit C///serine and arginine rich splicing factor 9
219578_s_at	0.0755	0.00622	-3.30119	-2.26344	-1.37938	CPEB1	cytoplasmic polyadenylation element binding protein 1
205708_s_at	0.0755	0.00622	3.30107	-2.26365	0.688093	TRPM2	transient receptor potential cation channel subfamily M member 2
206405_x_at	0.0755	0.00622	-3.30104	-2.2637	-0.866564	USP32///USP6	ubiquitin specific peptidase 32///ubiquitin specific peptidase 6
201954_at	0.0756	0.00623	3.30012	-2.26532	1.0302	ARPC1B	actin related protein 2/3 complex subunit 1B
220060_s_at	0.0756	0.00623	3.30006	-2.26542	0.735395	PARPBP	PARP1 binding protein
201174_s_at	0.0756	0.00624	-3.29925	-2.26685	-0.84729	TERF2IP	TERF2 interacting protein
201068_s_at	0.0756	0.00624	3.29916	-2.26701	0.346865	PSMC2	proteasome 26S subunit, ATPase 2
58696_at	0.0756	0.00625	3.29907	-2.26717	0.712708	EXOSC4	exosome component 4
219461_at	0.0756	0.00625	3.2985	-2.26817	0.973408	PAK6	p21 (RAC1) activated kinase 6
218612_s_at	0.0757	0.00626	-3.29772	-2.26954	-0.461281	TSSC4	tumor suppressing subtransferable candidate 4
218358_at	0.0757	0.00627	3.29696	-2.27088	0.729406	CRELD2	cysteine rich with EGF like domains 2
220335_x_at	0.0758	0.00628	3.29651	-2.27168	0.953204	CES3	carboxylesterase 3
220452_x_at	0.0759	0.00629	-3.29523	-2.27395	-0.847109
208969_at	0.0759	0.0063	3.29466	-2.27495	0.542907	NDUFA9	NADH:ubiquinone oxidoreductase subunit A9
218077_s_at	0.0759	0.0063	3.29444	-2.27534	0.400546	ZDHHC3	zinc finger DHHC-type containing 3
214880_x_at	0.0759	0.0063	-3.2944	-2.27541	-0.550453	CALD1	caldesmon 1
220374_at	0.0759	0.0063	-3.29432	-2.27554	-0.574006	KLHL28	kelch like family member 28
210170_at	0.0759	0.00631	-3.29331	-2.27732	-1.88899	PDLIM3	PDZ and LIM domain 3
216894_x_at	0.0759	0.00631	-3.29328	-2.27738	-1.55925	CDKN1C	cyclin dependent kinase inhibitor 1C
204051_s_at	0.076	0.00632	-3.29279	-2.27825	-2.73825	SFRP4	secreted frizzled related protein 4
215198_s_at	0.0761	0.00634	-3.29123	-2.28099	-1.23662	CALD1	caldesmon 1
215865_at	0.0761	0.00634	-3.29116	-2.28111	-0.374404	SYT12	synaptotagmin 12
215164_at	0.0761	0.00634	-3.29108	-2.28126	-1.20756
218498_s_at	0.0761	0.00634	3.29074	-2.28186	1.57457	ERO1A	endoplasmic reticulum oxidoreductase 1 alpha
220524_at	0.0761	0.00634	3.29062	-2.28207	0.416741	EPB41L4B	erythrocyte membrane protein band 4.1 like 4B
221586_s_at	0.0763	0.00637	3.28845	-2.28589	1.05704	E2F5	E2F transcription factor 5
202819_s_at	0.0764	0.00638	3.28751	-2.28755	0.553179	TCEB3	transcription elongation factor B subunit 3
201662_s_at	0.0764	0.00639	3.28691	-2.2886	1.05792	ACSL3	acyl-CoA synthetase long-chain family member 3
214902_x_at	0.0764	0.00639	-3.28664	-2.28909	-1.042	LPP	LIM domain containing preferred translocation partner in lipoma
220172_at	0.0764	0.00639	3.28649	-2.28935	0.54805	DCAF17	DDB1 and CUL4 associated factor 17
219920_s_at	0.0764	0.0064	3.28614	-2.28996	0.913832	AMIGO3///GMPPB	adhesion molecule with Ig like domain 3///GDP-mannose pyrophosphorylase B
214745_at	0.0764	0.0064	3.28599	-2.29024	1.07969	PLCH1	phospholipase C eta 1
214155_s_at	0.0764	0.0064	3.28571	-2.29072	0.80197	LARP4	La ribonucleoprotein domain family member 4
210821_x_at	0.0764	0.0064	3.28568	-2.29077	0.869292	CENPA	centromere protein A
212812_at	0.0765	0.00641	3.28503	-2.29193	1.43684	SERINC5	serine incorporator 5
202388_at	0.0765	0.00642	-3.28463	-2.29262	-1.66012	RGS2	regulator of G-protein signaling 2
219838_at	0.0767	0.00643	-3.28302	-2.29547	-0.539542	TTC23	tetratricopeptide repeat domain 23
211047_x_at	0.0768	0.00645	3.28177	-2.29768	0.600671	AP2S1	adaptor related protein complex 2 sigma 1 subunit
204100_at	0.0768	0.00645	-3.28173	-2.29775	-1.29663	THRA	thyroid hormone receptor, alpha
221907_at	0.0768	0.00646	-3.28127	-2.29855	-0.510385	TRMT61A	tRNA methyltransferase 61A
214053_at	0.0768	0.00646	3.28115	-2.29876	1.54158	ERBB4	erb-b2 receptor tyrosine kinase 4
209891_at	0.0768	0.00646	3.28089	-2.29922	0.930838	SPC25	SPC25, NDC80 kinetochore complex component
212966_at	0.0768	0.00646	-3.28055	-2.29981	-0.77472	HIC2	hypermethylated in cancer 2
203117_s_at	0.0769	0.00648	-3.2795	-2.30167	-0.640306	PAN2	PAN2 poly(A) specific ribonuclease subunit
209236_at	0.077	0.00649	-3.27861	-2.30324	-0.878479	SLC23A2	solute carrier family 23 member 2
209615_s_at	0.077	0.00649	3.27822	-2.30392	0.685937	PAK1	p21 (RAC1) activated kinase 1
219065_s_at	0.077	0.0065	3.27792	-2.30446	0.756833	DPY30///MEMO1	dpy-30, histone methyltransferase complex regulatory subunit///mediator of cell motility 1
217733_s_at	0.077	0.0065	3.27778	-2.3047	0.905606	TMSB10	thymosin beta 10
218151_x_at	0.077	0.0065	3.27724	-2.30566	0.703271	SLC52A2	solute carrier family 52 member 2
222248_s_at	0.077	0.00651	-3.2767	-2.30661	-0.424774	SIRT4	sirtuin 4
218242_s_at	0.077	0.00652	-3.27608	-2.3077	-0.673949	KMT5B	lysine methyltransferase 5B
206015_s_at	0.077	0.00652	-3.27597	-2.30789	-0.618892	FOXJ3	forkhead box J3
207953_at	0.077	0.00652	-3.27596	-2.30791	-0.905713
204310_s_at	0.077	0.00652	-3.2758	-2.3082	-1.40957	NPR2	natriuretic peptide receptor 2
206499_s_at	0.077	0.00653	3.27541	-2.30889	1.42396	RCC1	regulator of chromosome condensation 1
202743_at	0.077	0.00653	3.27503	-2.30955	1.07316	PIK3R3	phosphoinositide-3-kinase regulatory subunit 3
210594_x_at	0.077	0.00653	3.27499	-2.30962	0.577882	MPZL1	myelin protein zero like 1
215137_at	0.077	0.00654	-3.27439	-2.31068	-0.639915
205239_at	0.077	0.00654	3.27433	-2.31079	1.68462	AREG	amphiregulin
214870_x_at	0.077	0.00655	-3.27375	-2.31181	-0.623441	LOC102724993///LOC101930075///NPIPA8///NPIPA7///NPIPA5///NPIPA2///NPIPA3///PKD1P1///NPIPA1	nuclear pore complex-interacting protein family member A7-like///polycystin-1-like///nuclear pore complex interacting protein family member A8///nuclear pore complex interacting protein family member A7///nuclear pore complex interacting protein family member A5///nuclear pore complex interacting protein family member A2///nuclear pore complex interacting protein family member A3///polycystin 1, …
203756_at	0.0772	0.00657	-3.27218	-2.31457	-0.980063	ARHGEF17	Rho guanine nucleotide exchange factor 17
213129_s_at	0.0772	0.00657	3.2719	-2.31507	0.779479	LOC101060817///GCSH	glycine cleavage system H protein, mitochondrial-like///glycine cleavage system protein H
212162_at	0.0773	0.00658	-3.27107	-2.31653	-0.795897	KIDINS220	kinase D-interacting substrate 220kDa
202900_s_at	0.0773	0.00658	3.27094	-2.31677	0.733114	NUP88	nucleoporin 88
217640_x_at	0.0774	0.0066	3.26959	-2.31915	0.582286	SKA1	spindle and kinetochore associated complex subunit 1
216749_at	0.0775	0.00661	-3.26894	-2.32029	-0.680394
212244_at	0.0777	0.00663	-3.26701	-2.3237	-1.00988	GCOM1///POLR2M	GRINL1A complex locus 1///RNA polymerase II subunit M
215636_at	0.0781	0.00666	-3.2645	-2.32812	-0.519345	UBR4	ubiquitin protein ligase E3 component n-recognin 4
209461_x_at	0.0782	0.00668	3.26323	-2.33035	0.548131	WDR18	WD repeat domain 18
216992_s_at	0.0782	0.00668	3.26307	-2.33064	0.489746	GRM8	glutamate metabotropic receptor 8
202202_s_at	0.0782	0.00669	-3.26229	-2.33202	-1.82389	LAMA4	laminin subunit alpha 4
209212_s_at	0.0782	0.00669	3.26226	-2.33207	1.92038	KLF5	Kruppel like factor 5
204016_at	0.0783	0.0067	3.26155	-2.33332	0.472329	LARS2	leucyl-tRNA synthetase 2, mitochondrial
207668_x_at	0.0784	0.00672	3.26017	-2.33576	0.805185	PDIA6	protein disulfide isomerase family A member 6
214494_s_at	0.0784	0.00672	-3.26014	-2.33581	-0.528774	LOC101930112///SPG7	uncharacterized LOC101930112///SPG7, paraplegin matrix AAA peptidase subunit
203602_s_at	0.0785	0.00672	-3.2595	-2.33694	-0.421132	ZBTB17	zinc finger and BTB domain containing 17
221704_s_at	0.0787	0.00674	3.25791	-2.33973	0.845437	VPS37B	VPS37B, ESCRT-I subunit
200654_at	0.0787	0.00675	3.25737	-2.34069	0.912215	P4HB	prolyl 4-hydroxylase subunit beta
218327_s_at	0.079	0.00678	3.25499	-2.34488	0.610926	SNAP29	synaptosome associated protein 29
217734_s_at	0.079	0.00678	-3.25473	-2.34534	-0.798345	WDR6	WD repeat domain 6
212019_at	0.079	0.00679	-3.25452	-2.3457	-0.865357	RSL1D1	ribosomal L1 domain containing 1
219033_at	0.0791	0.0068	3.25362	-2.34729	1.08219	PARP8	poly(ADP-ribose) polymerase family member 8
218115_at	0.0791	0.0068	3.25352	-2.34747	1.10755	ASF1B	anti-silencing function 1B histone chaperone
218359_at	0.0792	0.00681	-3.25241	-2.34943	-0.441905	NRSN2	neurensin 2
202871_at	0.0793	0.00683	3.25132	-2.35136	1.28973	TRAF4	TNF receptor associated factor 4
219247_s_at	0.0793	0.00683	-3.25121	-2.35155	-1.49864	ZDHHC14	zinc finger DHHC-type containing 14
203664_s_at	0.0793	0.00683	3.251	-2.35191	0.49338	POLR2D	RNA polymerase II subunit D
205792_at	0.0793	0.00683	-3.25071	-2.35243	-1.44343	WISP2	WNT1 inducible signaling pathway protein 2
209470_s_at	0.0793	0.00684	-3.24999	-2.35369	-1.57966	GPM6A	glycoprotein M6A
206625_at	0.0794	0.00685	-3.24947	-2.35461	-0.749684	PRPH2	peripherin 2
202981_x_at	0.0794	0.00686	-3.2489	-2.35562	-0.531491	SIAH1	siah E3 ubiquitin protein ligase 1
210858_x_at	0.0794	0.00686	-3.24868	-2.356	-1.06378	ATM	ATM serine/threonine kinase
205221_at	0.0795	0.00687	3.24784	-2.35749	2.47106	HGD	homogentisate 1,2-dioxygenase
204121_at	0.0795	0.00688	-3.2472	-2.35862	-1.48813	GADD45G	growth arrest and DNA damage inducible gamma
213496_at	0.0796	0.00689	3.24651	-2.35984	0.858693	PLPPR4	phospholipid phosphatase related 4
220331_at	0.0797	0.0069	-3.24542	-2.36174	-0.906311	CYP46A1	cytochrome P450 family 46 subfamily A member 1
202319_at	0.0797	0.00691	-3.24495	-2.36258	-0.794656	SENP6	SUMO1/sentrin specific peptidase 6
206721_at	0.0798	0.00692	-3.24427	-2.36378	-1.06524	CCDC181	coiled-coil domain containing 181
213480_at	0.0799	0.00693	-3.24357	-2.36502	-0.711642	VAMP4	vesicle associated membrane protein 4
208691_at	0.0799	0.00693	3.24328	-2.36552	1.55308	TFRC	transferrin receptor
210105_s_at	0.0799	0.00694	-3.24287	-2.36624	-0.996049	FYN	FYN proto-oncogene, Src family tyrosine kinase
205980_s_at	0.08	0.00695	3.24205	-2.36769	1.82529	PRR5-ARHGAP8///ARHGAP8	PRR5-ARHGAP8 readthrough///Rho GTPase activating protein 8
220102_at	0.08	0.00695	-3.24183	-2.36808	-2.3144	FOXL2	forkhead box L2
215640_at	0.08	0.00696	-3.24124	-2.36911	-0.530327	TBC1D2B	TBC1 domain family member 2B
209982_s_at	0.0801	0.00697	-3.24051	-2.37041	-1.68263	NRXN2	neurexin 2
203430_at	0.0801	0.00697	3.24034	-2.3707	0.893678	HEBP2	heme binding protein 2
201989_s_at	0.0801	0.00698	-3.23946	-2.37226	-0.580611	CREBL2	cAMP responsive element binding protein like 2
220817_at	0.0802	0.00699	-3.23858	-2.37381	-1.74767	TRPC4	transient receptor potential cation channel subfamily C member 4
208625_s_at	0.0805	0.00702	3.23654	-2.3774	0.398474	EIF4G1	eukaryotic translation initiation factor 4 gamma 1
203687_at	0.0807	0.00705	3.23431	-2.38133	0.600853	CX3CL1	C-X3-C motif chemokine ligand 1
205139_s_at	0.0807	0.00705	-3.23422	-2.3815	-1.57562	UST	uronyl 2-sulfotransferase
213709_at	0.0807	0.00705	-3.23412	-2.38166	-0.934978	BHLHB9	basic helix-loop-helix domain containing, class B, 9
204839_at	0.0807	0.00705	3.23402	-2.38184	0.634655	POP5	POP5 homolog, ribonuclease P/MRP subunit
216509_x_at	0.0808	0.00707	-3.23293	-2.38377	-0.404793	MLLT10	myeloid/lymphoid or mixed-lineage leukemia; translocated to, 10
204688_at	0.081	0.00708	-3.23167	-2.38598	-2.06726	SGCE	sarcoglycan epsilon
216144_at	0.081	0.00708	-3.23152	-2.38626	-0.395923
208650_s_at	0.0811	0.0071	3.23041	-2.38821	2.45224	CD24	CD24 molecule
37005_at	0.0811	0.00711	-3.22988	-2.38915	-1.21528	MINOS1-NBL1///NBL1	MINOS1-NBL1 readthrough///neuroblastoma 1, DAN family BMP antagonist
202177_at	0.0814	0.00714	-3.22758	-2.3932	-1.86777	GAS6	growth arrest specific 6
200913_at	0.0814	0.00714	3.22755	-2.39325	0.469376	PPM1G	protein phosphatase, Mg2+/Mn2+ dependent 1G
218714_at	0.0814	0.00715	-3.2268	-2.39458	-0.44691	PRR14	proline rich 14
206200_s_at	0.0814	0.00715	3.22676	-2.39464	0.777109	ANXA11	annexin A11
203141_s_at	0.0814	0.00715	3.2267	-2.39475	0.365217	AP3B1	adaptor related protein complex 3 beta 1 subunit
202675_at	0.0814	0.00715	3.22654	-2.39504	0.510348	SDHB	succinate dehydrogenase complex iron sulfur subunit B
220252_x_at	0.0814	0.00716	-3.2259	-2.39617	-0.415594	CXorf21	chromosome X open reading frame 21
53987_at	0.0814	0.00718	-3.22454	-2.39855	-0.59224	RANBP10	RAN binding protein 10
206689_x_at	0.0814	0.00718	-3.22432	-2.39894	-0.557413	KAT5	lysine acetyltransferase 5
202085_at	0.0814	0.00718	3.22429	-2.399	0.864283	TJP2	tight junction protein 2
210435_at	0.0814	0.00718	-3.22417	-2.39921	-0.506001	ARL17B///ARL17A	ADP ribosylation factor like GTPase 17B///ADP ribosylation factor like GTPase 17A
211080_s_at	0.0814	0.00718	3.22417	-2.39922	0.628214	NEK2	NIMA related kinase 2
206638_at	0.0814	0.00718	-3.224	-2.39951	-2.37528	HTR2B	5-hydroxytryptamine receptor 2B
201395_at	0.0814	0.00719	-3.22391	-2.39967	-0.595046	RBM5	RNA binding motif protein 5
203944_x_at	0.0814	0.00719	-3.22377	-2.39992	-0.285566	BTN2A1	butyrophilin subfamily 2 member A1
207168_s_at	0.0815	0.00719	3.2234	-2.40057	0.48843	H2AFY	H2A histone family member Y
204064_at	0.0815	0.0072	-3.22292	-2.40142	-0.472334	THOC1	THO complex 1
203575_at	0.0815	0.0072	-3.22266	-2.40188	-0.892942	CSNK2A2	casein kinase 2 alpha 2
202380_s_at	0.0816	0.00721	-3.22194	-2.40314	-0.617616	NKTR	natural killer cell triggering receptor
221587_s_at	0.0816	0.00722	3.22136	-2.40417	0.348819	C19orf24	chromosome 19 open reading frame 24
212665_at	0.0816	0.00722	-3.22103	-2.40475	-0.975811	TIPARP	TCDD inducible poly(ADP-ribose) polymerase
203688_at	0.0816	0.00723	-3.22057	-2.40556	-1.0677	PKD2	polycystin 2, transient receptor potential cation channel
217866_at	0.0816	0.00723	-3.22026	-2.4061	-0.724847	CPSF7	cleavage and polyadenylation specific factor 7
212980_at	0.0816	0.00724	-3.22	-2.40656	-0.997291	AHSA2	AHA1, activator of heat shock 90kDa protein ATPase homolog 2 (yeast)
211978_x_at	0.0816	0.00724	3.21965	-2.40717	0.393664	LOC101060363///PPIA	peptidyl-prolyl cis-trans isomerase A pseudogene///peptidylprolyl isomerase A
208158_s_at	0.0816	0.00724	-3.21964	-2.4072	-1.37407	OSBPL1A	oxysterol binding protein like 1A
203029_s_at	0.0816	0.00725	-3.2192	-2.40797	-1.44677	PTPRN2	protein tyrosine phosphatase, receptor type N2
202290_at	0.0816	0.00725	3.21907	-2.40819	0.90688	PDAP1	PDGFA associated protein 1
209375_at	0.0817	0.00726	-3.21819	-2.40974	-0.520453	XPC	XPC complex subunit, DNA damage recognition and repair factor
219836_at	0.0817	0.00727	3.21752	-2.41093	1.80051	ZBED2	zinc finger BED-type containing 2
212630_at	0.0817	0.00727	-3.21744	-2.41107	-0.540979	EXOC3	exocyst complex component 3
214686_at	0.0818	0.00729	-3.21644	-2.41284	-0.648721	ZNF266	zinc finger protein 266
204754_at	0.0818	0.00729	-3.2164	-2.4129	-2.02933	HLF	HLF, PAR bZIP transcription factor
206167_s_at	0.0818	0.0073	-3.21576	-2.41404	-2.26887	ARHGAP6	Rho GTPase activating protein 6
213249_at	0.0818	0.0073	-3.21553	-2.41444	-1.5223	FBXL7	F-box and leucine rich repeat protein 7
209106_at	0.0818	0.0073	-3.21553	-2.41445	-0.86472	NCOA1	nuclear receptor coactivator 1
214002_at	0.0818	0.0073	-3.21542	-2.41464	-0.719698	MYL6	myosin light chain 6
202273_at	0.0818	0.0073	-3.21521	-2.415	-1.1256	PDGFRB	platelet derived growth factor receptor beta
204589_at	0.0818	0.0073	-3.21514	-2.41512	-1.2408	NUAK1	NUAK family kinase 1
208912_s_at	0.0818	0.00731	3.21472	-2.41587	0.43228	CNP	2',3'-cyclic nucleotide 3' phosphodiesterase
213727_x_at	0.0818	0.00731	3.21448	-2.41628	0.408485	MPPE1	metallophosphoesterase 1
201427_s_at	0.0823	0.00737	-3.21061	-2.4231	-1.61391	SEPP1	selenoprotein P, plasma, 1
205782_at	0.0823	0.00737	-3.21054	-2.42323	-1.78383	FGF7	fibroblast growth factor 7
203516_at	0.0823	0.00737	-3.21019	-2.42384	-0.544549	SNTA1	syntrophin alpha 1
208941_s_at	0.0824	0.00739	3.20922	-2.42557	0.492932	SEPHS1	selenophosphate synthetase 1
202149_at	0.0824	0.00739	3.20915	-2.42569	1.2577	NEDD9	neural precursor cell expressed, developmentally down-regulated 9
219090_at	0.0824	0.00739	-3.20889	-2.42614	-2.56571	SLC24A3	solute carrier family 24 member 3
212783_at	0.0824	0.0074	-3.2085	-2.42683	-0.710118	RBBP6	RB binding protein 6, ubiquitin ligase
[truncated: 2,505 more rows]
