# Supplementary material for: Identification and prognostic value of DLGAP5 in endometrial cancer
Source: PeerJ. 2020 Nov 27;8:e10433. doi: 10.7717/peerj.10433 (PMC7703392; doi:10.7717/peerj.10433)
Supplement: Supplemental Information 4 [file peerj-08-10433-s004.xlsx]

## Sheet: Sheet1
Tags	TCGA-D1-A160-01	TCGA-KP-A3W4-01	TCGA-A5-A0VP-01	TCGA-EO-A1Y7-01	TCGA-BG-A0W2-01	TCGA-BS-A0UM-01	TCGA-FI-A2CY-01	TCGA-A5-A0GX-01	TCGA-AX-A0J1-01	TCGA-B5-A0JU-01	TCGA-AJ-A3NC-11	TCGA-B5-A11U-01	TCGA-QS-A5YR-01	TCGA-D1-A102-01	TCGA-BG-A0LW-01	TCGA-D1-A0ZZ-01	TCGA-BK-A4ZD-01	TCGA-BG-A0M0-01	TCGA-BG-A0MC-01	TCGA-AX-A2IN-01	TCGA-EO-A3KU-01	TCGA-AX-A1CR-01	TCGA-EY-A1G8-01	TCGA-D1-A0ZP-01	TCGA-DF-A2L0-01	TCGA-D1-A16V-01	TCGA-BK-A13C-01	TCGA-4E-A92E-01	TCGA-AX-A060-01	TCGA-DI-A1NN-01	TCGA-AP-A0LF-01	TCGA-5S-A9Q8-01	TCGA-BG-A0MO-01	TCGA-D1-A17Q-01	TCGA-AX-A06L-01	TCGA-BG-A0VW-01	TCGA-AX-A3GI-01	TCGA-BK-A139-01	TCGA-AP-A0LI-01	TCGA-BG-A3PP-01	TCGA-AJ-A3EJ-01	TCGA-BK-A0CC-01	TCGA-BG-A0MG-01	TCGA-B5-A11Z-01	TCGA-EY-A2OP-01	TCGA-EY-A3QX-01	TCGA-B5-A11Q-01	TCGA-PG-A914-01	TCGA-A5-A0GQ-01
ENSG00000126787.11	4.85754	15.8614	4.86333	9.20266	2.74614	5.00741	10.9716	0.374372	7.98615	7.02153	0.143547	7.65158	5.58482	4.18981	0.766871	5.533	13.0311	3.76949	1.05846	15.5685	9.85978	2.6352	10.6684	15.6078	3.96435	5.95354	3.2891	4.35123	2.22738	10.1355	4.43938	1.92719	1.12332	2.57259	2.67362	3.01336	12.7321	9.69032	3.23314	19.3441	4.34512	7.50301	7.74592	1.19395	11.1947	15.2718	1.85921	5.57242	3.2298
[truncated: 537 more columns]
