# Supplementary material for: Identification and prognostic value of DLGAP5 in endometrial cancer
Source: PeerJ. 2020 Nov 27;8:e10433. doi: 10.7717/peerj.10433 (PMC7703392; doi:10.7717/peerj.10433)
Supplement: Supplemental Information 5 [file peerj-08-10433-s005.xlsx]

## Sheet: Sheet1
sample No.	tumor	adjacent
1	2.87521	1
2	33.3069	0.034126
3	10.7005	0.376563
4	3.6986	0.836487
5	4.66227	3.60314
6	6.8537	0.573956
7	0.207866	0.0826454
8	1.58828	1.29575
9	23.5131	2.48674
10	9.74663	0.075936
11	14.8574	0.783728
12	12.5857	2.21944
13	18.7466	1.76993
14	3.68672	0.409836
15	0.782932	0.852321
16	9.84646	1.47584
