# Supplementary material for: Identification and prognostic value of DLGAP5 in endometrial cancer
Source: PeerJ. 2020 Nov 27;8:e10433. doi: 10.7717/peerj.10433 (PMC7703392; doi:10.7717/peerj.10433)
Supplement: Supplemental Information 9 [file peerj-08-10433-s009.xlsx]

## Sheet: Sheet1
patient bar	Stage	FPKM	age at initial pathologic diagnosis	sex	race	event	state(dead=0, alive=1)	OS(days)
TCGA-PG-A916	Stage I	3.9	70	female	black or african american	alive	1	522
TCGA-4E-A92E	Stage I	4.4	54	female	black or african american	alive	1	13
TCGA-BG-A18B	Stage I	5.6	53	female	white	alive	1	470
TCGA-BS-A0UJ	Stage IA	0.3	68	female	asian	alive	1	2506
TCGA-A5-A1OJ	Stage IA	0.4	31	female	asian	alive	1	1006
TCGA-AP-A0LL	Stage IA	0.4	56	female	white	alive	1	2554
TCGA-D1-A17N	Stage IA	0.4	46	female		alive	1	46
TCGA-A5-A0GX	Stage IA	0.4	53	female	white	alive	1	2088
TCGA-D1-A17C	Stage IA	0.5	78	female	white	alive	1	30
TCGA-AJ-A3OK	Stage IA	0.7	73	female	white	alive	1	485
TCGA-D1-A17L	Stage IA	0.7	81	female	white	alive	1	802
TCGA-EY-A1GE	Stage IA	0.8	67	female	white	alive	1	741
TCGA-BG-A0LW	Stage IA	0.8	47	female	white	alive	1	566
TCGA-BS-A0WQ	Stage IA	0.9	55	female	asian	alive	1	2022
TCGA-BG-A18A	Stage IA	1	74	female	white	alive	1	426
TCGA-D1-A17S	Stage IA	1	59	female	white	alive	1	739
TCGA-BG-A0MO	Stage IA	1.1	63	female	white	alive	1	1309
TCGA-AP-A0LN	Stage IA	1.1	56	female	black or african american	alive	1	2510
TCGA-BG-A0MC	Stage IA	1.1	74	female	white	alive	1	1263
TCGA-A5-A0GR	Stage IA	1.2	69	female	black or african american	alive	1	1120
TCGA-D1-A174	Stage IA	1.2	51	female	white	alive	1	594
TCGA-B5-A11Z	Stage IA	1.2	61	female	white	alive	1	528
TCGA-B5-A0K6	Stage IA	1.3	58	female	white	alive	1	1953
TCGA-AJ-A8CT	Stage IA	1.3	58	female	black or african american	alive	1	82
TCGA-A5-A0GJ	Stage IA	1.4	44	female	white	alive	1	2000
TCGA-AP-A0LJ	Stage IA	1.4	42	female	white	alive	1	1421
TCGA-A5-A0VQ	Stage IA	1.4	63	female		alive	1	485
TCGA-B5-A11N	Stage IA	1.4	69	female	white	alive	1	1876
TCGA-BG-A0M4	Stage IA	1.4	60	female	white	alive	1	2167
TCGA-AP-A1DP	Stage IA	1.6	70	female	white	dead	0	1081
TCGA-BG-A0M8	Stage IA	1.7	50	female	white	alive	1	2020
TCGA-B5-A1MZ	Stage IA	1.7	54	female	white	alive	1	1598
TCGA-D1-A17R	Stage IA	1.7	58	female	white	dead	0	339
TCGA-B5-A0K0	Stage IA	1.9	48	female	white	alive	1	1478
TCGA-A5-A0R9	Stage IA	1.9	52	female	white	alive	1	749
TCGA-AP-A05P	Stage IA	1.9	54	female	asian	alive	1	636
TCGA-D1-A1O5	Stage IA	1.9	61	female	white	alive	1	458
TCGA-B5-A0JS	Stage IA	2.1	54	female	white	alive	1	2627
TCGA-B5-A0K7	Stage IA	2.2	64	female	white	alive	1	1933
TCGA-BG-A0YU	Stage IA	2.3	37	female	white	alive	1	451
TCGA-B5-A11M	Stage IA	2.4	44	female	white	alive	1	1362
TCGA-D1-A17F	Stage IA	2.4	68	female	white	alive	1	39
TCGA-D1-A17T	Stage IA	2.5	67	female	white	alive	1	71
TCGA-B5-A11V	Stage IA	2.5	64	female	black or african american	alive	1	595
TCGA-D1-A17Q	Stage IA	2.6	54	female	white	alive	1	54
TCGA-D1-A3JP	Stage IA	2.6	61	female	white	alive	1	515
TCGA-BG-A0W2	Stage IA	2.7	57	female	white	alive	1	1721
TCGA-A5-A0GV	Stage IA	2.8	67	female	white	alive	1	1643
TCGA-D1-A16R	Stage IA	2.8	39	female	white	alive	1	21
TCGA-AJ-A3NC	Stage IA	2.8	63	female	white	alive	1	1125
TCGA-AP-A0LP	Stage IA	2.9	76	female	white	alive	1	1875
TCGA-PG-A917	Stage IA	2.9	74	female	black or african american	alive	1	212
TCGA-A5-A0GU	Stage IA	2.9	58	female	white	alive	1	860
TCGA-BG-A0VW	Stage IA	3	77	female	white	alive	1	1582
TCGA-AP-A0LE	Stage IA	3	57	female	white	alive	1	3357
TCGA-BS-A0UL	Stage IA	3.1	54	female	native hawaiian or other pacific islander	alive	1	2481
TCGA-EY-A548	Stage IA	3.1	83	female	black or african american	alive	1	430
TCGA-D1-A0ZN	Stage IA	3.2	60	female	white	alive	1	512
TCGA-EY-A549	Stage IA	3.3	78	female	black or african american	alive	1	605
TCGA-EO-A3AS	Stage IA	3.3	86	female		alive	1	1046
TCGA-A5-A0R7	Stage IA	3.4	55	female	white	alive	1	535
TCGA-B5-A11G	Stage IA	3.4	71	female	black or african american	alive	1	3448
TCGA-BG-A0MT	Stage IA	3.6	64	female	white	alive	1	644
TCGA-BG-A2L7	Stage IA	3.6	68	female	white	alive	1	612
TCGA-B5-A0K3	Stage IA	3.6	62	female	black or african american	dead	0	830
TCGA-BG-A0MQ	Stage IA	3.7	72	female	white	alive	1	1817
TCGA-BG-A0MI	Stage IA	3.7	83	female	white	dead	0	714
TCGA-BG-A0M0	Stage IA	3.8	66	female	white	alive	1	588
TCGA-AP-A1DM	Stage IA	3.9	60	female	white	alive	1	1700
TCGA-FI-A2F9	Stage IA	3.9	79	female	white	alive	1	1803
TCGA-D1-A1NS	Stage IA	3.9	53	female	white	alive	1	43
TCGA-BS-A0U5	Stage IA	4.2	76	female	white	alive	1	2935
TCGA-B5-A11F	Stage IA	4.3	55	female	white	alive	1	5651
TCGA-BG-A0VV	Stage IA	4.3	53	female	white	alive	1	1553
TCGA-A5-A0GI	Stage IA	4.6	63	female	white	alive	1	2682
TCGA-A5-A0GE	Stage IA	4.7	38	female	asian	alive	1	3205
TCGA-B5-A3FH	Stage IA	4.7	74	female	black or african american	alive	1	841
TCGA-EY-A1GP	Stage IA	4.8	54	female	black or african american	alive	1	573
TCGA-AP-A1E1	Stage IA	4.8	74	female	white	alive	1	1395
TCGA-AX-A3G8	Stage IA	4.8	76	female	white	alive	1	30
TCGA-A5-A0G1	Stage IA	4.8	67	female	white	dead	0	3251
TCGA-A5-A0VP	Stage IA	4.9	74	female	white	alive	1	1288
TCGA-A5-A7WK	Stage IA	5	71	female	black or african american	alive	1	560
TCGA-D1-A1NZ	Stage IA	5	60	female	white	alive	1	548
TCGA-AJ-A3BI	Stage IA	5	67	female	white	alive	1	575
TCGA-B5-A11J	Stage IA	5.1	64	female	white	alive	1	1656
TCGA-BK-A6W4	Stage IA	5.1	62	female	black or african american	alive	1	300
TCGA-AP-A0LO	Stage IA	5.2	45	female	white	dead	0	1016
TCGA-AJ-A3BG	Stage IA	5.4	65	female	white	alive	1	550
TCGA-AP-A05N	Stage IA	5.4	58	female	white	dead	0	726
TCGA-BG-A222	Stage IA	5.5	49	female	white	alive	1	291
TCGA-PG-A914	Stage IA	5.6	73	female	black or african american	alive	1	687
TCGA-A5-A2K3	Stage IA	5.6	68	female	white	alive	1	2012
TCGA-EY-A2OM	Stage IA	5.7	55	female	white	alive	1	694
TCGA-A5-A2K5	Stage IA	5.8	76	female	white	alive	1	752
TCGA-EY-A1GD	Stage IA	5.8	51	female	black or african american	alive	1	1639
TCGA-B5-A11S	Stage IA	5.9	63	female	white	alive	1	2229
TCGA-AP-A1DK	Stage IA	6	53	female	white	alive	1	2767
TCGA-EY-A2OQ	Stage IA	6.2	61	female	white	alive	1	885
TCGA-B5-A11O	Stage IA	6.3	62	female	white	alive	1	2609
TCGA-B5-A0JV	Stage IA	6.4	63	female	black or african american	alive	1	2616
TCGA-AP-A0L9	Stage IA	6.4	71	female	white	alive	1	3815
TCGA-BG-A18C	Stage IA	6.4	72	female	white	alive	1	470
TCGA-AX-A2HH	Stage IA	6.6	60	female	white	alive	1	540
TCGA-AP-A0LV	Stage IA	6.7	39	female	white	alive	1	763
TCGA-AP-A1DO	Stage IA	6.7	62	female	white	alive	1	952
TCGA-E6-A2P9	Stage IA	6.9	65	female	white	alive	1	1386
TCGA-D1-A15X	Stage IA	7	45	female	white	alive	1	909
TCGA-B5-A1MV	Stage IA	7	84	female	white	alive	1	1565
TCGA-EO-A2CG	Stage IA	7.1	69	female	asian	alive	1	1564
TCGA-A5-A0GW	Stage IA	7.2	46	female	asian	alive	1	706
TCGA-EC-A1NJ	Stage IA	7.2	73	female	white	alive	1	488
TCGA-A5-A0GM	Stage IA	7.2	53	female	white	alive	1	1841
TCGA-FI-A2D0	Stage IA	7.3	55	female	white	alive	1	1023
TCGA-AP-A1DH	Stage IA	7.3	62	female	white	alive	1	2180
TCGA-AJ-A2QK	Stage IA	7.6	65	female	white	alive	1	643
TCGA-BG-A0MG	Stage IA	7.7	73	female	white	alive	1	1477
TCGA-EY-A1GF	Stage IA	7.7	75	female	black or african american	alive	1	826
TCGA-AJ-A5DV	Stage IA	8	65	female	black or african american	alive	1	679
TCGA-KP-A3W1	Stage IA	8	76	female		alive	1	288
TCGA-B5-A0K1	Stage IA	8	69	female	white	alive	1	1110
TCGA-EO-A3KX	Stage IA	8.1	80	female	white	alive	1	1170
TCGA-D1-A1O7	Stage IA	8.2	60	female	white	alive	1	32
TCGA-A5-A0GD	Stage IA	8.2	75	female	white	dead	0	3423
TCGA-AP-A0LH	Stage IA	8.3	60	female	white	dead	0	1106
TCGA-EO-A1Y8	Stage IA	8.4	87	female		alive	1	1147
TCGA-AP-A0LG	Stage IA	8.7	54	female	white	alive	1	2015
TCGA-D1-A17K	Stage IA	8.9	74	female	white	alive	1	854
TCGA-E6-A1LZ	Stage IA	9.1	76	female	black or african american	alive	1	2406
TCGA-AJ-A8CW	Stage IA	9.2	64	female	black or african american	alive	1	4
TCGA-A5-A1OF	Stage IA	9.3	47	female		alive	1	973
TCGA-D1-A1NU	Stage IA	9.5	74	female	white	alive	1	402
TCGA-AX-A1CP	Stage IA	9.5	84	female	white	alive	1	1107
TCGA-A5-A0GG	Stage IA	9.7	76	female	black or african american	alive	1	3762
TCGA-EO-A3L0	Stage IA	10.2	76	female	white	alive	1	1554
TCGA-FI-A3PV	Stage IA	10.2	68	female	black or african american	dead	0	1249
TCGA-A5-A7WJ	Stage IA	10.5	64	female	black or african american	alive	1	341
TCGA-AJ-A3NE	Stage IA	10.5	46	female	white	alive	1	628
TCGA-A5-A2K2	Stage IA	10.5	77	female	white	alive	1	3595
TCGA-B5-A3FD	Stage IA	10.5	70	female	black or african american	dead	0	1197
TCGA-PG-A915	Stage IA	10.7	60	female	black or african american	alive	1	249
TCGA-FI-A2CY	Stage IA	11	60	female	black or african american	alive	1	2080
TCGA-EY-A1GR	Stage IA	11.1	67	female	black or african american	alive	1	536
TCGA-EY-A2OP	Stage IA	11.2	63	female	white	alive	1	944
TCGA-BG-A220	Stage IA	11.4	69	female	white	alive	1	434
TCGA-AP-A051	Stage IA	11.9	69	female	white	alive	1	3948
TCGA-AP-A053	Stage IA	12.3	90	female	white	dead	0	3365
TCGA-A5-A0GP	Stage IA	12.6	58	female	asian	alive	1	1416
TCGA-AP-A0LS	Stage IA	12.8	63	female	white	alive	1	2904
TCGA-BK-A4ZD	Stage IA	13	42	female	black or african american	alive	1	506
TCGA-B5-A1MW	Stage IA	13.7	55	female	white	alive	1	447
TCGA-EY-A1GH	Stage IA	13.7	70	female	white	alive	1	710
TCGA-PG-A7D5	Stage IA	13.9	63	female	black or african american	alive	1	1177
TCGA-EY-A547	Stage IA	14	75	female	black or african american	alive	1	545
TCGA-EO-A22Y	Stage IA	14.1	68	female	white	alive	1	1567
TCGA-AP-A059	Stage IA	14.4	69	female	white	alive	1	1461
TCGA-D1-A3DH	Stage IA	14.5	71	female	white	alive	1	573
TCGA-PG-A6IB	Stage IA	14.9	68	female	black or african american	alive	1	648
TCGA-EY-A3L3	Stage IA	15.3	82	female	black or african american	alive	1	832
TCGA-EO-A3KW	Stage IA	15.8	72	female		alive	1	497
TCGA-A5-A0GH	Stage IA	16.5	57	female	white	alive	1	2254
TCGA-AJ-A3EK	Stage IA	16.6	53	female	white	alive	1	446
TCGA-FI-A2EU	Stage IA	16.7	68	female		alive	1	2941
TCGA-AX-A3G6	Stage IA	17.1	67	female	white	alive	1	8
TCGA-AJ-A5DW	Stage IA	17.6	56	female	black or african american	alive	1	390
TCGA-D1-A1O0	Stage IA	19.8	77	female	white	alive	1	63
TCGA-AJ-A3EL	Stage IA	20.1	47	female	native hawaiian or other pacific islander	alive	1	684
TCGA-KJ-A3U4	Stage IA	23.2	55	female	white	alive	1	1095
TCGA-AX-A3FS	Stage IA	23.8	82	female	white	alive	1	1
TCGA-5B-A90C	Stage IA	29.3	69	female	black or african american	alive	1	1202
TCGA-BS-A0V7	Stage IB	0	48	female	native hawaiian or other pacific islander	alive	1	1934
TCGA-BS-A0V4	Stage IB	0.3	56	female	white	alive	1	1810
TCGA-D1-A168	Stage IB	0.7	67	female	white	alive	1	1098
TCGA-AX-A3GB	Stage IB	0.7	73	female	white	alive	1	440
TCGA-D1-A17B	Stage IB	0.9	69	female	white	alive	1	213
TCGA-AX-A06J	Stage IB	0.9	71	female	white	alive	1	913
TCGA-A5-A0GN	Stage IB	1	65	female	white	alive	1	1841
TCGA-B5-A0K4	Stage IB	1.3	51	female		alive	1	1757
TCGA-D1-A16O	Stage IB	1.4	44	female	white	alive	1	1023
TCGA-AP-A1E4	Stage IB	1.5	54	female	white	alive	1	1555
TCGA-D1-A17D	Stage IB	1.5	58	female	white	alive	1	926
TCGA-BG-A187	Stage IB	1.5	66	female	white	alive	1	448
TCGA-AX-A1CI	Stage IB	1.5	61	female	white	alive	1	2600
TCGA-BS-A0TC	Stage IB	1.6	70	female	asian	alive	1	2602
TCGA-D1-A16X	Stage IB	1.7	54	female	white	alive	1	111
TCGA-DF-A2KZ	Stage IB	1.7	87	female		alive	1	826
TCGA-BG-A0RY	Stage IB	1.8	68	female	white	alive	1	469
TCGA-D1-A17H	Stage IB	1.8	61	female	white	alive	1	852
TCGA-D1-A16Y	Stage IB	1.8	56	female	white	alive	1	532
TCGA-EY-A1GU	Stage IB	1.8	66	female	black or african american	dead	0	997
TCGA-BS-A0UA	Stage IB	2	68	female	white	alive	1	3495
TCGA-D1-A0ZV	Stage IB	2.2	58	female	white	alive	1	728
TCGA-A5-A0G9	Stage IB	2.2	79	female	white	alive	1	2540
TCGA-DI-A0WH	Stage IB	2.3	64	female	white	alive	1	496
TCGA-BG-A0M9	Stage IB	2.3	73	female	white	alive	1	2270
TCGA-D1-A0ZO	Stage IB	2.4	75	female	white	alive	1	602
TCGA-AX-A1CA	Stage IB	2.4	70	female	black or african american	alive	1	974
TCGA-AP-A05H	Stage IB	2.5	76	female	white	alive	1	1385
TCGA-EY-A2OO	Stage IB	2.6	56	female	white	alive	1	1392
TCGA-B5-A11Y	Stage IB	2.6	59	female	white	alive	1	560
TCGA-FI-A2CX	Stage IB	2.6	82	female	white	alive	1	2031
TCGA-AX-A05Y	Stage IB	2.6	57	female	white	alive	1	2684
TCGA-AX-A06L	Stage IB	2.7	63	female	white	alive	1	1845
TCGA-AX-A2HA	Stage IB	2.7	36	female	white	alive	1	2475
TCGA-BK-A13B	Stage IB	2.8	58	female	black or african american	alive	1	966
TCGA-B5-A11P	Stage IB	2.9	87	female	white	alive	1	1583
TCGA-AX-A1C7	Stage IB	2.9	77	female	white	alive	1	1054
TCGA-D1-A16F	Stage IB	3.1	60	female	white	alive	1	80
TCGA-D1-A176	Stage IB	3.1	67	female	white	alive	1	917
TCGA-B5-A0K8	Stage IB	3.1	71	female	white	alive	1	847
TCGA-AJ-A3IA	Stage IB	3.2	78	female	white	alive	1	633
TCGA-A5-A0GQ	Stage IB	3.2	76	female	white	alive	1	2247
TCGA-AX-A1CK	Stage IB	3.3	58	female	white	alive	1	2441
TCGA-BK-A13C	Stage IB	3.3	47	female	black or african american	alive	1	760
TCGA-D1-A0ZR	Stage IB	3.3	57	female	white	alive	1	17
TCGA-D1-A16E	Stage IB	3.4	73	female	white	alive	1	1119
TCGA-B5-A11W	Stage IB	3.4	61	female	white	alive	1	593
TCGA-AX-A063	Stage IB	3.5	63	female	white	alive	1	2417
TCGA-SJ-A6ZJ	Stage IB	3.5	61	female	black or african american	alive	1	556
TCGA-EO-A3AZ	Stage IB	3.6	80	female		alive	1	826
TCGA-BG-A0M2	Stage IB	3.7	62	female	white	alive	1	637
TCGA-BK-A0C9	Stage IB	3.7	57	female	white	alive	1	1092
TCGA-BG-A0M3	Stage IB	3.7	74	female	white	alive	1	1071
TCGA-H5-A2HR	Stage IB	4	71	female	black or african american	alive	1	39
TCGA-A5-A0R8	Stage IB	4	81	female	white	alive	1	596
TCGA-BG-A0MA	Stage IB	4	60	female	white	dead	0	326
TCGA-BG-A0VX	Stage IB	4.1	58	female	white	alive	1	1043
TCGA-D1-A0ZU	Stage IB	4.1	34	female	white	alive	1	872
TCGA-SL-A6JA	Stage IB	4.1	77	female	black or african american	alive	1	7
TCGA-D1-A0ZQ	Stage IB	4.1	90	female	white	alive	1	260
TCGA-D1-A102	Stage IB	4.2	49	female	white	alive	1	135
TCGA-BG-A2AE	Stage IB	4.2	57	female	white	alive	1	721
TCGA-E6-A8L9	Stage IB	4.3	61	female	black or african american	alive	1	1013
TCGA-A5-A0G5	Stage IB	4.3	73	female	black or african american	alive	1	1126
TCGA-AJ-A23O	Stage IB	4.3	69	female	white	dead	0	312
TCGA-EY-A1GQ	Stage IB	4.4	76	female	white	alive	1	544
TCGA-AX-A0IZ	Stage IB	4.4	53	female	white	alive	1	1333
TCGA-BS-A0TD	Stage IB	4.5	65	female	asian	alive	1	2379
TCGA-EY-A1GK	Stage IB	4.6	74	female	white	alive	1	693
TCGA-D1-A15Z	Stage IB	4.6	72	female	white	dead	0	58
TCGA-D1-A103	Stage IB	4.7	87	female	white	alive	1	669
TCGA-AX-A05U	Stage IB	4.8	56	female	american indian or alaska native	alive	1	903
TCGA-KP-A3W0	Stage IB	4.8	72	female		alive	1	404
TCGA-B5-A3F9	Stage IB	4.8	56	female	black or african american	alive	1	4155
TCGA-A5-A0VO	Stage IB	4.8	64	female	white	dead	0	875
TCGA-D1-A101	Stage IB	4.9	60	female	white	alive	1	53
TCGA-D1-A160	Stage IB	4.9	70	female	white	alive	1	112
TCGA-AP-A0LD	Stage IB	5	63	female	white	alive	1	3589
TCGA-BS-A0UM	Stage IB	5	64	female	white	alive	1	2644
TCGA-BK-A56F	Stage IB	5.3	75	female	black or african american	alive	1	401
TCGA-BG-A221	Stage IB	5.3	84	female	white	alive	1	55
TCGA-D1-A2G7	Stage IB	5.3	65	female	white	dead	0	1793
TCGA-D1-A0ZZ	Stage IB	5.5	80	female	white	alive	1	686
TCGA-AX-A05T	Stage IB	5.6	82	female	white	alive	1	1010
TCGA-BS-A0V6	Stage IB	5.7	55	female	asian	alive	1	2725
TCGA-AX-A3FW	Stage IB	5.8	66	female	white	alive	1	17
TCGA-EO-A3AY	Stage IB	5.9	58	female		alive	1	1158
TCGA-D1-A2G5	Stage IB	5.9	50	female	white	alive	1	1455
TCGA-EY-A5W2	Stage IB	6.1	72	female	black or african american	alive	1	516
TCGA-EO-A22U	Stage IB	6.3	83	female	white	alive	1	1407
TCGA-DF-A2KV	Stage IB	6.6	55	female		alive	1	2717
TCGA-AX-A062	Stage IB	6.6	53	female	white	alive	1	1399
TCGA-D1-A1NY	Stage IB	6.6	67	female	white	alive	1	513
TCGA-BG-A0LX	Stage IB	6.6	57	female	white	alive	1	614
TCGA-AJ-A8CV	Stage IB	6.8	58	female	black or african american	alive	1	1068
TCGA-B5-A0JU	Stage IB	7	57	female	black or african american	alive	1	1802
TCGA-EY-A1GC	Stage IB	7.2	62	female	white	alive	1	1647
TCGA-D1-A162	Stage IB	7.2	69	female	white	alive	1	1145
TCGA-SL-A6J9	Stage IB	7.2	73	female	black or african american	alive	1	2
TCGA-AJ-A2QO	Stage IB	7.2	85	female	white	dead	0	1045
TCGA-FI-A2D2	Stage IB	7.5	66	female	white	dead	0	2352
TCGA-EC-A1QX	Stage IB	7.6	71	female	white	alive	1	224
TCGA-KP-A3W3	Stage IB	7.7	72	female	white	alive	1	794
TCGA-BS-A0UF	Stage IB	7.7	65	female	asian	alive	1	2611
TCGA-B5-A1MX	Stage IB	7.7	47	female	white	alive	1	1473
TCGA-A5-A0RA	Stage IB	7.9	68	female	white	alive	1	884
TCGA-EY-A215	Stage IB	7.9	60	female	white	alive	1	574
TCGA-AX-A0J1	Stage IB	8	80	female	white	alive	1	2354
TCGA-AX-A3FT	Stage IB	8.2	64	female	white	alive	1	6
TCGA-AX-A1CE	Stage IB	8.2	60	female	white	alive	1	1037
TCGA-B5-A0JX	Stage IB	8.4	62	female	white	alive	1	1787
TCGA-AP-A05O	Stage IB	8.4	68	female	white	alive	1	384
TCGA-DF-A2KS	Stage IB	8.7	69	female		alive	1	3318
TCGA-EO-A1Y7	Stage IB	9.2	65	female		alive	1	1495
TCGA-SJ-A6ZI	Stage IB	9.2	64	female	black or african american	alive	1	631
TCGA-E6-A1LX	Stage IB	9.5	40	female	white	alive	1	711
TCGA-AJ-A3NH	Stage IB	9.5	90	female	white	dead	0	310
TCGA-A5-A3LP	Stage IB	9.7	74	female	white	alive	1	455
TCGA-B5-A0JR	Stage IB	9.7	73	female	white	alive	1	1731
TCGA-D1-A177	Stage IB	9.7	70	female	white	alive	1	548
TCGA-BK-A139	Stage IB	9.7	74	female	white	dead	0	943
TCGA-D1-A2G0	Stage IB	10	70	female	white	alive	1	1484
TCGA-AX-A1C4	Stage IB	10.1	52	female	white	alive	1	404
TCGA-DF-A2KU	Stage IB	10.3	female			alive	1	3067
TCGA-AX-A2H8	Stage IB	10.3	64	female	white	alive	1	1861
TCGA-AX-A2HF	Stage IB	10.4	67	female	white	alive	1	848
TCGA-EY-A1G8	Stage IB	10.7	83	female	white	dead	0	456
TCGA-AX-A1C9	Stage IB	10.9	73	female	white	alive	1	802
TCGA-D1-A15V	Stage IB	11.6	68	female	white	alive	1	1201
TCGA-B5-A0KB	Stage IB	12	62	female	black or african american	alive	1	824
TCGA-B5-A11E	Stage IB	12	53	female	white	alive	1	1820
TCGA-EO-A22R	Stage IB	13	56	female		alive	1	1878
TCGA-B5-A3FB	Stage IB	13.4	73	female	black or african american	alive	1	2844
TCGA-FI-A2D6	Stage IB	13.4	74	female	white	dead	0	767
TCGA-D1-A0ZS	Stage IB	13.6	54	female	white	alive	1	148
TCGA-EO-A3B1	Stage IB	15.6	63	female		alive	1	820
TCGA-EO-A22S	Stage IB	16.1	58	female		alive	1	1872
TCGA-A5-A0GB	Stage IB	17.3	65	female	white	alive	1	997
TCGA-EY-A1GI	Stage IB	17.9	52	female	white	alive	1	710
TCGA-AX-A0J0	Stage IB	18.2	47	female	white	alive	1	1220
TCGA-A5-A3LO	Stage IB	20.6	64	female	white	alive	1	776
TCGA-AJ-A3TW	Stage IB	22.4	78	female	white	alive	1	513
TCGA-AJ-A3EM	Stage IB	30.6	70	female	white	alive	1	677
TCGA-D1-A16D	Stage IC	1.3	49	female	white	alive	1	1141
TCGA-AX-A1CJ	Stage IC	1.7	59	female	black or african american	alive	1	2233
TCGA-D1-A16I	Stage IC	1.7	62	female	white	dead	0	350
TCGA-AX-A060	Stage IC	2.2	78	female	american indian or alaska native	alive	1	1075
TCGA-B5-A3FA	Stage IC	3.3	73	female	white	alive	1	2929
TCGA-B5-A11L	Stage IC	3.5	71	female	white	dead	0	2240
TCGA-AX-A2H7	Stage IC	4.1	87	female	white	dead	0	1241
TCGA-BS-A0U7	Stage IC	4.1	63	female	white	dead	0	935
TCGA-BG-A0MH	Stage IC	4.3	61	female	white	alive	1	1930
TCGA-AX-A0IS	Stage IC	4.4	52	female	white	dead	0	1858
TCGA-D1-A161	Stage IC	4.5	78	female	white	alive	1	892
TCGA-BS-A0TI	Stage IC	4.5	64	female	white	alive	1	1882
TCGA-D1-A16B	Stage IC	4.6	64	female	white	alive	1	1106
TCGA-FI-A2F4	Stage IC	4.7	64	female	black or african american	alive	1	2230
TCGA-D1-A175	Stage IC	4.9	48	female	white	alive	1	202
TCGA-AX-A1CC	Stage IC	6.1	65	female	white	alive	1	788
TCGA-DF-A2KN	Stage IC	6.1	female			alive	1	67
TCGA-AX-A2HG	Stage IC	6.4	56	female	white	alive	1	1163
TCGA-AJ-A3BK	Stage IC	7.2	68	female	white	alive	1	1031
TCGA-D1-A167	Stage IC	8.6	70	female	white	alive	1	478
TCGA-AX-A2HJ	Stage IC	8.9	35	female	asian	alive	1	935
TCGA-BS-A0TJ	Stage IC	11.2	59	female	asian	alive	1	2068
TCGA-B5-A1MS	Stage IC	11.8	60	female	white	dead	0	3112
TCGA-AX-A3G1	Stage IC	14.9	85	female	white	dead	0	624
TCGA-AX-A2IN	Stage IC	15.6	63	female	white	dead	0	947
TCGA-EY-A1GL	Stage II	0.5	51	female	white	alive	1	1014
TCGA-A5-AB3J	Stage II	1.7	52	female	black or african american	alive	1	512
TCGA-BG-A0W1	Stage II	1.9	89	female	white	alive	1	1607
TCGA-D1-A16Q	Stage II	2.4	54	female	white	alive	1	324
TCGA-QF-A5YS	Stage II	3.1	57	female	black or african american	alive	1	689
TCGA-AP-A05J	Stage II	4.4	66	female	white	alive	1	1122
TCGA-D1-A17M	Stage II	4.9	56	female	white	alive	1	311
TCGA-AJ-A2QN	Stage II	5.4	60	female	white	alive	1	1069
TCGA-AP-A1DV	Stage II	6.8	60	female	white	alive	1	204
TCGA-EY-A72D	Stage II	7.3	87	female	black or african american	alive	1	179
TCGA-AP-A05A	Stage II	7.3	81	female	white	dead	0	1944
TCGA-QF-A5YT	Stage II	7.8	57	female	black or african american	alive	1	1215
TCGA-AJ-A3OJ	Stage II	8.1	54	female	white	alive	1	467
TCGA-FI-A2F8	Stage II	8.2	64	female	white	alive	1	933
TCGA-EC-A24G	Stage II	8.2	57	female	white	alive	1	511
TCGA-AP-A056	Stage II	8.6	64	female	white	alive	1	2618
TCGA-B5-A11R	Stage II	8.7	51	female	black or african american	alive	1	2349
TCGA-EO-A3AU	Stage II	9.2	72	female		alive	1	1543
TCGA-B5-A0K9	Stage II	9.2	88	female	white	dead	0	409
TCGA-B5-A3FC	Stage II	9.4	53	female	black or african american	alive	1	2185
TCGA-BK-A6W3	Stage II	9.6	34	female	black or african american	alive	1	305
TCGA-EO-A3KU	Stage II	9.9	68	female		alive	1	677
TCGA-A5-A2K7	Stage II	10.4	41	female		alive	1	1063
TCGA-EY-A1G7	Stage II	10.4	86	female	white	dead	0	189
TCGA-AP-A0LT	Stage II	11.7	57	female	white	alive	1	1497
TCGA-AJ-A23M	Stage II	11.7	61	female	white	dead	0	616
TCGA-EO-A22T	Stage II	14.7	56	female	asian	alive	1	2035
TCGA-AJ-A2QM	Stage II	15.1	67	female	white	alive	1	894
TCGA-AJ-A3I9	Stage II	15.8	52	female	white	dead	0	519
TCGA-AJ-A3NG	Stage II	18.1	83	female	white	alive	1	475
TCGA-PG-A5BC	Stage II	18.4	72	female	black or african american	alive	1	707
TCGA-BG-A3PP	Stage II	19.3	82	female	white	alive	1	681
TCGA-D1-A17A	Stage IIA	1.5	59	female	white	alive	1	48
TCGA-AX-A064	Stage IIA	2.9	81	female	white	alive	1	1517
TCGA-AX-A2H2	Stage IIA	7.1	86	female	black or african american	dead	0	145
TCGA-AX-A2IO	Stage IIA	9.5	83	female	white	alive	1	1975
TCGA-BS-A0U9	Stage IIA	12.5	59	female	native hawaiian or other pacific islander	alive	1	2825
TCGA-AX-A06B	Stage IIA	13.4	72	female	white	alive	1	2058
TCGA-BS-A0UT	Stage IIB	1.2	62	female	asian	alive	1	2212
TCGA-BG-A0MK	Stage IIB	1.2	52	female	black or african american	dead	0	1317
TCGA-DI-A1BY	Stage IIB	1.3	63	female	white	alive	1	1114
TCGA-BS-A0VI	Stage IIB	1.5	58	female	white	alive	1	2646
TCGA-AX-A1CR	Stage IIB	2.6	70	female	white	alive	1	701
TCGA-AX-A05W	Stage IIB	2.6	60	female	white	alive	1	2450
TCGA-D1-A16J	Stage IIB	4	61	female	white	alive	1	910
TCGA-BS-A0V8	Stage IIB	4.4	68	female	native hawaiian or other pacific islander	alive	1	2544
TCGA-FI-A2EW	Stage IIB	5.1	71	female	black or african american	alive	1	1462
TCGA-DI-A2QY	Stage IIB	5.7	64	female	white	dead	0	3349
TCGA-AX-A3FX	Stage IIB	6.4	69	female	white	dead	0	1333
TCGA-DI-A1BU	Stage IIB	8.4	55	female	white	alive	1	1195
TCGA-AX-A1CN	Stage IIB	14	54	female	white	alive	1	1143
TCGA-BG-A3EW	Stage III	6.8	62	female	white	alive	1	344
TCGA-2E-A9G8	Stage III	14.3	female	black or african american		alive	1	1249
TCGA-AX-A06D	Stage IIIA	0.9	82	female	white	dead	0	373
TCGA-BG-A0VT	Stage IIIA	1.8	56	female	white	alive	1	1568
TCGA-5S-A9Q8	Stage IIIA	1.9	51	female	black or african american	alive	1	313
TCGA-BG-A186	Stage IIIA	1.9	61	female	black or african american	alive	1	419
TCGA-B5-A11Q	Stage IIIA	1.9	64	female	white	alive	1	976
TCGA-EY-A1GT	Stage IIIA	2.1	68	female	white	alive	1	490
TCGA-BS-A0TG	Stage IIIA	2.3	60	female	white	alive	1	2371
TCGA-BG-A0MU	Stage IIIA	2.3	78	female	white	alive	1	617
TCGA-B5-A0K2	Stage IIIA	2.5	55	female	white	alive	1	2209
TCGA-QS-A8F1	Stage IIIA	2.5	85	female	black or african american	dead	0	135
TCGA-A5-A1OK	Stage IIIA	2.7	63	female	white	alive	1	917
TCGA-AX-A05Z	Stage IIIA	2.9	37	female		alive	1	2175
TCGA-QS-A5YQ	Stage IIIA	3	55	female	black or african american	alive	1	759
TCGA-EY-A1GX	Stage IIIA	3	76	female	white	dead	0	1127
TCGA-B5-A1MR	Stage IIIA	3.1	65	female	white	alive	1	6859
TCGA-FI-A2EY	Stage IIIA	3.7	63	female	white	dead	0	880
TCGA-AX-A06H	Stage IIIA	4.2	61	female	american indian or alaska native	alive	1	833
TCGA-EY-A1GM	Stage IIIA	5	60	female	black or african american	dead	0	995
TCGA-D1-A165	Stage IIIA	5.2	64	female	white	alive	1	20
TCGA-B5-A121	Stage IIIA	5.9	57	female	white	alive	1	504
TCGA-D1-A16N	Stage IIIA	5.9	51	female	white	alive	1	945
TCGA-AX-A0IW	Stage IIIA	6.7	67	female	white	alive	1	1149
TCGA-B5-A0JT	Stage IIIA	7	63	female	white	alive	1	1682
TCGA-AX-A2H4	Stage IIIA	7.2	66	female	white	dead	0	916
TCGA-AX-A3G3	Stage IIIA	7.4	58	female	white	alive	1	42
TCGA-BG-A0VZ	Stage IIIA	7.9	58	female	white	alive	1	1601
TCGA-B5-A11H	Stage IIIA	8.2	67	female	white	alive	1	2687
TCGA-AX-A2HD	Stage IIIA	9.1	69	female	white	alive	1	1414
TCGA-AW-A1PO	Stage IIIA	9.5	66	female	white	alive	1	17
TCGA-BG-A0YV	Stage IIIA	10.7	67	female	white	alive	1	382
TCGA-A5-A2K4	Stage IIIA	10.7	69	female	white	dead	0	871
TCGA-FI-A2EX	Stage IIIA	11	58	female	white	alive	1	284
TCGA-AJ-A3OL	Stage IIIA	11.7	55	female	white	dead	0	449
TCGA-AJ-A23N	Stage IIIA	12.3	70	female	white	dead	0	439
TCGA-EO-A22X	Stage IIIA	12.9	36	female		alive	1	1752
TCGA-DI-A1NO	Stage IIIA	13	68	female	black or african american	dead	0	285
TCGA-AJ-A3QS	Stage IIIA	13.5	57	female	black or african american	alive	1	513
TCGA-KP-A3W4	Stage IIIA	15.9	63	female	white	dead	0	554
TCGA-A5-A1OH	Stage IIIA	22.3	86	female	white	alive	1	1105
TCGA-B5-A5OC	Stage IIIB	4.1	71	female	black or african american	alive	1	1249
TCGA-QS-A5YR	Stage IIIB	5.6	61	female	black or african american	alive	1	719
TCGA-QS-A744	Stage IIIB	9	86	female	black or african american	alive	1	451
TCGA-BG-A2AD	Stage IIIB	12.4	63	female	white	alive	1	609
TCGA-A5-A0G2	Stage IIIB	16.3	57	female	asian	alive	1	4549
TCGA-AX-A3FZ	Stage IIIB	24.3	33	female	white	alive	1	2
TCGA-BK-A0CB	Stage IIIC	1	60	female	white	alive	1	1092
TCGA-D1-A2G6	Stage IIIC	1.8	53	female	white	dead	0	258
TCGA-DF-A2KR	Stage IIIC	2.2	84	female		alive	1	2178
TCGA-AX-A05S	Stage IIIC	2.7	81	female	white	dead	0	413
TCGA-D1-A15W	Stage IIIC	3.1	59	female	white	alive	1	915
TCGA-BS-A0U8	Stage IIIC	3.7	55	female	white	alive	1	2963
TCGA-B5-A5OD	Stage IIIC	4	67	female	black or african american	alive	1	1038
TCGA-DF-A2L0	Stage IIIC	4	60	female		dead	0	788
TCGA-D1-A16S	Stage IIIC	5.5	70	female	white	alive	1	568
TCGA-D1-A16V	Stage IIIC	6	78	female	white	dead	0	120
TCGA-AX-A0IU	Stage IIIC	6.6	79	female	black or african american	alive	1	1087
TCGA-DI-A2QT	Stage IIIC	6.6	51	female	american indian or alaska native	dead	0	377
TCGA-AX-A2H5	Stage IIIC	7	67	female	black or african american	alive	1	2167
TCGA-AX-A1C5	Stage IIIC	7.3	47	female	white	alive	1	1001
TCGA-D1-A163	Stage IIIC	7.4	50	female	white	alive	1	991
TCGA-BK-A0CC	Stage IIIC	7.5	69	female	black or african american	alive	1	1067
TCGA-BK-A0CA	Stage IIIC	8	61	female	white	alive	1	1064
TCGA-FI-A2D4	Stage IIIC	9.1	44	female	white	dead	0	243
TCGA-AX-A1C8	Stage IIIC	9.3	77	female	white	alive	1	776
TCGA-D1-A1O8	Stage IIIC	9.5	70	female	white	dead	0	120
TCGA-DI-A1NN	Stage IIIC	10.1	63	female	white	alive	1	1076
TCGA-D1-A1NX	Stage IIIC	10.8	66	female	white	alive	1	555
TCGA-D1-A179	Stage IIIC	11.5	76	female	white	dead	0	448
TCGA-AX-A3G4	Stage IIIC	12	60	female	native hawaiian or other pacific islander	alive	1	9
TCGA-AX-A3G9	Stage IIIC	12.1	64	female	white	alive	1	558
TCGA-AX-A3GI	Stage IIIC	12.7	66	female	black or african american	alive	1	12
TCGA-D1-A3JQ	Stage IIIC	13	61	female	white	alive	1	526
TCGA-AX-A2HC	Stage IIIC	14	53	female	black or african american	alive	1	1044
TCGA-BS-A0UV	Stage IIIC	15.1	55	female	native hawaiian or other pacific islander	alive	1	2228
TCGA-AX-A2HK	Stage IIIC	17.6	77	female	white	dead	0	90
TCGA-E6-A1M0	Stage IIIC	19.3	56	female	white	alive	1	1793
TCGA-AJ-A3NF	Stage IIIC	20.7	60	female	white	alive	1	645
TCGA-EY-A1GV	Stage IIIC1	1.9	75	female	white	alive	1	481
TCGA-BG-A0M7	Stage IIIC1	2.4	60	female	white	alive	1	1937
TCGA-D1-A3DA	Stage IIIC1	2.7	77	female	white	alive	1	483
TCGA-A5-A0R6	Stage IIIC1	2.9	64	female	white	alive	1	1153
TCGA-EY-A214	Stage IIIC1	3.1	66	female	white	alive	1	438
TCGA-BG-A0MS	Stage IIIC1	4.5	53	female	white	alive	1	1882
TCGA-JU-AAVI	Stage IIIC1	4.7	61	female	black or african american	dead	0	540
TCGA-EY-A1GO	Stage IIIC1	5.3	65	female	white	alive	1	586
TCGA-AP-A1E3	Stage IIIC1	5.6	45	female	white	alive	1	847
TCGA-B5-A0JY	Stage IIIC1	6.6	50	female	white	alive	1	2107
TCGA-EO-A3AV	Stage IIIC1	6.8	51	female		alive	1	1069
TCGA-AP-A5FX	Stage IIIC1	7.2	68	female	black or african american	dead	0	1099
TCGA-AP-A1DR	Stage IIIC1	7.4	60	female	black or african american	alive	1	1495
TCGA-B5-A0JZ	Stage IIIC1	7.4	60	female	white	alive	1	2173
TCGA-AJ-A2QL	Stage IIIC1	7.6	60	female	white	alive	1	602
TCGA-EY-A4KR	Stage IIIC1	8.6	56	female	black or african american	dead	0	346
TCGA-AP-A1DQ	Stage IIIC1	9.1	76	female	white	dead	0	1423
TCGA-B5-A3S1	Stage IIIC1	9.8	71	female	white	alive	1	902
TCGA-EY-A212	Stage IIIC1	10.3	84	female	white	dead	0	310
TCGA-B5-A1N2	Stage IIIC1	11.1	70	female	black or african american	dead	0	954
TCGA-BK-A26L	Stage IIIC1	15.1	71	female	white	alive	1	734
TCGA-AP-A054	Stage IIIC1	21.7	64	female	white	dead	0	709
TCGA-AP-A05D	Stage IIIC2	2.3	67	female	white	alive	1	1758
TCGA-A5-A0G3	Stage IIIC2	2.6	61	female	black or african american	alive	1	1428
TCGA-AP-A0LM	Stage IIIC2	2.8	33	female	black or african american	alive	1	825
TCGA-AP-A0LI	Stage IIIC2	3.2	67	female	black or african american	alive	1	2972
TCGA-D1-A17U	Stage IIIC2	3.5	53	female	white	alive	1	697
TCGA-AJ-A3EJ	Stage IIIC2	4.3	74	female	white	dead	0	50
TCGA-EY-A210	Stage IIIC2	4.4	82	female	black or african american	alive	1	383
TCGA-B5-A1MY	Stage IIIC2	5.2	62	female	black or african american	dead	0	361
TCGA-BG-A0M6	Stage IIIC2	5.9	73	female	white	dead	0	671
TCGA-EY-A1H0	Stage IIIC2	6.6	57	female	black or african american	alive	1	588
TCGA-AJ-A3BD	Stage IIIC2	8.7	57	female	white	alive	1	1039
TCGA-EY-A54A	Stage IIIC2	9	68	female	black or african american	alive	1	447
TCGA-AP-A0L8	Stage IIIC2	9	70	female	black or african american	dead	0	1484
TCGA-B5-A11X	Stage IIIC2	10	66	female	black or african american	alive	1	596
TCGA-A5-A0GA	Stage IIIC2	10	67	female	white	dead	0	543
TCGA-AJ-A3BF	Stage IIIC2	10.6	65	female	white	alive	1	551
TCGA-B5-A5OE	Stage IIIC2	12.2	68	female	black or african american	alive	1	1063
TCGA-A5-A1OG	Stage IIIC2	12.4	65	female	asian	dead	0	973
TCGA-EO-A3B0	Stage IIIC2	15	43	female	asian	alive	1	1412
TCGA-AP-A1E0	Stage IIIC2	19.2	40	female	white	alive	1	1832
TCGA-FI-A3PX	Stage IIIC2	21.2	57	female	white	alive	1	2384
TCGA-EO-A1Y5	Stage IIIC2	29.9	63	female		alive	1	327
TCGA-D1-A169	Stage IV	1.3	63	female	white	alive	1	1135
TCGA-D1-A16G	Stage IV	4	74	female	white	dead	0	834
TCGA-E6-A2P8	Stage IV	8.6	53	female	black or african american	dead	0	72
TCGA-KP-A3VZ	Stage IV	24.1	69	female	white	alive	1	722
TCGA-DF-A2KY	Stage IVA	6.9	49	female		alive	1	332
TCGA-AX-A06F	Stage IVA	9.7	59	female	white	alive	1	1748
TCGA-D1-A0ZP	Stage IVA	15.6	59	female	white	alive	1	911
TCGA-BS-A0T9	Stage IVB	0.7	39	female	native hawaiian or other pacific islander	dead	0	1428
TCGA-EY-A1GW	Stage IVB	1.5	73	female	white	dead	0	337
TCGA-EY-A1GS	Stage IVB	1.9	71	female	black or african american	dead	0	670
TCGA-AX-A3G7	Stage IVB	2.3	71	female	white	alive	1	9
TCGA-D1-A1NW	Stage IVB	4.2	72	female	white	alive	1	22
TCGA-AP-A0LF	Stage IVB	4.4	82	female	white	alive	1	2859
TCGA-BS-A0TE	Stage IVB	5.6	35	female	asian	dead	0	146
TCGA-K6-A3WQ	Stage IVB	6.7	60	female	white	dead	0	427
TCGA-DI-A2QU	Stage IVB	7.3	67	female	white	dead	0	946
TCGA-B5-A0JN	Stage IVB	7.4	84	female	black or african american	alive	1	2445
TCGA-AP-A3K1	Stage IVB	7.4	56	female	white	dead	0	666
TCGA-BS-A0TA	Stage IVB	7.5	58	female	native hawaiian or other pacific islander	dead	0	740
TCGA-B5-A11U	Stage IVB	7.7	74	female	black or african american	alive	1	509
TCGA-AX-A1CF	Stage IVB	7.8	69	female	white	alive	1	2337
TCGA-EY-A2ON	Stage IVB	7.8	61	female	black or african american	dead	0	610
TCGA-FI-A2D5	Stage IVB	8.4	56	female	white	dead	0	421
TCGA-EO-A2CH	Stage IVB	8.9	73	female		dead	0	590
TCGA-B5-A11I	Stage IVB	11.6	65	female	black or african american	alive	1	2303
TCGA-AP-A052	Stage IVB	12.5	59	female	black or african american	dead	0	669
TCGA-B5-A1MU	Stage IVB	12.7	79	female	white	dead	0	1548
TCGA-EY-A3QX	Stage IVB	15.3	64	female	white	dead	0	989
TCGA-D1-A3DG	Stage IVB	17.9	81	female	white	dead	0	130
